# Supplementary material for: Ontogeny of circulating lipid metabolism in pregnancy and early childhood – a longitudinal population study
Source: eLife journal article supplement (doi:10.7554/elife.72779), 2022-02-28
Supplement: supp [file elife-72779-supp-v1.zip]

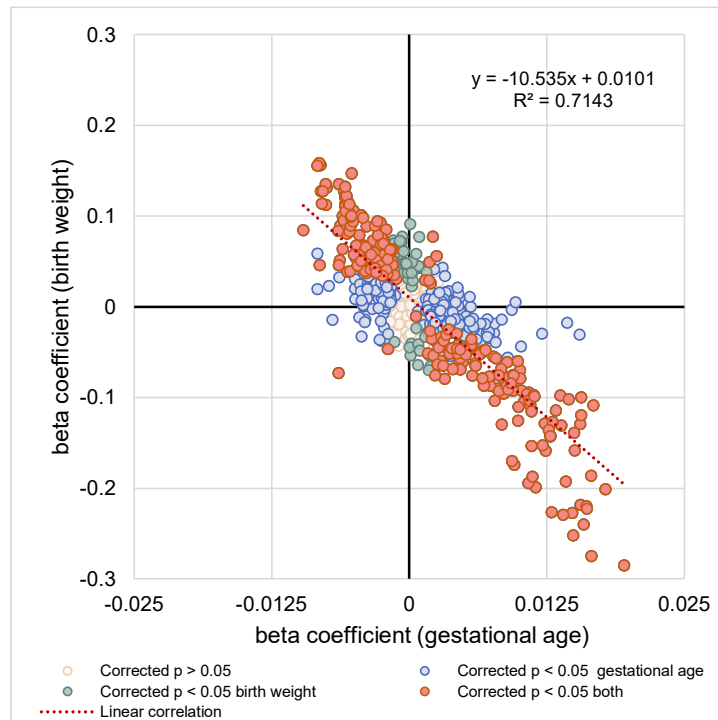

**Figure 2 – figure supplement 2** | The correlation between regression coefficients of each lipid species associated with gestational age (x-axis) and lipid species associated with birth weight (y-axis) was examined.
