# Supplementary material for: Ontogeny of circulating lipid metabolism in pregnancy and early childhood – a longitudinal population study
Source: eLife journal article supplement (doi:10.7554/elife.72779), 2022-02-28
Supplement: supp [file elife-72779-supp-v1.zip]

Archive with 8 entries (8 files):
- elife_poa_e72779_Transparent_Reporting_File.docx
- elife_poa_e72779_Figure_2_figure_supplement_1.pdf
- elife_poa_e72779_Figure_2_figure_supplement_2.pdf
- elife_poa_e72779_Figure_2_figure_supplement_3.pdf
- elife_poa_e72779_Figure_3_figure_supplement_1.pdf
- elife_poa_e72779_Figure_5_figure_supplement_1.pdf
- elife_poa_e72779_Figure_5_figure_supplement_2.pdf
- elife_poa_e72779_Supplementary_file_1.xlsx
