# Supplementary material for: Ontogeny of circulating lipid metabolism in pregnancy and early childhood – a longitudinal population study
Source: eLife journal article supplement (doi:10.7554/elife.72779), 2022-02-28
Supplement: supp [file elife-72779-supp-v1.zip]

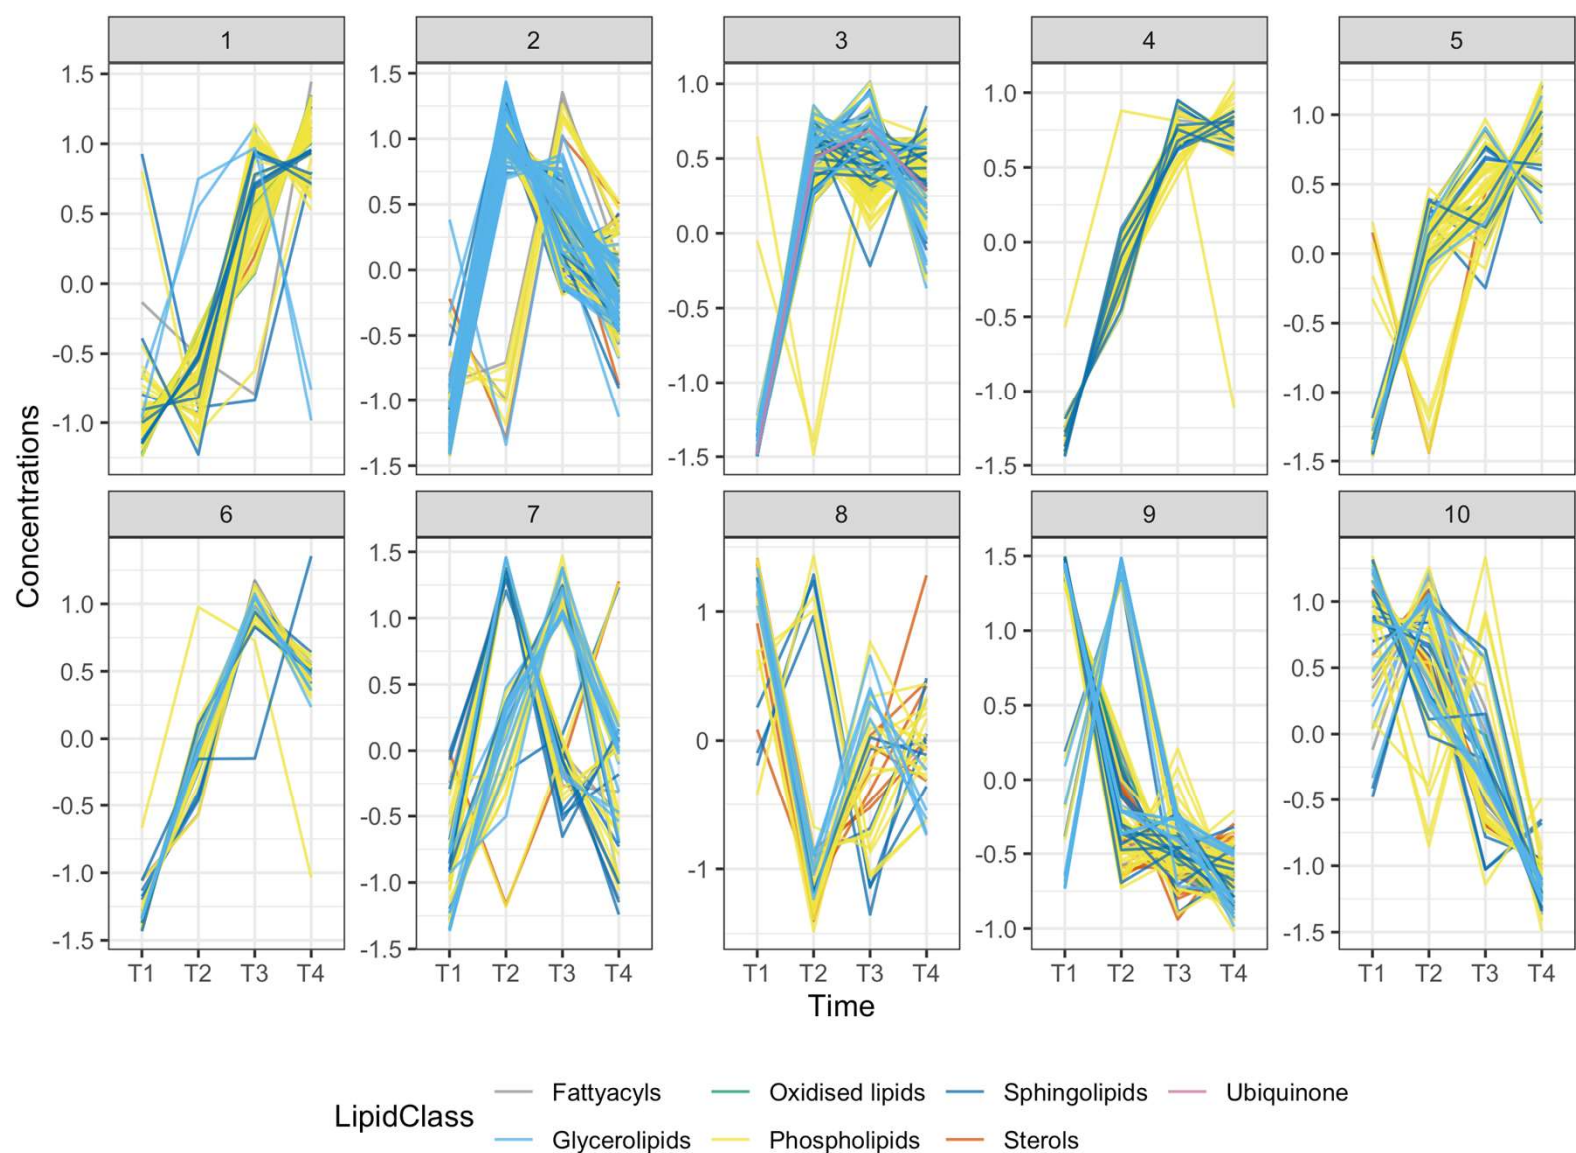

**Figure 5 – figure supplement 2| Time series clustering on lipid species identified 10 different lipid clusters.** We utilised Dynamic Time Warping (DTW) distance as a dissimilarity measurement. We used the partitional clustering method with partitions around medoids (PAM) to cluster the lipid species. We identified 10 different lipid clusters, each of them showing unique lipid trajectories over the first four years of life. Different lipid classes are shown in different colors.
