# Supplementary material for: Ontogeny of circulating lipid metabolism in pregnancy and early childhood – a longitudinal population study
Source: eLife journal article supplement (doi:10.7554/elife.72779), 2022-02-28
Supplement: supp [file elife-72779-supp-v1.zip › elife_poa_e72779_Figure_2_figure_supplement_3.pdf]

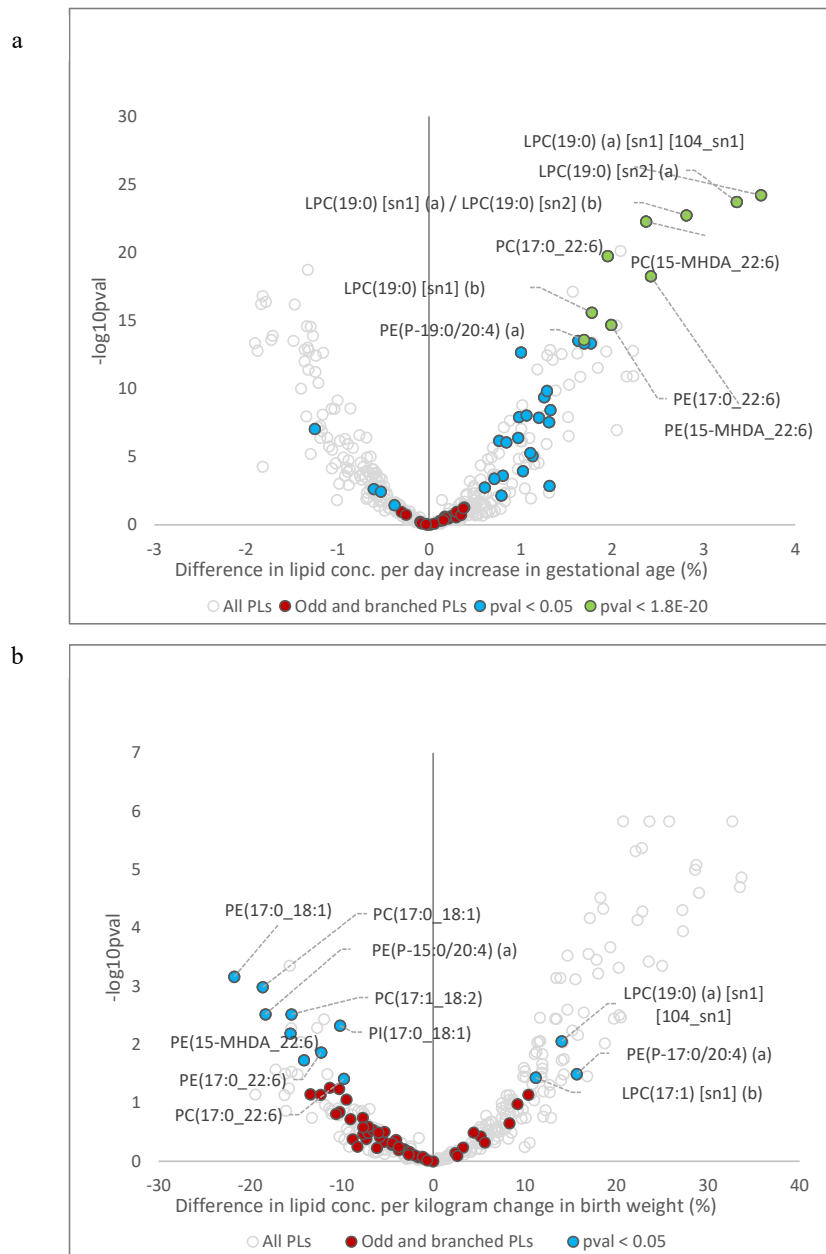

**Figure 2 – figure supplement 3| a**, Volcano plot showing newborn phospholipids associated with gestational age. **b**, Volcano plot showing newborn plasma phospholipids associated with birth weight. Open circles represent all phospholipids (PL) and lysophospholipid (LPL) species. Colored circles represent PL and LPL containing odd and branched chain fatty acids. Red circles represent non-significant associations, blue circles represent significant lipids ( $p < 0.05$ ), green circles represent 10 most significant lipids (lowest p-values)
