# Supplementary material for: Ontogeny of circulating lipid metabolism in pregnancy and early childhood – a longitudinal population study
Source: eLife journal article supplement (doi:10.7554/elife.72779), 2022-02-28
Supplement: supp [file elife-72779-supp-v1.zip › elife_poa_e72779_Figure_5_figure_supplement_1.pdf]

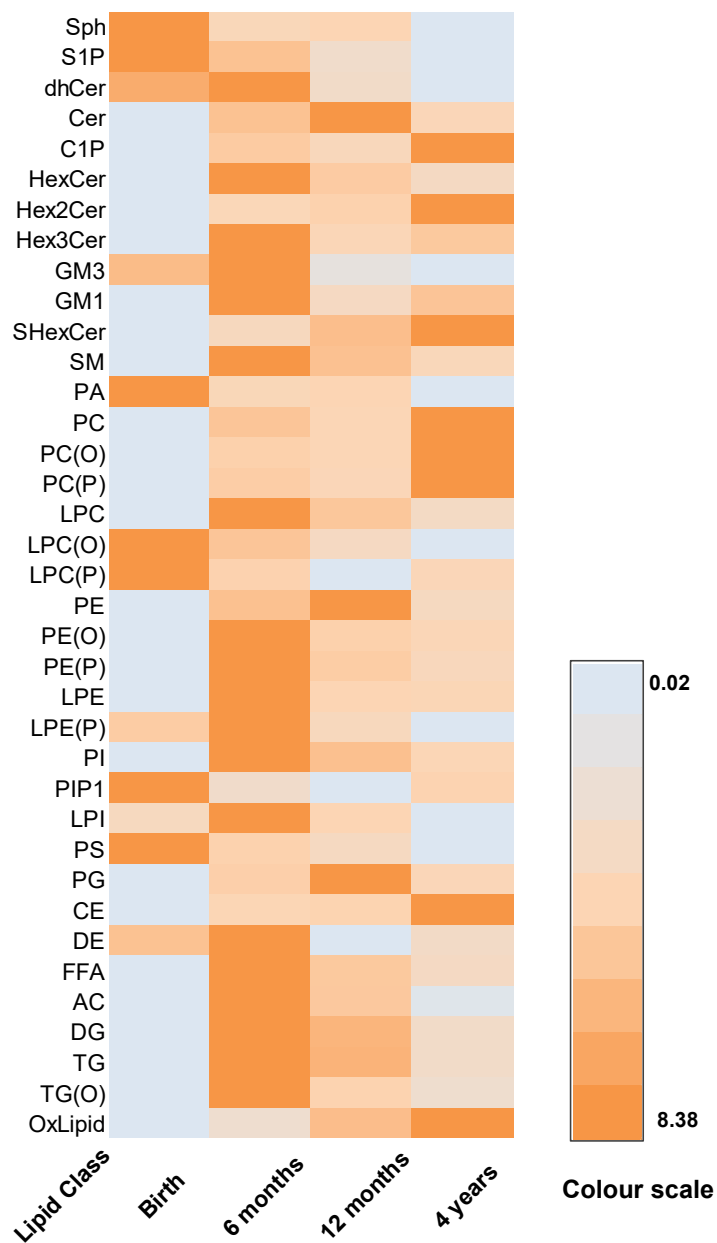

**Figure 5 – figure supplement 1** | A heat map showing the mean concentration of lipid classes at each time point. Orange: highest value, teal: lowest value.
