# Supplementary material for: Ontogeny of circulating lipid metabolism in pregnancy and early childhood – a longitudinal population study
Source: eLife journal article supplement (doi:10.7554/elife.72779), 2022-02-28
Supplement: supp [file elife-72779-supp-v1.zip › elife_poa_e72779_Supplementary_file_1.xlsx]

## Sheet: 1A
1A: MRM transitions and conditions for examined lipid species
Lipid #	Lipid species	Parent ion	Precursor ion (Q1)	Product ion (Q3)	Collision energy (V)	Internal Standard	Internal Standard amount (pmol)
1	Sph(d16:1)	[M+H]+	272.3	254.3	10	Sph(d17:1)	20
2	Sph(d18:1)	[M+H]+	300.3	282.3	10	Sph(d17:1)	20
3	Sph(d18:2)	[M+H]+	298.3	280.3	10	Sph(d17:1)	20
4	S1P(d16:1)	[M+H]+	352.2	236.3	12	S1P(d17:1) (IS)	25
5	S1P(d18:0)	[M+H]+	382.2	284.3	12	S1P(d17:1) (IS)	25
6	S1P(d18:1)	[M+H]+	380.2	264.3	12	S1P(d17:1) (IS)	25
7	S1P(d18:2)	[M+H]+	378.2	262.3	12	S1P(d17:1) (IS)	25
8	Cer(d18:0/16:0)	[M+H]+	540.5	284.3	27	dhCer 8:0 (IS)	50
9	Cer(d18:0/18:0)	[M+H]+	568.6	284.3	27	dhCer 8:0 (IS)	50
10	Cer(d18:0/20:0)	[M+H]+	596.6	284.3	27	dhCer 8:0 (IS)	50
11	Cer(d18:0/22:0)	[M+H]+	624.6	284.3	27	dhCer 8:0 (IS)	50
12	Cer(d18:0/24:0)	[M+H]+	652.7	284.3	27	dhCer 8:0 (IS)	50
13	Cer(d18:0/24:1)	[M+H]+	650.6	284.3	27	dhCer 8:0 (IS)	50
14	Cer(d16:1/16:0)	[M+H]+	510.6	236.3	25	Cer(d18:1-d7/18:0) (IS)	50
15	Cer(d16:1/18:0)	[M+H]+	538.6	236.3	25	Cer(d18:1-d7/18:0) (IS)	50
16	Cer(d16:1/20:0)	[M+H]+	566.6	236.3	25	Cer(d18:1-d7/18:0) (IS)	50
17	Cer(d16:1/22:0)	[M+H]+	594.6	236.3	25	Cer(d18:1-d7/18:0) (IS)	50
18	Cer(d16:1/23:0)	[M+H]+	608.6	236.3	25	Cer(d18:1-d7/18:0) (IS)	50
19	Cer(d16:1/24:0)	[M+H]+	622.6	236.3	25	Cer(d18:1-d7/18:0) (IS)	50
20	Cer(d16:1/24:1)	[M+H]+	620.6	236.3	25	Cer(d18:1-d7/18:0) (IS)	50
21	Cer(d17:1/16:0)	[M+H]+	524.6	250.3	25	Cer(d18:1-d7/18:0) (IS)	50
22	Cer(d17:1/18:0)	[M+H]+	552.6	250.3	25	Cer(d18:1-d7/18:0) (IS)	50
23	Cer(d17:1/20:0)	[M+H]+	580.6	250.3	25	Cer(d18:1-d7/18:0) (IS)	50
24	Cer(d17:1/22:0)	[M+H]+	608.6	250.3	25	Cer(d18:1-d7/18:0) (IS)	50
25	Cer(d17:1/23:0)	[M+H]+	622.6	250.3	25	Cer(d18:1-d7/18:0) (IS)	50
26	Cer(d17:1/24:0)	[M+H]+	636.6	250.3	25	Cer(d18:1-d7/18:0) (IS)	50
27	Cer(d17:1/24:1)	[M+H]+	634.6	250.3	25	Cer(d18:1-d7/18:0) (IS)	50
28	Cer(d18:1/14:0)	[M+H]+	510.5	264.3	25	Cer(d18:1-d7/18:0) (IS)	50
29	Cer(d18:1/16:0)	[M+H]+	538.5	264.3	25	Cer(d18:1-d7/18:0) (IS)	50
30	Cer(d18:1/17:0)	[M+H]+	552.5	264.3	25	Cer(d18:1-d7/18:0) (IS)	50
31	Cer(d18:1/18:0)	[M+H]+	566.6	264.3	25	Cer(d18:1-d7/18:0) (IS)	50
32	Cer(d18:1/19:0)	[M+H]+	580.6	264.3	25	Cer(d18:1-d7/18:0) (IS)	50
33	Cer(d18:1/20:0)	[M+H]+	594.6	264.3	25	Cer(d18:1-d7/18:0) (IS)	50
34	Cer(d18:1/21:0)	[M+H]+	608.6	264.3	25	Cer(d18:1-d7/18:0) (IS)	50
35	Cer(d18:1/22:0)	[M+H]+	622.6	264.3	25	Cer(d18:1-d7/18:0) (IS)	50
36	Cer(d18:1/23:0)	[M+H]+	636.6	264.3	25	Cer(d18:1-d7/18:0) (IS)	50
37	Cer(d18:1/24:0)	[M+H]+	650.6	264.3	25	Cer(d18:1-d7/18:0) (IS)	50
38	Cer(d18:1/24:1)	[M+H]+	648.6	264.3	25	Cer(d18:1-d7/18:0) (IS)	50
39	Cer(d18:1/26:0)	[M+H]+	678.6	264.3	25	Cer(d18:1-d7/18:0) (IS)	50
40	Cer(d18:2/14:0)	[M+H]+	508.5	262.3	25	Cer(d18:1-d7/18:0) (IS)	50
41	Cer(d18:2/16:0)	[M+H]+	536.5	262.3	25	Cer(d18:1-d7/18:0) (IS)	50
42	Cer(d18:2/17:0)	[M+H]+	550.5	262.3	25	Cer(d18:1-d7/18:0) (IS)	50
43	Cer(d18:2/18:0)	[M+H]+	564.6	262.3	25	Cer(d18:1-d7/18:0) (IS)	50
44	Cer(d18:2/20:0)	[M+H]+	592.6	262.3	25	Cer(d18:1-d7/18:0) (IS)	50
45	Cer(d18:2/21:0)	[M+H]+	606.6	262.3	25	Cer(d18:1-d7/18:0) (IS)	50
46	Cer(d18:2/22:0)	[M+H]+	620.6	262.3	25	Cer(d18:1-d7/18:0) (IS)	50
47	Cer(d18:2/23:0)	[M+H]+	634.6	262.3	25	Cer(d18:1-d7/18:0) (IS)	50
48	Cer(d18:2/24:0)	[M+H]+	648.6	262.3	25	Cer(d18:1-d7/18:0) (IS)	50
49	Cer(d18:2/24:1)	[M+H]+	646.6	262.3	25	Cer(d18:1-d7/18:0) (IS)	50
50	Cer(d18:2/26:0)	[M+H]+	676.6	262.3	25	Cer(d18:1-d7/18:0) (IS)	50
51	Cer(d19:1/16:0)	[M+H]+	552.6	278.3	25	Cer(d18:1-d7/18:0) (IS)	50
52	Cer(d19:1/18:0)	[M+H]+	580.6	278.3	25	Cer(d18:1-d7/18:0) (IS)	50
53	Cer(d19:1/20:0)	[M+H]+	608.6	278.3	25	Cer(d18:1-d7/18:0) (IS)	50
54	Cer(d19:1/22:0)	[M+H]+	636.6	278.3	25	Cer(d18:1-d7/18:0) (IS)	50
55	Cer(d19:1/23:0)	[M+H]+	650.6	278.3	25	Cer(d18:1-d7/18:0) (IS)	50
56	Cer(d19:1/24:0)	[M+H]+	664.6	278.3	25	Cer(d18:1-d7/18:0) (IS)	50
57	Cer(d19:1/24:1)	[M+H]+	662.6	278.3	25	Cer(d18:1-d7/18:0) (IS)	50
58	Cer(d19:1/26:0)	[M+H]+	692.6	278.3	25	Cer(d18:1-d7/18:0) (IS)	50
59	Cer(d20:1/22:0)	[M+H]+	650.6	292.3	25	Cer(d18:1-d7/18:0) (IS)	50
60	Cer(d20:1/23:0)	[M+H]+	664.6	292.3	25	Cer(d18:1-d7/18:0) (IS)	50
61	Cer(d20:1/24:0)	[M+H]+	678.6	292.3	25	Cer(d18:1-d7/18:0) (IS)	50
62	Cer(d20:1/24:1)	[M+H]+	676.6	292.3	25	Cer(d18:1-d7/18:0) (IS)	50
63	Cer(d20:1/26:0)	[M+H]+	706.6	292.3	25	Cer(d18:1-d7/18:0) (IS)	50
64	Cer(m18:0/20:0)	[M+H]+	580.6	268.4	35	Cer(d18:1-d7/18:0) (IS)	50
65	Cer(m18:0/22:0)	[M+H]+	608.6	268.4	35	Cer(d18:1-d7/18:0) (IS)	50
66	Cer(m18:0/23:0)	[M+H]+	622.6	268.4	35	Cer(d18:1-d7/18:0) (IS)	50
67	Cer(m18:0/24:0)	[M+H]+	636.6	268.4	35	Cer(d18:1-d7/18:0) (IS)	50
68	Cer(m18:0/24:1)	[M+H]+	634.6	268.4	35	Cer(d18:1-d7/18:0) (IS)	50
69	Cer(m18:1/18:0)	[M+H]+	550.6	266.4	35	Cer(d18:1-d7/18:0) (IS)	50
70	Cer(m18:1/20:0)	[M+H]+	578.6	266.4	35	Cer(d18:1-d7/18:0) (IS)	50
71	Cer(m18:1/22:0)	[M+H]+	606.6	266.4	35	Cer(d18:1-d7/18:0) (IS)	50
72	Cer(m18:1/23:0)	[M+H]+	620.6	266.4	35	Cer(d18:1-d7/18:0) (IS)	50
73	Cer(m18:1/24:0)	[M+H]+	634.6	266.4	35	Cer(d18:1-d7/18:0) (IS)	50
74	Cer(m18:1/24:1)	[M+H]+	632.6	266.4	35	Cer(d18:1-d7/18:0) (IS)	50
75	Cer1P(d18:1/16:0)	[M+H]+	618.424	264.3	29	Cer(d18:1-d7/18:0) (IS)	50
76	HexCer(d16:1/18:0)	[M+H]+	700.6	236.3	35	Hex1Cer(d18:1/18:1) (IS)	50
77	HexCer(d16:1/20:0)	[M+H]+	728.6	236.3	35	Hex1Cer(d18:1/18:1) (IS)	50
78	HexCer(d16:1/22:0)	[M+H]+	756.7	236.3	35	Hex1Cer(d18:1/18:1) (IS)	50
79	HexCer(d16:1/24:0)	[M+H]+	784.7	236.3	35	Hex1Cer(d18:1/18:1) (IS)	50
80	HexCer(d18:1/16:0)	[M+H]+	700.6	264.3	35	Hex1Cer(d18:1/18:1) (IS)	50
81	HexCer(d18:1/18:0)	[M+H]+	728.6	264.3	35	Hex1Cer(d18:1/18:1) (IS)	50
82	HexCer(d18:1/20:0)	[M+H]+	756.6	264.3	35	Hex1Cer(d18:1/18:1) (IS)	50
83	HexCer(d18:1/22:0)	[M+H]+	784.7	264.3	35	Hex1Cer(d18:1/18:1) (IS)	50
84	HexCer(d18:1/24:0)	[M+H]+	812.7	264.3	35	Hex1Cer(d18:1/18:1) (IS)	50
85	HexCer(d18:1/24:1)	[M+H]+	810.7	264.3	35	Hex1Cer(d18:1/18:1) (IS)	50
86	HexCer(d18:2/18:0)	[M+H]+	726.6	262.3	35	Hex1Cer(d18:1/18:1) (IS)	50
87	HexCer(d18:2/20:0)	[M+H]+	754.6	262.3	35	Hex1Cer(d18:1/18:1) (IS)	50
88	HexCer(d18:2/22:0)	[M+H]+	782.7	262.3	35	Hex1Cer(d18:1/18:1) (IS)	50
89	HexCer(d18:2/24:0)	[M+H]+	810.7	262.3	35	Hex1Cer(d18:1/18:1) (IS)	50
90	Hex2Cer(d16:1/16:0)	[M+H]+	834.6	236.3	49	Hex2Cer(d18:1/18:1) (IS)	50
91	Hex2Cer(d16:1/24:1)	[M+H]+	944.7	236.3	49	Hex2Cer(d18:1/18:1) (IS)	50
92	Hex2Cer(d18:1/16:0)	[M+H]+	862.6	264.3	49	Hex2Cer(d18:1/18:1) (IS)	50
93	Hex2Cer(d18:1/18:0)	[M+H]+	890.7	264.3	49	Hex2Cer(d18:1/18:1) (IS)	50
94	Hex2Cer(d18:1/20:0)	[M+H]+	918.7	264.3	49	Hex2Cer(d18:1/18:1) (IS)	50
95	Hex2Cer(d18:1/22:0)	[M+H]+	946.7	264.3	49	Hex2Cer(d18:1/18:1) (IS)	50
96	Hex2Cer(d18:1/24:0)	[M+H]+	974.8	264.3	49	Hex2Cer(d18:1/18:1) (IS)	50
97	Hex2Cer(d18:1/24:1)	[M+H]+	972.7	264.3	49	Hex2Cer(d18:1/18:1) (IS)	50
98	Hex2Cer(d18:2/16:0)	[M+H]+	860.6	262.3	49	Hex2Cer(d18:1/18:1) (IS)	50
99	Hex2Cer(d18:2/24:1)	[M+H]+	970.7	262.3	49	Hex2Cer(d18:1/18:1) (IS)	50
100	Hex3Cer(d18:1/16:0)	[M+H]+	1024.7	264.3	61	Hex3Cer(d18:1/17:0) (IS)	25
101	Hex3Cer(d18:1/18:0)	[M+H]+	1052.7	264.3	61	Hex3Cer(d18:1/17:0) (IS)	25
102	Hex3Cer(d18:1/20:0)	[M+H]+	1080.7	264.3	61	Hex3Cer(d18:1/17:0) (IS)	25
103	Hex3Cer(d18:1/22:0)	[M+H]+	1108.8	264.3	61	Hex3Cer(d18:1/17:0) (IS)	25
104	Hex3Cer(d18:1/24:0)	[M+H]+	1136.8	264.3	61	Hex3Cer(d18:1/17:0) (IS)	25
105	Hex3Cer(d18:1/24:1)	[M+H]+	1134.8	264.3	61	Hex3Cer(d18:1/17:0) (IS)	25
106	GM3(d18:1/16:0)	[M+H]+	1153.7	264.3	61	Hex3Cer(d18:1/17:0) (IS)	25
107	GM3(d18:1/18:0)	[M+H]+	1181.8	264.3	61	Hex3Cer(d18:1/17:0) (IS)	25
108	GM3(d18:1/20:0)	[M+H]+	1209.8	264.3	61	Hex3Cer(d18:1/17:0) (IS)	25
109	GM3(d18:1/22:0)	[M+H]+	1237.8	264.3	61	Hex3Cer(d18:1/17:0) (IS)	25
110	GM3(d18:1/24:0)	[M+H]+	1265.8	264.3	61	Hex3Cer(d18:1/17:0) (IS)	25
111	GM3(d18:1/24:1)	[M+H]+	1263.8	264.3	61	Hex3Cer(d18:1/17:0) (IS)	25
112	GM1(d18:1/16:0)	[M+2H]2+	760.1	366.2	9	Hex3Cer(d18:1/17:0) (IS)	25
113	Sulfatide (d18:1:/16:0(OH))	[M+H]+	796.8	264.3	56	Sulfatide (d18:1:/12:0) (IS)	10
114	Sulfatide (d18:1:/16:0)	[M+H]+	780.8	264.3	56	Sulfatide (d18:1:/12:0) (IS)	10
115	Sulfatide (d18:1:/24:0(OH))	[M+H]+	908.8	264.3	56	Sulfatide (d18:1:/12:0) (IS)	10
116	Sulfatide (d18:1:/24:0)	[M+H]+	892.8	264.3	56	Sulfatide (d18:1:/12:0) (IS)	10
117	Sulfatide (d18:1:/24:1(OH))	[M+H]+	906.8	264.3	56	Sulfatide (d18:1:/12:0) (IS)	10
118	Sulfatide (d18:1:/24:1)	[M+H]+	890.8	264.3	56	Sulfatide (d18:1:/12:0) (IS)	10
119	SM(34:3)	[M+H]+	699.5	184.1	29	SM 30:1 (IS)	100
120	SM(35:2) (b)	[M+H]+	715.6	184.1	29	SM 30:1 (IS)	100
121	SM(37:1)	[M+H]+	745.6	184.1	29	SM 30:1 (IS)	100
122	SM(37:2)	[M+H]+	743.5	184.1	29	SM 30:1 (IS)	100
123	SM(38:3) (a)	[M+H]+	755.6	184.1	29	SM 30:1 (IS)	100
124	SM(38:3) (b)	[M+H]+	755.6	184.1	29	SM 30:1 (IS)	100
125	SM(40:3) (a)	[M+H]+	783.6	184.1	29	SM 30:1 (IS)	100
126	SM(40:3) (b)	[M+H]+	783.6	184.1	29	SM 30:1 (IS)	100
127	SM(41:0)	[M+H]+	803.7	184.1	29	SM 30:1 (IS)	100
128	SM(41:1) (a)	[M+H]+	801.7	184.1	29	SM 30:1 (IS)	100
129	SM(43:1)	[M+H]+	829.7	184.1	29	SM 30:1 (IS)	100
130	SM(43:2) (b)	[M+H]+	827.7	184.1	29	SM 30:1 (IS)	100
131	SM(43:2) (c)	[M+H]+	827.7	184.1	29	SM 30:1 (IS)	100
132	SM(44:1)	[M+H]+	843.6	184.1	29	SM 30:1 (IS)	100
133	SM(44:2)	[M+H]+	841.6	184.1	29	SM 30:1 (IS)	100
134	SM(44:3)	[M+H]+	839.6	184.1	29	SM 30:1 (IS)	100
135	SM(d16:1/19:0)	[M+H]+	717.6	184.1	29	SM 30:1 (IS)	100
136	SM(d16:1/23:0)/SM(d17:1/22:0)	[M+H]+	773.7	184.1	29	SM 30:1 (IS)	100
137	SM(d16:1/24:1)	[M+H]+	785.7	184.1	29	SM 30:1 (IS)	100
138	SM(d17:1/14:0)	[M+H]+	661.5	184.1	29	SM 30:1 (IS)	100
139	SM(d17:1/16:0)	[M+H]+	689.6	184.1	29	SM 30:1 (IS)	100
140	SM(d17:1/24:1)	[M+H]+	799.7	184.1	29	SM 30:1 (IS)	100
141	SM(d18:0/14:0)	[M+H]+	677.6	184.1	29	SM 30:1 (IS)	100
142	SM(d18:0/16:0)	[M+H]+	705.6	184.1	29	SM 30:1 (IS)	100
143	SM(d18:0/22:0)	[M+H]+	789.7	184.1	29	SM 30:1 (IS)	100
144	SM(d18:1/14:0/SM(d16:1/16:0)	[M+H]+	675.5	184.1	29	SM 30:1 (IS)	100
145	SM(d18:1/16:0)	[M+H]+	703.6	184.1	29	SM 30:1 (IS)	100
146	SM(d18:1/17:0)/SM(d17:1/18:0)	[M+H]+	717.6	184.1	29	SM 30:1 (IS)	100
147	SM(d18:1/18:0/SM(d16:1/20:0)	[M+H]+	731.6	184.1	29	SM 30:1 (IS)	100
148	SM(d18:1/20:0)/SM(d16:1/22:0)	[M+H]+	759.6	184.1	29	SM 30:1 (IS)	100
149	SM(d18:1/22:0)/SM(d16:1/24:0)	[M+H]+	787.7	184.1	29	SM 30:1 (IS)	100
150	SM(d18:1/23:0)/SM(d17:1/24:0)	[M+H]+	801.7	184.1	29	SM 30:1 (IS)	100
151	SM(d18:1/24:0)	[M+H]+	815.7	184.1	29	SM 30:1 (IS)	100
152	SM(d18:1/24:1)	[M+H]+	813.7	184.1	29	SM 30:1 (IS)	100
153	SM(d18:2/14:0)	[M+H]+	673.5	184.1	29	SM 30:1 (IS)	100
154	SM(d18:2/16:0)	[M+H]+	701.6	184.1	29	SM 30:1 (IS)	100
155	SM(d18:2/17:0)	[M+H]+	715.6	184.1	29	SM 30:1 (IS)	100
156	SM(d18:2/18:0)	[M+H]+	729.6	184.1	29	SM 30:1 (IS)	100
157	SM(d18:2/18:1)	[M+H]+	727.6	184.1	29	SM 30:1 (IS)	100
158	SM(d18:2/20:0)	[M+H]+	757.6	184.1	29	SM 30:1 (IS)	100
159	SM(d18:2/22:0)	[M+H]+	785.7	184.1	29	SM 30:1 (IS)	100
160	SM(d18:2/23:0)	[M+H]+	799.7	184.1	29	SM 30:1 (IS)	100
161	SM(d18:2/24:0)	[M+H]+	813.7	184.1	29	SM 30:1 (IS)	100
162	SM(d19:1/24:1)	[M+H]+	827.7	184.1	29	SM 30:1 (IS)	100
163	PA(34:1)	[M+H]+	692.6	577.6	13	PA 34:0 (IS)	50
164	PA(36:1)	[M+H]+	720.6	605.6	13	PA 34:0 (IS)	50
165	PA(36:2)	[M+H]+	718.6	603.6	13	PA 34:0 (IS)	50
166	PA(36:3)	[M+H]+	716.6	601.6	13	PA 34:0 (IS)	50
167	PA(36:4)	[M+H]+	714.6	599.6	13	PA 34:0 (IS)	50
168	PA(40:6)	[M+H]+	766.6	651.6	13	PA 34:0 (IS)	50
169	PC(14:0_16:0)	[M+H]+	706.5	184.1	25	PC 13:0 13:0 (IS)	100
170	PC(14:0_20:4)	[M+H]+	754.5	184.1	25	PC 13:0 13:0 (IS)	100
171	PC(14:0_22:6)	[M+H]+	778.5	184.1	25	PC 13:0 13:0 (IS)	100
172	PC(15-MHDA_18:1)	[M+H]+	774.6	184.1	25	PC 13:0 13:0 (IS)	100
173	PC(15-MHDA_18:2)	[M+H]+	772.6	184.1	25	PC 13:0 13:0 (IS)	100
174	PC(15-MHDA_20:4)	[M+H]+	796.6	184.1	25	PC 13:0 13:0 (IS)	100
175	PC(15-MHDA_22:6)	[M+H]+	820.6	184.1	25	PC 13:0 13:0 (IS)	100
176	PC(15:0_20:3)	[M+H]+	770.6	184.1	25	PC 13:0 13:0 (IS)	100
177	PC(15:0_20:4)	[M+H]+	768.6	184.1	25	PC 13:0 13:0 (IS)	100
178	PC(15:0_22:6)	[M+H]+	792.6	184.1	25	PC 13:0 13:0 (IS)	100
179	PC(16:0_16:0)	[M+H]+	734.6	184.1	25	PC 13:0 13:0 (IS)	100
180	PC(16:0_18:0)	[M+H]+	762.6	184.1	25	PC 13:0 13:0 (IS)	100
181	PC(16:0_18:1)	[M+H]+	760.6	184.1	25	PC 13:0 13:0 (IS)	100
182	PC(16:0_18:2)	[M+H]+	758.6	184.1	25	PC 13:0 13:0 (IS)	100
183	PC(16:0_18:3) (a)	[M+H]+	756.6	184.1	25	PC 13:0 13:0 (IS)	100
184	PC(16:0_18:3) (b)	[M+H]+	756.6	184.1	25	PC 13:0 13:0 (IS)	100
185	PC(16:0_20:3) (a)	[M+H]+	784.6	184.1	25	PC 13:0 13:0 (IS)	100
186	PC(16:0_20:3) (b)	[M+H]+	784.6	184.1	25	PC 13:0 13:0 (IS)	100
187	PC(16:0_20:4)	[M+H]+	782.6	184.1	25	PC 13:0 13:0 (IS)	100
188	PC(16:0_20:5)	[M+H]+	780.6	184.1	25	PC 13:0 13:0 (IS)	100
189	PC(16:0_22:6)	[M+H]+	806.6	184.1	25	PC 13:0 13:0 (IS)	100
190	PC(16:1_18:2)	[M+H]+	756.6	184.1	25	PC 13:0 13:0 (IS)	100
191	PC(16:1_20:4)	[M+H]+	780.6	184.1	25	PC 13:0 13:0 (IS)	100
192	PC(16:1_22:6)	[M+H]+	804.6	184.1	25	PC 13:0 13:0 (IS)	100
193	PC(17:0_18:1)	[M+H]+	774.6	184.1	25	PC 13:0 13:0 (IS)	100
194	PC(17:0_18:2)	[M+H]+	772.6	184.1	25	PC 13:0 13:0 (IS)	100
195	PC(17:0_20:4)	[M+H]+	796.6	184.1	25	PC 13:0 13:0 (IS)	100
196	PC(17:0_22:6)	[M+H]+	820.6	184.1	25	PC 13:0 13:0 (IS)	100
197	PC(17:1_18:2)	[M+H]+	770.6	184.1	25	PC 13:0 13:0 (IS)	100
198	PC(18:0_18:1)	[M+H]+	788.6	184.1	25	PC 13:0 13:0 (IS)	100
199	PC(18:0_18:2)	[M+H]+	786.6	184.1	25	PC 13:0 13:0 (IS)	100
200	PC(18:0_20:3)	[M+H]+	812.6	184.1	25	PC 13:0 13:0 (IS)	100
201	PC(18:0_20:4)	[M+H]+	810.6	184.1	25	PC 13:0 13:0 (IS)	100
202	PC(18:0_22:4)	[M+H]+	838.6	184.1	25	PC 13:0 13:0 (IS)	100
203	PC(18:0_22:5) (n3)	[M+H]+	836.6	184.1	25	PC 13:0 13:0 (IS)	100
204	PC(18:0_22:5) (n6)	[M+H]+	836.6	184.1	25	PC 13:0 13:0 (IS)	100
205	PC(18:0_22:6)	[M+H]+	834.6	184.1	25	PC 13:0 13:0 (IS)	100
206	PC(18:1_18:1)	[M+H]+	786.6	184.1	25	PC 13:0 13:0 (IS)	100
207	PC(18:1_18:2)	[M+H]+	784.6	184.1	25	PC 13:0 13:0 (IS)	100
208	PC(18:1_20:3)	[M+H]+	810.6	184.1	25	PC 13:0 13:0 (IS)	100
209	PC(18:1_22:6) (a)	[M+H]+	832.6	184.1	25	PC 13:0 13:0 (IS)	100
210	PC(18:1_22:6) (b)	[M+H]+	832.6	184.1	25	PC 13:0 13:0 (IS)	100
211	PC(18:2_18:2)	[M+H]+	782.6	184.1	25	PC 13:0 13:0 (IS)	100
212	PC(18:2_20:5)	[M+H]+	804.6	184.1	25	PC 13:0 13:0 (IS)	100
213	PC(20:0_20:4)	[M+H]+	838.6	184.1	25	PC 13:0 13:0 (IS)	100
214	PC(28:0)	[M+H]+	678.5	184.1	25	PC 13:0 13:0 (IS)	100
215	PC(31:0) (a)	[M+H]+	720.6	184.1	25	PC 13:0 13:0 (IS)	100
216	PC(31:0) (b)	[M+H]+	720.6	184.1	25	PC 13:0 13:0 (IS)	100
217	PC(32:1)	[M+H]+	732.6	184.1	25	PC 13:0 13:0 (IS)	100
218	PC(32:2)	[M+H]+	730.5	184.1	25	PC 13:0 13:0 (IS)	100
219	PC(33:0) (a)	[M+H]+	748.6	184.1	25	PC 13:0 13:0 (IS)	100
220	PC(33:0) (b)	[M+H]+	748.6	184.1	25	PC 13:0 13:0 (IS)	100
221	PC(33:1)	[M+H]+	746.6	184.1	25	PC 13:0 13:0 (IS)	100
222	PC(33:2)	[M+H]+	744.6	184.1	25	PC 13:0 13:0 (IS)	100
223	PC(34:5)	[M+H]+	752.5	184.1	25	PC 13:0 13:0 (IS)	100
224	PC(35:5)	[M+H]+	766.5	184.1	25	PC 13:0 13:0 (IS)	100
225	PC(36:6) (a)	[M+H]+	778.5	184.1	25	PC 13:0 13:0 (IS)	100
226	PC(38:2)	[M+H]+	814.6	184.1	25	PC 13:0 13:0 (IS)	100
227	PC(38:4) (b)	[M+H]+	810.6	184.1	25	PC 13:0 13:0 (IS)	100
228	PC(38:5) (a)	[M+H]+	808.6	184.1	25	PC 13:0 13:0 (IS)	100
229	PC(38:5) (b)	[M+H]+	808.6	184.1	25	PC 13:0 13:0 (IS)	100
230	PC(38:6) (a)	[M+H]+	806.6	184.1	25	PC 13:0 13:0 (IS)	100
231	PC(38:7)(c)	[M+H]+	804.6	184.1	25	PC 13:0 13:0 (IS)	100
232	PC(39:5)(a)	[M+H]+	822.6	184.1	25	PC 13:0 13:0 (IS)	100
233	PC(39:5)(b)	[M+H]+	822.6	184.1	25	PC 13:0 13:0 (IS)	100
234	PC(40:10)	[M+H]+	826.6	184.1	25	PC 13:0 13:0 (IS)	100
235	PC(40:7) (a)	[M+H]+	832.6	184.1	25	PC 13:0 13:0 (IS)	100
236	PC(40:8)	[M+H]+	830.6	184.1	25	PC 13:0 13:0 (IS)	100
237	PC(44:12)	[M+H]+	878.6	184.1	25	PC 13:0 13:0 (IS)	100
238	PC(O-16:0/16:0)	[M+H]+	720.6	184.1	25	PC 13:0 13:0 (IS)	100
239	PC(O-16:0/20:3)	[M+H]+	770.6	184.1	25	PC 13:0 13:0 (IS)	100
240	PC(O-16:0/20:4)	[M+H]+	768.6	184.1	25	PC 13:0 13:0 (IS)	100
241	PC(O-16:0/22:6)	[M+H]+	792.6	184.1	25	PC 13:0 13:0 (IS)	100
242	PC(O-18:0/18:1)	[M+H]+	774.6	184.1	25	PC 13:0 13:0 (IS)	100
243	PC(O-18:0/18:2)	[M+H]+	772.6	184.1	25	PC 13:0 13:0 (IS)	100
244	PC(O-18:0/20:4)	[M+H]+	796.6	184.1	25	PC 13:0 13:0 (IS)	100
245	PC(O-18:0/22:6)	[M+H]+	820.6	184.1	25	PC 13:0 13:0 (IS)	100
246	PC(O-18:1/18:1)	[M+H]+	772.6	184.1	25	PC 13:0 13:0 (IS)	100
247	PC(O-18:1/18:2)	[M+H]+	770.6	184.1	25	PC 13:0 13:0 (IS)	100
248	PC(O-32:1)	[M+H]+	718.5	184.1	25	PC 13:0 13:0 (IS)	100
249	PC(O-32:2)	[M+H]+	716.6	184.1	25	PC 13:0 13:0 (IS)	100
250	PC(O-34:1)	[M+H]+	746.6	184.1	25	PC 13:0 13:0 (IS)	100
251	PC(O-34:2)	[M+H]+	744.6	184.1	25	PC 13:0 13:0 (IS)	100
252	PC(O-34:4)	[M+H]+	740.6	184.1	25	PC 13:0 13:0 (IS)	100
253	PC(O-35:4)	[M+H]+	754.5	184.1	25	PC 13:0 13:0 (IS)	100
254	PC(O-36:0)	[M+H]+	776.6	184.1	25	PC 13:0 13:0 (IS)	100
255	PC(O-36:5)	[M+H]+	766.5	184.1	25	PC 13:0 13:0 (IS)	100
256	PC(O-38:5)	[M+H]+	794.6	184.1	25	PC 13:0 13:0 (IS)	100
257	PC(O-40:5)	[M+H]+	822.6	184.1	25	PC 13:0 13:0 (IS)	100
258	PC(O-40:7) (a)	[M+H]+	818.6	184.1	25	PC 13:0 13:0 (IS)	100
259	PC(O-40:7) (b)	[M+H]+	818.6	184.1	25	PC 13:0 13:0 (IS)	100
260	PC(P-15:0/20:4) (a)	[M+H]+	752.6	184.1	25	PC 13:0 13:0 (IS)	100
261	PC(P-15:0/20:4) (b)	[M+H]+	752.6	184.1	25	PC 13:0 13:0 (IS)	100
262	PC(P-16:0/14:0)	[M+H]+	690.4	184.1	25	PC 13:0 13:0 (IS)	100
263	PC(P-16:0/16:0)	[M+H]+	718.5	184.1	25	PC 13:0 13:0 (IS)	100
264	PC(P-16:0/16:1)	[M+H]+	716.6	184.1	25	PC 13:0 13:0 (IS)	100
265	PC(P-16:0/18:0)	[M+H]+	746.6	184.1	25	PC 13:0 13:0 (IS)	100
266	PC(P-16:0/18:1)	[M+H]+	744.6	184.1	25	PC 13:0 13:0 (IS)	100
267	PC(P-16:0/18:2)	[M+H]+	742.5	184.1	25	PC 13:0 13:0 (IS)	100
268	PC(P-16:0/18:3)	[M+H]+	740.6	184.1	25	PC 13:0 13:0 (IS)	100
269	PC(P-16:0/20:4)	[M+H]+	766.5	184.1	25	PC 13:0 13:0 (IS)	100
270	PC(P-16:0/20:5)	[M+H]+	764.6	184.1	25	PC 13:0 13:0 (IS)	100
271	PC(P-16:0/22:6)	[M+H]+	790.6	184.1	25	PC 13:0 13:0 (IS)	100
272	PC(P-17:0/20:4) (a)	[M+H]+	780.5	184.1	25	PC 13:0 13:0 (IS)	100
273	PC(P-17:0/20:4) (b)	[M+H]+	780.5	184.1	25	PC 13:0 13:0 (IS)	100
274	PC(P-18:0/18:2)	[M+H]+	770.6	184.1	25	PC 13:0 13:0 (IS)	100
275	PC(P-18:0/20:4)	[M+H]+	794.6	184.1	25	PC 13:0 13:0 (IS)	100
276	PC(P-18:0/22:5)	[M+H]+	820.6	184.1	25	PC 13:0 13:0 (IS)	100
277	PC(P-18:0/22:6)	[M+H]+	818.6	184.1	25	PC 13:0 13:0 (IS)	100
278	PC(P-18:1/18:1)	[M+H]+	770.6	184.1	25	PC 13:0 13:0 (IS)	100
279	PC(P-18:1/22:6)	[M+H]+	816.6	184.1	25	PC 13:0 13:0 (IS)	100
280	PC(P-20:0/20:4)	[M+H]+	822.6	184.1	25	PC 13:0 13:0 (IS)	100
281	PC(P-35:2)(a)	[M+H]+	756.6	184.1	25	PC 13:0 13:0 (IS)	100
282	PC(P-35:2)(b)	[M+H]+	756.6	184.1	25	PC 13:0 13:0 (IS)	100
283	PC(P-36:3)	[M+H]+	768.5	184.1	25	PC 13:0 13:0 (IS)	100
284	PC(P-38:5) (a)	[M+H]+	792.6	184.1	25	PC 13:0 13:0 (IS)	100
285	PC(P-38:5) (b)	[M+H]+	792.6	184.1	25	PC 13:0 13:0 (IS)	100
286	LPC(14:0) [sn1]	[M+H]+	468.3	184.1	21	LPC 13:0 (IS)	100
287	LPC(14:0) [sn2]	[M+H]+	468.3	184.1	21	LPC 13:0 (IS)	100
288	LPC(15-MHDA) [sn1] [104_sn1]	[M+H]+	510.4	184.1	21	LPC 13:0 (IS)	100
289	LPC(15-MHDA) [sn1] / LPC(17:0) [sn2]	[M+H]+	510.4	184.1	21	LPC 13:0 (IS)	100
290	LPC(15-MHDA) [sn2]	[M+H]+	510.4	184.1	21	LPC 13:0 (IS)	100
291	LPC(15:0) [sn1]	[M+H]+	482.3	184.1	21	LPC 13:0 (IS)	100
292	LPC(15:0) [sn2]	[M+H]+	482.3	184.1	21	LPC 13:0 (IS)	100
293	LPC(16:0) [sn1]	[M+H]+	496.3	184.1	21	LPC 13:0 (IS)	100
294	LPC(16:0) [sn2]	[M+H]+	496.3	184.1	21	LPC 13:0 (IS)	100
295	LPC(16:1) [sn1]	[M+H]+	494.3	184.1	21	LPC 13:0 (IS)	100
296	LPC(16:1) [sn2]	[M+H]+	494.3	184.1	21	LPC 13:0 (IS)	100
297	LPC(17:0) [sn1]	[M+H]+	510.4	184.1	21	LPC 13:0 (IS)	100
298	LPC(17:1) (a) [sn1] [104_sn1]	[M+H]+	508.4	184.1	21	LPC 13:0 (IS)	100
299	LPC(17:1) [sn1] (a) / LPC(17:1) [sn2] (b)	[M+H]+	508.4	184.1	21	LPC 13:0 (IS)	100
300	LPC(17:1) [sn1] (b)	[M+H]+	508.4	184.1	21	LPC 13:0 (IS)	100
301	LPC(17:1) [sn2] (a)	[M+H]+	508.4	184.1	21	LPC 13:0 (IS)	100
302	LPC(18:0) [sn1]	[M+H]+	524.4	184.1	21	LPC 13:0 (IS)	100
303	LPC(18:0) [sn2]	[M+H]+	524.4	184.1	21	LPC 13:0 (IS)	100
304	LPC(18:1) [sn1]	[M+H]+	522.4	184.1	21	LPC 13:0 (IS)	100
305	LPC(18:1) [sn2]	[M+H]+	522.4	184.1	21	LPC 13:0 (IS)	100
306	LPC(18:2) [sn1]	[M+H]+	520.3	184.1	21	LPC 13:0 (IS)	100
307	LPC(18:2) [sn2]	[M+H]+	520.3	184.1	21	LPC 13:0 (IS)	100
308	LPC(18:3) (a) [sn1] [104_sn1]	[M+H]+	518.3	184.1	21	LPC 13:0 (IS)	100
309	LPC(18:3) [sn1] (a)/LPC(18:3) [sn2] (b)	[M+H]+	518.3	184.1	21	LPC 13:0 (IS)	100
310	LPC(18:3) [sn1] (b)	[M+H]+	518.3	184.1	21	LPC 13:0 (IS)	100
311	LPC(18:3) [sn2] (a)	[M+H]+	518.3	184.1	21	LPC 13:0 (IS)	100
312	LPC(19:0) (a) [sn1] [104_sn1]	[M+H]+	538.4	184.1	21	LPC 13:0 (IS)	100
313	LPC(19:0) [sn1] (a) / LPC(19:0) [sn2] (b)	[M+H]+	538.4	184.1	21	LPC 13:0 (IS)	100
314	LPC(19:0) [sn1] (b)	[M+H]+	538.4	184.1	21	LPC 13:0 (IS)	100
315	LPC(19:0) [sn2] (a)	[M+H]+	538.4	184.1	21	LPC 13:0 (IS)	100
316	LPC(19:1) (a)	[M+H]+	536.4	184.1	21	LPC 13:0 (IS)	100
317	LPC(19:1) (b)	[M+H]+	536.4	184.1	21	LPC 13:0 (IS)	100
318	LPC(19:1) (c)	[M+H]+	536.4	184.1	21	LPC 13:0 (IS)	100
319	LPC(20:0) [sn1]	[M+H]+	552.4	184.1	21	LPC 13:0 (IS)	100
320	LPC(20:0) [sn2]	[M+H]+	552.4	184.1	21	LPC 13:0 (IS)	100
321	LPC(20:1) [sn1]	[M+H]+	550.4	184.1	21	LPC 13:0 (IS)	100
322	LPC(20:1) [sn2]	[M+H]+	550.4	184.1	21	LPC 13:0 (IS)	100
323	LPC(20:2) [sn1]	[M+H]+	548.4	184.1	21	LPC 13:0 (IS)	100
324	LPC(20:2) [sn2]	[M+H]+	548.4	184.1	21	LPC 13:0 (IS)	100
325	LPC(20:3) [sn1]	[M+H]+	546.4	184.1	21	LPC 13:0 (IS)	100
326	LPC(20:3) [sn2]	[M+H]+	546.4	184.1	21	LPC 13:0 (IS)	100
327	LPC(20:4) [sn1]	[M+H]+	544.3	184.1	21	LPC 13:0 (IS)	100
328	LPC(20:4) [sn2]	[M+H]+	544.3	184.1	21	LPC 13:0 (IS)	100
329	LPC(20:5) [sn1]	[M+H]+	542.3	184.1	21	LPC 13:0 (IS)	100
330	LPC(20:5) [sn2]	[M+H]+	542.3	184.1	21	LPC 13:0 (IS)	100
331	LPC(22:0) [sn1]	[M+H]+	580.4	184.1	21	LPC 13:0 (IS)	100
332	LPC(22:0) [sn2]	[M+H]+	580.4	184.1	21	LPC 13:0 (IS)	100
333	LPC(22:1) [sn1]	[M+H]+	578.4	184.1	21	LPC 13:0 (IS)	100
334	LPC(22:1) [sn2]	[M+H]+	578.4	184.1	21	LPC 13:0 (IS)	100
335	LPC(22:4) [sn1]	[M+H]+	572.4	184.1	21	LPC 13:0 (IS)	100
336	LPC(22:4) [sn2]	[M+H]+	572.4	184.1	21	LPC 13:0 (IS)	100
337	LPC(22:5) (n3) [sn1] [104_sn1]	[M+H]+	570.4	104.1	21	LPC 13:0 (IS)	100
338	LPC(22:5) [sn1] (n3)/LPC(22:5) [sn2] (n6)	[M+H]+	570.4	184.1	21	LPC 13:0 (IS)	100
339	LPC(22:5) [sn1] (n6)	[M+H]+	570.4	104.1	21	LPC 13:0 (IS)	100
340	LPC(22:5) [sn2] (n3)	[M+H]+	570.4	184.1	21	LPC 13:0 (IS)	100
341	LPC(22:6) [sn1]	[M+H]+	568.3	184.1	21	LPC 13:0 (IS)	100
342	LPC(22:6) [sn2]	[M+H]+	568.3	184.1	21	LPC 13:0 (IS)	100
343	LPC(24:0) [sn1]	[M+H]+	608.5	184.1	21	LPC 13:0 (IS)	100
344	LPC(24:0) [sn2]	[M+H]+	608.5	184.1	21	LPC 13:0 (IS)	100
345	LPC(26:0) [sn1]	[M+H]+	636.5	184.1	21	LPC 13:0 (IS)	100
346	LPC(26:0) [sn2]	[M+H]+	636.5	184.1	21	LPC 13:0 (IS)	100
347	LPC(O-16:0)	[M+H]+	482.4	104.1	23	LPC 13:0 (IS)	100
348	LPC(O-18:0)	[M+H]+	510.4	104.1	23	LPC 13:0 (IS)	100
349	LPC(O-18:1)	[M+H]+	508.4	104.1	23	LPC 13:0 (IS)	100
350	LPC(O-20:0)	[M+H]+	538.4	104.1	23	LPC 13:0 (IS)	100
351	LPC(O-20:1)	[M+H]+	536.4	104.1	23	LPC 13:0 (IS)	100
352	LPC(O-22:0)	[M+H]+	566.5	104.1	23	LPC 13:0 (IS)	100
353	LPC(O-22:1)	[M+H]+	564.4	104.1	23	LPC 13:0 (IS)	100
354	LPC(O-24:0)	[M+H]+	594.5	104.1	23	LPC 13:0 (IS)	100
355	LPC(O-24:1)	[M+H]+	592.5	104.1	23	LPC 13:0 (IS)	100
356	LPC(O-24:2)	[M+H]+	590.5	104.1	23	LPC 13:0 (IS)	100
357	LPC(P-16:0)	[M+H]+	480.3	104.1	25	LPC 13:0 (IS)	100
358	LPC(P-17:0) (a)	[M+H]+	494.3	104.1	25	LPC 13:0 (IS)	100
359	LPC(P-17:0) (b)	[M+H]+	494.3	104.1	25	LPC 13:0 (IS)	100
360	LPC(P-18:0)	[M+H]+	508.3	104.1	25	LPC 13:0 (IS)	100
361	LPC(P-18:1)	[M+H]+	506.3	104.1	25	LPC 13:0 (IS)	100
362	LPC(P-20:0)	[M+H]+	536.3	104.1	25	LPC 13:0 (IS)	100
363	PE(15-MHDA_18:1)	[M+H]+	732.6	591.5	19	PE 17:0/17:0 (IS)	100
364	PE(15-MHDA_18:2)	[M+H]+	730.5	589.5	19	PE 17:0/17:0 (IS)	100
365	PE(15-MHDA_20:4)	[M+H]+	754.6	613.5	19	PE 17:0/17:0 (IS)	100
366	PE(15-MHDA_22:6)	[M+H]+	778.5	637.5	19	PE 17:0/17:0 (IS)	100
367	PE(16:0_16:0)	[M+H]+	692.5	551.5	19	PE 17:0/17:0 (IS)	100
368	PE(16:0_16:1)	[M+H]+	690.5	549.5	19	PE 17:0/17:0 (IS)	100
369	PE(16:0_18:1)	[M+H]+	718.5	577.5	19	PE 17:0/17:0 (IS)	100
370	PE(16:0_18:2)	[M+H]+	716.5	575.5	19	PE 17:0/17:0 (IS)	100
371	PE(16:0_18:3) (a)	[M+H]+	714.5	573.5	19	PE 17:0/17:0 (IS)	100
372	PE(16:0_18:3) (b)	[M+H]+	714.5	573.5	19	PE 17:0/17:0 (IS)	100
373	PE(16:0_20:3)	[M+H]+	742.5	601.5	19	PE 17:0/17:0 (IS)	100
374	PE(16:0_20:4)	[M+H]+	740.5	599.5	19	PE 17:0/17:0 (IS)	100
375	PE(16:0_20:5)	[M+H]+	738.5	597.5	19	PE 17:0/17:0 (IS)	100
376	PE(16:0_22:6)	[M+H]+	764.5	623.5	19	PE 17:0/17:0 (IS)	100
377	PE(16:1_18:2)	[M+H]+	714.5	573.5	19	PE 17:0/17:0 (IS)	100
378	PE(16:1_20:4)	[M+H]+	738.5	597.5	19	PE 17:0/17:0 (IS)	100
379	PE(17:0_18:1)	[M+H]+	732.6	591.5	19	PE 17:0/17:0 (IS)	100
380	PE(17:0_18:2)	[M+H]+	730.5	589.5	19	PE 17:0/17:0 (IS)	100
381	PE(17:0_20:4)	[M+H]+	754.6	613.5	19	PE 17:0/17:0 (IS)	100
382	PE(17:0_22:6)	[M+H]+	778.5	637.5	19	PE 17:0/17:0 (IS)	100
383	PE(18:0_18:1)	[M+H]+	746.6	605.6	19	PE 17:0/17:0 (IS)	100
384	PE(18:0_18:2)	[M+H]+	744.6	603.5	19	PE 17:0/17:0 (IS)	100
385	PE(18:0_20:3) (a)	[M+H]+	770.6	629.6	19	PE 17:0/17:0 (IS)	100
386	PE(18:0_20:3) (b)	[M+H]+	770.6	629.6	19	PE 17:0/17:0 (IS)	100
387	PE(18:0_20:4)	[M+H]+	768.6	627.5	19	PE 17:0/17:0 (IS)	100
388	PE(18:0_22:4)	[M+H]+	796.6	655.6	19	PE 17:0/17:0 (IS)	100
389	PE(18:0_22:5) (n3)	[M+H]+	794.6	653.6	19	PE 17:0/17:0 (IS)	100
390	PE(18:0_22:5) (n6)	[M+H]+	794.6	653.6	19	PE 17:0/17:0 (IS)	100
391	PE(18:0_22:6)	[M+H]+	792.6	651.5	19	PE 17:0/17:0 (IS)	100
392	PE(18:1_18:1)	[M+H]+	744.6	603.5	19	PE 17:0/17:0 (IS)	100
393	PE(18:1_18:2)	[M+H]+	742.5	601.5	19	PE 17:0/17:0 (IS)	100
394	PE(18:1_22:6) (a)	[M+H]+	790.5	649.5	19	PE 17:0/17:0 (IS)	100
395	PE(18:1_22:6) (b)	[M+H]+	790.5	649.5	19	PE 17:0/17:0 (IS)	100
396	PE(20:0_20:4)	[M+H]+	796.6	655.6	19	PE 17:0/17:0 (IS)	100
397	PE(36:0)	[M+H]+	748.6	607.6	19	PE 17:0/17:0 (IS)	100
398	PE(38:5) (a)	[M+H]+	766.5	625.5	19	PE 17:0/17:0 (IS)	100
399	PE(38:5) (b)	[M+H]+	766.5	625.5	19	PE 17:0/17:0 (IS)	100
400	PE(O-16:0/18:2)	[M+H]+	702.5	561.5	19	PE 17:0/17:0 (IS)	100
401	PE(O-16:0/20:3)	[M+H]+	728.6	587.5	19	PE 17:0/17:0 (IS)	100
402	PE(O-16:0/20:4)	[M+H]+	726.5	585.5	19	PE 17:0/17:0 (IS)	100
403	PE(O-16:0/22:4)	[M+H]+	754.6	613.6	19	PE 17:0/17:0 (IS)	100
404	PE(O-16:0/22:6)	[M+H]+	750.6	609.5	19	PE 17:0/17:0 (IS)	100
405	PE(O-18:0/20:4)	[M+H]+	754.6	613.6	19	PE 17:0/17:0 (IS)	100
406	PE(O-18:0/22:5)	[M+H]+	780.6	639.6	19	PE 17:0/17:0 (IS)	100
407	PE(O-18:0/22:6)	[M+H]+	778.5	637.5	19	PE 17:0/17:0 (IS)	100
408	PE(O-18:1/18:2)	[M+H]+	728.6	587.5	19	PE 17:0/17:0 (IS)	100
409	PE(O-18:1/22:6)	[M+H]+	776.6	635.5	19	PE 17:0/17:0 (IS)	100
410	PE(O-34:1)	[M+H]+	704.6	563.5	19	PE 17:0/17:0 (IS)	100
411	PE(O-36:5)	[M+H]+	724.5	583.5	19	PE 17:0/17:0 (IS)	100
412	PE(O-38:5) (a)	[M+H]+	752.6	611.5	19	PE 17:0/17:0 (IS)	100
413	PE(O-38:5) (b)	[M+H]+	752.6	611.5	19	PE 17:0/17:0 (IS)	100
414	PE(P-15:0/20:4) (a)	[M+H]+	710.5	361.3	19	PE 17:0/17:0 (IS)	100
415	PE(P-15:0/20:4) (b)	[M+H]+	710.5	361.3	19	PE 17:0/17:0 (IS)	100
416	PE(P-15:0/22:6) (a)	[M+H]+	734.5	385.3	19	PE 17:0/17:0 (IS)	100
417	PE(P-15:0/22:6) (b)	[M+H]+	734.5	385.3	19	PE 17:0/17:0 (IS)	100
418	PE(P-16:0/18:1)	[M+H]+	702.5	339.3	19	PE 17:0/17:0 (IS)	100
419	PE(P-16:0/18:2)	[M+H]+	700.5	337.3	19	PE 17:0/17:0 (IS)	100
420	PE(P-16:0/18:3)	[M+H]+	698.5	335.3	19	PE 17:0/17:0 (IS)	100
421	PE(P-16:0/20:3) (a)	[M+H]+	726.5	363.3	19	PE 17:0/17:0 (IS)	100
422	PE(P-16:0/20:3) (b)	[M+H]+	726.5	363.3	19	PE 17:0/17:0 (IS)	100
423	PE(P-16:0/20:4)	[M+H]+	724.5	361.3	19	PE 17:0/17:0 (IS)	100
424	PE(P-16:0/20:5)	[M+H]+	722.5	359.3	19	PE 17:0/17:0 (IS)	100
425	PE(P-16:0/22:4)	[M+H]+	752.6	389.3	19	PE 17:0/17:0 (IS)	100
426	PE(P-16:0/22:5) (n3)	[M+H]+	750.5	387.3	19	PE 17:0/17:0 (IS)	100
427	PE(P-16:0/22:5) (n6)	[M+H]+	750.5	387.3	19	PE 17:0/17:0 (IS)	100
428	PE(P-16:0/22:6)	[M+H]+	748.5	385.3	19	PE 17:0/17:0 (IS)	100
429	PE(P-17:0/20:4) (a)	[M+H]+	738.6	361.3	19	PE 17:0/17:0 (IS)	100
430	PE(P-17:0/20:4) (b)	[M+H]+	738.6	361.3	19	PE 17:0/17:0 (IS)	100
431	PE(P-17:0/22:6) (a)	[M+H]+	762.6	385.3	19	PE 17:0/17:0 (IS)	100
432	PE(P-17:0/22:6) (b)	[M+H]+	762.6	385.3	19	PE 17:0/17:0 (IS)	100
433	PE(P-18:0/18:1)	[M+H]+	730.6	339.3	19	PE 17:0/17:0 (IS)	100
434	PE(P-18:0/18:2)	[M+H]+	728.6	337.3	19	PE 17:0/17:0 (IS)	100
435	PE(P-18:0/18:3)	[M+H]+	726.5	335.3	19	PE 17:0/17:0 (IS)	100
436	PE(P-18:0/20:3) (a)	[M+H]+	754.5	363.3	19	PE 17:0/17:0 (IS)	100
437	PE(P-18:0/20:3) (b)	[M+H]+	754.5	363.3	19	PE 17:0/17:0 (IS)	100
438	PE(P-18:0/20:4)	[M+H]+	752.6	361.3	19	PE 17:0/17:0 (IS)	100
439	PE(P-18:0/20:5)	[M+H]+	750.5	359.3	19	PE 17:0/17:0 (IS)	100
440	PE(P-18:0/22:4)	[M+H]+	780.6	389.3	19	PE 17:0/17:0 (IS)	100
441	PE(P-18:0/22:5) (n3)	[M+H]+	778.5	387.3	19	PE 17:0/17:0 (IS)	100
442	PE(P-18:0/22:5) (n6)	[M+H]+	778.5	387.3	19	PE 17:0/17:0 (IS)	100
443	PE(P-18:0/22:6)	[M+H]+	776.6	385.3	19	PE 17:0/17:0 (IS)	100
444	PE(P-18:1/18:1)	[M+H]+	728.6	339.3	19	PE 17:0/17:0 (IS)	100
445	PE(P-18:1/18:1) (a)	[M+H]+	728.6	339.3	19	PE 17:0/17:0 (IS)	100
446	PE(P-18:1/18:1) (b)	[M+H]+	728.6	339.3	19	PE 17:0/17:0 (IS)	100
447	PE(P-18:1/18:2) (a)	[M+H]+	726.5	337.3	19	PE 17:0/17:0 (IS)	100
448	PE(P-18:1/18:2) (b)	[M+H]+	726.5	337.3	19	PE 17:0/17:0 (IS)	100
449	PE(P-18:1/18:3)	[M+H]+	724.5	335.3	19	PE 17:0/17:0 (IS)	100
450	PE(P-18:1/20:3) (a)	[M+H]+	752.5	363.3	19	PE 17:0/17:0 (IS)	100
451	PE(P-18:1/20:3) (b)	[M+H]+	752.5	363.3	19	PE 17:0/17:0 (IS)	100
452	PE(P-18:1/20:4) (a)	[M+H]+	750.5	361.3	19	PE 17:0/17:0 (IS)	100
453	PE(P-18:1/20:4) (b)	[M+H]+	750.5	361.3	19	PE 17:0/17:0 (IS)	100
454	PE(P-18:1/20:5) (a)	[M+H]+	748.5	359.3	19	PE 17:0/17:0 (IS)	100
455	PE(P-18:1/20:5) (b)	[M+H]+	748.5	359.3	19	PE 17:0/17:0 (IS)	100
456	PE(P-18:1/22:4)	[M+H]+	778.5	389.3	19	PE 17:0/17:0 (IS)	100
457	PE(P-18:1/22:5) (a)	[M+H]+	776.6	387.3	19	PE 17:0/17:0 (IS)	100
458	PE(P-18:1/22:5) (b)	[M+H]+	776.6	387.3	19	PE 17:0/17:0 (IS)	100
459	PE(P-18:1/22:6) (a)	[M+H]+	774.5	385.3	19	PE 17:0/17:0 (IS)	100
460	PE(P-18:1/22:6) (b)	[M+H]+	774.5	385.3	19	PE 17:0/17:0 (IS)	100
461	PE(P-19:0/20:4) (a)	[M+H]+	766.6	361.3	19	PE 17:0/17:0 (IS)	100
462	PE(P-19:0/20:4) (b)	[M+H]+	766.6	361.3	19	PE 17:0/17:0 (IS)	100
463	PE(P-20:0/18:1)	[M+H]+	758.6	339.3	19	PE 17:0/17:0 (IS)	100
464	PE(P-20:0/18:2)	[M+H]+	756.6	337.3	19	PE 17:0/17:0 (IS)	100
465	PE(P-20:0/20:4)	[M+H]+	780.6	361.3	19	PE 17:0/17:0 (IS)	100
466	PE(P-20:0/22:6)	[M+H]+	804.6	385.3	19	PE 17:0/17:0 (IS)	100
467	PE(P-20:1/20:4)	[M+H]+	778.5	361.3	19	PE 17:0/17:0 (IS)	100
468	PE(P-20:1/22:6)	[M+H]+	802.6	385.3	19	PE 17:0/17:0 (IS)	100
469	LPE(16:0) [sn1]	[M+H]+	454.3	313.3	17	LPE 14:0 (IS)	100
470	LPE(16:0) [sn2]	[M+H]+	454.3	313.3	17	LPE 14:0 (IS)	100
471	LPE(17:0) [sn1]	[M+H]+	468.3	327.3	17	LPE 14:0 (IS)	100
472	LPE(17:0) [sn2]	[M+H]+	468.3	327.3	17	LPE 14:0 (IS)	100
473	LPE(18:0) [sn1]	[M+H]+	482.3	341.3	17	LPE 14:0 (IS)	100
474	LPE(18:0) [sn2]	[M+H]+	482.3	341.3	17	LPE 14:0 (IS)	100
475	LPE(18:1) [sn1]	[M+H]+	480.3	339.3	17	LPE 14:0 (IS)	100
476	LPE(18:1) [sn2]	[M+H]+	480.3	339.3	17	LPE 14:0 (IS)	100
477	LPE(18:2) [sn1]	[M+H]+	478.3	337.3	17	LPE 14:0 (IS)	100
478	LPE(18:2) [sn2]	[M+H]+	478.3	337.3	17	LPE 14:0 (IS)	100
479	LPE(20:4) [sn1]	[M+H]+	502.3	361.3	17	LPE 14:0 (IS)	100
480	LPE(20:4) [sn2]	[M+H]+	502.3	361.3	17	LPE 14:0 (IS)	100
481	LPE(22:6) [sn1]	[M+H]+	526.3	385.3	17	LPE 14:0 (IS)	100
482	LPE(22:6) [sn2]	[M+H]+	526.3	385.3	17	LPE 14:0 (IS)	100
483	LPE(P-16:0)	[M+H]+	438.3	266.4	19	LPE 14:0 (IS)	100
484	LPE(P-18:0)	[M+H]+	466.3	294.4	19	LPE 14:0 (IS)	100
485	LPE(P-18:1)	[M+H]+	464.3	292.4	19	LPE 14:0 (IS)	100
486	LPE(P-20:0)	[M+H]+	494.3	322.4	19	LPE 14:0 (IS)	100
487	PI (38:5) (b)	[M+NH4]+	902.6	625.6	17	PE 17:0/17:0 (IS)	100
488	PI(15-MHDA_20:4)\PI(17:0_20:4)	[M+NH4]+	890.6	613.6	17	PE 17:0/17:0 (IS)	100
489	PI(16:0_16:1)	[M+NH4]+	826.5	549.5	17	PE 17:0/17:0 (IS)	100
490	PI(16:0_20:3) (a)	[M+NH4]+	878.6	601.6	17	PE 17:0/17:0 (IS)	100
491	PI(16:0_20:3) (b)	[M+NH4]+	878.6	601.6	17	PE 17:0/17:0 (IS)	100
492	PI(16:0_20:4)	[M+NH4]+	876.6	599.6	17	PE 17:0/17:0 (IS)	100
493	PI(16:0/16:0)	[M+NH4]+	828.6	551.6	17	PE 17:0/17:0 (IS)	100
494	PI(17:0_18:1)	[M+NH4]+	868.6	591.6	17	PE 17:0/17:0 (IS)	100
495	PI(17:0_18:2)	[M+NH4]+	866.6	589.6	17	PE 17:0/17:0 (IS)	100
496	PI(18:0_18:1)	[M+NH4]+	882.6	605.6	17	PE 17:0/17:0 (IS)	100
497	PI(18:0_20:2)	[M+NH4]+	908.6	631.6	17	PE 17:0/17:0 (IS)	100
498	PI(18:0_20:3) (a)	[M+NH4]+	906.6	629.6	17	PE 17:0/17:0 (IS)	100
499	PI(18:0_20:3) (b)	[M+NH4]+	906.6	629.6	17	PE 17:0/17:0 (IS)	100
500	PI(18:0_20:4)	[M+NH4]+	904.6	627.6	17	PE 17:0/17:0 (IS)	100
501	PI(18:0_22:4)	[M+NH4]+	932.6	655.6	17	PE 17:0/17:0 (IS)	100
502	PI(18:0_22:5) (n3)	[M+NH4]+	930.6	653.6	17	PE 17:0/17:0 (IS)	100
503	PI(18:0_22:5) (n6)	[M+NH4]+	930.6	653.6	17	PE 17:0/17:0 (IS)	100
504	PI(18:0_22:6)	[M+NH4]+	928.6	651.6	17	PE 17:0/17:0 (IS)	100
505	PI(18:1_18:2)	[M+NH4]+	878.6	601.6	17	PE 17:0/17:0 (IS)	100
506	PI(20:0_20:4)	[M+NH4]+	932.6	655.6	17	PE 17:0/17:0 (IS)	100
507	PI(34:0)	[M+NH4]+	856.6	579.6	17	PE 17:0/17:0 (IS)	100
508	PI(34:1)	[M+NH4]+	854.6	577.6	17	PE 17:0/17:0 (IS)	100
509	PI(36:2)	[M+NH4]+	880.6	603.6	17	PE 17:0/17:0 (IS)	100
510	PI(37:6)	[M+NH4]+	886.6	609.6	17	PE 17:0/17:0 (IS)	100
511	PI(38:5) (a)	[M+NH4]+	902.6	625.6	17	PE 17:0/17:0 (IS)	100
512	PI(38:6)	[M+NH4]+	900.6	623.6	17	PE 17:0/17:0 (IS)	100
513	PI(39:6)	[M+NH4]+	914.6	637.6	17	PE 17:0/17:0 (IS)	100
514	PIP1(38:4)	[M+NH4]+	984.7	627.7	20	PE 17:0/17:0 (IS)	100
515	LPI(18:0) [sn1]	[M+NH4]+	618.3	341.3	21	LPI 13:0 (IS)	20
516	LPI(18:0) [sn2]	[M+NH4]+	618.3	341.3	21	LPI 13:0 (IS)	20
517	LPI(18:1) [sn1]	[M+NH4]+	616.3	339.3	21	LPI 13:0 (IS)	20
518	LPI(18:1) [sn2]	[M+NH4]+	616.3	339.3	21	LPI 13:0 (IS)	20
519	LPI(18:2) [sn1]	[M+NH4]+	614.3	337.3	21	LPI 13:0 (IS)	20
520	LPI(18:2) [sn2]	[M+NH4]+	614.3	337.3	21	LPI 13:0 (IS)	20
521	LPI(20:4) [sn1]	[M+NH4]+	638.3	361.3	21	LPI 13:0 (IS)	20
522	LPI(20:4) [sn2]	[M+NH4]+	638.3	361.3	21	LPI 13:0 (IS)	20
523	PS(36:1)	[M+H]+	790.6	605.6	23	PS 17:0 17:0 (IS)	50
524	PS(36:2)	[M+H]+	788.5	603.5	23	PS 17:0 17:0 (IS)	50
525	PS(38:3)	[M+H]+	814.6	629.6	23	PS 17:0 17:0 (IS)	50
526	PS(38:4)	[M+H]+	812.5	627.5	23	PS 17:0 17:0 (IS)	50
527	PS(38:5)	[M+H]+	810.5	625.5	23	PS 17:0 17:0 (IS)	50
528	PS(40:5)	[M+H]+	838.6	653.6	23	PS 17:0 17:0 (IS)	50
529	PS(40:6)	[M+H]+	836.5	651.5	23	PS 17:0 17:0 (IS)	50
530	PG(34:1)	[M+NH4]+	766.6	577.5	17	PG 17:0 17:0 (IS)	50
531	PG(36:1)	[M+NH4]+	794.6	605.6	17	PG 17:0 17:0 (IS)	50
532	PG(36:2)	[M+NH4]+	792.6	603.5	17	PG 17:0 17:0 (IS)	50
533	CE(14:0)	[M+NH4]+	614.6	369.3	10	CE 18:0-d6 (IS)	1000
534	CE(15:0)	[M+NH4]+	628.6	369.3	10	CE 18:0-d6 (IS)	1000
535	CE(16:0)	[M+NH4]+	642.6	369.3	10	CE 18:0-d6 (IS)	1000
536	CE(16:1)	[M+NH4]+	640.6	369.3	10	CE 18:0-d6 (IS)	1000
537	CE(16:2)	[M+NH4]+	638.6	369.3	10	CE 18:0-d6 (IS)	1000
538	CE(17:0)	[M+NH4]+	656.6	369.3	10	CE 18:0-d6 (IS)	1000
539	CE(17:1)	[M+NH4]+	654.6	369.3	10	CE 18:0-d6 (IS)	1000
540	CE(18:0)	[M+NH4]+	670.7	369.3	10	CE 18:0-d6 (IS)	1000
541	CE(18:1)	[M+NH4]+	668.6	369.3	10	CE 18:0-d6 (IS)	1000
542	CE(18:2)	[M+NH4]+	666.6	369.3	10	CE 18:0-d6 (IS)	1000
543	CE(18:3)	[M+NH4]+	664.6	369.3	10	CE 18:0-d6 (IS)	1000
544	CE(20:0)	[M+NH4]+	698.7	369.3	10	CE 18:0-d6 (IS)	1000
545	CE(20:1)	[M+NH4]+	696.7	369.3	10	CE 18:0-d6 (IS)	1000
546	CE(20:2)	[M+NH4]+	694.7	369.3	10	CE 18:0-d6 (IS)	1000
547	CE(20:3)	[M+NH4]+	692.6	369.3	10	CE 18:0-d6 (IS)	1000
548	CE(20:4)	[M+NH4]+	690.6	369.3	10	CE 18:0-d6 (IS)	1000
549	CE(20:5)	[M+NH4]+	688.6	369.3	10	CE 18:0-d6 (IS)	1000
550	CE(22:0)	[M+NH4]+	726.7	369.3	10	CE 18:0-d6 (IS)	1000
551	CE(22:1)	[M+NH4]+	724.7	369.3	10	CE 18:0-d6 (IS)	1000
552	CE(22:4)	[M+NH4]+	718.7	369.3	10	CE 18:0-d6 (IS)	1000
553	CE(22:5) (n3)	[M+NH4]+	716.6	369.3	10	CE 18:0-d6 (IS)	1000
554	CE(22:5) (n6)	[M+NH4]+	716.6	369.3	10	CE 18:0-d6 (IS)	1000
555	CE(22:6)	[M+NH4]+	714.6	369.3	10	CE 18:0-d6 (IS)	1000
556	CE(24:0)	[M+NH4]+	754.7	369.3	10	CE 18:0-d6 (IS)	1000
557	CE(24:1)	[M+NH4]+	752.7	369.3	10	CE 18:0-d6 (IS)	1000
558	CE(24:4)	[M+NH4]+	746.7	369.3	10	CE 18:0-d6 (IS)	1000
559	CE(24:5)	[M+NH4]+	744.7	369.3	10	CE 18:0-d6 (IS)	1000
560	CE(24:6)	[M+NH4]+	742.7	369.3	10	CE 18:0-d6 (IS)	1000
561	COH	[M+NH4]+	369.4	161.2	19	COH-d7 (IS)	10000
562	DE(16:0)	[M+NH4]+	640.8	367.4	10	CE 18:0-d6 (IS)	1000
563	DE(18:1)	[M+NH4]+	666.8	367.4	10	CE 18:0-d6 (IS)	1000
564	DE(18:2)	[M+NH4]+	664.8	367.4	10	CE 18:0-d6 (IS)	1000
565	DE(20:4)	[M+NH4]+	688.8	367.4	10	CE 18:0-d6 (IS)	1000
566	DE(20:5)	[M+NH4]+	686.8	367.4	10	CE 18:0-d6 (IS)	1000
567	DE(22:6)	[M+NH4]+	712.8	367.4	10	CE 18:0-d6 (IS)	1000
568	FA(14:0)	[M+H]-	227.2	227.2	0	FA(18:1) d9 (IS)	200
569	FA(15:0)	[M+H]-	241.2	241.2	0	FA(18:1) d9 (IS)	200
570	FA(16:0)	[M+H]-	255.2	255.2	0	FA(18:1) d9 (IS)	200
571	FA(16:1)	[M+H]-	253.2	253.2	0	FA(18:1) d9 (IS)	200
572	FA(16:2)	[M+H]-	251.2	251.2	0	FA(18:1) d9 (IS)	200
573	FA(17:0)	[M+H]-	269.3	269.2	0	FA(18:1) d9 (IS)	200
574	FA(17:1)	[M+H]-	267.2	267.2	0	FA(18:1) d9 (IS)	200
575	FA(18:0)	[M+H]-	283.3	283.3	0	FA(18:1) d9 (IS)	200
576	FA(18:1)	[M+H]-	281.3	281.2	0	FA(18:1) d9 (IS)	200
577	FA(18:2)	[M+H]-	279.2	279.2	0	FA(18:1) d9 (IS)	200
578	FA(18:3)	[M+H]-	277.2	277.2	0	FA(18:1) d9 (IS)	200
579	FA(20:2)	[M+H]-	307.3	307.3	0	FA(18:1) d9 (IS)	200
580	FA(20:3)	[M+H]-	305.3	305.2	0	FA(18:1) d9 (IS)	200
581	FA(20:4)	[M+H]-	303.2	303.2	0	FA(18:1) d9 (IS)	200
582	FA(20:5)	[M+H]-	301.2	301.2	0	FA(18:1) d9 (IS)	200
583	FA(22:4)	[M+H]-	331.3	331.3	0	FA(18:1) d9 (IS)	200
584	FA(22:5)	[M+H]-	329.3	329.2	0	FA(18:1) d9 (IS)	200
585	FA(22:6)	[M+H]-	327.2	327.2	0	FA(18:1) d9 (IS)	200
586	AC(12:0)	[M+H]+	344.3	85.1	30	AcylCarnitine 16:0 d3 (IS)	10
587	AC(13:0)	[M+H]+	358.3	85.1	30	AcylCarnitine 16:0 d3 (IS)	10
588	AC(14:0)	[M+H]+	372.3	85.1	30	AcylCarnitine 16:0 d3 (IS)	10
589	AC(14:1)	[M+H]+	370.3	85.1	30	AcylCarnitine 16:0 d3 (IS)	10
590	AC(14:2)	[M+H]+	368.3	85.1	30	AcylCarnitine 16:0 d3 (IS)	10
591	AC(15:0) (a)	[M+H]+	386.3	85.1	30	AcylCarnitine 16:0 d3 (IS)	10
592	AC(15:0) (b)	[M+H]+	386.3	85.1	30	AcylCarnitine 16:0 d3 (IS)	10
593	AC(16:0)	[M+H]+	400.4	85.1	30	AcylCarnitine 16:0 d3 (IS)	10
594	AC(16:1)	[M+H]+	398.3	85.1	30	AcylCarnitine 16:0 d3 (IS)	10
595	AC(17:0) (a)	[M+H]+	414.4	85.1	30	AcylCarnitine 16:0 d3 (IS)	10
596	AC(17:0) (b)	[M+H]+	414.4	85.1	30	AcylCarnitine 16:0 d3 (IS)	10
597	AC(18:0)	[M+H]+	428.4	85.1	30	AcylCarnitine 16:0 d3 (IS)	10
598	AC(18:1)	[M+H]+	426.4	85.1	30	AcylCarnitine 16:0 d3 (IS)	10
599	AC(18:2)	[M+H]+	424.3	85.1	30	AcylCarnitine 16:0 d3 (IS)	10
600	DG(14:0_16:0)	[M+H]+	558.5	313.3	25	DG 15:0 15:0 (IS)	200
601	DG(14:0_18:2)	[M+H]+	582.5	285.2	25	DG 15:0 15:0 (IS)	200
602	DG(16:0_16:0)	[M+H]+	586.5	313.2	25	DG 15:0 15:0 (IS)	200
603	DG(16:0_16:1)	[M+H]+	584.5	313.2	25	DG 15:0 15:0 (IS)	200
604	DG(16:0_18:1)	[M+H]+	612.6	313.3	25	DG 15:0 15:0 (IS)	200
605	DG(16:0_18:2)	[M+H]+	610.5	313.2	25	DG 15:0 15:0 (IS)	200
606	DG(16:0_20:4)	[M+H]+	634.5	313.2	25	DG 15:0 15:0 (IS)	200
607	DG(16:0_22:5)	[M+H]+	660.6	313.3	25	DG 15:0 15:0 (IS)	200
608	DG(16:0_22:6)	[M+H]+	658.5	313.2	25	DG 15:0 15:0 (IS)	200
609	DG(16:1_18:1)	[M+H]+	610.5	339.2	25	DG 15:0 15:0 (IS)	200
610	DG(18:0_18:1)	[M+H]+	640.6	341.3	25	DG 15:0 15:0 (IS)	200
611	DG(18:0_18:2)	[M+H]+	638.6	341.3	25	DG 15:0 15:0 (IS)	200
612	DG(18:0_20:4)	[M+H]+	662.6	341.3	25	DG 15:0 15:0 (IS)	200
613	DG(18:0_22:6)	[M+H]+	658.5	313.2	25	DG 15:0 15:0 (IS)	200
614	DG(18:1_18:1)	[M+H]+	638.6	339.3	25	DG 15:0 15:0 (IS)	200
615	DG(18:1_18:2)	[M+H]+	636.6	339.3	25	DG 15:0 15:0 (IS)	200
616	DG(18:1_18:3)	[M+H]+	634.5	339.2	25	DG 15:0 15:0 (IS)	200
617	DG(18:1_20:3)	[M+H]+	662.6	339.3	25	DG 15:0 15:0 (IS)	200
618	DG(18:1_20:4)	[M+H]+	660.6	339.3	25	DG 15:0 15:0 (IS)	200
619	DG(18:1_20:5)	[M+H]+	658.6	339.3	25	DG 15:0 15:0 (IS)	200
620	DG(18:1_22:5)	[M+H]+	686.6	339.3	25	DG 15:0 15:0 (IS)	200
621	DG(18:1_22:6)	[M+H]+	684.6	339.3	25	DG 15:0 15:0 (IS)	200
622	DG(18:2_18:2)	[M+H]+	634.5	337.2	25	DG 15:0 15:0 (IS)	200
623	DG(18:2_20:4)	[M+H]+	658.5	337.2	25	DG 15:0 15:0 (IS)	200
624	DG(18:2_22:6)	[M+H]+	682.6	337.3	25	DG 15:0 15:0 (IS)	200
625	TG(48:0) [SIM]	[M+H]+	824.8	824.8	0	TG(51:0) [NL-17:0] (IS)	100
626	TG(48:1) [SIM]	[M+H]+	822.8	822.8	0	TG(51:0) [NL-17:0] (IS)	100
627	TG(48:2) [SIM]	[M+H]+	820.8	820.8	0	TG(51:0) [NL-17:0] (IS)	100
628	TG(48:3) [SIM]	[M+H]+	818.8	818.8	0	TG(51:0) [NL-17:0] (IS)	100
629	TG(49:1) [SIM]	[M+H]+	836.8	836.8	0	TG(51:0) [NL-17:0] (IS)	100
630	TG(50:0) [SIM]	[M+H]+	852.8	852.8	0	TG(51:0) [NL-17:0] (IS)	100
631	TG(50:1) [SIM]	[M+H]+	850.8	850.8	0	TG(51:0) [NL-17:0] (IS)	100
632	TG(50:2) [SIM]	[M+H]+	848.8	848.8	0	TG(51:0) [NL-17:0] (IS)	100
633	TG(50:3) [SIM]	[M+H]+	846.8	846.8	0	TG(51:0) [NL-17:0] (IS)	100
634	TG(50:4) [SIM]	[M+H]+	844.8	844.8	0	TG(51:0) [NL-17:0] (IS)	100
635	TG(51:0) [SIM]	[M+H]+	866.7	866.7	0	TG(51:0) [NL-17:0] (IS)	100
636	TG(51:1) [SIM]	[M+H]+	864.8	864.8	0	TG(51:0) [NL-17:0] (IS)	100
637	TG(51:2) [SIM]	[M+H]+	862.8	862.8	0	TG(51:0) [NL-17:0] (IS)	100
638	TG(52:1) [SIM]	[M+H]+	878.8	878.8	0	TG(51:0) [NL-17:0] (IS)	100
639	TG(52:2) [SIM]	[M+H]+	876.8	876.8	0	TG(51:0) [NL-17:0] (IS)	100
640	TG(52:3) [SIM]	[M+H]+	874.8	874.8	0	TG(51:0) [NL-17:0] (IS)	100
641	TG(52:4) [SIM]	[M+H]+	872.8	872.8	0	TG(51:0) [NL-17:0] (IS)	100
642	TG(52:5) [SIM]	[M+H]+	870.8	870.8	0	TG(51:0) [NL-17:0] (IS)	100
643	TG(53:2) [SIM]	[M+H]+	890.8	890.8	0	TG(51:0) [NL-17:0] (IS)	100
644	TG(54:0) [SIM]	[M+H]+	908.8	908.8	0	TG(51:0) [NL-17:0] (IS)	100
645	TG(54:1) [SIM]	[M+H]+	906.8	906.8	0	TG(51:0) [NL-17:0] (IS)	100
646	TG(54:2) [SIM]	[M+H]+	904.8	904.8	0	TG(51:0) [NL-17:0] (IS)	100
647	TG(54:3) [SIM]	[M+H]+	902.8	902.8	0	TG(51:0) [NL-17:0] (IS)	100
648	TG(54:4) [SIM]	[M+H]+	900.8	900.8	0	TG(51:0) [NL-17:0] (IS)	100
649	TG(54:5) [SIM]	[M+H]+	898.8	898.8	0	TG(51:0) [NL-17:0] (IS)	100
650	TG(54:6) [SIM]	[M+H]+	896.8	896.8	0	TG(51:0) [NL-17:0] (IS)	100
651	TG(54:7) [SIM]	[M+H]+	894.8	894.8	0	TG(51:0) [NL-17:0] (IS)	100
652	TG(56:6) [SIM]	[M+H]+	924.8	924.8	0	TG(51:0) [NL-17:0] (IS)	100
653	TG(56:7) [SIM]	[M+H]+	922.8	922.8	0	TG(51:0) [NL-17:0] (IS)	100
654	TG(56:8) [SIM]	[M+H]+	920.8	920.8	0	TG(51:0) [NL-17:0] (IS)	100
655	TG(56:9) [SIM]	[M+H]+	918.8	918.8	0	TG(51:0) [NL-17:0] (IS)	100
656	TG(58:10) [SIM]	[M+H]+	944.9	944.9	0	TG(51:0) [NL-17:0] (IS)	100
657	TG(58:8) [SIM]	[M+H]+	948.8	948.8	0	TG(51:0) [NL-17:0] (IS)	100
658	TG(58:9) [SIM]	[M+H]+	946.9	946.9	0	TG(51:0) [NL-17:0] (IS)	100
659	TG(48:0) [NL-16:0]	[M+H]+	824.8	551.5	25	TG(51:0) [NL-17:0] (IS)	100
660	TG(48:0) [NL-18:0]	[M+H]+	824.8	523.5	25	TG(51:0) [NL-17:0] (IS)	100
661	TG(48:1) [NL-16:1]	[M+H]+	822.8	551.5	25	TG(51:0) [NL-17:0] (IS)	100
662	TG(48:1) [NL-18:1]	[M+H]+	822.8	523.5	25	TG(51:0) [NL-17:0] (IS)	100
663	TG(48:2) [NL-14:0]	[M+H]+	820.8	575.5	25	TG(51:0) [NL-17:0] (IS)	100
664	TG(48:2) [NL-14:1]	[M+H]+	820.8	577.5	25	TG(51:0) [NL-17:0] (IS)	100
665	TG(48:2) [NL-16:1]	[M+H]+	820.8	549.5	25	TG(51:0) [NL-17:0] (IS)	100
666	TG(48:2) [NL-18:2]	[M+H]+	820.8	523.5	25	TG(51:0) [NL-17:0] (IS)	100
667	TG(48:3) [NL-14:0]	[M+H]+	818.8	573.5	25	TG(51:0) [NL-17:0] (IS)	100
668	TG(48:3) [NL-16:1]	[M+H]+	818.8	547.5	25	TG(51:0) [NL-17:0] (IS)	100
669	TG(48:3) [NL-18:3]	[M+H]+	818.8	523.5	25	TG(51:0) [NL-17:0] (IS)	100
670	TG(49:1) [NL-16:1]	[M+H]+	836.8	565.5	25	TG(51:0) [NL-17:0] (IS)	100
671	TG(49:1) [NL-17:1]	[M+H]+	836.8	551.5	25	TG(51:0) [NL-17:0] (IS)	100
672	TG(50:0) [NL-18:0]	[M+H]+	852.8	551.5	25	TG(51:0) [NL-17:0] (IS)	100
673	TG(50:1) [NL-14:0]	[M+H]+	850.8	605.5	25	TG(51:0) [NL-17:0] (IS)	100
674	TG(50:1) [NL-16:0]	[M+H]+	850.8	577.5	25	TG(51:0) [NL-17:0] (IS)	100
675	TG(50:1) [NL-18:1]	[M+H]+	850.8	551.5	25	TG(51:0) [NL-17:0] (IS)	100
676	TG(50:2) [NL-14:0]	[M+H]+	848.8	603.5	25	TG(51:0) [NL-17:0] (IS)	100
677	TG(50:2) [NL-16:1]	[M+H]+	848.8	577.5	25	TG(51:0) [NL-17:0] (IS)	100
678	TG(50:2) [NL-18:1]	[M+H]+	848.8	549.5	25	TG(51:0) [NL-17:0] (IS)	100
679	TG(50:2) [NL-18:2]	[M+H]+	848.8	551.5	25	TG(51:0) [NL-17:0] (IS)	100
680	TG(50:3) [NL-14:0]	[M+H]+	846.8	601.5	25	TG(51:0) [NL-17:0] (IS)	100
681	TG(50:3) [NL-14:1]	[M+H]+	846.8	603.5	25	TG(51:0) [NL-17:0] (IS)	100
682	TG(50:3) [NL-16:1]	[M+H]+	846.8	575.5	25	TG(51:0) [NL-17:0] (IS)	100
683	TG(50:3) [NL-18:2]	[M+H]+	846.8	549.5	25	TG(51:0) [NL-17:0] (IS)	100
684	TG(50:3) [NL-18:3]	[M+H]+	846.8	551.5	25	TG(51:0) [NL-17:0] (IS)	100
685	TG(50:4) [NL-14:0]	[M+H]+	844.8	599.5	25	TG(51:0) [NL-17:0] (IS)	100
686	TG(50:4) [NL-18:3]	[M+H]+	844.8	549.5	25	TG(51:0) [NL-17:0] (IS)	100
687	TG(50:4) [NL-20:4]	[M+H]+	844.8	523.5	25	TG(51:0) [NL-17:0] (IS)	100
688	TG(51:0) [NL-16:0]	[M+H]+	866.7	593.4	25	TG(51:0) [NL-17:0] (IS)	100
689	TG(51:1) [NL-17:0]	[M+H]+	864.8	577.5	25	TG(51:0) [NL-17:0] (IS)	100
690	TG(51:2) [NL-15:0]	[M+H]+	862.8	603.5	25	TG(51:0) [NL-17:0] (IS)	100
691	TG(51:2) [NL-17:0]	[M+H]+	862.8	575.5	25	TG(51:0) [NL-17:0] (IS)	100
692	TG(51:2) [NL-17:1]	[M+H]+	862.8	577.5	25	TG(51:0) [NL-17:0] (IS)	100
693	TG(52:1) [NL-18:0]	[M+H]+	878.8	577.5	25	TG(51:0) [NL-17:0] (IS)	100
694	TG(52:1) [NL-18:1]	[M+H]+	878.8	579.5	25	TG(51:0) [NL-17:0] (IS)	100
695	TG(52:2) [NL-16:0]	[M+H]+	876.8	603.5	25	TG(51:0) [NL-17:0] (IS)	100
696	TG(52:2) [NL-18:2]	[M+H]+	876.8	579.5	25	TG(51:0) [NL-17:0] (IS)	100
697	TG(52:3) [NL-16:1]	[M+H]+	874.8	603.5	25	TG(51:0) [NL-17:0] (IS)	100
698	TG(52:3) [NL-18:2]	[M+H]+	874.8	577.5	25	TG(51:0) [NL-17:0] (IS)	100
699	TG(52:4) [NL-16:1]	[M+H]+	872.8	601.5	25	TG(51:0) [NL-17:0] (IS)	100
700	TG(52:4) [NL-18:2]	[M+H]+	872.8	575.5	25	TG(51:0) [NL-17:0] (IS)	100
701	TG(52:4) [NL-18:3]	[M+H]+	872.8	577.5	25	TG(51:0) [NL-17:0] (IS)	100
702	TG(52:5) [NL-18:3]	[M+H]+	870.8	575.5	25	TG(51:0) [NL-17:0] (IS)	100
703	TG(52:5) [NL-20:4]	[M+H]+	870.8	549.5	25	TG(51:0) [NL-17:0] (IS)	100
704	TG(52:5) [NL-20:5]	[M+H]+	870.8	551.5	25	TG(51:0) [NL-17:0] (IS)	100
705	TG(53:2) [NL-17:1]	[M+H]+	890.8	605.5	25	TG(51:0) [NL-17:0] (IS)	100
706	TG(53:2) [NL-18:1]	[M+H]+	890.8	591.5	25	TG(51:0) [NL-17:0] (IS)	100
707	TG(54:0) [NL-18:0]	[M+H]+	908.8	607.5	25	TG(51:0) [NL-17:0] (IS)	100
708	TG(54:1) [NL-18:1]	[M+H]+	906.8	607.5	25	TG(51:0) [NL-17:0] (IS)	100
709	TG(54:2) [NL-18:0]	[M+H]+	904.8	603.5	25	TG(51:0) [NL-17:0] (IS)	100
710	TG(54:2) [NL-20:1]	[M+H]+	904.8	577.5	25	TG(51:0) [NL-17:0] (IS)	100
711	TG(54:3) [NL-18:1]	[M+H]+	902.8	603.5	25	TG(51:0) [NL-17:0] (IS)	100
712	TG(54:3) [NL-18:2]	[M+H]+	902.8	605.5	25	TG(51:0) [NL-17:0] (IS)	100
713	TG(54:4) [NL-18:2]	[M+H]+	900.8	603.5	25	TG(51:0) [NL-17:0] (IS)	100
714	TG(54:4) [NL-20:3]	[M+H]+	900.8	577.5	25	TG(51:0) [NL-17:0] (IS)	100
715	TG(54:5) [NL-18:3]	[M+H]+	898.8	603.5	25	TG(51:0) [NL-17:0] (IS)	100
716	TG(54:5) [NL-20:4]	[M+H]+	898.8	577.5	25	TG(51:0) [NL-17:0] (IS)	100
717	TG(54:6) [NL-18:3]	[M+H]+	896.8	601.5	25	TG(51:0) [NL-17:0] (IS)	100
718	TG(54:6) [NL-20:4]	[M+H]+	896.8	575.5	25	TG(51:0) [NL-17:0] (IS)	100
719	TG(54:6) [NL-20:5]	[M+H]+	896.8	577.5	25	TG(51:0) [NL-17:0] (IS)	100
720	TG(54:6) [NL-22:6]	[M+H]+	896.8	551.5	25	TG(51:0) [NL-17:0] (IS)	100
721	TG(54:7) [NL-20:5]	[M+H]+	894.8	575.5	25	TG(51:0) [NL-17:0] (IS)	100
722	TG(54:7) [NL-22:6]	[M+H]+	894.8	549.5	25	TG(51:0) [NL-17:0] (IS)	100
723	TG(56:6) [NL-20:4]	[M+H]+	924.8	603.5	25	TG(51:0) [NL-17:0] (IS)	100
724	TG(56:6) [NL-22:5](a)	[M+H]+	924.8	577.5	25	TG(51:0) [NL-17:0] (IS)	100
725	TG(56:6) [NL-22:5](b)	[M+H]+	924.8	577.5	25	TG(51:0) [NL-17:0] (IS)	100
726	TG(56:7) [NL-20:4]	[M+H]+	922.8	601.5	25	TG(51:0) [NL-17:0] (IS)	100
727	TG(56:7) [NL-20:5]	[M+H]+	922.8	603.5	25	TG(51:0) [NL-17:0] (IS)	100
728	TG(56:7) [NL-22:5](a)	[M+H]+	922.8	575.5	25	TG(51:0) [NL-17:0] (IS)	100
729	TG(56:7) [NL-22:5](b)	[M+H]+	922.8	575.5	25	TG(51:0) [NL-17:0] (IS)	100
730	TG(56:7) [NL-22:6]	[M+H]+	922.8	577.5	25	TG(51:0) [NL-17:0] (IS)	100
731	TG(56:8) [NL-20:4]	[M+H]+	920.8	599.5	25	TG(51:0) [NL-17:0] (IS)	100
732	TG(56:8) [NL-20:5]	[M+H]+	920.8	601.5	25	TG(51:0) [NL-17:0] (IS)	100
733	TG(56:8) [NL-22:6]	[M+H]+	920.8	575.5	25	TG(51:0) [NL-17:0] (IS)	100
734	TG(56:9) [NL-22:6]	[M+H]+	918.8	573.5	25	TG(51:0) [NL-17:0] (IS)	100
735	TG(58:10) [NL-22:6]	[M+H]+	944.9	599.5	25	TG(51:0) [NL-17:0] (IS)	100
736	TG(58:8) [NL-22:6]	[M+H]+	948.8	603.5	25	TG(51:0) [NL-17:0] (IS)	100
737	TG(58:9) [NL-22:6]	[M+H]+	946.9	601.5	25	TG(51:0) [NL-17:0] (IS)	100
738	TG(O-50:1) [SIM]	[M+H]+	836.8	836.8	0	TG(51:0) [NL-17:0] (IS)	100
739	TG(O-50:2) [SIM]	[M+H]+	834.8	834.8	0	TG(51:0) [NL-17:0] (IS)	100
740	TG(O-50:3) [SIM]	[M+H]+	832.8	832.8	0	TG(51:0) [NL-17:0] (IS)	100
741	TG(O-52:0) [SIM]	[M+H]+	866.8	866.8	0	TG(51:0) [NL-17:0] (IS)	100
742	TG(O-52:1) [SIM]	[M+H]+	864.8	864.8	0	TG(51:0) [NL-17:0] (IS)	100
743	TG(O-52:2) [SIM]	[M+H]+	862.8	862.8	0	TG(51:0) [NL-17:0] (IS)	100
744	TG(O-54:2) [SIM]	[M+H]+	890.8	890.8	0	TG(51:0) [NL-17:0] (IS)	100
745	TG(O-54:3) [SIM]	[M+H]+	888.8	888.8	0	TG(51:0) [NL-17:0] (IS)	100
746	TG(O-54:4) [SIM]	[M+H]+	886.8	886.8	0	TG(51:0) [NL-17:0] (IS)	100
747	TG(O-50:1) [NL-15:0]	[M+H]+	836.8	577.5	25	TG(51:0) [NL-17:0] (IS)	100
748	TG(O-50:1) [NL-16:0]	[M+H]+	836.8	563.5	25	TG(51:0) [NL-17:0] (IS)	100
749	TG(O-50:1) [NL-17:1]	[M+H]+	836.8	551.5	25	TG(51:0) [NL-17:0] (IS)	100
750	TG(O-50:1) [NL-18:1]	[M+H]+	836.8	537.5	25	TG(51:0) [NL-17:0] (IS)	100
751	TG(O-50:2) [NL-16:1]	[M+H]+	834.8	563.5	25	TG(51:0) [NL-17:0] (IS)	100
752	TG(O-50:2) [NL-18:1]	[M+H]+	834.8	535.5	25	TG(51:0) [NL-17:0] (IS)	100
753	TG(O-50:2) [NL-18:2]	[M+H]+	834.8	537.5	25	TG(51:0) [NL-17:0] (IS)	100
754	TG(O-50:3) [NL-18:2]	[M+H]+	832.8	535.5	25	TG(51:0) [NL-17:0] (IS)	100
755	TG(O-52:0) [NL-16:0]	[M+H]+	866.8	593.5	25	TG(51:0) [NL-17:0] (IS)	100
756	TG(O-52:1) [NL-16:0]	[M+H]+	864.8	591.5	25	TG(51:0) [NL-17:0] (IS)	100
757	TG(O-52:1) [NL-18:1]	[M+H]+	864.8	565.5	25	TG(51:0) [NL-17:0] (IS)	100
758	TG(O-52:2) [NL-16:0]	[M+H]+	862.8	589.5	25	TG(51:0) [NL-17:0] (IS)	100
759	TG(O-52:2) [NL-17:1]	[M+H]+	862.8	577.5	25	TG(51:0) [NL-17:0] (IS)	100
760	TG(O-52:2) [NL-18:1]	[M+H]+	862.8	563.5	25	TG(51:0) [NL-17:0] (IS)	100
761	TG(O-54:2) [NL-17:1]	[M+H]+	890.8	605.5	25	TG(51:0) [NL-17:0] (IS)	100
762	TG(O-54:2) [NL-18:1]	[M+H]+	890.8	591.5	25	TG(51:0) [NL-17:0] (IS)	100
763	TG(O-54:3) [NL-17:1]	[M+H]+	888.8	603.5	25	TG(51:0) [NL-17:0] (IS)	100
764	TG(O-54:3) [NL-18:1]	[M+H]+	888.8	589.5	25	TG(51:0) [NL-17:0] (IS)	100
765	TG(O-54:4) [NL-17:1]	[M+H]+	886.8	601.5	25	TG(51:0) [NL-17:0] (IS)	100
766	TG(O-54:4) [NL-18:2]	[M+H]+	886.8	589.5	25	TG(51:0) [NL-17:0] (IS)	100
767	Ubiquinone	[M+H]+	880.7	197	17	Hex3Cer(d18:1/17:0) (IS)	25
768	CE(18:2) [+OH]	[M+H]+	682.6	369.3	10	CE 18:0-d6 (IS)	1000
769	CE(20:4) [+OH]	[M+H]+	706.6	369.3	10	CE 18:0-d6 (IS)	1000
770	CE(22:6) [+OH]	[M+H]+	730.6	369.3	10	CE 18:0-d6 (IS)	1000
771	LPC(18:2) [+OH]	[M+H]+	536.3	184.1	21	LPC 13:0 (IS)	100
772	LPC(20:4) [+OH]	[M+H]+	560.3	184.1	21	LPC 13:0 (IS)	100
773	LPC(22:6) [+OH]	[M+H]+	584.3	184.1	21	LPC 13:0 (IS)	100
774	PC(34:2) [+OH]	[M+H]+	774.6	184.1	25	PC 13:0 13:0 (IS)	100
775	PC(36:4) [+OH]	[M+H]+	798.6	184.1	25	PC 13:0 13:0 (IS)	100
776	PC(38:6) [+OH]	[M+H]+	822.6	184.1	25	PC 13:0 13:0 (IS)	100

## Sheet: 1B
	1B. Cohort charactersitcs
	28w antenatal maternal data								Birth data
	Lipidomics samples	1032							Lipidomics samples	893		Male	468	Twins	14
	Total cholesterol (mmol/L)	6.17 (1.18)							Labour duration (hours)	7.74 (6.66)
	Total HDL-cholesterol (mmol/L)	2.05 (0.38)							Gestational age (days)	276.5 (9.76)
	Total LDL-cholesterol (mmol/L)	2.19 (0.67)							Birth weight (kg)	3.55 (0.486)
	Total triglycerides (mmol/L)	2.19 (0.75)							Total cholesterol (mmol/L)	1.33 (0.41)
	Age (y)	31.4 (4.7)							Total HDL-cholesterol (mmol/L)	0.85 (0.21)
	Smoking	none		<10cpd		>10cpd			Total LDL-cholesterol (mmol/L)	0.16 (0.15)
		862		47		11			Total triglycerides (mmol/L)	0.38 (0.17)
	Education	<y10	y10	y12	Dipl	Bach	Postgr		Mode of birth	Unassisted Vaginal Birth			Forceps Vaginal Birth
		12	73	152	260	343	187			448			81
	Gestational Diabetes Mellitus	no			yes					Vacuum Vaginal Birth			Scheduled CS
		836			44					106			154
	Birth Order	1st	2nd	3rd	4th	5+				Unscheduled CS			Unknown
		473	367	128	34	7				103			1
	Pre-pregnancy BMI (kg)	25.7 (5.57)							1st visit data
	Gestational weight gain (kg)	10.0 (6.49)							Age (days)	1.16 (1.73)
	Daily energy intake (kJ)	7431.9 (2350.03)							Weight (kg)	3.531 (0.51)
	Daily fat intake (g)	74.3 (26.8)							Length/Height (cm)	50.88 (2.34)
									BMI	13.6 (1.38)
	Children data
	Timepoint	06m		12m		48m
	Age at interview (days)	198.32 (12.34)		395.89 (24.38)		1520.96 (69.70)
	Weight (kg)	7.94 (1.02)		10.12 (1.24)		17.68 (2.48)
	Length/Height (cm)	67.94 (2.94)		75.86 (3.04)		106.25 (4.72)
	BMI	17.19 (1.73)		17.69 (1.72)		15.61 (1.43)
	Formula start (weeks)	10.1 (12.78)
	Breastfeeding	none		<4 weeks		1-6 months
		22		113		255
		6-12 months		>12 months
		210		366
	Any breastfeeding (weeks)	22.3 (17.0)
	Exclusive breastfeeding (weeks)	12.4 (15.26)

## Sheet: 1C
1C: Association of gestational age, birth weight and gender with lipid species at birth
		Gestational age					Birth weight
Lipid #	Lipid species	Percent difference 1	95% Lower CL2	95% Upper CL2	p-value	p-value (BH)3	Percent difference 4	95% Lower CL2	95% Upper CL2	p-value	p-value (BH)3
1	Sph(d16:1)	0.0647799	-0.185934	0.316123	0.61235	0.679024	-1.69719	-6.21874	3.04237	0.475531	0.605364
2	Sph(d18:1)	0.278557	-0.43216	0.994347	0.442733	0.509176	-1.63175	-13.9255	12.4179	0.808842	0.874363
3	Sph(d18:2)	0.0682638	-0.0493016	0.185967	0.254705	0.316948	-1.67531	-3.82108	0.518335	0.133163	0.232135
4	S1P(d16:1)	-0.374299	-0.647823	-0.100023	0.00759321	0.0142649	1.6388	-3.47316	7.02149	0.536383	0.658985
5	S1P(d18:0)	0.0825868	-0.391823	0.559256	0.733052	0.781857	10.7576	1.30734	21.0894	0.0248153	0.0589174
6	S1P(d18:1)	-0.257277	-0.77094	0.259045	0.327535	0.392433	9.91409	-0.23815	21.0995	0.0558897	0.113242
7	S1P(d18:2)	-0.3203	-0.657697	0.0182428	0.0636198	0.0943329	12.2426	5.32192	19.618	0.000394631	0.00158261
8	Cer(d18:0/16:0)	-0.127429	-0.437305	0.18341	0.420634	0.485926	1.36163	-4.38152	7.44973	0.648999	0.762253
9	Cer(d18:0/18:0)	-0.227233	-0.621649	0.168749	0.259785	0.322234	4.5457	-2.94514	12.6147	0.240743	0.368251
10	Cer(d18:0/20:0)	-0.405813	-0.693854	-0.116936	0.00600703	0.0114518	6.58685	0.947017	12.5418	0.0215408	0.052595
11	Cer(d18:0/22:0)	-0.702932	-1.02352	-0.381304	2.14209e-05	6.02901e-05	12.6969	6.05983	19.7494	0.00012216	0.000580071
12	Cer(d18:0/24:0)	-0.249427	-0.628843	0.131438	0.198578	0.256593	7.41905	0.00365613	15.3843	0.0498834	0.102959
13	Cer(d18:0/24:1)	-1.46425	-1.85914	-1.06778	1.67609e-12	1.01351e-11	11.1587	3.08822	19.8609	0.00602315	0.0175921
14	Cer(d16:1/16:0)	-0.389656	-0.78034	0.00256679	0.0515103	0.0791051	0.169972	-6.95295	7.83816	0.963949	0.975289
15	Cer(d16:1/18:0)	0.247561	-0.195995	0.693087	0.273924	0.335379	-2.84197	-10.6014	5.59098	0.496576	0.622789
16	Cer(d16:1/20:0)	0.401536	0.0139174	0.790657	0.0423327	0.0660595	-4.67203	-11.3481	2.50676	0.196078	0.314634
17	Cer(d16:1/22:0)	-0.0571694	-0.403775	0.290642	0.74659	0.792676	-2.41871	-8.5788	4.15646	0.461146	0.597868
18	Cer(d16:1/23:0)	0.234276	-0.058872	0.528283	0.117158	0.159088	-6.00744	-11.0353	-0.695449	0.0272585	0.0631679
19	Cer(d16:1/24:0)	0.0347388	-0.274787	0.345226	0.825853	0.862004	-4.10175	-9.52083	1.6419	0.157852	0.266763
20	Cer(d16:1/24:1)	-1.13147	-1.48455	-0.777128	8.0364e-10	3.93682e-09	4.72187	-2.07948	11.9956	0.177727	0.291442
21	Cer(d17:1/16:0)	0.0959031	-0.251013	0.444026	0.587847	0.654667	-3.18878	-9.29649	3.33022	0.329123	0.465063
22	Cer(d17:1/18:0)	-0.0221307	-0.313404	0.269994	0.881613	0.905405	-2.52036	-7.7152	2.9669	0.360323	0.498018
23	Cer(d17:1/20:0)	0.353981	0.0227878	0.686271	0.0362091	0.0576664	-2.74961	-8.60044	3.47575	0.377857	0.516716
24	Cer(d17:1/22:0)	0.0826568	-0.206209	0.372359	0.574735	0.641911	-1.87109	-7.05312	3.59984	0.494397	0.621206
25	Cer(d17:1/23:0)	0.474717	0.150804	0.799677	0.00411441	0.00814464	-7.82961	-13.25	-2.07049	0.00846162	0.0236437
26	Cer(d17:1/24:0)	0.232425	-0.0462235	0.51185	0.101992	0.141982	-5.14599	-9.9752	-0.0577275	0.0475295	0.0991586
27	Cer(d17:1/24:1)	-0.534888	-0.859146	-0.209571	0.00132578	0.00286636	-1.58217	-7.4331	4.6386	0.60951	0.728026
28	Cer(d18:1/14:0)	0.232168	-0.12622	0.591843	0.204053	0.26279	-2.96093	-9.27078	3.78774	0.380306	0.518233
29	Cer(d18:1/16:0)	-0.174777	-0.513406	0.165005	0.312394	0.378393	0.0773208	-6.10635	6.66824	0.98102	0.988684
30	Cer(d18:1/17:0)	-0.411047	-0.775079	-0.0456801	0.0275558	0.0449015	8.24977	1.05901	15.9522	0.0238754	0.0572122
31	Cer(d18:1/18:0)	0.246934	-0.134886	0.630214	0.204827	0.26335	-0.991826	-7.83553	6.36006	0.784709	0.85665
32	Cer(d18:1/19:0)	0.605975	0.249551	0.963666	0.000880604	0.00194185	-2.32847	-8.62298	4.39963	0.487574	0.616637
33	Cer(d18:1/20:0)	0.0281173	-0.323339	0.380813	0.8754	0.90101	1.46626	-5.02059	8.39613	0.665375	0.773838
34	Cer(d18:1/21:0)	0.550321	0.181271	0.920731	0.00350615	0.00704873	-7.63702	-13.7968	-1.03713	0.0241441	0.0575001
35	Cer(d18:1/22:0)	-0.396407	-0.730008	-0.0616855	0.0203989	0.0344732	8.17182	1.5701	15.2026	0.0145803	0.0380903
36	Cer(d18:1/23:0)	0.400682	0.0172938	0.78554	0.0405363	0.0636411	-4.23856	-10.8743	2.89121	0.236695	0.364944
37	Cer(d18:1/24:0)	-0.0621324	-0.381593	0.258352	0.703153	0.75694	3.97391	-2.09048	10.4139	0.203317	0.320505
38	Cer(d18:1/24:1)	-1.13674	-1.50704	-0.765044	3.79928e-09	1.66138e-08	7.37468	0.0717283	15.2106	0.0477204	0.0992893
39	Cer(d18:1/26:0)	0.441263	0.128235	0.755269	0.00577646	0.0110668	0.0846814	-5.61067	6.12369	0.977373	0.986293
40	Cer(d18:2/14:0)	-0.0970396	-0.369182	0.175846	0.484813	0.552129	0.452565	-4.56122	5.72974	0.862548	0.910794
41	Cer(d18:2/16:0)	-0.677087	-1.04254	-0.310288	0.000320256	0.000751146	5.85209	-1.22419	13.4353	0.106984	0.192572
42	Cer(d18:2/17:0)	0.341206	-0.253974	0.939939	0.26126	0.323461	1.50677	-9.21825	13.4989	0.792616	0.861636
43	Cer(d18:2/18:0)	0.0126156	-0.391858	0.418731	0.95127	0.961205	1.69295	-5.75537	9.72993	0.664834	0.773838
44	Cer(d18:2/20:0)	-0.201655	-0.570585	0.168643	0.284856	0.347757	3.67206	-3.29009	11.1354	0.308694	0.444934
45	Cer(d18:2/21:0)	0.15214	-0.0819217	0.386749	0.202431	0.261136	-2.16044	-6.36437	2.23223	0.329102	0.465063
46	Cer(d18:2/22:0)	-0.603811	-0.947252	-0.259179	0.000630736	0.00142329	6.64972	-0.0588183	13.8086	0.0521042	0.106973
47	Cer(d18:2/23:0)	0.105224	-0.292444	0.504478	0.604011	0.670738	-4.00213	-10.913	3.44483	0.2834	0.416227
48	Cer(d18:2/24:0)	-0.060755	-0.441362	0.321307	0.754532	0.798916	1.55279	-5.46608	9.09279	0.672784	0.777216
49	Cer(d18:2/24:1)	-1.28767	-1.64135	-0.932714	3.82371e-12	2.2592e-11	9.19652	2.08194	16.8069	0.0105741	0.0286167
50	Cer(d18:2/26:0)	0.477629	0.114579	0.841996	0.00996826	0.0179867	-3.04089	-9.40983	3.77581	0.372407	0.511069
51	Cer(d19:1/16:0)	0.233807	-0.229471	0.699237	0.322554	0.387665	0.581787	-7.79491	9.71949	0.895802	0.930627
52	Cer(d19:1/18:0)	0.0333759	-0.452376	0.521498	0.892942	0.912995	-3.84783	-12.2436	5.35119	0.399319	0.534728
53	Cer(d19:1/20:0)	0.048789	-0.252197	0.350683	0.750629	0.795873	-2.26952	-7.64307	3.41668	0.425623	0.55836
54	Cer(d19:1/22:0)	-0.265862	-0.606124	0.0755651	0.126577	0.170681	2.8278	-3.56119	9.64006	0.393574	0.531313
55	Cer(d19:1/23:0)	0.655764	0.248813	1.06437	0.00161045	0.00342441	-6.95337	-13.7664	0.397933	0.0631821	0.125714
56	Cer(d19:1/24:0)	0.406324	0.0490489	0.764874	0.025846	0.0425634	-1.26892	-7.6587	5.56303	0.707902	0.797549
57	Cer(d19:1/24:1)	-0.95035	-1.37336	-0.525523	1.39296e-05	3.97841e-05	0.0712963	-7.65332	8.44206	0.986104	0.992515
58	Cer(d19:1/26:0)	0.328325	-0.0104701	0.668269	0.057501	0.0865871	-2.13541	-8.15581	4.27963	0.50458	0.629134
59	Cer(d20:1/22:0)	-0.465639	-0.764296	-0.166083	0.00238852	0.00491679	6.46123	0.6225	12.6388	0.0296468	0.0674901
60	Cer(d20:1/23:0)	0.159052	-0.183966	0.503248	0.363279	0.428839	1.35787	-4.96313	8.09928	0.680951	0.783144
61	Cer(d20:1/24:0)	0.239611	-0.0835151	0.563782	0.145987	0.194293	3.67481	-2.42167	10.1522	0.242657	0.369717
62	Cer(d20:1/24:1)	-1.22819	-1.57901	-0.876122	2.24684e-11	1.27872e-10	9.44277	2.37221	17.0017	0.00818249	0.02303
63	Cer(d20:1/26:0)	0.617196	0.297349	0.938063	0.00016263	0.000395835	-4.10999	-9.67272	1.79531	0.168346	0.277989
64	Cer(m18:0/20:0)	-0.0526083	-0.420627	0.316771	0.77945	0.821927	-4.45788	-10.8495	2.39199	0.196341	0.314634
65	Cer(m18:0/22:0)	0.00131945	-0.363063	0.367035	0.994338	0.994338	-2.14082	-8.62146	4.79943	0.535299	0.658698
66	Cer(m18:0/23:0)	0.641586	0.27371	1.01081	0.000645958	0.00145341	-9.73209	-15.7283	-3.30923	0.00357104	0.0111004
67	Cer(m18:0/24:0)	0.301939	-0.0665972	0.671834	0.108249	0.148819	-4.84342	-11.1961	1.9637	0.158707	0.267624
68	Cer(m18:0/24:1)	-0.246727	-0.661549	0.169827	0.244783	0.306572	-4.51932	-11.703	3.24878	0.246022	0.372644
69	Cer(m18:1/18:0)	-0.576994	-0.992339	-0.159906	0.00682614	0.0129179	-8.32396	-15.2519	-0.829735	0.0302348	0.0686268
70	Cer(m18:1/20:0)	-0.442927	-0.818777	-0.0656527	0.0215126	0.0361974	-10.1902	-16.3452	-3.58233	0.00306777	0.0097714
71	Cer(m18:1/22:0)	-0.488863	-0.90725	-0.0687092	0.0227034	0.0380356	-7.76288	-14.7763	-0.172241	0.0452263	0.0961679
72	Cer(m18:1/23:0)	0.544055	0.0635163	1.0269	0.0265065	0.0434662	-15.9854	-23.2107	-8.08038	0.000157141	0.000711271
73	Cer(m18:1/24:0)	-0.305722	-0.70206	0.0921987	0.131673	0.177243	-8.55999	-15.1476	-1.46095	0.0190731	0.0469317
74	Cer(m18:1/24:1)	-0.992297	-1.40485	-0.578021	3.38944e-06	1.06293e-05	-7.26234	-14.2531	0.298413	0.0593382	0.118984
75	Cer1P(d18:1/16:0)	0.374767	-0.0347887	0.786001	0.0728699	0.106217	5.58709	-2.21289	14.0092	0.164653	0.274067
76	HexCer(d16:1/18:0)	-0.767906	-1.28784	-0.245235	0.00409633	0.00812963	-0.576556	-9.91239	9.72675	0.90835	0.937417
77	HexCer(d16:1/20:0)	-0.915651	-1.41053	-0.418288	0.00033461	0.000782441	-3.23241	-11.9126	6.30311	0.492571	0.619918
78	HexCer(d16:1/22:0)	-0.506419	-0.920468	-0.0906403	0.0171125	0.0293032	-0.51502	-8.0053	7.58512	0.896961	0.930627
79	HexCer(d16:1/24:0)	-0.308725	-0.681367	0.0653144	0.105429	0.145717	-3.2591	-9.82581	3.78581	0.354945	0.493227
80	HexCer(d18:1/16:0)	-0.279252	-0.629137	0.0718659	0.118689	0.160886	7.96809	1.07495	15.3313	0.0228275	0.055387
81	HexCer(d18:1/18:0)	-0.987623	-1.4201	-0.553252	1.01292e-05	2.99236e-05	1.14167	-6.83637	9.80292	0.786216	0.857086
82	HexCer(d18:1/20:0)	-1.02393	-1.3968	-0.649647	1.22592e-07	4.69732e-07	5.82682	-1.41114	13.5962	0.116948	0.208087
83	HexCer(d18:1/22:0)	-0.471733	-0.823669	-0.118549	0.00897618	0.0165813	6.13496	-0.692377	13.4317	0.0791357	0.152366
84	HexCer(d18:1/24:0)	-0.0182383	-0.367926	0.332677	0.918596	0.934289	4.48967	-2.16087	11.5923	0.190168	0.308575
85	HexCer(d18:1/24:1)	-0.432511	-0.775426	-0.0884108	0.0138885	0.0243757	8.99649	2.16194	16.2883	0.00921231	0.0252848
86	HexCer(d18:2/18:0)	-1.45137	-1.91921	-0.981293	2.8306e-09	1.26641e-08	7.79211	-1.41839	17.8632	0.0994995	0.181633
87	HexCer(d18:2/20:0)	-1.11197	-1.64415	-0.576915	5.34703e-05	0.000141249	13.2238	2.3175	25.2926	0.0163355	0.0420055
88	HexCer(d18:2/22:0)	-0.886497	-1.25569	-0.515923	3.46151e-06	1.07599e-05	8.89794	1.53088	16.7996	0.017163	0.0439874
89	HexCer(d18:2/24:0)	-0.385564	-0.725524	-0.0444392	0.0268424	0.043924	4.97116	-1.553	11.9277	0.138095	0.238584
90	Hex2Cer(d16:1/16:0)	0.837209	0.464918	1.21088	1.1397e-05	3.31628e-05	-2.96176	-9.4703	4.01471	0.395392	0.531313
91	Hex2Cer(d16:1/24:1)	-0.607439	-1.03939	-0.1736	0.00618915	0.01177	8.22626	-0.269364	17.4456	0.0580264	0.116656
92	Hex2Cer(d18:1/16:0)	0.777157	0.406694	1.14899	4.18065e-05	0.000111966	3.78585	-3.14619	11.214	0.291511	0.426521
93	Hex2Cer(d18:1/18:0)	-0.618021	-0.998831	-0.235747	0.00159581	0.00340263	-8.02318	-14.4179	-1.15061	0.0229995	0.0554567
94	Hex2Cer(d18:1/20:0)	-0.120093	-0.509456	0.270794	0.545928	0.615439	4.16766	-3.1961	12.0916	0.274478	0.406985
95	Hex2Cer(d18:1/22:0)	0.136694	-0.247121	0.521985	0.485074	0.552129	4.60829	-2.66674	12.4271	0.22011	0.344869
96	Hex2Cer(d18:1/24:0)	0.145071	-0.295102	0.587186	0.518314	0.586513	-1.93247	-9.7148	6.52067	0.643161	0.757696
97	Hex2Cer(d18:1/24:1)	0.0842672	-0.339988	0.510329	0.697095	0.751465	9.33748	0.95797	18.4125	0.0282775	0.0649458
98	Hex2Cer(d18:2/16:0)	0.68656	0.343286	1.03101	9.32104e-05	0.000235	3.24233	-3.16812	10.0772	0.328657	0.465063
99	Hex2Cer(d18:2/24:1)	-0.717347	-1.06179	-0.371702	5.37781e-05	0.000141579	12.1965	5.1112	19.7594	0.000569218	0.00219191
100	Hex3Cer(d18:1/16:0)	0.345719	0.0845891	0.60753	0.00952047	0.0173385	1.94028	-2.92556	7.05001	0.440613	0.577047
101	Hex3Cer(d18:1/18:0)	-0.0342232	-0.406974	0.339923	0.857251	0.889427	-0.395048	-7.14012	6.83997	0.911758	0.938163
102	Hex3Cer(d18:1/20:0)	0.479157	0.0823825	0.877504	0.0179759	0.0305788	-1.37067	-8.43012	6.23302	0.715253	0.800008
103	Hex3Cer(d18:1/22:0)	0.413006	0.0767203	0.750421	0.0161266	0.0277996	1.86595	-4.35045	8.48636	0.564398	0.688757
104	Hex3Cer(d18:1/24:0)	0.463578	0.095951	0.832555	0.0134992	0.0237495	-1.03152	-7.61264	6.0184	0.767378	0.840099
105	Hex3Cer(d18:1/24:1)	0.00315322	-0.33123	0.338659	0.985254	0.988722	3.20653	-3.08202	9.90312	0.324532	0.465063
106	GM3(d18:1/16:0)	-0.270994	-0.510401	-0.0310118	0.0269731	0.0440446	7.3416	2.6067	12.295	0.00213606	0.00703536
107	GM3(d18:1/18:0)	-0.128033	-0.414722	0.159482	0.381776	0.447369	-0.831503	-6.04065	4.66644	0.761295	0.835805
108	GM3(d18:1/20:0)	0.150883	-0.173036	0.475854	0.361064	0.427315	5.03242	-1.16395	11.6173	0.11331	0.203013
109	GM3(d18:1/22:0)	-0.0529582	-0.433121	0.328656	0.784949	0.826163	10.1522	2.54813	18.3201	0.00814864	0.0230184
110	GM3(d18:1/24:0)	-0.11508	-0.512654	0.284081	0.570905	0.638556	6.80372	-0.899643	15.1059	0.0847091	0.160698
111	GM3(d18:1/24:1)	-0.559286	-0.983161	-0.133596	0.0101606	0.018289	9.36239	0.936038	18.4922	0.0287547	0.0658465
112	GM1(d18:1/16:0)	0.0489195	-0.179669	0.278031	0.674688	0.73241	5.34106	0.914034	9.96229	0.0176196	0.0443896
113	Sulfatide (d18:1:/16:0(OH))	0.0240418	-0.372832	0.422496	0.905511	0.924625	-6.77214	-13.4759	0.451014	0.0654569	0.129049
114	Sulfatide (d18:1:/16:0)	-0.212883	-0.59383	0.169524	0.274283	0.335379	-4.32485	-10.9529	2.7966	0.226971	0.352762
115	Sulfatide (d18:1:/24:0(OH))	0.0146881	-0.255769	0.285879	0.915202	0.933144	0.422901	-4.55368	5.65896	0.870519	0.915464
116	Sulfatide (d18:1:/24:0)	-0.439926	-0.831204	-0.0471041	0.0282668	0.0459633	-6.69733	-13.3449	0.460196	0.0659779	0.129611
117	Sulfatide (d18:1:/24:1(OH))	-0.390421	-0.799872	0.0207187	0.0626474	0.0931124	-3.78078	-10.9396	3.95347	0.327956	0.465063
118	Sulfatide (d18:1:/24:1)	-0.927147	-1.3606	-0.49179	3.47089e-05	9.49283e-05	-3.82269	-11.4212	4.42761	0.352684	0.492395
119	SM(34:3)	-0.450297	-0.74825	-0.151451	0.00323025	0.00654506	6.75086	0.91057	12.9292	0.0229394	0.0554567
120	SM(35:2) (b)	-0.487965	-1.09253	0.120297	0.115441	0.157309	8.10331	-3.58077	21.2033	0.18145	0.296292
121	SM(37:1)	0.0509599	-0.326823	0.430174	0.79149	0.831226	-2.9355	-9.58884	4.20745	0.410225	0.545536
122	SM(37:2)	0.197315	-0.188297	0.584417	0.315781	0.380708	-1.43586	-8.31753	5.96235	0.694861	0.790915
123	SM(38:3) (a)	-0.290966	-0.64096	0.0602602	0.10416	0.144739	1.24141	-5.22494	8.14895	0.713653	0.800008
124	SM(38:3) (b)	-0.58372	-0.959846	-0.206165	0.00252544	0.00515749	6.39893	-0.908139	14.2448	0.0873917	0.163175
125	SM(40:3) (a)	-0.49533	-0.866168	-0.123105	0.00923284	0.0169342	6.28089	-0.912642	13.9967	0.0883359	0.164301
126	SM(40:3) (b)	-0.19571	-0.540094	0.149866	0.266117	0.328508	-2.45671	-8.58436	4.08169	0.451769	0.589662
127	SM(41:0)	0.337964	-0.00673794	0.683854	0.0546424	0.0827655	2.52166	-3.89125	9.36248	0.449223	0.587329
128	SM(41:1) (a)	1.60603	1.19756	2.01614	3.56311e-14	2.6841e-13	-4.30091	-11.2699	3.21547	0.253952	0.381668
129	SM(43:1)	1.30818	0.946105	1.67155	2.96748e-12	1.76679e-11	-7.92093	-13.9056	-1.52021	0.0161839	0.0417545
130	SM(43:2) (b)	-0.154145	-0.475411	0.168158	0.347552	0.413219	0.0316622	-5.84009	6.26957	0.991803	0.994372
131	SM(43:2) (c)	0.925128	0.556656	1.29495	9.96111e-07	3.42662e-06	-5.78858	-12.0395	0.90658	0.0885686	0.164301
132	SM(44:1)	0.44229	0.117155	0.768481	0.00772044	0.0144688	-2.01588	-7.80115	4.13239	0.5113	0.635226
133	SM(44:2)	-0.380324	-0.685318	-0.0743929	0.0149536	0.0259508	5.20222	-0.681669	11.4347	0.0840488	0.159837
134	SM(44:3)	-0.311428	-0.604674	-0.0173166	0.0380076	0.0602825	2.96955	-2.56967	8.8237	0.299057	0.432655
135	SM(d16:1/19:0)	0.352936	0.0209763	0.685998	0.0371977	0.0591192	-4.33181	-10.1004	1.80698	0.162499	0.271651
136	SM(d16:1/23:0)/SM(d17:1/22:0)	0.214485	-0.121645	0.551746	0.210896	0.270254	-1.68533	-7.69386	4.71432	0.596764	0.716117
137	SM(d16:1/24:1)	-0.781877	-1.15391	-0.408439	4.64091e-05	0.000123439	10.6065	3.0758	18.6874	0.00515391	0.0153428
138	SM(d17:1/14:0)	-0.0257555	-0.33131	0.280735	0.868785	0.896922	-3.5489	-8.93433	2.15501	0.217257	0.34109
139	SM(d17:1/16:0)	-0.0693551	-0.377365	0.239607	0.659083	0.721542	-3.72071	-9.14088	2.02279	0.199223	0.317281
140	SM(d17:1/24:1)	0.137556	-0.188937	0.465117	0.408753	0.472908	-0.29317	-6.22151	6.00994	0.925086	0.947112
141	SM(d18:0/14:0)	-0.592328	-0.922106	-0.261452	0.000480059	0.00110915	10.9543	4.24525	18.0951	0.00112582	0.00409101
142	SM(d18:0/16:0)	-0.68621	-0.943359	-0.428394	2.53405e-07	9.29551e-07	10.0173	4.7917	15.5036	0.000129522	0.000603915
143	SM(d18:0/22:0)	-0.401369	-0.680963	-0.120988	0.00512224	0.00996134	15.5098	9.5729	21.7684	1.15481e-07	1.02738e-06
144	SM(d18:1/14:0/SM(d16:1/16:0)	-0.397051	-0.6948	-0.0984082	0.00928764	0.0169944	1.00513	-4.51427	6.84358	0.726808	0.808839
145	SM(d18:1/16:0)	-0.43051	-0.774756	-0.0850704	0.0147115	0.0255881	3.71024	-2.81718	10.6761	0.271498	0.404893
146	SM(d18:1/17:0)/SM(d17:1/18:0)	0.0335352	-0.279864	0.347919	0.833847	0.86747	-4.26128	-9.73723	1.54687	0.146997	0.251161
147	SM(d18:1/18:0/SM(d16:1/20:0)	-0.805158	-1.19277	-0.416026	5.68206e-05	0.000148578	9.88518	2.09941	18.2647	0.0120239	0.0322024
148	SM(d18:1/20:0)/SM(d16:1/22:0)	-0.475698	-0.810516	-0.139751	0.00562576	0.0108048	9.88776	3.15238	17.0629	0.00354669	0.0110691
149	SM(d18:1/22:0)/SM(d16:1/24:0)	-0.312469	-0.599898	-0.0242096	0.0336944	0.0542192	9.67634	3.89034	15.7846	0.00086891	0.00324897
150	SM(d18:1/23:0)/SM(d17:1/24:0)	0.0802443	-0.245548	0.407101	0.629169	0.693699	-0.0358846	-5.97044	6.27322	0.990814	0.994372
151	SM(d18:1/24:0)	0.0923374	-0.20774	0.393317	0.546262	0.615439	4.43206	-1.29067	10.4866	0.131251	0.22932
152	SM(d18:1/24:1)	-1.00145	-1.34167	-0.660057	1.49907e-08	6.2718e-08	12.3412	5.31165	19.8399	0.000436504	0.00173259
153	SM(d18:2/14:0)	-0.555085	-0.863423	-0.245788	0.000464254	0.00107585	8.15183	2.02802	14.6432	0.00849826	0.0236606
154	SM(d18:2/16:0)	-0.71037	-1.04598	-0.373618	4.0619e-05	0.000109544	10.2723	3.48224	17.5079	0.00262184	0.0085265
155	SM(d18:2/17:0)	-0.0447688	-0.40376	0.315517	0.806983	0.846348	-2.21188	-8.59788	4.62029	0.515642	0.639424
156	SM(d18:2/18:0)	-0.689306	-1.04952	-0.327781	0.000203176	0.000488379	9.09399	1.90127	16.7944	0.0124675	0.0332752
157	SM(d18:2/18:1)	-0.470043	-0.838192	-0.100528	0.012795	0.022714	5.08957	-1.97168	12.6595	0.161527	0.27061
158	SM(d18:2/20:0)	-0.794483	-1.15916	-0.42846	2.44404e-05	6.82919e-05	14.1507	6.52653	22.3205	0.000186647	0.000816185
159	SM(d18:2/22:0)	-0.450242	-0.83829	-0.060676	0.0236166	0.0392258	12.7631	4.79225	21.3402	0.00136157	0.0048342
160	SM(d18:2/23:0)	0.176595	-0.191909	0.54646	0.347455	0.413219	-0.0392923	-6.72021	7.12013	0.991101	0.994372
161	SM(d18:2/24:0)	-0.0835345	-0.408657	0.242649	0.614741	0.6807	3.42372	-2.7137	9.94833	0.280248	0.412379
162	SM(d19:1/24:1)	-0.420086	-0.801552	-0.0371537	0.0316331	0.0510083	1.59231	-5.46913	9.18123	0.66686	0.773838
163	PA(34:1)	0.383205	-0.296718	1.06776	0.269493	0.330567	-1.881	-13.6323	11.4692	0.770118	0.841909
164	PA(36:1)	0.551736	-0.0765448	1.18397	0.0852212	0.12103	0.747913	-10.4343	13.3263	0.901049	0.933617
165	PA(36:2)	0.553893	-0.100291	1.21236	0.0970301	0.135807	-2.28618	-13.5531	10.4493	0.710956	0.798952
166	PA(36:3)	0.720474	-0.0460007	1.49283	0.0654367	0.096289	-4.06468	-16.8797	10.726	0.569988	0.693437
167	PA(36:4)	0.538594	-0.147114	1.22901	0.123731	0.167426	-8.16465	-19.2353	4.42342	0.193348	0.313078
168	PA(40:6)	1.16991	0.68978	1.65232	1.99468e-06	6.56971e-06	-10.1118	-17.79	-1.71652	0.0193664	0.0474355
169	PC(14:0_16:0)	-0.880406	-1.29125	-0.467854	3.33775e-05	9.16107e-05	2.14084	-5.51975	10.4226	0.593801	0.713668
170	PC(14:0_20:4)	-0.340353	-0.672617	-0.0069768	0.0454168	0.0707295	8.29919	1.71898	15.3051	0.0127609	0.0339413
171	PC(14:0_22:6)	0.299147	-0.0474869	0.646983	0.0906911	0.12786	1.33366	-5.04178	8.13714	0.688991	0.786547
172	PC(15-MHDA_18:1)	0.816327	0.412598	1.22168	7.77427e-05	0.000197937	-4.49026	-11.4196	2.98111	0.231399	0.358206
173	PC(15-MHDA_18:2)	0.313365	-0.159826	0.788798	0.194248	0.251839	-8.97404	-16.7045	-0.526137	0.0378894	0.0823776
174	PC(15-MHDA_20:4)	0.977883	0.621928	1.3351	9.07388e-08	3.56507e-07	-10.5813	-16.3161	-4.45354	0.00097657	0.00361658
175	PC(15-MHDA_22:6)	2.37576	1.93916	2.81422	6.87806e-25	3.54908e-23	-19.1853	-25.4149	-12.4354	2.54751e-07	2.09763e-06
176	PC(15:0_20:3)	0.145769	-0.168745	0.461275	0.36346	0.428839	-1.78298	-7.41398	4.19049	0.549764	0.673287
177	PC(15:0_20:4)	0.260378	-0.0910546	0.613046	0.146347	0.194293	-3.44274	-9.60148	3.13558	0.296923	0.430372
178	PC(15:0_22:6)	1.2157	0.822582	1.61035	1.94081e-09	8.99513e-09	-10.799	-17.0824	-4.03956	0.00221945	0.00727903
179	PC(16:0_16:0)	-1.04033	-1.45455	-0.624374	1.26099e-06	4.28072e-06	-2.63225	-10.0041	5.34345	0.506035	0.629696
180	PC(16:0_18:0)	-0.603789	-0.919145	-0.287428	0.000199685	0.000482989	0.288079	-5.51888	6.45194	0.924569	0.947112
181	PC(16:0_18:1)	-0.570592	-0.848165	-0.292243	6.57299e-05	0.000169583	9.64717	4.04203	15.5543	0.00060706	0.0023146
182	PC(16:0_18:2)	-0.482721	-0.764606	-0.200034	0.000858604	0.00189874	0.475961	-4.73367	5.97049	0.861016	0.910794
183	PC(16:0_18:3) (a)	-0.264476	-0.685661	0.158496	0.219554	0.278581	-1.70597	-9.21183	6.42042	0.670672	0.775934
184	PC(16:0_18:3) (b)	-1.1013	-1.50141	-0.69956	1.16517e-07	4.48677e-07	16.8312	8.27104	26.068	6.71036e-05	0.000337261
185	PC(16:0_20:3) (a)	-0.656167	-0.970756	-0.34058	5.19909e-05	0.000137811	11.3728	4.93593	18.2044	0.000410689	0.00163852
186	PC(16:0_20:3) (b)	-1.86727	-2.32896	-1.4034	1.97632e-14	1.52967e-13	44.0331	31.8318	57.3636	3.28488e-15	1.49559e-13
187	PC(16:0_20:4)	-0.097722	-0.256349	0.0611574	0.22739	0.286645	0.464143	-2.48817	3.50584	0.76054	0.835805
188	PC(16:0_20:5)	-0.224374	-0.688439	0.241859	0.344374	0.411336	-9.42982	-17.0183	-1.14742	0.0265933	0.0623128
189	PC(16:0_22:6)	0.706555	0.435201	0.978642	4.04166e-07	1.4618e-06	-3.24698	-8.02494	1.77919	0.201017	0.318174
190	PC(16:1_18:2)	-0.638532	-1.03073	-0.244783	0.00154461	0.00330255	2.10289	-5.2022	9.97089	0.582127	0.703587
191	PC(16:1_20:4)	-0.739148	-1.06421	-0.413013	1.06505e-05	3.13442e-05	11.4977	4.83981	18.5784	0.00055525	0.00214882
192	PC(16:1_22:6)	0.141046	-0.186208	0.469373	0.398067	0.461925	-0.810592	-6.72132	5.47468	0.794821	0.862821
193	PC(17:0_18:1)	0.31258	-0.0210023	0.647276	0.0662486	0.0971144	-2.68528	-8.58334	3.59331	0.392869	0.531313
194	PC(17:0_18:2)	0.0720233	-0.356938	0.502831	0.742144	0.789651	-6.44309	-13.6906	1.41299	0.105288	0.190404
195	PC(17:0_20:4)	0.847093	0.52929	1.1659	2.14101e-07	7.92892e-07	-11.2157	-16.3229	-5.79688	8.99113e-05	0.000440451
196	PC(17:0_22:6)	1.96236	1.57683	2.34935	3.93231e-22	1.11371e-20	-16.4293	-22.1653	-10.2706	9.3617e-07	6.64767e-06
197	PC(17:1_18:2)	-0.0768718	-0.44501	0.292628	0.682546	0.739902	-7.574	-13.7606	-0.943645	0.0259386	0.0612089
198	PC(18:0_18:1)	-0.520106	-0.817679	-0.221641	0.000672793	0.00150503	14.4192	8.16286	21.0374	3.17227e-06	2.0808e-05
199	PC(18:0_18:2)	-0.447816	-0.750782	-0.143925	0.00396846	0.00793691	1.13425	-4.48922	7.08882	0.698751	0.792291
200	PC(18:0_20:3)	-0.195879	-0.47626	0.0852928	0.171581	0.223575	8.71359	3.12187	14.6085	0.00197861	0.00665846
201	PC(18:0_20:4)	0.0872306	-0.175734	0.350888	0.515348	0.584011	-1.03882	-5.80688	3.9706	0.678051	0.782133
202	PC(18:0_22:4)	0.763486	0.454457	1.07347	1.48413e-06	4.9944e-06	3.64397	-2.16251	9.79505	0.223237	0.348458
203	PC(18:0_22:5) (n3)	1.63484	1.22357	2.04779	1.91421e-14	1.49656e-13	-6.36811	-13.2299	1.03629	0.0900434	0.166333
204	PC(18:0_22:5) (n6)	0.0217362	-0.411377	0.456733	0.921678	0.936193	23.3583	13.7086	33.827	5.56844e-07	4.30943e-06
205	PC(18:0_22:6)	1.36083	1.01079	1.71209	6.98249e-14	5.00412e-13	-5.50238	-11.4435	0.837268	0.0874577	0.163175
206	PC(18:1_18:1)	-0.82269	-1.14465	-0.499681	7.9748e-07	2.7804e-06	13.3835	6.67039	20.5192	6.00549e-05	0.000305806
207	PC(18:1_18:2)	-0.805484	-1.21949	-0.389745	0.00016117	0.00039352	5.87911	-2.11491	14.526	0.153471	0.259927
208	PC(18:1_20:3)	-0.918879	-1.25236	-0.584277	1.08987e-07	4.2178e-07	15.8821	8.77618	23.4521	5.81526e-06	3.5441e-05
209	PC(18:1_22:6) (a)	0.281126	0.00382282	0.559198	0.04693	0.0729394	-0.711578	-5.74036	4.58549	0.787375	0.857142
210	PC(18:1_22:6) (b)	0.712413	0.366414	1.0596	5.77712e-05	0.000150555	-6.81638	-12.6454	-0.598451	0.0322408	0.0723315
211	PC(18:2_18:2)	-0.745004	-1.11925	-0.369344	0.000112693	0.000282279	5.71291	-1.52328	13.4808	0.124382	0.218799
212	PC(18:2_20:5)	-0.578581	-0.970329	-0.185283	0.00403765	0.00803377	2.38944	-4.92383	10.2652	0.531674	0.655279
213	PC(20:0_20:4)	0.353719	0.0757852	0.632426	0.0126734	0.0225521	-1.0229	-6.0435	4.26598	0.698223	0.792291
214	PC(28:0)	-0.607337	-0.967492	-0.245872	0.00104022	0.00227438	3.84929	-2.9911	11.172	0.276734	0.40888
215	PC(31:0) (a)	0.515036	0.0890547	0.94283	0.0178374	0.03041	-6.17984	-13.3685	1.60532	0.116573	0.207897
216	PC(31:0) (b)	-0.526941	-0.934743	-0.11746	0.0118018	0.0210961	-5.10166	-12.1441	2.50531	0.182803	0.297872
217	PC(32:1)	-1.38185	-1.77812	-0.983985	2.79083e-11	1.56529e-10	15.7856	7.35772	24.875	0.000154164	0.000701899
218	PC(32:2)	-0.851781	-1.25268	-0.449256	3.87049e-05	0.000105114	7.90783	0.00583053	16.4342	0.0498252	0.102959
219	PC(33:0) (a)	1.1229	0.670017	1.57782	1.32913e-06	4.49234e-06	-6.74079	-14.2761	1.45687	0.104307	0.189071
220	PC(33:0) (b)	0.0477291	-0.337429	0.434376	0.808113	0.846386	-8.91376	-15.2753	-2.07458	0.0115775	0.0312229
221	PC(33:1)	-0.339038	-0.739885	0.0634279	0.0984566	0.137555	2.64564	-4.8328	10.7118	0.49807	0.622789
222	PC(33:2)	0.0337079	-0.367122	0.43615	0.869111	0.896922	-7.16452	-13.9036	0.102082	0.053173	0.108878
223	PC(34:5)	-0.0614586	-0.468285	0.347031	0.767332	0.811359	-6.17973	-13.0949	1.28572	0.102312	0.185891
224	PC(35:5)	0.40853	-0.114545	0.934345	0.125803	0.169933	-14.8815	-22.8303	-6.11393	0.0013166	0.00471783
225	PC(36:6) (a)	-0.590181	-1.05552	-0.122658	0.013501	0.0237495	-3.59728	-11.7242	5.27783	0.414253	0.547153
226	PC(38:2)	-0.539028	-0.815087	-0.262202	0.00014809	0.000365038	14.0602	8.26229	20.1686	9.58091e-07	6.74147e-06
227	PC(38:4) (b)	0.335968	0.0632989	0.60938	0.0157922	0.0272838	6.92566	1.60123	12.5291	0.0102726	0.0278983
228	PC(38:5) (a)	0.211115	-0.0377244	0.460575	0.0962566	0.135004	0.449888	-4.1301	5.24867	0.850226	0.903949
229	PC(38:5) (b)	-0.0306398	-0.320837	0.260402	0.836056	0.868601	8.99019	3.20237	15.1026	0.00203741	0.00679722
230	PC(38:6) (a)	-0.702766	-1.02622	-0.378255	2.53748e-05	7.06478e-05	4.26792	-1.92604	10.8531	0.180663	0.295631
231	PC(38:7)(c)	0.500211	0.187117	0.814284	0.00177006	0.0037229	-1.28765	-6.90287	4.66626	0.664005	0.773838
232	PC(39:5)(a)	2.10311	1.69532	2.51252	1.16796e-22	4.41593e-21	-16.4247	-22.4724	-9.90523	3.37866e-06	2.19755e-05
233	PC(39:5)(b)	1.29609	0.966809	1.62644	3.57187e-14	2.6841e-13	-9.28179	-14.66	-3.56466	0.00183181	0.00625281
234	PC(40:10)	0.608119	-0.209634	1.43257	0.1451	0.193634	-4.32868	-17.917	11.5092	0.570696	0.693437
235	PC(40:7) (a)	-1.47876	-1.83363	-1.12261	2.988e-15	2.75322e-14	21.2453	13.3052	29.7419	3.55258e-08	3.43712e-07
236	PC(40:8)	-1.05216	-1.38135	-0.721871	8.69146e-10	4.23093e-09	14.1033	7.18473	21.4685	3.93849e-05	0.000205973
237	PC(44:12)	0.4645	0.0841802	0.846266	0.0167173	0.02869	-6.73621	-13.1449	0.145388	0.0548462	0.111713
238	PC(O-16:0/16:0)	-0.922131	-1.31295	-0.529762	5.0945e-06	1.55855e-05	9.40353	1.58102	17.8284	0.0176641	0.0443896
239	PC(O-16:0/20:3)	-0.347765	-0.652405	-0.0421901	0.0258118	0.0425634	11.1533	4.94557	17.7282	0.000327704	0.00132797
240	PC(O-16:0/20:4)	-0.537751	-0.896161	-0.178044	0.00348214	0.00701868	9.34688	2.18301	17.013	0.00983706	0.0269042
241	PC(O-16:0/22:6)	0.0461021	-0.273841	0.367071	0.777571	0.821064	0.475214	-5.38754	6.70126	0.876976	0.921004
242	PC(O-18:0/18:1)	-0.308055	-0.62055	0.00542339	0.0540775	0.0820742	14.2451	7.70727	21.1798	1.08181e-05	6.34332e-05
243	PC(O-18:0/18:2)	-0.219369	-0.650927	0.214063	0.320103	0.385318	7.86108	-0.566778	17.0033	0.0682374	0.133711
244	PC(O-18:0/20:4)	0.0721834	-0.237185	0.382511	0.647331	0.710687	4.69377	-1.21724	10.9585	0.12165	0.21448
245	PC(O-18:0/22:6)	0.497809	0.209973	0.786473	0.000718792	0.00159869	-1.76437	-6.9132	3.66925	0.516331	0.639424
246	PC(O-18:1/18:1)	-0.903775	-1.35905	-0.446394	0.000119977	0.000299555	16.3053	6.6747	26.8053	0.000640769	0.00243115
247	PC(O-18:1/18:2)	-0.301969	-0.608312	0.00531914	0.0540799	0.0820742	5.79637	-0.141668	12.0875	0.0558746	0.113242
248	PC(O-32:1)	-0.459175	-0.797605	-0.11959	0.00816782	0.0151604	6.38472	-0.203135	13.4075	0.0577208	0.116343
249	PC(O-32:2)	-0.402414	-0.748585	-0.0550363	0.0232926	0.0389384	2.92485	-3.58646	9.87591	0.386634	0.525931
250	PC(O-34:1)	-1.15183	-1.52128	-0.780998	2.20949e-09	1.01794e-08	14.1832	6.43333	22.4973	0.000230234	0.000979126
251	PC(O-34:2)	-0.112128	-0.440175	0.216999	0.503229	0.571951	0.372484	-5.63756	6.76532	0.905901	0.93739
252	PC(O-34:4)	1.27008	0.862202	1.6796	1.50153e-09	7.08647e-09	2.49254	-4.98455	10.558	0.52351	0.647279
253	PC(O-35:4)	0.144106	-0.173155	0.462376	0.373124	0.438352	-0.448058	-6.20414	5.66126	0.882328	0.925368
254	PC(O-36:0)	0.0763416	-0.273151	0.427059	0.6685	0.72876	6.17779	-0.570355	13.3839	0.0734984	0.142576
255	PC(O-36:5)	-0.0189356	-0.371845	0.335224	0.916266	0.933144	-3.17831	-9.39585	3.46589	0.339579	0.47788
256	PC(O-38:5)	-0.454056	-0.748602	-0.158636	0.00266973	0.00543782	8.72328	2.8411	14.9419	0.0032703	0.0103315
257	PC(O-40:5)	0.415368	0.148729	0.682716	0.00230065	0.00474853	6.86801	1.66541	12.3368	0.00917821	0.0252809
258	PC(O-40:7) (a)	-0.0117428	-0.302846	0.28021	0.936975	0.950483	3.88905	-1.64364	9.73297	0.171448	0.281742
259	PC(O-40:7) (b)	-0.404542	-0.727975	-0.0800548	0.0146737	0.0255881	3.42875	-2.69711	9.94028	0.278597	0.410732
260	PC(P-15:0/20:4) (a)	-0.0134566	-0.398019	0.372591	0.945341	0.957715	-7.11883	-13.5998	-0.151661	0.0453975	0.0962676
261	PC(P-15:0/20:4) (b)	0.180922	-0.076916	0.439425	0.168854	0.220392	-4.92193	-9.4115	-0.209845	0.0408761	0.088622
262	PC(P-16:0/14:0)	-1.00284	-1.44786	-0.555798	1.32286e-05	3.79221e-05	3.96042	-4.46984	13.1346	0.367417	0.505677
263	PC(P-16:0/16:0)	-0.872558	-1.29548	-0.447827	6.4224e-05	0.000166252	4.57963	-3.48517	13.3183	0.273587	0.406985
264	PC(P-16:0/16:1)	-1.07905	-1.49635	-0.659982	6.19476e-07	2.18938e-06	10.9685	2.50351	20.1324	0.010237	0.0278983
265	PC(P-16:0/18:0)	-0.962433	-1.50056	-0.421367	0.000526577	0.00119874	0.436851	-9.32668	11.2517	0.933312	0.953013
266	PC(P-16:0/18:1)	-0.542079	-0.91429	-0.16847	0.00456424	0.0089663	5.58107	-1.59393	13.2792	0.130157	0.227922
267	PC(P-16:0/18:2)	0.53307	0.108201	0.959742	0.0139663	0.0244568	-8.28609	-15.2945	-0.697826	0.0330084	0.0738395
268	PC(P-16:0/18:3)	0.387444	0.0526559	0.723353	0.0233555	0.0389593	-6.28414	-11.9799	-0.219835	0.0425072	0.091645
269	PC(P-16:0/20:4)	-0.429709	-0.83695	-0.0207951	0.0394872	0.0622467	1.69571	-5.83407	9.8276	0.667862	0.77384
270	PC(P-16:0/20:5)	0.0094391	-0.382665	0.403087	0.962379	0.968636	-9.79631	-16.2083	-2.8937	0.00621478	0.0180159
271	PC(P-16:0/22:6)	0.181073	-0.179966	0.543419	0.325457	0.390548	-5.96473	-12.1261	0.628637	0.0752021	0.145516
272	PC(P-17:0/20:4) (a)	0.390754	0.0358954	0.746871	0.0309387	0.0499928	-11.1749	-16.8868	-5.07054	0.000497484	0.00195458
273	PC(P-17:0/20:4) (b)	0.18715	-0.122134	0.497392	0.235427	0.295812	-9.08127	-14.2075	-3.64879	0.00134366	0.0047926
274	PC(P-18:0/18:2)	0.0661538	-0.314477	0.448238	0.73337	0.781857	-1.4873	-8.28811	5.81783	0.680918	0.783144
275	PC(P-18:0/20:4)	-0.110336	-0.469182	0.249805	0.547099	0.615487	-1.06571	-7.52814	5.84834	0.755523	0.833013
276	PC(P-18:0/22:5)	0.401776	0.100047	0.704415	0.00911095	0.0167503	-0.865438	-6.31059	4.89618	0.762619	0.836072
277	PC(P-18:0/22:6)	0.338459	0.0137686	0.664203	0.0410595	0.0642021	-7.35135	-12.8198	-1.53986	0.0139865	0.0368216
278	PC(P-18:1/18:1)	-0.964386	-1.32302	-0.604452	2.16917e-07	7.99496e-07	25.2961	17.0482	34.1252	1.67039e-10	2.48632e-09
279	PC(P-18:1/22:6)	0.184796	-0.125987	0.496546	0.243646	0.305644	-2.72187	-8.23259	3.11978	0.353074	0.492395
280	PC(P-20:0/20:4)	0.566838	0.270453	0.864098	0.000185985	0.00045126	-0.979185	-6.31571	4.66133	0.727328	0.808839
281	PC(P-35:2)(a)	0.503813	0.065403	0.944144	0.0243279	0.0402346	-11.626	-18.5881	-4.06855	0.0032191	0.0102114
282	PC(P-35:2)(b)	0.58897	0.107785	1.07247	0.0164698	0.0283281	-13.6388	-21.0723	-5.50536	0.00144995	0.00510118
283	PC(P-36:3)	-0.0999123	-0.427313	0.228565	0.550024	0.616983	-0.797227	-6.72518	5.50747	0.798708	0.865827
284	PC(P-38:5) (a)	-0.0918182	-0.426108	0.243594	0.590576	0.656761	-1.78969	-7.77771	4.58712	0.573107	0.695274
285	PC(P-38:5) (b)	-0.290314	-0.64507	0.0657091	0.109682	0.150255	4.81345	-1.96925	12.0654	0.168072	0.277989
286	LPC(14:0) [sn1]	-0.547382	-0.842705	-0.25118	0.000314106	0.00073896	15.1812	8.9279	21.7935	8.67075e-07	6.21404e-06
287	LPC(14:0) [sn2]	-0.622226	-0.910328	-0.333286	2.80045e-05	7.74125e-05	15.1826	9.07375	21.6336	4.72335e-07	3.73048e-06
288	LPC(15-MHDA) [sn1] [104_sn1]	1.26659	0.892031	1.64254	5.87551e-11	3.18017e-10	-2.87209	-9.39813	4.12401	0.410914	0.545536
289	LPC(15-MHDA) [sn1] / LPC(17:0) [sn2]	0.987224	0.667012	1.30845	2.22488e-09	1.01897e-08	-2.11	-7.7748	3.90275	0.482569	0.612309
290	LPC(15-MHDA) [sn2]	1.29074	0.916962	1.6659	2.36743e-11	1.33751e-10	-0.0243243	-6.72658	7.15953	0.994509	0.994509
291	LPC(15:0) [sn1]	-0.0857913	-0.374906	0.204162	0.56099	0.628374	6.49921	0.861208	12.4524	0.0233472	0.0561202
292	LPC(15:0) [sn2]	-0.0085351	-0.31594	0.299818	0.9566	0.964073	6.46596	0.487305	12.8003	0.0336521	0.074642
293	LPC(16:0) [sn1]	-0.339162	-0.619786	-0.0577444	0.0182891	0.0310433	15.5212	9.56599	21.8001	1.2351e-07	1.07412e-06
294	LPC(16:0) [sn2]	-0.228268	-0.524894	0.0692429	0.132239	0.177696	14.3813	8.16416	20.9558	2.92359e-06	1.96771e-05
295	LPC(16:1) [sn1]	-1.46443	-1.78257	-1.14526	4.29251e-18	6.26869e-17	36.5146	28.4746	45.0579	4.0807e-22	1.57923e-19
296	LPC(16:1) [sn2]	-1.36044	-1.70892	-1.01073	1.1619e-13	8.17555e-13	34.1124	25.4929	43.3238	3.95728e-17	2.55245e-15
297	LPC(17:0) [sn1]	0.769917	0.484956	1.05569	1.483e-07	5.57205e-07	-3.0703	-8.08795	2.22128	0.249691	0.375994
298	LPC(17:1) (a) [sn1] [104_sn1]	-0.302457	-0.635478	0.0316795	0.0759072	0.109933	14.6904	7.70906	22.1243	2.12162e-05	0.000118139
299	LPC(17:1) [sn1] (a) / LPC(17:1) [sn2] (b)	-0.376464	-0.695097	-0.0568089	0.0211006	0.0355814	15.7905	9.03322	22.9665	2.12642e-06	1.44733e-05
300	LPC(17:1) [sn1] (b)	-0.604898	-0.962604	-0.2459	0.00100686	0.00220767	4.58361	-2.25963	11.906	0.193876	0.313277
301	LPC(17:1) [sn2] (a)	-0.524945	-0.849976	-0.198849	0.00166729	0.00352591	18.2674	11.2208	25.7604	1.17178e-07	1.03063e-06
302	LPC(18:0) [sn1]	0.0576955	-0.208838	0.32494	0.671213	0.730687	8.73639	3.4264	14.319	0.00107819	0.0039364
303	LPC(18:0) [sn2]	0.06068	-0.216022	0.338149	0.667181	0.728347	9.56402	4.01463	15.4095	0.000597908	0.00229099
304	LPC(18:1) [sn1]	-1.32096	-1.58577	-1.05543	8.32782e-21	1.79048e-19	30.0315	23.6356	36.7583	1.06069e-22	8.2097e-20
305	LPC(18:1) [sn2]	-1.33019	-1.63658	-1.02286	2.17694e-16	2.51486e-15	32.5502	25.0343	40.518	6.13066e-20	1.18628e-17
306	LPC(18:2) [sn1]	-1.36083	-1.69513	-1.02538	1.13648e-14	9.67024e-14	24.5271	16.8393	32.7207	3.31822e-11	5.9728e-10
307	LPC(18:2) [sn2]	-1.24237	-1.57241	-0.911225	7.40525e-13	4.73691e-12	21.1153	13.7394	28.9696	3.69757e-09	4.54273e-08
308	LPC(18:3) (a) [sn1] [104_sn1]	-0.885663	-1.26047	-0.509431	4.90771e-06	1.50737e-05	22.6485	14.2292	31.6883	2.67117e-08	2.61707e-07
309	LPC(18:3) [sn1] (a)/LPC(18:3) [sn2] (b)	-1.32518	-1.67302	-0.976106	4.13783e-13	2.73733e-12	31.8825	23.4243	40.9204	1.51609e-15	8.38181e-14
310	LPC(18:3) [sn1] (b)	-1.84313	-2.23941	-1.44524	2.40782e-18	3.65422e-17	43.2418	32.7678	54.5421	2.84526e-19	4.40446e-17
311	LPC(18:3) [sn2] (a)	-0.641157	-0.99946	-0.281557	0.000506345	0.00116294	16.216	8.59662	24.3699	1.58645e-05	9.09567e-05
312	LPC(19:0) (a) [sn1] [104_sn1]	3.62578	2.99328	4.26216	1.92605e-27	4.49251e-25	-6.88455	-16.9931	4.45502	0.223301	0.348458
313	LPC(19:0) [sn1] (a) / LPC(19:0) [sn2] (b)	2.81766	2.30561	3.33226	1.90339e-25	1.22768e-23	-6.61026	-14.9643	2.56453	0.152303	0.258514
314	LPC(19:0) [sn1] (b)	1.79098	1.39041	2.19313	1.09051e-17	1.50724e-16	-6.41688	-13.0928	0.771869	0.0789345	0.152357
315	LPC(19:0) [sn2] (a)	3.3616	2.76406	3.96262	1.58619e-26	1.53464e-24	-4.04127	-13.9359	6.9909	0.45688	0.594328
316	LPC(19:1) (a)	0.214018	-0.16433	0.5938	0.267429	0.329602	10.3359	2.77382	18.4544	0.00670379	0.0193609
317	LPC(19:1) (b)	-0.0270748	-0.342381	0.289229	0.866361	0.896475	7.39579	1.2131	13.9562	0.0184316	0.0460196
318	LPC(19:1) (c)	-0.0737467	-0.473925	0.328041	0.718171	0.769895	2.63625	-4.81035	10.6654	0.497715	0.622789
319	LPC(20:0) [sn1]	0.180535	-0.0802835	0.442033	0.174695	0.227251	5.1091	0.0897872	10.3801	0.0459566	0.096922
320	LPC(20:0) [sn2]	0.667904	0.361355	0.975389	2.11757e-05	5.98176e-05	3.42134	-2.33273	9.51441	0.248891	0.375519
321	LPC(20:1) [sn1]	-0.509496	-0.777979	-0.240285	0.00022472	0.000538494	17.2589	11.4597	23.3598	1.3097e-09	1.63501e-08
322	LPC(20:1) [sn2]	-0.601441	-0.883395	-0.318685	3.4915e-05	9.51556e-05	20.1188	13.8819	26.6972	3.50032e-11	6.15738e-10
323	LPC(20:2) [sn1]	-1.15271	-1.44085	-0.863725	2.83375e-14	2.1716e-13	27.6333	20.8278	34.8222	2.33516e-17	1.80741e-15
324	LPC(20:2) [sn2]	-1.23264	-1.54415	-0.920158	5.33827e-14	3.86151e-13	26.6591	19.3676	34.3961	2.31476e-14	8.53154e-13
325	LPC(20:3) [sn1]	-1.33069	-1.65527	-1.00505	7.4141e-15	6.59599e-14	29.1611	21.415	37.4014	2.62398e-15	1.26935e-13
326	LPC(20:3) [sn2]	-1.3203	-1.64564	-0.993878	1.33509e-14	1.08775e-13	27.4557	19.7951	35.6062	6.37155e-14	1.76128e-12
327	LPC(20:4) [sn1]	-1.21509	-1.5504	-0.878636	4.65995e-12	2.73242e-11	22.8447	15.2496	30.9402	4.81467e-10	6.31619e-09
328	LPC(20:4) [sn2]	-1.03897	-1.3582	-0.718712	4.34789e-10	2.21399e-09	19.9031	12.8476	27.3998	6.95056e-09	8.15111e-08
329	LPC(20:5) [sn1]	-1.05419	-1.53928	-0.566715	2.64994e-05	7.35146e-05	9.96377	0.273715	20.5902	0.0436077	0.0934968
330	LPC(20:5) [sn2]	-0.869451	-1.35895	-0.377519	0.000569564	0.00129279	5.91714	-3.48082	16.2302	0.224802	0.350095
331	LPC(22:0) [sn1]	-0.201625	-0.429567	0.0268389	0.0835281	0.118843	2.63156	-1.68022	7.13244	0.235071	0.363164
332	LPC(22:0) [sn2]	-0.102763	-0.36003	0.155168	0.433887	0.499744	4.05499	-0.861447	9.21524	0.107295	0.192683
333	LPC(22:1) [sn1]	-0.674005	-0.920748	-0.426648	1.32895e-07	5.01761e-07	15.9169	10.6295	21.4569	9.80669e-10	1.24432e-08
334	LPC(22:1) [sn2]	-0.752566	-1.02308	-0.481311	8.00546e-08	3.17755e-07	18.354	12.4433	24.5754	2.19593e-10	3.20689e-09
335	LPC(22:4) [sn1]	-0.602668	-0.896661	-0.307803	6.91066e-05	0.00017653	23.8155	17.1193	30.8946	1.71584e-13	4.1502e-12
336	LPC(22:4) [sn2]	-0.481965	-0.781905	-0.181118	0.00175328	0.00369765	21.5945	14.8969	28.6826	2.97366e-11	5.48004e-10
337	LPC(22:5) (n3) [sn1] [104_sn1]	0.22615	-0.139554	0.593194	0.225354	0.284544	10.6463	3.30907	18.5046	0.00392161	0.0120024
338	LPC(22:5) [sn1] (n3)/LPC(22:5) [sn2] (n6)	-0.149142	-0.475454	0.178241	0.370878	0.436924	19.4703	12.3509	27.0409	2.04289e-08	2.13675e-07
339	LPC(22:5) [sn1] (n6)	-1.19499	-1.62288	-0.76524	7.81508e-08	3.11798e-07	40.2298	29.2592	52.1315	2.17219e-15	1.12085e-13
340	LPC(22:5) [sn2] (n3)	0.19333	-0.166819	0.554779	0.292585	0.356631	10.8786	3.63184	18.6321	0.00280864	0.00905785
341	LPC(22:6) [sn1]	-0.308542	-0.654403	0.0385239	0.081274	0.116493	17.5273	10.1054	25.4494	1.4903e-06	1.02991e-05
342	LPC(22:6) [sn2]	-0.183371	-0.503067	0.137353	0.261611	0.323461	15.4567	8.70976	22.6224	3.43377e-06	2.21478e-05
343	LPC(24:0) [sn1]	-0.0455569	-0.282361	0.19181	0.706083	0.759039	-2.08086	-6.34473	2.37713	0.353978	0.492768
344	LPC(24:0) [sn2]	-0.0802254	-0.342656	0.182897	0.549158	0.616906	-1.73245	-6.46544	3.24003	0.48712	0.616637
345	LPC(26:0) [sn1]	-0.216478	-0.552852	0.121033	0.208001	0.266986	-3.1187	-9.06862	3.22054	0.326609	0.465063
346	LPC(26:0) [sn2]	-0.132006	-0.429038	0.165913	0.384131	0.44912	-0.552182	-5.95973	5.16631	0.845845	0.900528
347	LPC(O-16:0)	-0.271062	-0.544569	0.00319669	0.0527181	0.0804808	15.9491	10.1237	22.0828	2.66993e-08	2.61707e-07
348	LPC(O-18:0)	0.062891	-0.241757	0.368469	0.685657	0.742236	12.031	5.7991	18.63	0.000107969	0.000519058
349	LPC(O-18:1)	-0.578723	-0.86458	-0.292041	8.45052e-05	0.000214449	19.0875	12.8221	25.7007	4.35959e-10	5.84763e-09
350	LPC(O-20:0)	0.420952	0.145442	0.69722	0.00278705	0.00566189	11.9834	6.35513	17.9096	1.90846e-05	0.000107821
351	LPC(O-20:1)	0.211122	-0.0801312	0.503225	0.155241	0.204001	19.3793	13.0322	26.0827	3.86496e-10	5.43905e-09
352	LPC(O-22:0)	0.455497	0.216047	0.69552	0.000201962	0.000486974	6.1557	1.50544	11.019	0.00904251	0.0249961
353	LPC(O-22:1)	0.49696	0.21728	0.777422	0.00051238	0.00116986	19.4585	13.3703	25.8736	5.7031e-11	9.39192e-10
354	LPC(O-24:0)	0.653608	0.379411	0.928553	3.39202e-06	1.06293e-05	0.368771	-4.641	5.64173	0.887767	0.927303
355	LPC(O-24:1)	0.574539	0.319935	0.829789	1.07927e-05	3.15672e-05	13.6842	8.40216	19.2237	1.68846e-07	1.43612e-06
356	LPC(O-24:2)	0.828671	0.547531	1.1106	1.0547e-08	4.46084e-08	4.06811	-1.2456	9.66774	0.135634	0.235383
357	LPC(P-16:0)	-0.135797	-0.399332	0.128435	0.312905	0.378419	10.112	4.78383	15.711	0.000150945	0.000691311
358	LPC(P-17:0) (a)	0.133946	-0.179748	0.448625	0.402446	0.466307	-0.542136	-6.23046	5.49126	0.856207	0.907814
359	LPC(P-17:0) (b)	0.0224791	-0.257557	0.303302	0.874943	0.90101	1.98463	-3.24352	7.49528	0.463589	0.598059
360	LPC(P-18:0)	-0.312704	-0.58249	-0.0421853	0.023581	0.0392258	8.40609	3.02972	14.063	0.00191981	0.00648878
361	LPC(P-18:1)	-0.356229	-0.643804	-0.0678223	0.0156067	0.0270238	12.2121	6.2869	18.4677	3.48419e-05	0.000185983
362	LPC(P-20:0)	0.0699323	-0.1816	0.322099	0.585584	0.653087	6.89181	1.95974	12.0625	0.00576688	0.0169717
363	PE(15-MHDA_18:1)	1.32398	0.8847	1.76516	4.72554e-09	2.04333e-08	-8.34711	-15.5249	-0.559422	0.036233	0.0794456
364	PE(15-MHDA_18:2)	1.04326	0.552969	1.53594	3.20952e-05	8.84045e-05	-12.6317	-20.255	-4.27956	0.00381182	0.0117544
365	PE(15-MHDA_20:4)	1.33077	0.913116	1.75016	6.33897e-10	3.1451e-09	-16.0383	-22.3016	-9.27024	1.1311e-05	6.58248e-05
366	PE(15-MHDA_22:6)	2.42849	1.92789	2.93155	1.93727e-20	3.94591e-19	-21.4882	-28.3862	-13.9259	3.26738e-07	2.66206e-06
367	PE(16:0_16:0)	0.38193	-0.0453882	0.811075	0.0797803	0.114777	-0.743967	-8.38184	7.53065	0.854736	0.907497
368	PE(16:0_16:1)	-0.119336	-0.608637	0.372373	0.633151	0.697096	15.0818	4.94805	26.194	0.00287824	0.00924382
369	PE(16:0_18:1)	0.463572	-0.112543	1.04301	0.11477	0.15667	-0.36494	-10.5601	10.9924	0.946987	0.964238
370	PE(16:0_18:2)	0.399857	-0.0645203	0.866392	0.0914464	0.12869	-2.21263	-10.3622	6.67784	0.613747	0.730831
371	PE(16:0_18:3) (a)	0.815355	0.0617088	1.57468	0.0339632	0.0544256	-3.50233	-16.1796	11.0923	0.619272	0.735149
372	PE(16:0_18:3) (b)	0.174717	-0.301152	0.652858	0.471807	0.538612	10.952	1.46561	21.3253	0.0227433	0.0553564
373	PE(16:0_20:3)	0.19186	-0.230501	0.616008	0.373222	0.438352	-0.308456	-7.90798	7.91819	0.939032	0.95759
374	PE(16:0_20:4)	0.178224	-0.156824	0.514396	0.296957	0.360824	-0.121518	-6.20868	6.3607	0.969719	0.979846
375	PE(16:0_20:5)	0.221214	-0.245908	0.690522	0.353298	0.419406	-10.5445	-18.0548	-2.34597	0.0128438	0.034045
376	PE(16:0_22:6)	1.01753	0.642666	1.39379	1.27393e-07	4.84574e-07	-9.38135	-15.4894	-2.83183	0.00573882	0.0169536
377	PE(16:1_18:2)	-0.528748	-1.00383	-0.0513887	0.0300372	0.0486376	8.30778	-1.00042	18.4912	0.0816375	0.156705
378	PE(16:1_20:4)	-0.728405	-1.11256	-0.342755	0.000232951	0.000556493	14.6599	6.61177	23.3156	0.000243387	0.00101828
379	PE(17:0_18:1)	1.14913	0.678811	1.62164	1.87527e-06	6.22945e-06	-10.2088	-17.7299	-2.00016	0.0159255	0.0412253
380	PE(17:0_18:2)	1.12588	0.675893	1.57787	1.06806e-06	3.65786e-06	-13.1491	-20.1232	-5.56604	0.000998086	0.00367866
381	PE(17:0_20:4)	1.07536	0.730913	1.42099	1.39907e-09	6.68443e-09	-12.3095	-17.752	-6.5068	6.40773e-05	0.000324156
382	PE(17:0_22:6)	2.0034	1.53983	2.46909	1.04283e-16	1.28119e-15	-19.7689	-26.3435	-12.6075	5.62342e-07	4.30943e-06
383	PE(18:0_18:1)	0.853405	0.323281	1.38633	0.0016211	0.00343762	-1.07762	-10.3948	9.20842	0.829755	0.885835
384	PE(18:0_18:2)	0.502051	0.0211957	0.985217	0.0407295	0.0638151	-4.46819	-12.6924	4.53068	0.319038	0.458136
385	PE(18:0_20:3) (a)	0.49991	0.130077	0.871109	0.00810976	0.0150888	-2.84487	-9.34065	4.11633	0.413045	0.547153
386	PE(18:0_20:3) (b)	-0.71768	-1.07315	-0.360928	8.98492e-05	0.000227266	22.7607	14.7679	31.3103	3.82619e-09	4.6273e-08
387	PE(18:0_20:4)	0.503507	0.185477	0.822547	0.00194644	0.00407174	-4.17844	-9.71258	1.69491	0.159324	0.26808
388	PE(18:0_22:4)	1.17656	0.661918	1.69383	8.01304e-06	2.38542e-05	-2.5058	-11.4051	7.28738	0.602766	0.722199
389	PE(18:0_22:5) (n3)	1.54787	1.05038	2.04781	1.49528e-09	7.08647e-09	-10.5672	-18.4427	-1.93118	0.0176549	0.0443896
390	PE(18:0_22:5) (n6)	0.701012	0.182949	1.22175	0.00802711	0.014971	10.4178	0.229077	21.6422	0.0448423	0.0956141
391	PE(18:0_22:6)	1.54758	1.11365	1.98337	5.26237e-12	3.06246e-11	-10.8695	-17.7533	-3.40946	0.00509373	0.0152222
392	PE(18:1_18:1)	0.304363	-0.265881	0.877868	0.295586	0.359722	1.84796	-8.48834	13.3518	0.736949	0.81719
393	PE(18:1_18:2)	-0.0156983	-0.547517	0.518964	0.953916	0.962622	-0.591625	-10.061	9.87475	0.907361	0.937417
394	PE(18:1_22:6) (a)	0.55804	0.139546	0.978283	0.00900114	0.0165878	-6.34989	-13.4011	1.27546	0.100295	0.182654
395	PE(18:1_22:6) (b)	1.07679	0.598919	1.55693	1.08079e-05	3.15672e-05	-14.7179	-21.9763	-6.78434	0.000473261	0.0018689
396	PE(20:0_20:4)	0.534034	-0.00826937	1.07928	0.0535953	0.081659	0.0356847	-9.62181	10.7251	0.994495	0.994509
397	PE(36:0)	0.139315	0.0364472	0.242289	0.00801872	0.014971	-2.39352	-4.25844	-0.49228	0.0139311	0.036801
398	PE(38:5) (a)	0.0977103	-0.307649	0.504718	0.636612	0.699911	1.68516	-5.77222	9.73272	0.666692	0.773838
399	PE(38:5) (b)	0.521023	0.0515302	0.99272	0.0296436	0.0481009	9.99466	0.741631	20.0976	0.0336564	0.074642
400	PE(O-16:0/18:2)	0.986727	0.532806	1.4427	2.17546e-05	6.10075e-05	-4.14792	-11.9198	4.30976	0.325536	0.465063
401	PE(O-16:0/20:3)	2.16891	1.57489	2.76642	1.53935e-12	9.38153e-12	-0.801263	-11.0856	10.6726	0.885266	0.925941
402	PE(O-16:0/20:4)	1.79774	1.36011	2.23726	2.69678e-15	2.57692e-14	-4.21045	-11.6517	3.85757	0.296572	0.430372
403	PE(O-16:0/22:4)	0.751669	0.383037	1.12165	6.78613e-05	0.000174501	8.08232	0.896078	15.7804	0.026891	0.0625034
404	PE(O-16:0/22:6)	-0.587816	-0.93858	-0.23581	0.00111553	0.00243217	11.6262	4.46065	19.2832	0.00119539	0.00430341
405	PE(O-18:0/20:4)	1.9539	1.46476	2.4454	1.35344e-14	1.09121e-13	-3.21872	-11.5724	5.92408	0.476857	0.606054
406	PE(O-18:0/22:5)	2.25056	1.68801	2.81622	1.16496e-14	9.69545e-14	1.17982	-8.77336	12.2189	0.824035	0.880943
407	PE(O-18:0/22:6)	0.110173	-0.243708	0.46531	0.54163	0.612002	7.43222	0.523545	14.8157	0.0345684	0.0764456
408	PE(O-18:1/18:2)	1.05343	0.431543	1.67917	0.000909794	0.00200051	2.17918	-9.00004	14.7318	0.714937	0.800008
409	PE(O-18:1/22:6)	-0.688649	-1.04109	-0.334949	0.000149125	0.00036642	12.5807	5.31325	20.3497	0.000523686	0.00204714
410	PE(O-34:1)	0.33956	-0.066677	0.747448	0.101311	0.141288	6.07752	-1.70009	14.4705	0.128611	0.225725
411	PE(O-36:5)	2.08197	1.36231	2.80675	1.69427e-08	6.93845e-08	-12.1111	-23.0406	0.370548	0.0567092	0.114603
412	PE(O-38:5) (a)	0.72565	0.351076	1.10162	0.000152701	0.000374021	1.96298	-4.92382	9.34861	0.585303	0.705151
413	PE(O-38:5) (b)	0.145577	-0.228795	0.521354	0.445863	0.512015	14.354	6.59109	22.6823	0.000196399	0.000849234
414	PE(P-15:0/20:4) (a)	0.770177	0.237837	1.30535	0.00459794	0.00900964	-4.50142	-13.5391	5.48103	0.36326	0.501183
415	PE(P-15:0/20:4) (b)	1.33807	0.583667	2.09814	0.000512296	0.00116986	-7.77114	-19.8406	6.11555	0.257757	0.385143
416	PE(P-15:0/22:6) (a)	0.351085	-0.115083	0.819429	0.139863	0.186967	4.65937	-4.09924	14.2179	0.306538	0.442651
417	PE(P-15:0/22:6) (b)	-1.24359	-1.67065	-0.814674	2.22648e-08	9.06997e-08	29.6691	19.5387	40.6579	6.86858e-10	8.86047e-09
418	PE(P-16:0/18:1)	-0.0788333	-0.464348	0.308175	0.688799	0.744596	11.4818	3.6793	19.8714	0.00338911	0.0106633
419	PE(P-16:0/18:2)	0.822655	0.402136	1.24493	0.000131141	0.00032533	-0.446513	-7.95811	7.67811	0.910835	0.938163
420	PE(P-16:0/18:3)	0.146456	-0.289067	0.583881	0.509837	0.578613	1.62363	-6.35886	10.2866	0.69914	0.792291
421	PE(P-16:0/20:3) (a)	0.556357	0.204431	0.90952	0.00197423	0.00411874	1.35348	-5.10151	8.24755	0.688389	0.786547
422	PE(P-16:0/20:3) (b)	0.396002	-0.0198992	0.813633	0.0620012	0.0924643	2.9584	-4.75937	11.3016	0.462709	0.598059
423	PE(P-16:0/20:4)	0.276229	-0.104418	0.658327	0.154831	0.203808	-0.61197	-7.4596	6.74235	0.865946	0.913136
424	PE(P-16:0/20:5)	0.710344	0.1666	1.25704	0.0104775	0.0188157	-13.9139	-22.2318	-4.70633	0.00392326	0.0120024
425	PE(P-16:0/22:4)	-0.13554	-0.468958	0.198996	0.426049	0.491448	4.87945	-1.50172	11.674	0.136606	0.236539
426	PE(P-16:0/22:5) (n3)	0.15273	-0.243162	0.550192	0.449492	0.515418	-2.70487	-9.67572	4.80397	0.469095	0.602122
427	PE(P-16:0/22:5) (n6)	-0.591684	-0.950338	-0.231732	0.00133117	0.00286998	17.1268	9.44419	25.3488	5.77051e-06	3.5441e-05
428	PE(P-16:0/22:6)	-0.673988	-0.998286	-0.348628	5.53998e-05	0.000145354	9.61491	3.08864	16.5543	0.0034408	0.0107821
429	PE(P-17:0/20:4) (a)	0.616396	0.260799	0.973254	0.000696985	0.00155466	-9.86166	-15.657	-3.66806	0.00225075	0.00735054
430	PE(P-17:0/20:4) (b)	0.724494	0.354349	1.096	0.000130549	0.000324903	-8.25601	-14.3818	-1.69198	0.0146161	0.0380903
431	PE(P-17:0/22:6) (a)	0.383814	0.0293919	0.739493	0.0338197	0.054308	-6.85748	-12.8402	-0.464042	0.0360126	0.0791868
432	PE(P-17:0/22:6) (b)	0.164612	-0.173552	0.50392	0.339863	0.406575	-5.47869	-11.2921	0.71569	0.0817943	0.156705
433	PE(P-18:0/18:1)	0.463118	-0.0186044	0.947162	0.0595207	0.0891084	3.42241	-5.49975	13.187	0.464114	0.598059
434	PE(P-18:0/18:2)	1.2203	0.692217	1.75115	6.39806e-06	1.93441e-05	-7.07387	-15.764	2.51278	0.142755	0.246086
435	PE(P-18:0/18:3)	0.360651	-0.184904	0.909188	0.195089	0.252507	-1.74285	-11.2985	8.84222	0.73585	0.817142
436	PE(P-18:0/20:3) (a)	1.09982	0.698981	1.50225	9.30095e-08	3.63583e-07	-1.69892	-8.7623	5.91129	0.651924	0.76453
437	PE(P-18:0/20:3) (b)	1.065	0.625611	1.50631	2.26888e-06	7.37862e-06	-3.68334	-11.2469	4.5248	0.367825	0.505677
438	PE(P-18:0/20:4)	0.636228	0.233518	1.04056	0.00198452	0.00412907	-4.25277	-11.1944	3.23143	0.257224	0.385089
439	PE(P-18:0/20:5)	0.91573	0.35781	1.47675	0.00130996	0.00284806	-14.6041	-23.0436	-5.23903	0.00300484	0.00961053
440	PE(P-18:0/22:4)	0.245261	-0.232062	0.724868	0.313875	0.379001	-1.13147	-9.60374	8.13484	0.80309	0.869359
441	PE(P-18:0/22:5) (n3)	0.622407	0.149777	1.09727	0.00988245	0.0179134	-9.45869	-17.1166	-1.09321	0.0276082	0.0635974
442	PE(P-18:0/22:5) (n6)	0.0460207	-0.337301	0.430817	0.813983	0.851383	9.01572	1.43695	17.1607	0.0189566	0.0469317
443	PE(P-18:0/22:6)	0.0550362	-0.25705	0.368099	0.729537	0.77992	1.51454	-4.26691	7.64514	0.61482	0.730985
444	PE(P-18:1/18:1)	0.00674678	-0.416796	0.432091	0.975105	0.98017	8.26852	-0.0218249	17.2463	0.050629	0.10422
445	PE(P-18:1/18:1) (a)	-0.0141002	-0.442277	0.415919	0.948568	0.959727	9.21019	0.757979	18.3714	0.0321123	0.0722528
446	PE(P-18:1/18:1) (b)	0.110964	-0.335056	0.558981	0.625872	0.691049	1.61867	-6.55107	10.5027	0.70685	0.797549
447	PE(P-18:1/18:2) (a)	0.756521	0.241597	1.27409	0.00400737	0.00799408	-1.0956	-10.1643	8.88862	0.822076	0.880943
448	PE(P-18:1/18:2) (b)	0.65968	-0.0251694	1.34922	0.059037	0.0885555	-8.98746	-19.9336	3.4551	0.149444	0.254219
449	PE(P-18:1/18:3)	0.652513	-0.0838104	1.39426	0.0824298	0.117497	-9.39157	-21.0567	3.99722	0.160413	0.269327
450	PE(P-18:1/20:3) (a)	0.593997	0.217204	0.972206	0.00203097	0.00421441	3.14243	-3.8728	10.6696	0.388652	0.526824
451	PE(P-18:1/20:3) (b)	0.634113	0.110243	1.16072	0.017696	0.0302355	-2.34338	-11.4567	7.70798	0.634686	0.749996
452	PE(P-18:1/20:4) (a)	0.214222	-0.132207	0.561854	0.225356	0.284544	0.784706	-5.55778	7.55314	0.813373	0.876643
453	PE(P-18:1/20:4) (b)	0.197287	-0.245112	0.641648	0.382055	0.447369	-7.41444	-14.7938	0.603963	0.0690202	0.134903
454	PE(P-18:1/20:5) (a)	0.866536	0.235666	1.50138	0.00711558	0.0134328	-11.757	-21.5605	-0.728364	0.0374162	0.0815778
455	PE(P-18:1/20:5) (b)	0.18489	-0.790666	1.17004	0.710956	0.763218	-2.84468	-19.1463	16.7437	0.757738	0.834267
456	PE(P-18:1/22:4)	-0.216233	-0.559376	0.128095	0.217638	0.277059	6.71497	0.0332304	13.843	0.0488381	0.101342
457	PE(P-18:1/22:5) (a)	-0.00281171	-0.433635	0.429876	0.9898	0.99108	-1.96652	-9.598	6.30919	0.630469	0.746152
458	PE(P-18:1/22:5) (b)	-0.53667	-0.927363	-0.144436	0.00745122	0.0140322	17.364	9.00639	26.3625	2.41474e-05	0.000133501
459	PE(P-18:1/22:6) (a)	-0.568054	-0.857006	-0.27826	0.00013398	0.000331311	8.23795	2.48397	14.315	0.00457904	0.0137906
460	PE(P-18:1/22:6) (b)	-0.545614	-0.931405	-0.158321	0.00587672	0.0112311	1.4756	-5.66368	9.15516	0.693461	0.790485
461	PE(P-19:0/20:4) (a)	1.69441	1.2831	2.10739	2.32492e-15	2.24936e-14	-7.60885	-14.3764	-0.306387	0.0414747	0.0896688
462	PE(P-19:0/20:4) (b)	1.64438	1.24679	2.04353	1.8492e-15	1.83498e-14	-3.14213	-10.0116	4.25178	0.39437	0.531313
463	PE(P-20:0/18:1)	1.03304	0.719071	1.34798	1.87872e-10	9.75928e-10	0.282208	-5.4084	6.31516	0.924552	0.947112
464	PE(P-20:0/18:2)	1.30269	0.813319	1.79445	2.13606e-07	7.92892e-07	-6.96032	-15.0442	1.89275	0.119569	0.211777
465	PE(P-20:0/20:4)	0.993526	0.576783	1.412	3.30999e-06	1.04569e-05	-4.05235	-11.2175	3.69112	0.295623	0.430098
466	PE(P-20:0/22:6)	1.19465	0.877956	1.51233	3.55912e-13	2.39544e-12	-2.40099	-7.97742	3.51336	0.417528	0.549603
467	PE(P-20:1/20:4)	1.03197	0.651732	1.41364	1.27717e-07	4.84574e-07	3.35797	-3.70426	10.9381	0.359759	0.498018
468	PE(P-20:1/22:6)	1.01363	0.664553	1.36392	1.67967e-08	6.91523e-08	4.9708	-1.63304	12.018	0.143094	0.246121
469	LPE(16:0) [sn1]	-0.160428	-0.418002	0.0978128	0.222688	0.282095	17.8142	12.238	23.6674	7.12351e-11	1.0811e-09
470	LPE(16:0) [sn2]	-0.196805	-0.457662	0.0647358	0.139847	0.186967	18.1398	12.4765	24.0881	6.11112e-11	9.85419e-10
471	LPE(17:0) [sn1]	-0.240207	-0.563601	0.0842381	0.146289	0.194293	7.13311	0.798752	13.8655	0.0267731	0.0624169
472	LPE(17:0) [sn2]	-0.0215273	-0.266674	0.224222	0.86331	0.894514	4.15482	-0.535779	9.06663	0.0832582	0.158724
473	LPE(18:0) [sn1]	-0.171158	-0.441418	0.0998357	0.215073	0.274652	12.4367	6.85863	18.306	7.32906e-06	4.39743e-05
474	LPE(18:0) [sn2]	-0.24049	-0.515734	0.0355167	0.0875012	0.12404	14.176	8.40579	20.2534	6.83585e-07	5.1521e-06
475	LPE(18:1) [sn1]	-1.27316	-1.57303	-0.972375	8.78925e-16	9.31902e-15	30.4669	23.2262	38.1331	9.43697e-19	1.21737e-16
476	LPE(18:1) [sn2]	-1.29968	-1.59747	-1.001	1.52658e-16	1.81781e-15	32.5055	25.1995	40.2378	6.59629e-21	1.70184e-18
477	LPE(18:2) [sn1]	-1.71176	-2.11406	-1.3078	9.12359e-16	9.54278e-15	35.2434	25.2224	46.0665	5.70952e-14	1.63673e-12
478	LPE(18:2) [sn2]	-1.73202	-2.14304	-1.31927	1.6711e-15	1.67978e-14	36.5279	26.1984	47.7029	3.4487e-14	1.11221e-12
479	LPE(20:4) [sn1]	-1.83118	-2.21668	-1.44416	5.0331e-19	8.65693e-18	34.0767	24.5315	44.3535	2.87082e-14	1.01001e-12
480	LPE(20:4) [sn2]	-1.79386	-2.17716	-1.40905	1.49698e-18	2.36462e-17	34.0495	24.5622	44.2594	2.11729e-14	8.1939e-13
481	LPE(22:6) [sn1]	-1.17317	-1.57868	-0.765984	2.68946e-08	1.08987e-07	24.1207	14.9017	34.0793	5.7047e-08	5.3198e-07
482	LPE(22:6) [sn2]	-1.21548	-1.62648	-0.802757	1.35084e-08	5.68235e-08	25.5859	16.1326	35.8087	1.72038e-08	1.84941e-07
483	LPE(P-16:0)	-0.408063	-0.810927	-0.00356176	0.0480269	0.0743457	15.0105	6.5849	24.1022	0.000332022	0.00133846
484	LPE(P-18:0)	-0.334194	-0.699744	0.0327022	0.0740902	0.107793	11.6191	4.18018	19.5893	0.00183384	0.00625281
485	LPE(P-18:1)	-0.655838	-1.11515	-0.194391	0.00546405	0.0105729	19.8227	9.84051	30.712	5.05589e-05	0.000260884
486	LPE(P-20:0)	0.0213589	-0.266814	0.310365	0.884465	0.905524	6.3969	0.788047	12.3179	0.0249027	0.0589441
487	PI (38:5) (b)	-0.636034	-0.900681	-0.370681	3.26125e-06	1.03451e-05	-0.332575	-5.199	4.78366	0.896058	0.930627
488	PI(15-MHDA_20:4)\PI(17:0_20:4)	1.01404	0.760438	1.26827	1.55844e-14	1.24354e-13	-11.1559	-15.2504	-6.86359	1.10408e-06	7.69872e-06
489	PI(16:0_16:1)	0.362222	-0.00339278	0.729174	0.0521611	0.0797879	9.21435	1.98331	16.9581	0.0117632	0.0316136
490	PI(16:0_20:3) (a)	-0.206068	-0.485127	0.0737733	0.148492	0.196466	2.64749	-2.60844	8.18707	0.32927	0.465063
491	PI(16:0_20:3) (b)	-1.33189	-1.76077	-0.901134	2.652e-09	1.1934e-08	35.6277	24.9792	47.1834	8.19387e-13	1.81202e-11
492	PI(16:0_20:4)	0.0988108	-0.161264	0.359563	0.456215	0.522051	3.27129	-1.65045	8.43933	0.195948	0.314634
493	PI(16:0/16:0)	1.68118	1.2249	2.13952	1.07139e-12	6.67828e-12	-6.22593	-13.8172	2.03399	0.13531	0.235348
494	PI(17:0_18:1)	1.78201	1.34759	2.2183	2.95059e-15	2.75152e-14	-11.9195	-18.7147	-4.55627	0.00199581	0.00668726
495	PI(17:0_18:2)	1.71757	1.29936	2.1375	2.78208e-15	2.62601e-14	-18.2045	-24.2914	-11.6281	4.50696e-07	3.59628e-06
496	PI(18:0_18:1)	0.929604	0.426977	1.43475	0.000296482	0.000699625	-3.97611	-12.5656	5.45716	0.395468	0.531313
497	PI(18:0_20:2)	-0.663042	-1.08786	-0.236399	0.00240218	0.0049318	24.2436	14.6405	34.6511	1.64177e-07	1.41193e-06
498	PI(18:0_20:3) (a)	-0.0580675	-0.404632	0.289703	0.742721	0.789651	2.78567	-3.70226	9.71073	0.408214	0.543817
499	PI(18:0_20:3) (b)	-1.90091	-2.35893	-1.44074	4.46174e-15	4.01557e-14	43.0916	31.0584	56.2296	6.11739e-15	2.49203e-13
500	PI(18:0_20:4)	0.228198	0.0161767	0.440669	0.0349334	0.0558646	-2.73774	-6.52789	1.2061	0.170705	0.281118
501	PI(18:0_22:4)	-0.0618276	-0.33575	0.212848	0.65825	0.721542	11.528	5.92778	17.4242	3.66681e-05	0.000194391
502	PI(18:0_22:5) (n3)	1.47295	1.10311	1.84413	1.77467e-14	1.40163e-13	-11.4419	-17.308	-5.15976	0.000534347	0.00207832
503	PI(18:0_22:5) (n6)	-1.20078	-1.60103	-0.798902	8.40982e-09	3.59624e-08	25.9469	16.707	35.9184	4.70568e-09	5.60337e-08
504	PI(18:0_22:6)	0.772733	0.489989	1.05627	1.07281e-07	4.17265e-07	-6.90278	-11.6853	-1.86123	0.00794117	0.0225145
505	PI(18:1_18:2)	0.182245	-0.141357	0.506895	0.269481	0.330567	-13.7616	-18.8428	-8.36221	2.13172e-06	1.44733e-05
506	PI(20:0_20:4)	0.689916	0.403006	0.977645	2.78461e-06	8.98036e-06	1.29645	-3.98629	6.86985	0.636859	0.751416
507	PI(34:0)	2.07166	1.59277	2.55281	9.60463e-17	1.21869e-15	-13.1378	-20.4766	-5.1218	0.00181147	0.00625281
508	PI(34:1)	0.736401	0.375165	1.09894	6.81931e-05	0.000174773	-0.496397	-6.98468	6.44447	0.884804	0.925941
509	PI(36:2)	1.39784	0.997571	1.7997	1.41354e-11	8.1648e-11	-13.899	-20.0598	-7.26334	8.45474e-05	0.000416813
510	PI(37:6)	0.714537	0.354381	1.07599	0.000105826	0.000265939	-5.38637	-11.5392	1.19442	0.10637	0.191912
511	PI(38:5) (a)	-0.99584	-1.29289	-0.697901	1.3246e-10	7.07065e-10	1.57807	-3.99247	7.47182	0.585803	0.705151
512	PI(38:6)	0.897866	0.604169	1.19242	3.03143e-09	1.34846e-08	-10.0154	-14.8068	-4.95461	0.000167487	0.000745029
513	PI(39:6)	1.57583	1.24094	1.91183	2.75896e-19	4.85326e-18	-18.1536	-23.0729	-12.9198	4.38195e-10	5.84763e-09
514	PIP1(38:4)	0.211837	-0.149411	0.574391	0.250266	0.312429	-5.7364	-11.9143	0.874814	0.0874903	0.163175
515	LPI(18:0) [sn1]	-0.357987	-0.722369	0.00773366	0.0550194	0.0831739	10.3879	3.05201	18.2459	0.00492416	0.0147725
516	LPI(18:0) [sn2]	-0.122413	-0.608058	0.365605	0.621811	0.687546	3.15787	-5.86119	13.041	0.50477	0.629134
517	LPI(18:1) [sn1]	-0.345392	-0.698491	0.00896154	0.0560511	0.0845684	14.2601	6.89563	22.1319	9.51521e-05	0.000463193
518	LPI(18:1) [sn2]	-0.471238	-0.970186	0.0302243	0.0654076	0.096289	10.769	0.797511	21.7268	0.0336368	0.074642
519	LPI(18:2) [sn1]	0.383642	0.0538658	0.714505	0.0226431	0.0380168	0.205226	-5.7966	6.58944	0.948043	0.964238
520	LPI(18:2) [sn2]	0.370897	0.0243581	0.718637	0.0359506	0.0573727	-3.81517	-9.86088	2.63602	0.239737	0.368251
521	LPI(20:4) [sn1]	-0.863441	-1.12879	-0.597377	4.19148e-10	2.14848e-09	14.8113	9.17828	20.735	1.00962e-07	9.30293e-07
522	LPI(20:4) [sn2]	-0.679252	-0.961046	-0.396656	3.0744e-06	9.79253e-06	10.4609	4.7243	16.5117	0.000270755	0.0011147
523	PS(36:1)	0.687483	0.00557841	1.37404	0.0481548	0.0743949	1.37809	-10.7622	15.17	0.833159	0.888244
524	PS(36:2)	0.751489	0.00133509	1.50727	0.0495935	0.0764648	-5.56305	-17.9232	8.65843	0.423234	0.556168
525	PS(38:3)	0.378831	-0.406978	1.17084	0.345097	0.411564	-0.820354	-14.4232	14.9447	0.912709	0.938163
526	PS(38:4)	0.573109	-0.141452	1.29278	0.116001	0.157794	-4.75427	-16.6853	8.88533	0.475009	0.605364
527	PS(38:5)	0.307789	-0.179192	0.797145	0.215393	0.274652	-0.605497	-9.28263	8.9016	0.896153	0.930627
528	PS(40:5)	1.35776	0.522566	2.19989	0.00144254	0.00310147	-11.7064	-24.4072	3.12833	0.115919	0.207209
529	PS(40:6)	1.15826	0.362547	1.96029	0.00433228	0.00853228	-7.14325	-19.9359	7.69338	0.326521	0.465063
530	PG(34:1)	2.25869	1.64433	2.87677	1.07853e-12	6.67828e-12	-16.3289	-25.2773	-6.30887	0.00205802	0.00680729
531	PG(36:1)	1.54473	0.993031	2.09944	4.91898e-08	1.98296e-07	-9.85802	-18.62	-0.152676	0.0466844	0.0979234
532	PG(36:2)	1.85497	1.36344	2.34888	3.07799e-13	2.08979e-12	-18.7676	-25.8185	-11.0465	8.34498e-06	4.96847e-05
533	CE(14:0)	-0.406843	-0.68393	-0.128984	0.00420155	0.00829593	3.26931	-1.99233	8.81343	0.227456	0.352808
534	CE(15:0)	0.0254213	-0.310301	0.362274	0.88201	0.905405	-5.35287	-11.141	0.812327	0.0873854	0.163175
535	CE(16:0)	-0.386865	-0.608361	-0.164875	0.000669893	0.00150289	1.60766	-2.55033	5.94306	0.453753	0.591253
536	CE(16:1)	-1.43665	-1.80465	-1.06726	1.19432e-13	8.32798e-13	22.8292	14.5008	31.7633	1.42078e-08	1.57098e-07
537	CE(16:2)	-2.19185	-2.62779	-1.75397	6.73411e-21	1.4892e-19	21.4523	11.6842	32.0747	6.44632e-06	3.89801e-05
538	CE(17:0)	0.0949889	-0.336543	0.52839	0.666198	0.728301	-2.24451	-9.85924	6.01348	0.582686	0.703587
539	CE(17:1)	-0.62536	-1.02367	-0.225445	0.00225625	0.00466934	2.89176	-4.57958	10.9481	0.457958	0.59473
540	CE(18:0)	-1.44235	-1.8628	-1.02009	5.74884e-11	3.15457e-10	12.4894	3.81532	21.8881	0.00411597	0.0125424
541	CE(18:1)	-0.92642	-1.21539	-0.636603	7.51582e-10	3.70525e-09	10.7901	4.87924	17.034	0.000264073	0.00109888
542	CE(18:2)	-0.251872	-0.557535	0.0547319	0.107096	0.147495	1.11621	-4.54413	7.1122	0.705235	0.797549
543	CE(18:3)	-1.38558	-1.79877	-0.970659	1.45453e-10	7.71101e-10	25.9152	16.3728	36.2402	1.49511e-08	1.62988e-07
544	CE(20:0)	-0.558952	-0.977776	-0.138357	0.00933143	0.0170343	0.921677	-6.76506	9.24215	0.820155	0.880828
545	CE(20:1)	-1.85588	-2.30987	-1.39978	1.06582e-14	9.32782e-14	11.1305	1.86807	21.2352	0.0175501	0.0443896
546	CE(20:2)	-1.13567	-1.48731	-0.782772	5.99192e-10	2.99209e-09	13.8062	6.44376	21.6778	0.000161145	0.000725151
547	CE(20:3)	-0.41018	-0.694144	-0.125405	0.00485687	0.00948612	15.2978	9.28102	21.646	2.53295e-07	2.09763e-06
548	CE(20:4)	-0.937357	-1.31604	-0.55722	1.74872e-06	5.8341e-06	16.7662	8.66657	25.4695	2.65588e-05	0.000145791
549	CE(20:5)	-1.90115	-2.5347	-1.26348	9.77238e-09	4.15595e-08	14.4741	1.36551	29.278	0.0294281	0.0671898
550	CE(22:0)	-0.325763	-0.782894	0.133474	0.16381	0.214533	-2.49726	-10.5573	6.28908	0.565065	0.688757
551	CE(22:1)	-1.66511	-2.14361	-1.18428	3.31355e-11	1.8451e-10	5.44158	-3.78358	15.5512	0.256156	0.384234
552	CE(22:4)	-0.453075	-0.832029	-0.0726733	0.0197024	0.0333691	6.24119	-1.09874	14.1259	0.0972646	0.178395
553	CE(22:5) (n3)	0.341978	-0.0181179	0.703371	0.0626764	0.0931124	5.161	-1.70123	12.5023	0.143561	0.246378
554	CE(22:5) (n6)	-0.332973	-0.684762	0.0200628	0.0644436	0.0953716	18.3451	10.7456	26.466	8.18909e-07	5.97958e-06
555	CE(22:6)	0.468489	0.105398	0.832897	0.0114881	0.0205829	3.71255	-3.10134	11.0056	0.29254	0.427219
556	CE(24:0)	-0.348696	-0.732289	0.0363794	0.0757918	0.109933	-1.77115	-8.63084	5.60354	0.627983	0.744347
557	CE(24:1)	-1.12333	-1.55479	-0.689976	5.24649e-07	1.87133e-06	1.92867	-6.10395	10.6485	0.647789	0.761989
558	CE(24:4)	-1.90396	-2.47055	-1.33408	1.53677e-10	8.09155e-10	4.59946	-6.1769	16.6136	0.416955	0.549603
559	CE(24:5)	-1.46846	-2.09862	-0.834232	7.2002e-06	2.16847e-05	-15.5153	-25.1011	-4.70273	0.00615117	0.0178985
560	CE(24:6)	-1.59305	-2.06967	-1.1141	1.75798e-10	9.19376e-10	-3.28281	-11.7071	5.94532	0.472205	0.603114
561	COH	-0.292688	-0.522652	-0.0621928	0.0129349	0.0228576	2.87098	-1.49232	7.42755	0.200115	0.317396
562	DE(16:0)	-0.666238	-0.934429	-0.397321	1.53662e-06	5.14868e-06	6.0198	0.773969	11.5387	0.0240367	0.057421
563	DE(18:1)	-0.972732	-1.23071	-0.714085	6.23259e-13	4.0538e-12	9.85424	4.60518	15.3667	0.000179709	0.000790312
564	DE(18:2)	-0.802883	-1.13099	-0.473687	2.23155e-06	7.28784e-06	7.05516	0.600478	13.924	0.0317181	0.0715739
565	DE(20:4)	-1.72711	-2.14154	-1.31092	3.26574e-15	2.97375e-14	29.4647	19.5919	40.1526	3.29897e-10	4.72852e-09
566	DE(20:5)	-0.799849	-1.25187	-0.345753	0.000593318	0.00134277	7.57461	-1.26302	17.2033	0.0948987	0.174469
567	DE(22:6)	-0.0464639	-0.381137	0.289333	0.785602	0.826163	11.5233	4.719	18.7697	0.000712948	0.00267875
568	FA(14:0)	0.172827	-0.0364346	0.382526	0.105391	0.145717	-3.36717	-7.0867	0.501262	0.0870886	0.163175
569	FA(15:0)	0.0120033	-0.095365	0.119487	0.826366	0.862004	-0.060786	-2.05553	1.97459	0.952788	0.967792
570	FA(16:0)	0.305993	0.074585	0.537936	0.00961202	0.0174641	-4.51214	-8.56337	-0.281422	0.0368957	0.0806703
571	FA(16:1)	0.43327	-0.00376634	0.872216	0.0520052	0.0797069	-7.40288	-14.6806	0.495631	0.0654846	0.129049
572	FA(16:2)	0.0206371	-0.0922629	0.133665	0.719846	0.770624	-0.34291	-2.4333	1.79227	0.750417	0.828563
573	FA(17:0)	0.115997	0.00596519	0.22615	0.0388373	0.0613472	-1.87083	-3.87551	0.175647	0.0728455	0.141664
574	FA(17:1)	0.0649941	-0.0855043	0.215719	0.396888	0.461248	-0.32001	-3.09671	2.53626	0.82375	0.880943
575	FA(18:0)	0.0512476	-0.0326588	0.135225	0.23087	0.290558	-0.323359	-1.88075	1.25875	0.686408	0.786547
576	FA(18:1)	0.279678	-0.162207	0.723519	0.214713	0.274652	-2.86054	-10.5881	5.53485	0.491955	0.619918
577	FA(18:2)	0.395774	-0.0836359	0.877485	0.105619	0.14572	-4.48384	-12.6913	4.49517	0.316363	0.455139
578	FA(18:3)	0.139684	-0.127842	0.407926	0.305873	0.371074	-1.74331	-6.55514	3.3163	0.491787	0.619918
579	FA(20:2)	0.183779	0.05188	0.315852	0.00638352	0.0121099	-1.15543	-3.56972	1.31931	0.356373	0.494324
580	FA(20:3)	0.00243448	-0.272855	0.278484	0.986168	0.988722	1.34741	-3.76316	6.72936	0.611623	0.729424
581	FA(20:4)	-0.0754461	-0.44998	0.300497	0.693179	0.748286	1.61666	-5.29924	9.03761	0.655139	0.767137
582	FA(20:5)	0.145374	-0.052769	0.343911	0.150236	0.198435	-5.29026	-8.7464	-1.70322	0.00423108	0.0128426
583	FA(22:4)	0.436552	0.201733	0.67192	0.000280233	0.000663304	-4.23357	-8.35001	0.0677567	0.0536262	0.109516
584	FA(22:5)	0.435185	0.19103	0.679934	0.000493144	0.00113599	-5.95442	-10.1542	-1.55831	0.00853043	0.0236651
585	FA(22:6)	0.664531	0.30173	1.02864	0.000341426	0.000795974	-12.8446	-18.5554	-6.73323	7.62377e-05	0.000378256
586	AC(12:0)	0.746776	0.286682	1.20898	0.00148666	0.00318747	-16.7231	-23.5792	-9.25189	3.31202e-05	0.000178021
587	AC(13:0)	1.32843	0.812435	1.84707	5.15888e-07	1.8486e-06	-10.0013	-18.2254	-0.950249	0.0311999	0.0706104
588	AC(14:0)	0.444062	-0.0526517	0.943244	0.0797185	0.114777	-14.0959	-21.7288	-5.71874	0.00141446	0.00499903
589	AC(14:1)	0.423184	-0.0526077	0.90124	0.0812655	0.116493	-11.5953	-19.1347	-3.35284	0.00681429	0.0196069
590	AC(14:2)	0.0283714	-0.350112	0.408293	0.883209	0.905436	-11.6013	-17.6728	-5.08201	0.000710264	0.00267875
591	AC(15:0) (a)	0.906598	0.51618	1.29853	5.8815e-06	1.78521e-05	-5.59077	-12.2164	1.53494	0.120996	0.213816
592	AC(15:0) (b)	0.511964	0.150055	0.875182	0.00560301	0.0107879	-7.82574	-13.86	-1.36881	0.0184123	0.0460196
593	AC(16:0)	0.253129	-0.105613	0.613159	0.166555	0.217759	-5.21647	-11.3843	1.38063	0.118409	0.210202
594	AC(16:1)	0.646466	0.0758478	1.22034	0.0263985	0.043381	-11.3894	-20.3588	-1.40983	0.026439	0.0621999
595	AC(17:0) (a)	0.425858	0.0912108	0.761624	0.0126746	0.0225521	-5.785	-11.5066	0.306539	0.0622509	0.124181
596	AC(17:0) (b)	0.20866	-0.0779296	0.496071	0.153422	0.202297	-5.90127	-10.8263	-0.704285	0.026648	0.0623128
597	AC(18:0)	-0.177457	-0.55336	0.199868	0.355553	0.421436	-4.15144	-10.7043	2.8823	0.240096	0.368251
598	AC(18:1)	0.238074	-0.302024	0.781099	0.387708	0.452618	-1.69538	-11.1756	8.79663	0.740641	0.820109
599	AC(18:2)	0.504683	-0.0754764	1.08821	0.0881915	0.12479	-9.00181	-18.3717	1.44358	0.088731	0.164301
600	DG(14:0_16:0)	0.668973	0.386538	0.952202	3.89803e-06	1.20683e-05	-7.38032	-12.138	-2.36496	0.00445031	0.0134552
601	DG(14:0_18:2)	1.95628	1.48634	2.42839	1.15517e-15	1.18464e-14	-19.7275	-26.3951	-12.456	8.49538e-07	6.14526e-06
602	DG(16:0_16:0)	0.944616	0.627465	1.26277	7.37113e-09	3.16959e-08	-10.6621	-15.786	-5.22636	0.000195152	0.000848582
603	DG(16:0_16:1)	1.30178	0.894321	1.71088	5.74093e-10	2.88538e-09	-10.1868	-16.7305	-3.12893	0.00545301	0.016171
604	DG(16:0_18:1)	1.39103	0.934916	1.84921	3.1151e-09	1.37777e-08	-13.3938	-20.4216	-5.74536	0.000899745	0.00334809
605	DG(16:0_18:2)	2.30035	1.76786	2.83562	9.93462e-17	1.24023e-15	-25.1363	-32.1219	-17.4317	1.05655e-08	1.22055e-07
606	DG(16:0_20:4)	2.53293	1.98118	3.08766	1.33613e-18	2.15451e-17	-19.5759	-27.3222	-11.004	2.7723e-05	0.00015111
607	DG(16:0_22:5)	3.33521	2.70563	3.96865	6.3414e-24	2.7268e-22	-35.8214	-42.7767	-28.0207	1.23012e-13	3.17371e-12
608	DG(16:0_22:6)	2.6805	2.04461	3.32035	4.44894e-16	4.91925e-15	-36.7757	-43.7343	-28.9566	4.9377e-14	1.50377e-12
609	DG(16:1_18:1)	1.27274	0.85794	1.68924	2.54896e-09	1.15374e-08	-9.84742	-16.5317	-2.62783	0.00843861	0.0236437
610	DG(18:0_18:1)	0.901693	0.5037	1.30126	9.78416e-06	2.90151e-05	-6.361	-13.056	0.849506	0.082374	0.157426
611	DG(18:0_18:2)	1.5471	1.08034	2.01602	1.29871e-10	6.98054e-10	-16.6602	-23.5642	-9.13244	3.99791e-05	0.000207677
612	DG(18:0_20:4)	0.943754	0.303433	1.58816	0.00388218	0.00778447	-9.92953	-20.0702	1.49773	0.0860382	0.162821
613	DG(18:0_22:6)	0.119765	-0.071217	0.311113	0.218743	0.278008	-1.92909	-5.3816	1.64939	0.286187	0.419524
614	DG(18:1_18:1)	1.07812	0.655408	1.50262	6.67255e-07	2.3369e-06	-10.454	-17.228	-3.12571	0.00601679	0.0175921
615	DG(18:1_18:2)	1.80195	1.34254	2.26344	3.91652e-14	2.88928e-13	-21.2479	-27.6577	-14.2701	4.92909e-08	4.65258e-07
616	DG(18:1_18:3)	1.69029	1.28084	2.1014	2.05104e-15	2.0095e-14	-16.4308	-22.5258	-9.85625	4.0063e-06	2.56271e-05
617	DG(18:1_20:3)	0.99902	0.585094	1.41465	2.51075e-06	8.13106e-06	2.21533	-5.36778	10.4061	0.576866	0.698739
618	DG(18:1_20:4)	2.34321	1.88175	2.80676	4.26039e-22	1.13708e-20	-14.9218	-21.8409	-7.39018	0.000200747	0.000863211
619	DG(18:1_20:5)	2.59168	2.03418	3.15223	5.15584e-19	8.67526e-18	-29.771	-36.5988	-22.2079	2.8138e-11	5.31191e-10
620	DG(18:1_22:5)	1.92455	1.49637	2.35454	7.26674e-18	1.02263e-16	-15.5424	-21.9593	-8.59795	3.10268e-05	0.000167935
621	DG(18:1_22:6)	2.22217	1.65466	2.79286	3.9569e-14	2.88928e-13	-33.0718	-39.7126	-25.6994	1.70446e-13	4.1502e-12
622	DG(18:2_18:2)	1.95788	1.45837	2.45985	3.94522e-14	2.88928e-13	-25.8162	-32.349	-18.6525	3.99983e-10	5.52833e-09
623	DG(18:2_20:4)	3.23609	2.67558	3.79967	1.05399e-27	4.07893e-25	-26.0172	-33.2039	-18.0572	1.13657e-08	1.27493e-07
624	DG(18:2_22:6)	3.02444	2.36025	3.69293	2.11376e-18	3.2721e-17	-40.6364	-47.4228	-32.974	2.53985e-16	1.51219e-14
625	TG(48:0) [NL-16:0]	1.35186	0.846226	1.86003	1.88745e-07	7.05743e-07	-8.28355	-16.5018	0.74353	0.0709575	0.13834
626	TG(48:0) [NL-18:0]	0.938076	0.518332	1.35957	1.28171e-05	3.6879e-05	0.6963	-6.87969	8.88865	0.861742	0.910794
627	TG(48:1) [NL-16:1]	1.33161	0.818485	1.84734	4.19683e-07	1.51086e-06	-3.98206	-12.7091	5.61747	0.402632	0.537306
628	TG(48:1) [NL-18:1]	1.49343	1.0119	1.97725	1.68992e-09	7.87951e-09	-8.79159	-16.5804	-0.27551	0.0433488	0.0931998
629	TG(48:2) [NL-14:0]	2.49298	1.90949	3.0798	1.95564e-16	2.29343e-15	-19.9403	-28.076	-10.8844	5.21204e-05	0.00026716
630	TG(48:2) [NL-14:1]	2.29037	1.65707	2.92761	2.39551e-12	1.43731e-11	-16.9869	-26.1211	-6.72352	0.0017941	0.00622707
631	TG(48:2) [NL-16:1]	1.64502	1.15809	2.13429	5.78746e-11	3.15457e-10	-7.31769	-15.3061	1.42421	0.0982831	0.179837
632	TG(48:2) [NL-18:2]	2.56078	2.02516	3.09922	5.97113e-20	1.15541e-18	-22.0859	-29.3793	-14.0393	8.08142e-07	5.95716e-06
633	TG(48:3) [NL-14:0]	3.52616	2.83138	4.22564	2.97729e-22	9.21769e-21	-30.5578	-38.8028	-21.2019	2.28294e-08	2.325e-07
634	TG(48:3) [NL-16:1]	2.19414	1.67673	2.71419	3.4117e-16	3.88332e-15	-19.2067	-26.549	-11.1305	1.3058e-05	7.54248e-05
635	TG(48:3) [NL-18:3]	3.1141	2.50449	3.72733	1.92685e-22	6.48428e-21	-23.1724	-31.2645	-14.1277	4.06959e-06	2.58185e-05
636	TG(49:1) [NL-16:1]	1.02011	0.630635	1.4111	3.37768e-07	1.23317e-06	-3.04795	-9.82887	4.2429	0.402122	0.537306
637	TG(49:1) [NL-17:1]	1.61123	1.176	2.04834	8.57405e-13	5.39538e-12	-10.408	-17.3434	-2.89065	0.00759054	0.0215995
638	TG(50:0) [NL-18:0]	1.5043	0.876584	2.13592	2.8515e-06	9.12008e-06	-4.22915	-14.7556	7.59721	0.466365	0.599612
639	TG(50:1) [NL-14:0]	1.20866	0.736502	1.68303	6.0204e-07	2.13752e-06	-4.18836	-12.2393	4.60115	0.338755	0.47759
640	TG(50:1) [NL-16:0]	1.19376	0.783444	1.60574	1.54891e-08	6.411e-08	-11.445	-17.9473	-4.4274	0.00183336	0.00625281
641	TG(50:1) [NL-18:1]	1.0049	0.642525	1.36858	6.88935e-08	2.76288e-07	-10.0925	-15.9578	-3.81782	0.00204639	0.00679788
642	TG(50:2) [NL-14:0]	1.24937	0.760142	1.74098	6.37682e-07	2.24348e-06	-3.7119	-12.0798	5.45247	0.414188	0.547153
643	TG(50:2) [NL-16:1]	1.26584	0.831001	1.70255	1.5092e-08	6.28023e-08	-5.11314	-12.476	2.86917	0.202395	0.319701
644	TG(50:2) [NL-18:1]	0.962433	0.581385	1.34492	8.57923e-07	2.96443e-06	-3.877	-10.4628	3.19326	0.274321	0.406985
645	TG(50:2) [NL-18:2]	1.89204	1.4446	2.34145	4.38915e-16	4.91925e-15	-19.2646	-25.6658	-12.3122	4.87918e-07	3.81463e-06
646	TG(50:3) [NL-14:0]	3.00727	2.36843	3.6501	1.7543e-19	3.15773e-18	-25.8051	-33.9823	-16.615	6.85615e-07	5.1521e-06
647	TG(50:3) [NL-14:1]	1.82761	1.24455	2.41403	1.10049e-09	5.29054e-09	-12.2667	-21.2313	-2.28184	0.0174134	0.0443896
648	TG(50:3) [NL-16:1]	2.05291	1.55953	2.54869	1.16321e-15	1.18464e-14	-18.2338	-25.3434	-10.4471	1.63109e-05	9.28281e-05
649	TG(50:3) [NL-18:2]	2.58647	2.07525	3.10024	5.38019e-22	1.38809e-20	-23.3036	-30.1685	-15.7638	4.16435e-08	3.97927e-07
650	TG(50:3) [NL-18:3]	2.54535	2.0069	3.08664	1.45394e-19	2.74475e-18	-21.1366	-28.5571	-12.9454	2.95999e-06	1.97503e-05
651	TG(50:4) [NL-14:0]	4.18935	3.45305	4.9309	3.39451e-27	4.49251e-25	-37.0988	-44.9387	-28.1425	1.99211e-11	3.85474e-10
652	TG(50:4) [NL-18:3]	3.51521	2.87297	4.16145	2.4696e-25	1.36534e-23	-27.4048	-35.4086	-18.4092	1.051e-07	9.57028e-07
653	TG(50:4) [NL-20:4]	3.92751	3.22204	4.6378	3.72626e-26	2.88412e-24	-22.1443	-31.488	-11.5264	0.000133528	0.000618867
654	TG(51:0) [NL-16:0]	1.82297	1.36712	2.28088	1.30486e-14	1.07443e-13	-8.63338	-16.0132	-0.605069	0.0356682	0.0786529
655	TG(51:1) [NL-17:0]	2.34871	1.84357	2.85635	5.44779e-19	8.97147e-18	-16.6875	-24.0762	-8.5797	0.000125414	0.000591892
656	TG(51:2) [NL-15:0]	2.09354	1.53042	2.65977	6.34257e-13	4.09096e-12	-19.0065	-26.9931	-10.1461	7.50388e-05	0.00037471
657	TG(51:2) [NL-17:0]	2.19295	1.69196	2.69641	4.22973e-17	5.6445e-16	-15.9435	-23.3503	-7.82091	0.000237733	0.00100549
658	TG(51:2) [NL-17:1]	2.20891	1.70429	2.71604	4.20579e-17	5.6445e-16	-16.0286	-23.4782	-7.85379	0.000242078	0.00101828
659	TG(52:1) [NL-18:0]	1.34414	0.7908	1.90051	2.11733e-06	6.94413e-06	-2.99461	-12.4682	7.50436	0.56142	0.686475
660	TG(52:1) [NL-18:1]	1.35235	0.747547	1.96078	1.24088e-05	3.59717e-05	-4.93789	-15.0394	6.36463	0.376357	0.515576
661	TG(52:2) [NL-16:0]	1.07052	0.647229	1.49558	8.24098e-07	2.86032e-06	-10.2853	-17.0814	-2.93227	0.00700734	0.0200877
662	TG(52:2) [NL-18:2]	1.94125	1.41068	2.47461	1.447e-12	8.88871e-12	-14.6068	-22.5743	-5.81933	0.00162441	0.00566348
663	TG(52:3) [NL-16:1]	0.994698	0.521764	1.46986	3.95546e-05	0.000107046	-6.00293	-13.9299	2.65415	0.168096	0.277989
664	TG(52:3) [NL-18:2]	2.3112	1.83335	2.7913	2.55918e-20	5.079e-19	-22.4213	-28.9475	-15.2958	2.1873e-08	2.25729e-07
665	TG(52:4) [NL-16:1]	2.87869	2.2449	3.51642	2.64895e-18	3.94286e-17	-25.6382	-33.7821	-16.4926	7.0044e-07	5.21289e-06
666	TG(52:4) [NL-18:2]	2.89986	2.33567	3.46715	1.19812e-22	4.41593e-21	-30.6047	-37.409	-23.0608	9.52707e-12	1.94051e-10
667	TG(52:4) [NL-18:3]	3.04223	2.43041	3.65771	2.05524e-21	4.82048e-20	-25.3747	-33.2671	-16.5489	3.69616e-07	2.98003e-06
668	TG(52:5) [NL-18:3]	3.88146	3.18227	4.58539	5.09182e-26	3.58279e-24	-34.8882	-42.6402	-26.0885	6.80332e-11	1.0611e-09
669	TG(52:5) [NL-20:4]	3.66533	3.01708	4.31766	8.22626e-27	9.09589e-25	-20.5144	-29.3433	-10.5823	0.000142051	0.000654447
670	TG(52:5) [NL-20:5]	3.65138	2.89939	4.40885	1.22443e-20	2.56137e-19	-39.5458	-47.2684	-30.6922	1.48569e-12	3.1079e-11
671	TG(53:2) [NL-17:1]	1.41661	0.951989	1.88337	3.13423e-09	1.37835e-08	-7.94739	-15.549	0.338516	0.0596528	0.119306
672	TG(53:2) [NL-18:1]	1.89357	1.42155	2.36779	1.07258e-14	9.32782e-14	-15.9543	-22.9692	-8.30065	0.000100282	0.000485115
673	TG(54:0) [NL-18:0]	0.264898	-0.190273	0.722145	0.253955	0.316523	8.35404	-0.515697	18.0146	0.0655246	0.129049
674	TG(54:1) [NL-18:1]	0.61266	0.0316441	1.19705	0.0387663	0.0613472	6.65094	-4.33483	18.8983	0.245159	0.372484
675	TG(54:2) [NL-18:0]	0.811846	0.268998	1.35763	0.00339839	0.00686777	-1.16445	-10.6901	9.37724	0.820513	0.880828
676	TG(54:2) [NL-20:1]	0.829381	0.293499	1.36813	0.00243782	0.00499173	-3.65994	-12.83	6.47478	0.464384	0.598059
677	TG(54:3) [NL-18:1]	0.272175	-0.0852465	0.630875	0.135465	0.181716	-0.802757	-7.23358	6.07387	0.813378	0.876643
678	TG(54:3) [NL-18:2]	1.68749	1.1894	2.18802	5.09648e-11	2.81763e-10	-16.2476	-23.6216	-8.16162	0.000173979	0.000769483
679	TG(54:4) [NL-18:2]	1.54595	1.04874	2.0456	1.53256e-09	7.18909e-09	-16.6326	-23.9701	-8.58696	0.000117224	0.00056007
680	TG(54:4) [NL-20:3]	2.29609	1.74836	2.84677	6.91261e-16	7.53572e-15	-12.9378	-21.2836	-3.7071	0.00712845	0.0203595
681	TG(54:5) [NL-18:3]	2.15371	1.61578	2.69448	1.13694e-14	9.67024e-14	-17.6821	-25.4488	-9.10642	0.000127841	0.000599689
682	TG(54:5) [NL-20:4]	3.21289	2.62686	3.80226	2.35453e-25	1.36534e-23	-20.1879	-28.2779	-11.1853	3.91826e-05	0.000205973
683	TG(54:6) [NL-18:3]	2.96135	2.36522	3.56095	2.28801e-21	5.20858e-20	-26.8722	-34.4235	-18.4514	2.65063e-08	2.61707e-07
684	TG(54:6) [NL-20:4]	3.64249	3.02809	4.26055	4.58617e-29	3.5497e-26	-25.7593	-33.599	-16.9939	2.22024e-07	1.8679e-06
685	TG(54:6) [NL-20:5]	3.7773	3.06725	4.49223	3.61038e-24	1.74652e-22	-39.7394	-47.0254	-31.4513	5.05144e-14	1.50377e-12
686	TG(54:6) [NL-22:6]	2.52663	1.8662	3.19133	1.32026e-13	9.12397e-13	-36.0955	-43.3953	-27.8543	1.31567e-12	2.82869e-11
687	TG(54:7) [NL-20:5]	4.59794	3.77457	5.42784	2.06463e-26	1.77558e-24	-48.1509	-55.2988	-39.8601	3.41795e-17	2.40499e-15
688	TG(54:7) [NL-22:6]	3.46752	2.72983	4.21051	1.7163e-19	3.15773e-18	-40.7534	-48.1993	-32.2373	7.9788e-14	2.12951e-12
689	TG(56:6) [NL-20:4]	2.3671	1.82297	2.91413	6.14119e-17	7.92214e-16	-9.64163	-18.2435	-0.134783	0.0469999	0.0983188
690	TG(56:6) [NL-22:5](a)	2.6366	2.11821	3.15761	3.33357e-22	9.92379e-21	-20.0485	-27.2972	-12.077	4.6367e-06	2.8942e-05
691	TG(56:6) [NL-22:5](b)	2.65141	2.1339	3.17154	1.74151e-22	6.12693e-21	-20.3762	-27.5827	-12.4526	2.98964e-06	1.97776e-05
692	TG(56:7) [NL-20:4]	3.39007	2.7228	4.06167	2.84179e-22	9.16478e-21	-20.9312	-29.9796	-10.7134	0.000162758	0.000728176
693	TG(56:7) [NL-20:5]	2.83219	2.17154	3.49711	1.44566e-16	1.74834e-15	-29.6519	-37.6679	-20.6052	1.79547e-08	1.90369e-07
694	TG(56:7) [NL-22:5](a)	3.00117	2.47605	3.52898	3.48257e-27	4.49251e-25	-28.0128	-34.5982	-20.7643	4.07142e-11	6.8506e-10
695	TG(56:7) [NL-22:5](b)	2.99622	2.47215	3.52296	3.35574e-27	4.49251e-25	-27.9898	-34.5649	-20.754	3.90002e-11	6.70803e-10
696	TG(56:7) [NL-22:6]	2.61169	1.98711	3.24011	7.52161e-16	8.08573e-15	-35.029	-42.0639	-27.1399	5.05538e-13	1.18572e-11
697	TG(56:8) [NL-20:4]	3.66576	2.97519	4.36096	4.62315e-24	2.10489e-22	-24.0482	-33.0033	-13.8963	1.94521e-05	0.000109101
698	TG(56:8) [NL-20:5]	3.78698	3.02906	4.55047	1.06275e-21	2.57054e-20	-40.1197	-47.8161	-31.2882	8.12713e-13	1.81202e-11
699	TG(56:8) [NL-22:6]	3.48886	2.79916	4.1832	4.02894e-22	1.11371e-20	-44.046	-50.6461	-36.5633	1.55849e-18	1.72325e-16
700	TG(56:9) [NL-22:6]	3.88433	3.12715	4.64708	1.01131e-22	4.11974e-21	-46.8825	-53.6975	-39.0644	2.09184e-18	2.02386e-16
701	TG(58:10) [NL-22:6]	3.71661	2.97376	4.46483	9.71105e-22	2.42463e-20	-42.4658	-49.7276	-34.1552	4.71588e-15	2.02783e-13
702	TG(58:8) [NL-22:6]	2.17538	1.54742	2.80722	1.79447e-11	1.02883e-10	-32.4024	-39.7888	-24.1099	6.85466e-11	1.0611e-09
703	TG(58:9) [NL-22:6]	3.27371	2.54233	4.01032	6.80171e-18	9.74912e-17	-41.0329	-48.3972	-32.6177	3.36332e-14	1.11221e-12
704	TG(O-50:1) [NL-15:0]	0.779644	0.352698	1.20841	0.000354573	0.000824142	-4.63483	-11.9393	3.27552	0.242618	0.369717
705	TG(O-50:1) [NL-16:0]	0.973524	0.651597	1.29648	4.38526e-09	1.90685e-08	-4.34646	-9.91136	1.5622	0.145905	0.249846
706	TG(O-50:1) [NL-17:1]	0.82891	0.571347	1.08713	4.61532e-10	2.33481e-09	-5.58264	-10.0084	-0.939231	0.0191001	0.0469317
707	TG(O-50:1) [NL-18:1]	1.00026	0.692455	1.30901	3.0926e-10	1.59578e-09	-6.62875	-11.8277	-1.12328	0.0190389	0.0469317
708	TG(O-50:2) [NL-16:1]	0.724335	0.395143	1.05461	1.75282e-05	4.9878e-05	0.523149	-5.46762	6.89357	0.867601	0.913636
709	TG(O-50:2) [NL-18:1]	0.523567	0.243941	0.803972	0.000252861	0.000600352	1.94155	-3.25155	7.41338	0.470385	0.602505
710	TG(O-50:2) [NL-18:2]	1.05717	0.603939	1.51243	5.30084e-06	1.6153e-05	-4.40139	-12.1362	4.0143	0.295158	0.430098
711	TG(O-50:3) [NL-18:2]	0.777692	-0.138574	1.70236	0.0962816	0.135004	-1.20737	-16.7718	17.2678	0.889371	0.927727
712	TG(O-52:0) [NL-16:0]	1.26991	0.936168	1.60475	2.23693e-13	1.5322e-12	-3.60148	-9.39302	2.56025	0.245435	0.372484
713	TG(O-52:1) [NL-16:0]	0.915848	0.582741	1.25006	8.91676e-08	3.52121e-07	-1.3854	-7.31933	4.92846	0.65901	0.770504
714	TG(O-52:1) [NL-18:1]	0.961149	0.64876	1.27451	2.3992e-09	1.09234e-08	-3.17241	-8.64394	2.62681	0.276813	0.40888
715	TG(O-52:2) [NL-16:0]	0.633549	0.233651	1.03504	0.00192799	0.00404408	3.63325	-3.82963	11.6753	0.34871	0.488068
716	TG(O-52:2) [NL-17:1]	0.459917	0.192381	0.728167	0.000774154	0.00171689	-2.40256	-7.16739	2.60684	0.340357	0.478106
717	TG(O-52:2) [NL-18:1]	0.630023	0.354925	0.905876	7.97665e-06	2.38376e-05	-1.04835	-6.00437	4.16899	0.687225	0.786547
718	TG(O-54:2) [NL-17:1]	0.971461	0.45316	1.49244	0.000245556	0.000584801	1.16215	-8.15271	11.4217	0.814349	0.876643
719	TG(O-54:2) [NL-18:1]	0.655048	0.382496	0.928341	2.82411e-06	9.06997e-06	-0.955266	-5.86995	4.21602	0.711212	0.798952
720	TG(O-54:3) [NL-17:1]	-0.923027	-2.27355	0.446159	0.185031	0.240292	4.85026	-18.962	35.6595	0.718164	0.802105
721	TG(O-54:3) [NL-18:1]	0.541123	0.21149	0.87184	0.00131824	0.00285804	-3.96629	-9.70709	2.13951	0.197732	0.315556
722	TG(O-54:4) [NL-17:1]	1.0923	0.0517329	2.14369	0.0396292	0.0623436	-12.0422	-27.5678	6.81127	0.194924	0.314315
723	TG(O-54:4) [NL-18:2]	0.870073	0.113855	1.632	0.0241246	0.0399838	-3.61642	-16.3127	11.006	0.608725	0.728026
724	Ubiquinone	0.296275	-0.0311776	0.6248	0.0761293	0.109933	-0.167359	-6.11098	6.15252	0.957277	0.969806
725	CE(18:2) [+OH]	-0.439788	-1.21399	0.340479	0.267938	0.329704	2.84683	-11.1712	19.077	0.706872	0.797549
726	CE(20:4) [+OH]	-0.88433	-1.27614	-0.490967	1.26005e-05	3.6391e-05	7.29119	-0.39614	15.5718	0.0635053	0.126034
727	CE(22:6) [+OH]	0.126191	-0.206178	0.459666	0.456626	0.522051	-1.27793	-7.25093	5.07971	0.685812	0.786547
728	LPC(18:2) [+OH]	-1.28972	-1.81156	-0.765114	1.92147e-06	6.35563e-06	20.4116	9.00829	33.0078	0.00026798	0.00110918
729	LPC(20:4) [+OH]	-1.80802	-2.62151	-0.987728	1.93551e-05	5.4875e-05	29.9175	11.1351	51.8742	0.0010548	0.00386926
730	LPC(22:6) [+OH]	-0.996608	-1.73093	-0.256804	0.00845241	0.0156511	26.1135	9.66655	45.0271	0.00117478	0.00424895
731	PC(34:2) [+OH]	-0.6921	-1.17715	-0.204672	0.00551115	0.0106375	6.08623	-3.22879	16.2979	0.207229	0.326006
732	PC(36:4) [+OH]	-0.876777	-1.2105	-0.541925	3.96882e-07	1.44219e-06	4.77519	-1.65161	11.622	0.148349	0.252912
733	PC(38:6) [+OH]	1.33159	0.999901	1.66437	1.15854e-14	9.69545e-14	-9.304	-14.7173	-3.54715	0.00191877	0.00648878

## Sheet: 1D
1D: Association of gestational age, birth weight and gender with lipid classes at birth
		Gestational age					Birth weight
Lipid #	Lipid species	Percent difference 1	95% Lower CL2	95% Upper CL2	p-value	p-value (BH)3	Percent difference 4	95% Lower CL2	95% Upper CL2	p-value	p-value (BH)3
1	Sph	0.267573	-0.350008	0.888981	0.395985	0.461248	-1.87138	-12.6161	10.1946	0.749132	0.828326
2	S1P	-0.273118	-0.652289	0.1075	0.159051	0.208653	9.22841	1.69109	17.3244	0.0156242	0.040581
3	dhCer	-0.667863	-0.983808	-0.35091	4.13332e-05	0.000111083	9.2992	2.95502	16.0343	0.00362863	0.0112342
4	Cer	-0.271496	-0.559961	0.0178064	0.0657902	0.0966254	2.42055	-2.9995	8.14344	0.387973	0.526824
5	C1P	0.374767	-0.0347887	0.786001	0.0728699	0.106217	5.58709	-2.21289	14.0092	0.164653	0.274067
6	HexCer	-0.317953	-0.636473	0.00158745	0.0511435	0.0786979	6.31813	0.119333	12.9007	0.045636	0.096509
7	Hex2Cer	0.304989	-0.0475128	0.658733	0.0898708	0.126934	2.89858	-3.68114	9.92777	0.396082	0.531313
8	Hex3Cer	0.209618	-0.0747315	0.494777	0.148347	0.196466	0.972944	-4.27151	6.50471	0.721568	0.804746
9	GM3	-0.117732	-0.389803	0.155083	0.396664	0.461248	6.60418	1.28363	12.2042	0.0144449	0.0378994
10	GM1	0.0489195	-0.179669	0.278031	0.674688	0.73241	5.34106	0.914034	9.96229	0.0176196	0.0443896
11	SHexCer	-0.241616	-0.512935	0.0304429	0.0815938	0.116735	-3.01166	-7.84507	2.07526	0.240528	0.368251
12	SM	-0.430016	-0.727722	-0.131417	0.00486562	0.00948612	6.52855	0.706265	12.6874	0.0274942	0.0635239
13	PA	0.585383	-0.0738017	1.24892	0.0817733	0.116776	-4.43191	-15.5276	8.12122	0.470951	0.602505
14	PC	-0.171676	-0.378828	0.0359065	0.104789	0.145353	2.32707	-1.58586	6.39559	0.247021	0.373426
15	PC(O)	-0.363101	-0.653533	-0.0718195	0.0146814	0.0255881	6.78244	1.08894	12.7966	0.0189906	0.0469317
16	PC(P)	-0.283628	-0.629903	0.063853	0.109336	0.150046	0.30654	-6.03365	7.07453	0.926678	0.947489
17	LPC	-0.576118	-0.818259	-0.333386	4.03129e-06	1.24312e-05	17.4167	12.1638	22.9156	1.44172e-11	2.86127e-10
18	LPC(O)	-0.209564	-0.467678	0.0492181	0.112178	0.153403	15.4403	9.9627	21.1908	1.07777e-08	1.22676e-07
19	LPC(P)	-0.147524	-0.402771	0.108378	0.257745	0.320216	9.34212	4.21327	14.7234	0.000284363	0.00116453
20	PE	0.697898	0.364184	1.03272	4.42843e-05	0.000118193	-5.23889	-10.963	0.853247	0.0903786	0.166555
21	PE(O)	0.737543	0.377527	1.09885	6.28132e-05	0.000163146	3.30396	-3.41001	10.4846	0.342498	0.480242
22	PE(P)	0.0333964	-0.278309	0.346076	0.833637	0.86747	2.65503	-3.18566	8.84808	0.380003	0.518233
23	LPE	-0.948728	-1.20136	-0.695446	7.59511e-13	4.81854e-12	24.0245	18.2196	30.1144	1.28109e-17	1.10173e-15
24	LPE(P)	-0.37535	-0.745518	-0.00380159	0.0477132	0.0740081	13.789	6.10974	22.0241	0.000307022	0.00125071
25	PI	0.185895	-0.00612156	0.37828	0.0577467	0.0867882	-1.14148	-4.63797	2.4832	0.53145	0.655279
26	PIP1	0.211837	-0.149411	0.574391	0.250266	0.312429	-5.7364	-11.9143	0.874814	0.0874903	0.163175
27	LPI	-0.524282	-0.750894	-0.297152	7.25265e-06	2.17579e-05	10.5324	5.90058	15.3669	5.31623e-06	3.29181e-05
28	PS	0.668166	-0.0318814	1.37312	0.0613897	0.091729	-3.98633	-15.7737	9.45064	0.542121	0.664979
29	PG	1.89882	1.38909	2.41112	5.94549e-13	3.89984e-12	-16.354	-23.8684	-8.098	0.000213312	0.000912173
30	CE	-0.633546	-0.885251	-0.381203	1.11668e-06	3.80753e-06	8.03614	3.01342	13.3038	0.00150446	0.00526902
31	DE	-1.0343	-1.2986	-0.769283	9.1453e-14	6.494e-13	14.7403	9.12301	20.6468	1.0768e-07	9.69123e-07
32	FFA	0.210949	-0.0146966	0.437103	0.0668693	0.097839	-2.80061	-6.82754	1.40036	0.187846	0.305448
33	AC	0.391616	-0.0241581	0.80912	0.0648632	0.0958093	-7.68628	-14.6044	-0.20772	0.0442089	0.094524
34	DG	1.44412	1.05996	1.82974	4.06312e-13	2.71108e-12	-14.9763	-20.8207	-8.7005	9.20474e-06	5.43853e-05
35	TG	1.75141	1.35151	2.15288	4.56005e-17	5.98217e-16	-16.038	-22.0201	-9.59697	4.20147e-06	2.64385e-05
36	TG(O)	0.856526	0.585224	1.12856	9.51653e-10	4.60362e-09	-3.26604	-8.03523	1.75048	0.197592	0.315556
37	Lipid(ox)	-0.610633	-1.07203	-0.147085	0.00996939	0.0179867	6.32393	-2.56834	16.0278	0.168445	0.277989

## Sheet: 1E
1E: Effect of mode of delivery and duration of labour on newborn cord serum lipid species
		Assisted vaginal delivery (AVB)					Scheduled Caesarean (SC)					Unscheduled caesarean (USC)					Duration of labour
Lipid #	Lipid species	Percent difference 1	95% Lower CL2	95% Upper CL2	p-value	p-value (BH)3	Percent difference 4	95% Lower CL2	95% Upper CL2	p-value	p-value (BH)3	Percent difference 5	95% Lower CL2	95% Upper CL2	p-value	p-value (BH)3	Percent difference 6	95% Lower CL2	95% Upper CL2	p-value	p-value (BH)3
1	Sph(d16:1)	3.38921	-1.79314	8.84502	0.203536	0.427239	-12.6198	-17.4774	-7.47615	4.45883e-06	0.000150049	-6.86653	-13.2077	-0.0621002	0.0480221	0.254583	-0.0688412	-0.405583	0.269039	0.688791	0.894504
2	Sph(d18:1)	17.3818	1.45655	35.8068	0.03127	0.121623	-31.6445	-41.8775	-19.6099	4.99887e-06	0.000161213	-13.4836	-29.1613	5.66385	0.155324	0.440437	0.122809	-0.830814	1.0856	0.801225	0.945344
3	Sph(d18:2)	0.135825	-2.24833	2.57813	0.91195	0.960339	-0.326551	-2.96255	2.38106	0.810662	0.910795	-0.715742	-3.94279	2.61972	0.669572	0.862075	-0.00217704	-0.160219	0.156115	0.978443	0.999552
4	S1P(d16:1)	2.74182	-2.88828	8.69833	0.346252	0.58515	-16.079	-21.178	-10.6501	5.91112e-08	2.8595e-06	-8.90553	-15.6801	-1.58666	0.0180865	0.162181	-0.266764	-0.635016	0.102853	0.156658	0.505159
5	S1P(d18:0)	12.7365	2.27388	24.2695	0.0159355	0.0783986	4.48142	-6.24583	16.4361	0.427066	0.677355	-5.05625	-16.9264	8.51001	0.445774	0.720311	-0.0483904	-0.685357	0.592661	0.881846	0.965127
6	S1P(d18:1)	7.91335	-2.92447	19.9611	0.158116	0.365319	1.74387	-9.55535	14.4547	0.773117	0.901194	-10.3267	-22.4408	3.67945	0.140742	0.415779	-0.247827	-0.938416	0.447577	0.483272	0.782536
7	S1P(d18:2)	2.95047	-3.96183	10.3603	0.41159	0.641226	-4.89109	-11.9664	2.7529	0.203147	0.424962	-7.16168	-15.601	2.12155	0.126214	0.392329	-0.218737	-0.672905	0.237508	0.346212	0.68846
8	Cer(d18:0/16:0)	11.5489	4.66479	18.8859	0.000801769	0.00850095	0.194159	-6.65912	7.55061	0.957138	0.982717	6.36858	-2.52839	16.0776	0.165602	0.451723	0.169048	-0.248907	0.588754	0.427875	0.750963
9	Cer(d18:0/18:0)	19.4725	10.1552	29.5778	1.96875e-05	0.00163669	9.73703	0.26097	20.1087	0.043765	0.154862	17.5547	5.16867	31.3995	0.00448359	0.0773964	0.813989	0.278125	1.35272	0.00292988	0.0527379
10	Cer(d18:0/20:0)	9.64369	3.32346	16.3505	0.00242669	0.0201963	4.39933	-2.27213	11.5262	0.200891	0.424962	10.0374	1.4339	19.3705	0.0213753	0.18046	0.319568	-0.0706219	0.711282	0.108379	0.41323
11	Cer(d18:0/22:0)	8.49554	1.53663	15.9314	0.0160039	0.0783986	5.84014	-1.68281	13.9387	0.131088	0.3232	5.61792	-3.55921	15.6683	0.238094	0.540898	0.490769	0.0544692	0.928971	0.0275034	0.208701
12	Cer(d18:0/24:0)	8.74749	0.575587	17.5834	0.0354274	0.133111	0.887229	-7.50868	10.0453	0.841814	0.925823	4.75254	-5.88845	16.5967	0.394956	0.674997	0.570397	0.0560306	1.08741	0.029761	0.212815
13	Cer(d18:0/24:1)	10.1211	1.41949	19.5693	0.02178	0.0985833	6.43946	-2.87293	16.6447	0.181186	0.396153	13.4331	1.32553	26.9874	0.0286887	0.203716	0.894878	0.351205	1.4415	0.00126978	0.0345461
14	Cer(d16:1/16:0)	8.11475	-0.253083	17.1846	0.05763	0.187016	-2.90383	-11.2253	6.19767	0.518574	0.755888	4.98339	-5.99583	17.2449	0.387575	0.672608	0.0543521	-0.473303	0.584805	0.840122	0.957607
15	Cer(d16:1/18:0)	11.6986	1.993	22.3279	0.0171446	0.0834584	-0.467982	-10.0391	10.1215	0.927427	0.971094	11.8483	-1.25932	26.6959	0.0781972	0.325401	0.519126	-0.0788427	1.12067	0.0888386	0.382006
16	Cer(d16:1/20:0)	5.12079	-2.89262	13.7955	0.216594	0.443502	-4.31637	-12.3937	4.50565	0.326218	0.572545	6.23823	-4.70716	18.4408	0.274807	0.577992	0.380672	-0.140417	0.90448	0.152172	0.505159
17	Cer(d16:1/22:0)	5.79346	-1.47854	13.6022	0.120914	0.310922	-2.33369	-9.77126	5.71696	0.558432	0.77599	10.7353	0.432988	22.0944	0.0407191	0.238496	0.3039	-0.163867	0.773858	0.202835	0.548932
18	Cer(d16:1/23:0)	1.38442	-4.52349	7.65791	0.653044	0.819216	-4.09023	-10.2858	2.53323	0.219844	0.45135	7.01315	-1.44414	16.1962	0.106418	0.364459	0.215269	-0.178891	0.610985	0.284306	0.641663
19	Cer(d16:1/24:0)	3.23444	-3.11962	10.0052	0.325444	0.565976	-3.68469	-10.2552	3.36682	0.297118	0.544647	9.84303	0.679638	19.8404	0.0347027	0.218373	0.22375	-0.193285	0.642528	0.2929	0.649685
20	Cer(d16:1/24:1)	7.99651	0.359848	16.2143	0.0398186	0.143347	-2.59381	-10.2238	5.6846	0.527128	0.762611	10.8398	0.235594	22.5658	0.0448912	0.244733	0.229294	-0.252022	0.712932	0.350453	0.690206
21	Cer(d17:1/16:0)	2.2687	-4.7567	9.81232	0.536101	0.734411	-5.83831	-13.0046	1.91832	0.136089	0.331236	-0.387299	-9.6492	9.82404	0.937779	0.9717	-0.105698	-0.571259	0.362043	0.656758	0.879988
22	Cer(d17:1/18:0)	6.16094	-0.00218598	12.7039	0.0500835	0.172287	0.635232	-5.84141	7.55736	0.851761	0.925823	2.12043	-5.92036	10.8484	0.61551	0.835432	0.128713	-0.263593	0.522561	0.520133	0.797402
23	Cer(d17:1/20:0)	7.94379	0.871505	15.5119	0.0271078	0.111797	1.21357	-6.13453	9.13689	0.753383	0.892983	8.81264	-0.84266	19.4081	0.0747536	0.319665	0.185504	-0.259119	0.632109	0.413487	0.735721
24	Cer(d17:1/22:0)	2.65507	-3.25064	8.92126	0.385418	0.616351	-1.52494	-7.80543	5.1834	0.647151	0.832003	6.87056	-1.46899	15.916	0.108752	0.365973	0.160101	-0.228678	0.550396	0.419497	0.741303
25	Cer(d17:1/23:0)	1.43501	-5.06172	8.37631	0.672622	0.823062	-6.85376	-13.465	0.262575	0.0587087	0.190927	4.12371	-4.91079	14.0166	0.382255	0.669379	0.296719	-0.138095	0.733426	0.180983	0.515824
26	Cer(d17:1/24:0)	5.25976	-0.578864	11.4413	0.0782166	0.228291	-4.84004	-10.6924	1.39583	0.1253	0.314878	9.97766	1.6998	18.9293	0.0172994	0.162181	0.0964897	-0.277746	0.47213	0.613272	0.857671
27	Cer(d17:1/24:1)	6.80891	-0.106373	14.2029	0.0537434	0.179323	-2.91743	-9.88269	4.58618	0.435071	0.685535	8.60784	-0.916897	19.0482	0.077763	0.325401	0.151886	-0.287171	0.592876	0.497756	0.792422
28	Cer(d18:1/14:0)	1.7329	-5.46935	9.48389	0.646013	0.814927	-0.822322	-8.60017	7.6174	0.842666	0.925823	7.67121	-2.64183	19.0767	0.149904	0.429726	0.305444	-0.176827	0.790044	0.214439	0.572767
29	Cer(d18:1/16:0)	8.39064	1.09766	16.2097	0.0234577	0.103161	1.62539	-5.95068	9.81175	0.682885	0.855264	9.26833	-0.685337	20.2196	0.068872	0.308353	0.183721	-0.273277	0.642813	0.430731	0.752333
30	Cer(d18:1/17:0)	8.09603	0.278619	16.5229	0.0421174	0.150654	9.85043	1.05099	19.4161	0.027494	0.110835	13.6383	2.52278	25.959	0.0150071	0.14743	-0.5205	-1.00946	-0.0291227	0.0379484	0.250167
31	Cer(d18:1/18:0)	10.9611	2.61203	19.9896	0.00924753	0.0538165	6.76941	-2.12754	16.4751	0.13979	0.334977	9.85575	-1.31795	22.2946	0.085761	0.333563	0.479303	-0.0352925	0.996547	0.0679079	0.343534
32	Cer(d18:1/19:0)	-2.35887	-9.21018	5.00946	0.519546	0.721244	-2.77987	-10.3369	5.4141	0.494075	0.727545	5.23302	-4.75836	16.2726	0.3157	0.62176	0.0712227	-0.405509	0.550236	0.769761	0.929029
33	Cer(d18:1/20:0)	8.05334	0.531786	16.1376	0.0354206	0.133111	5.09886	-3.00583	13.8808	0.224056	0.457572	10.9181	0.469642	22.4531	0.040125	0.237542	0.474409	-0.000301212	0.951373	0.0501454	0.288877
34	Cer(d18:1/21:0)	3.39669	-4.11038	11.4915	0.384461	0.616093	-2.20481	-10.0694	6.34752	0.601665	0.80153	9.96178	-0.835978	21.9353	0.0716667	0.31273	0.166828	-0.327525	0.663634	0.508421	0.792422
35	Cer(d18:1/22:0)	8.90524	1.66738	16.6584	0.0151359	0.0768789	7.82405	-0.11605	16.3953	0.053569	0.179491	12.4209	2.30391	23.5385	0.0150478	0.14743	0.459562	0.0071033	0.914068	0.0465137	0.278238
36	Cer(d18:1/23:0)	5.12418	-2.80531	13.7006	0.211272	0.434906	-8.54529	-16.1849	-0.209386	0.0447602	0.157475	11.7402	0.347104	24.4268	0.0430836	0.239904	0.399985	-0.115524	0.918155	0.128297	0.459731
37	Cer(d18:1/24:0)	7.75824	0.913012	15.0678	0.0257272	0.110016	4.61257	-2.75197	12.5348	0.225532	0.458168	12.3196	2.65276	22.8968	0.0114905	0.130789	0.48624	0.0542825	0.920063	0.0273909	0.208701
38	Cer(d18:1/24:1)	10.343	2.17317	19.1661	0.0122405	0.0648913	10.9994	1.89724	20.9147	0.0169126	0.079819	15.846	4.24869	28.7334	0.00635449	0.0927995	0.532956	0.0266218	1.04185	0.0391198	0.252323
39	Cer(d18:1/26:0)	9.97606	3.15965	17.2429	0.00364766	0.027147	5.27356	-1.95813	13.0387	0.156644	0.362983	2.18864	-6.39518	11.5596	0.628115	0.839656	0.0924163	-0.327077	0.513676	0.665921	0.884087
40	Cer(d18:2/14:0)	4.84006	-0.861331	10.8693	0.097415	0.271562	1.82795	-4.31217	8.36206	0.567517	0.782991	1.95087	-5.57401	10.0754	0.620856	0.837182	0.0215855	-0.344848	0.389366	0.908093	0.981653
41	Cer(d18:2/16:0)	8.0504	0.186669	16.5314	0.0446248	0.158439	0.0405291	-8.02376	8.81188	0.992448	0.998212	5.30449	-5.06033	16.8009	0.327635	0.627578	0.221297	-0.274551	0.719612	0.38175	0.717171
42	Cer(d18:2/17:0)	3.12872	-8.71142	16.5045	0.619974	0.798436	4.11218	-9.09395	19.2368	0.559782	0.776472	3.01558	-12.8479	21.7666	0.727264	0.889043	0.642569	-0.159835	1.45142	0.116598	0.429745
43	Cer(d18:2/18:0)	14.0293	4.93962	23.9062	0.00200137	0.0175282	6.90262	-2.5321	17.2506	0.156476	0.362983	9.41	-2.36916	22.6103	0.121535	0.382391	0.407	-0.138988	0.955973	0.143994	0.488854
44	Cer(d18:2/20:0)	9.89248	1.85834	18.5603	0.0149677	0.0768789	4.9677	-3.53207	14.2164	0.259933	0.499226	11.6796	0.638047	23.9326	0.0375916	0.23092	0.34651	-0.152297	0.847809	0.173306	0.515824
45	Cer(d18:2/21:0)	0.832986	-3.88912	5.7871	0.734218	0.868937	-2.4536	-7.52106	2.89154	0.360792	0.619186	4.22085	-2.41309	11.3058	0.217485	0.508561	-0.147995	-0.461857	0.166857	0.355895	0.690382
46	Cer(d18:2/22:0)	7.50527	0.141896	15.4101	0.0456082	0.159732	3.34943	-4.49304	11.8359	0.412594	0.662547	7.63589	-2.34291	18.6344	0.137968	0.410721	0.251524	-0.214279	0.719501	0.289859	0.646544
47	Cer(d18:2/23:0)	4.35983	-3.81715	13.232	0.304748	0.549824	-9.38244	-17.2441	-0.77388	0.0334096	0.128925	8.44238	-3.03652	21.2802	0.155348	0.440437	0.320646	-0.215204	0.859374	0.240881	0.59757
48	Cer(d18:2/24:0)	7.5938	-0.501102	16.3473	0.0665868	0.209505	2.00295	-6.49594	11.2743	0.654528	0.833231	10.4383	-0.7935	22.9418	0.069554	0.309395	0.322505	-0.191233	0.838886	0.218535	0.572767
49	Cer(d18:2/24:1)	6.6035	-0.958627	14.743	0.0883705	0.247822	5.45853	-2.82832	14.4521	0.202648	0.424962	10.6424	0.0239422	22.3882	0.0494606	0.25693	0.435544	-0.0483497	0.92178	0.0776899	0.345409
50	Cer(d18:2/26:0)	5.12337	-2.39456	13.2204	0.186519	0.408969	2.91367	-5.23887	11.7676	0.494585	0.727545	7.7733	-2.65299	19.3163	0.148992	0.428699	0.240904	-0.24613	0.730315	0.332311	0.672723
51	Cer(d19:1/16:0)	9.25095	-0.64664	20.1345	0.0677803	0.210691	2.32906	-7.92823	13.7291	0.668734	0.848525	15.4695	1.37098	31.5288	0.0304539	0.209779	0.030627	-0.590959	0.6561	0.923168	0.986356
52	Cer(d19:1/18:0)	16.2131	5.17683	28.4074	0.00322648	0.0260135	-0.457884	-10.9145	11.2261	0.935299	0.971449	10.3637	-3.74935	26.5462	0.157459	0.443047	0.39573	-0.259672	1.05544	0.236764	0.593059
53	Cer(d19:1/20:0)	4.5152	-1.74451	11.1737	0.160741	0.369179	-1.05346	-7.62236	5.98254	0.762159	0.89797	8.76931	-0.0630571	18.3823	0.0517253	0.25997	0.222996	-0.182479	0.630117	0.280966	0.64117
54	Cer(d19:1/22:0)	9.07832	1.69833	16.9938	0.0151409	0.0768789	3.4669	-4.2891	11.8514	0.390665	0.643351	11.4556	1.24711	22.6935	0.0269772	0.198951	0.460307	-0.000581268	0.92332	0.0502894	0.288877
55	Cer(d19:1/23:0)	5.66972	-2.75108	14.8197	0.192656	0.411922	-8.06238	-16.174	0.834164	0.0743921	0.225802	13.3886	1.18461	27.0645	0.0306266	0.209779	0.344458	-0.201023	0.892921	0.215849	0.572767
56	Cer(d19:1/24:0)	6.23086	-1.2547	14.2839	0.104777	0.285554	-5.06967	-12.4798	2.96786	0.209163	0.434202	8.49145	-1.85229	19.9253	0.110685	0.367683	0.214989	-0.264517	0.696801	0.379539	0.717171
57	Cer(d19:1/24:1)	10.7376	1.43636	20.8918	0.0227704	0.10071	3.81156	-5.83989	14.4523	0.451815	0.699409	18.6992	5.24494	33.8733	0.00530113	0.0830033	0.440114	-0.136619	1.02018	0.134737	0.474029
58	Cer(d19:1/26:0)	7.0475	-0.123574	14.7335	0.0542139	0.179323	-2.0875	-9.35495	5.76261	0.591312	0.794576	-4.37209	-13.0456	5.16654	0.356153	0.646772	-0.0739117	-0.527673	0.381919	0.74979	0.924374
59	Cer(d20:1/22:0)	4.68925	-1.565	11.3409	0.144525	0.346324	9.3093	2.07076	17.0612	0.0109769	0.0647977	7.78702	-0.94366	17.2872	0.08176	0.327887	0.17937	-0.224871	0.585249	0.384387	0.717746
60	Cer(d20:1/23:0)	4.78568	-2.33006	12.4198	0.192213	0.411922	-2.89749	-10.2032	5.00258	0.46063	0.70086	11.3885	1.14894	22.6647	0.0284329	0.203716	-0.167348	-0.627105	0.294537	0.476354	0.782417
61	Cer(d20:1/24:0)	12.7853	5.56219	20.5026	0.000385751	0.00504903	8.45016	0.753343	16.735	0.0308478	0.121199	3.04956	-5.89099	12.8395	0.515897	0.772349	-0.0378412	-0.471167	0.397371	0.864198	0.965127
62	Cer(d20:1/24:1)	10.8156	3.02071	19.2003	0.00586464	0.0378269	11.3864	2.70694	20.7994	0.00926804	0.057871	14.8875	3.95297	26.9723	0.00661552	0.0940672	0.226457	-0.252233	0.707444	0.353812	0.690382
63	Cer(d20:1/26:0)	3.20398	-3.31668	10.1644	0.343	0.582197	2.60152	-4.58274	10.3267	0.48743	0.724129	-5.61604	-13.6961	3.22047	0.205153	0.498194	-0.00803467	-0.435484	0.42125	0.970628	0.999552
64	Cer(m18:0/20:0)	3.21759	-4.29977	11.3255	0.41111	0.641226	4.60726	-3.83115	13.7861	0.293323	0.540552	10.5435	-0.344636	22.6213	0.0581042	0.281079	0.40055	-0.0965533	0.900126	0.11424	0.42307
65	Cer(m18:0/22:0)	6.13936	-1.51312	14.3864	0.118395	0.308545	-0.308629	-8.27002	8.34375	0.941878	0.974617	11.1918	0.348274	23.207	0.0427499	0.239904	0.259847	-0.231393	0.753505	0.299845	0.655594
66	Cer(m18:0/23:0)	2.88951	-4.55129	10.9104	0.456399	0.679333	-12.1769	-19.2118	-4.52947	0.00235756	0.0225861	6.80201	-3.64471	18.3813	0.20976	0.499747	-0.00937093	-0.500839	0.484525	0.970215	0.999552
67	Cer(m18:0/24:0)	6.90536	-0.864549	15.2842	0.0827341	0.237171	1.3732	-6.78755	10.2484	0.749719	0.891371	10.5675	-0.300895	22.6207	0.0570328	0.277631	0.404009	-0.0920502	0.902531	0.110397	0.414792
68	Cer(m18:0/24:1)	7.13876	-1.63321	16.693	0.113413	0.300623	-0.277442	-9.31599	9.66199	0.954222	0.982677	18.6502	5.53537	33.3948	0.00428749	0.0773964	0.544092	-0.018076	1.10942	0.0578321	0.310848
69	Cer(m18:1/18:0)	16.2575	6.69698	26.6746	0.000606051	0.0069583	1.23872	-7.97746	11.3779	0.800108	0.90911	11.3269	-1.03174	25.2289	0.073822	0.317435	0.560005	-0.00483035	1.12803	0.0519908	0.289503
70	Cer(m18:1/20:0)	8.56818	0.468513	17.3208	0.0377369	0.137775	3.63256	-4.92998	12.9663	0.416766	0.665107	9.47744	-1.56458	21.7581	0.0949187	0.343304	0.458381	-0.0515751	0.970939	0.0780964	0.345409
71	Cer(m18:1/22:0)	6.98143	-1.87052	16.6319	0.125415	0.316144	1.26084	-8.01396	11.4708	0.797911	0.908211	8.22793	-3.85967	21.8353	0.190284	0.480688	0.272426	-0.294413	0.842488	0.346312	0.68846
72	Cer(m18:1/23:0)	5.59003	-4.28669	16.4859	0.277126	0.520183	-9.56914	-18.9266	0.868401	0.0710333	0.218693	11.476	-2.56904	27.5456	0.113633	0.369617	0.21321	-0.4307	0.861285	0.516646	0.794998
73	Cer(m18:1/24:0)	4.62221	-3.58136	13.5238	0.277566	0.520183	-0.833423	-9.44312	8.59485	0.856446	0.925823	5.54833	-5.63233	18.0537	0.343946	0.636877	0.138689	-0.396599	0.676853	0.611749	0.857671
74	Cer(m18:1/24:1)	7.16335	-1.62758	16.7399	0.112943	0.300404	2.23255	-7.0513	12.4437	0.648914	0.832003	17.6634	4.63296	32.3167	0.00668436	0.0940672	0.580584	0.0170821	1.14726	0.0434511	0.265321
75	Cer1P(d18:1/16:0)	-2.34487	-10.1959	6.19255	0.578401	0.767894	-12.5809	-20.3618	-4.03974	0.00477261	0.0362157	-4.94991	-15.2693	6.62629	0.38599	0.671363	-0.195124	-0.742671	0.355444	0.485897	0.783509
76	HexCer(d16:1/18:0)	0.310544	-9.93031	11.7158	0.954923	0.973687	5.26148	-6.62051	18.6554	0.400795	0.64763	-4.66421	-17.7519	10.506	0.525484	0.775875	-0.0562499	-0.760204	0.652697	0.87582	0.965127
77	HexCer(d16:1/20:0)	-0.452401	-10.163	10.3078	0.930889	0.96763	-1.63646	-12.2484	10.2588	0.776614	0.902552	-3.6281	-16.2804	10.9364	0.606257	0.831225	-0.054187	-0.725263	0.621425	0.874503	0.965127
78	HexCer(d16:1/22:0)	-3.84082	-11.7194	4.74094	0.368587	0.601039	-0.878138	-9.86861	9.00912	0.855497	0.925823	-5.79241	-16.2128	5.92396	0.317844	0.623747	-0.196775	-0.755215	0.364806	0.490823	0.78822
79	HexCer(d16:1/24:0)	-5.03855	-12.0557	2.53849	0.18646	0.408969	-4.7928	-12.5847	3.69362	0.259053	0.49878	-8.88047	-17.9847	1.23439	0.0832452	0.332123	-0.18231	-0.684015	0.321929	0.477218	0.782417
80	HexCer(d18:1/16:0)	-0.101898	-7.04635	7.36137	0.977839	0.986763	-2.12688	-9.66419	6.03931	0.598479	0.800039	0.627753	-8.83869	11.0772	0.90104	0.968297	0.154002	-0.318532	0.628776	0.523031	0.800052
81	HexCer(d18:1/18:0)	-0.392839	-8.94155	8.95844	0.931375	0.96763	1.95025	-7.73367	12.6506	0.704022	0.863571	-10.5614	-20.9163	1.1492	0.0753271	0.320347	0.0329809	-0.554472	0.623905	0.91248	0.982281
82	HexCer(d18:1/20:0)	-1.62689	-8.9511	6.28651	0.677291	0.826008	0.435801	-7.84588	9.46174	0.920978	0.967215	-12.1887	-21.0278	-2.36031	0.0164276	0.156975	-0.0524744	-0.558772	0.456401	0.839215	0.957607
83	HexCer(d18:1/22:0)	-3.58333	-10.3363	3.67823	0.324051	0.564899	-0.0772152	-7.83013	8.32784	0.98502	0.997913	-9.93624	-18.4719	-0.506947	0.0394315	0.237542	-0.0486715	-0.523927	0.428855	0.841074	0.957607
84	HexCer(d18:1/24:0)	-3.79697	-10.4641	3.36657	0.290243	0.537435	-1.00338	-8.60393	7.22923	0.804269	0.910094	-11.7595	-20.0355	-2.62699	0.0128726	0.139656	-0.0902862	-0.560173	0.381821	0.706818	0.900424
85	HexCer(d18:1/24:1)	-5.22683	-11.6978	1.71829	0.136532	0.332314	-0.94712	-8.44004	7.15899	0.812268	0.910795	-4.48881	-13.3161	5.23738	0.35268	0.645733	0.0490942	-0.414258	0.514602	0.835563	0.957607
86	HexCer(d18:2/18:0)	3.2592	-6.33769	13.8394	0.518698	0.721244	8.49593	-2.65943	20.9297	0.140458	0.335538	-6.98956	-18.6344	6.32191	0.287804	0.594027	-0.15082	-0.788093	0.490546	0.643552	0.87082
87	HexCer(d18:2/20:0)	-6.46777	-16.2621	4.47213	0.235627	0.470437	6.29331	-6.01166	20.2093	0.330317	0.575822	-9.15283	-21.9383	5.72669	0.214384	0.50489	-0.00742805	-0.730801	0.721216	0.983975	0.999552
88	HexCer(d18:2/22:0)	-3.69609	-10.7886	3.96026	0.333996	0.572674	1.51554	-6.76489	10.5314	0.728569	0.881113	-6.78908	-16.0715	3.51996	0.188584	0.480688	-0.20564	-0.705484	0.296721	0.421057	0.742365
89	HexCer(d18:2/24:0)	-4.32866	-10.8035	2.61622	0.215395	0.442217	-0.737721	-8.18078	7.30869	0.852056	0.925823	-8.55025	-16.9289	0.673483	0.0682341	0.308353	-0.199678	-0.657683	0.260437	0.393764	0.723729
90	Hex2Cer(d16:1/16:0)	-0.542107	-7.80437	7.29221	0.888073	0.947369	-6.62441	-14.1762	1.59185	0.11098	0.292721	9.70967	-1.12388	21.7302	0.0805533	0.327887	0.184559	-0.312803	0.684403	0.467114	0.779194
91	Hex2Cer(d16:1/24:1)	-0.0981295	-8.63087	9.23146	0.982777	0.987422	3.6029	-6.19087	14.4192	0.484178	0.720681	6.28393	-5.96296	20.1258	0.328629	0.627578	0.489262	-0.0979089	1.07988	0.102435	0.41294
92	Hex2Cer(d18:1/16:0)	4.50783	-3.09139	12.703	0.251819	0.489718	-2.87461	-10.6971	5.63305	0.49537	0.727545	2.65011	-7.44471	13.8459	0.619912	0.837182	0.258936	-0.236648	0.756981	0.305807	0.659316
93	Hex2Cer(d18:1/18:0)	-3.91244	-11.1844	3.95496	0.319654	0.561458	2.06403	-6.49003	11.4006	0.646833	0.832003	-3.03873	-12.9574	8.01016	0.57459	0.808962	-0.507167	-1.01978	0.00810429	0.053692	0.29684
94	Hex2Cer(d18:1/20:0)	-1.7558	-9.31524	6.4338	0.664074	0.821756	6.73418	-2.36009	16.6755	0.151172	0.355438	-7.53735	-17.1515	3.19246	0.161489	0.446401	0.105701	-0.419022	0.633189	0.693131	0.895585
95	Hex2Cer(d18:1/22:0)	2.54336	-5.2194	10.9419	0.53116	0.731551	10.201	0.962351	20.285	0.02974	0.118045	-5.56782	-15.2304	5.19622	0.297688	0.601594	0.533628	0.0154977	1.05444	0.0435346	0.265321
96	Hex2Cer(d18:1/24:0)	2.43941	-6.40533	12.12	0.60033	0.786054	12.864	2.07916	24.7882	0.0182842	0.0827849	-4.87329	-15.9519	7.6656	0.428412	0.704015	0.831961	0.236094	1.43137	0.00622823	0.086083
97	Hex2Cer(d18:1/24:1)	5.96328	-2.87354	15.6041	0.191926	0.411922	9.32269	-0.769062	20.4408	0.0712025	0.218693	6.11287	-5.83041	19.5709	0.329506	0.627578	0.853853	0.279044	1.43196	0.00361714	0.0583264
98	Hex2Cer(d18:2/16:0)	-0.306958	-7.04745	6.92232	0.931299	0.96763	-0.8214	-8.25099	7.20981	0.835271	0.925823	5.88249	-3.80919	16.5506	0.242699	0.541651	0.26145	-0.198208	0.723225	0.264876	0.623142
99	Hex2Cer(d18:2/24:1)	-0.638811	-7.47115	6.69803	0.859824	0.934644	14.0599	5.37076	23.4655	0.0011757	0.0132387	7.08679	-2.87965	18.076	0.169172	0.456234	0.416959	-0.0515111	0.887624	0.0810549	0.356457
100	Hex3Cer(d18:1/16:0)	1.19157	-4.07163	6.74354	0.663325	0.821756	-0.655023	-6.38519	5.42589	0.828086	0.922022	-0.397139	-7.43159	7.17188	0.91506	0.968297	-0.0642085	-0.413969	0.286781	0.719124	0.905044
101	Hex3Cer(d18:1/18:0)	-5.24931	-12.2343	2.29161	0.167217	0.379547	2.21951	-6.12656	11.3076	0.612914	0.809549	-5.06834	-14.5314	5.4424	0.331041	0.628005	-0.693102	-1.19102	-0.192679	0.00676981	0.0890661
102	Hex3Cer(d18:1/20:0)	1.09803	-6.77796	9.63944	0.791532	0.906281	-0.0473169	-8.66943	9.38877	0.991782	0.998212	-8.3598	-18.0054	2.42046	0.123694	0.387608	-0.489912	-1.01827	0.0412632	0.0705254	0.345409
103	Hex3Cer(d18:1/22:0)	0.326425	-6.34078	7.46823	0.925874	0.96763	2.64345	-4.91459	10.8023	0.50314	0.737557	-4.91235	-13.4689	4.49028	0.294542	0.600838	-0.30705	-0.756021	0.143952	0.181384	0.515824
104	Hex3Cer(d18:1/24:0)	0.806677	-6.49119	8.67411	0.833758	0.924706	-3.03956	-10.8145	5.41323	0.468564	0.708338	-2.30189	-11.8681	8.30264	0.657313	0.85624	-0.403343	-0.893411	0.0891479	0.108107	0.41323
105	Hex3Cer(d18:1/24:1)	-0.990152	-7.5598	6.0464	0.77601	0.895129	1.6643	-5.81024	9.73199	0.671346	0.850445	-0.97692	-9.87414	8.79863	0.837799	0.945272	-0.112155	-0.561294	0.339013	0.624985	0.862278
106	GM3(d18:1/16:0)	-0.5407	-5.32211	4.48218	0.828963	0.924706	-0.351988	-5.66566	5.26099	0.899477	0.952259	-2.14386	-8.53648	4.69557	0.528923	0.775875	0.0261197	-0.29683	0.350116	0.874031	0.965127
107	GM3(d18:1/18:0)	-1.36314	-7.00766	4.624	0.64752	0.814927	1.22241	-5.19927	8.07908	0.715933	0.872649	-5.96356	-13.2632	1.95043	0.13558	0.407126	-0.32445	-0.709245	0.0618354	0.0994514	0.409443
108	GM3(d18:1/20:0)	0.145297	-6.28906	7.02144	0.965763	0.978404	-6.16987	-12.8506	1.02297	0.090913	0.253118	-3.75085	-12.1281	5.42505	0.409959	0.682546	-0.0330553	-0.46785	0.403638	0.881633	0.965127
109	GM3(d18:1/22:0)	5.11614	-2.78287	13.657	0.210181	0.433813	-5.94283	-13.7703	2.5952	0.166616	0.377893	-2.37684	-12.2936	8.66117	0.65934	0.85624	-0.153896	-0.664557	0.359391	0.555474	0.824867
110	GM3(d18:1/24:0)	0.100125	-7.75792	8.62759	0.980828	0.987422	-6.46486	-14.595	2.43919	0.149412	0.353655	-5.90835	-15.8867	5.25378	0.286435	0.593391	-0.0378391	-0.572824	0.500024	0.889881	0.965127
111	GM3(d18:1/24:1)	3.97416	-4.74308	13.4892	0.382412	0.614081	-5.68697	-14.4394	3.96082	0.238198	0.471523	4.55366	-7.27594	17.8925	0.466674	0.740176	-0.0718372	-0.64454	0.504166	0.806108	0.945344
112	GM1(d18:1/16:0)	-0.609274	-5.162	4.162	0.798052	0.909709	-0.133602	-5.20838	5.21286	0.959863	0.982717	-4.03223	-10.0084	2.34076	0.209171	0.499747	-0.0583596	-0.365477	0.249705	0.709636	0.900424
113	Sulfatide (d18:1:/16:0(OH))	-0.138481	-7.95406	8.34071	0.97337	0.984822	-0.767686	-9.367	8.64753	0.867446	0.932223	-5.26364	-15.2804	5.9375	0.342346	0.635433	-0.397679	-0.929061	0.136553	0.144004	0.488854
114	Sulfatide (d18:1:/16:0)	-1.72817	-9.13895	6.28705	0.662506	0.821756	-1.1021	-9.36139	7.90981	0.802998	0.909986	-5.27128	-14.9275	5.481	0.322953	0.624913	0.00869704	-0.504671	0.524714	0.973536	0.999552
115	Sulfatide (d18:1:/24:0(OH))	-1.43582	-6.75781	4.18992	0.609042	0.788171	-0.928142	-6.85973	5.38119	0.76685	0.898642	-0.498813	-7.79122	7.37032	0.897376	0.968297	0.0936894	-0.270332	0.459039	0.613888	0.857671
116	Sulfatide (d18:1:/24:0)	-2.00579	-9.60509	6.23238	0.622206	0.798652	0.418699	-8.20422	9.85162	0.927206	0.971094	-9.29354	-18.7979	1.32324	0.0840202	0.332743	-0.192097	-0.719519	0.338126	0.476282	0.782417
117	Sulfatide (d18:1:/24:1(OH))	2.49033	-5.80818	11.52	0.567426	0.760275	0.6378	-8.38323	10.5471	0.894271	0.949473	5.34143	-6.1755	18.2721	0.377756	0.664508	-0.199397	-0.750982	0.355253	0.479651	0.782417
118	Sulfatide (d18:1:/24:1)	2.36326	-6.43586	11.9899	0.609967	0.788171	-3.51947	-12.6982	6.62434	0.48178	0.718492	-6.88808	-17.6849	5.32494	0.255886	0.553227	-0.384311	-0.970277	0.205122	0.200401	0.546163
119	SM(34:3)	2.28626	-3.80953	8.76834	0.470248	0.692092	-3.9115	-10.2591	2.88505	0.251994	0.48883	-0.925983	-8.93156	7.78334	0.828398	0.943041	-0.010482	-0.412943	0.393606	0.959306	0.997988
120	SM(35:2) (b)	4.4301	-7.83307	18.3249	0.4958	0.707982	0.29122	-12.7185	15.2401	0.967225	0.988946	-1.72623	-17.1968	16.6348	0.841818	0.945671	-0.025023	-0.841401	0.798076	0.952219	0.997988
121	SM(37:1)	3.76528	-3.97742	12.1323	0.34961	0.589539	-8.65733	-16.2057	-0.428946	0.0396572	0.142105	-0.00763343	-10.0947	11.2112	0.998876	0.999886	-0.129006	-0.636072	0.380647	0.618609	0.861158
122	SM(37:2)	3.18346	-4.65841	11.6703	0.436482	0.661129	-8.13753	-15.8688	0.304261	0.0584316	0.190827	0.628379	-9.70807	12.1481	0.909666	0.968297	-0.139762	-0.656518	0.379682	0.5967	0.852113
123	SM(38:3) (a)	2.09026	-5.00951	9.72068	0.573194	0.7636	-0.916439	-8.55009	7.35442	0.821639	0.916352	2.3772	-7.25773	13.0131	0.640789	0.851582	0.23367	-0.239441	0.709025	0.333012	0.672723
124	SM(38:3) (b)	5.11271	-2.74543	13.6058	0.208041	0.431698	-0.554398	-8.78795	8.42239	0.899507	0.952259	3.84204	-6.65299	15.517	0.487364	0.749863	0.0145911	-0.494204	0.525988	0.955214	0.997988
125	SM(40:3) (a)	3.64122	-3.99535	11.8852	0.35913	0.596174	-3.56963	-11.4391	4.9991	0.40204	0.64829	3.33804	-6.95783	14.7732	0.539151	0.781557	-0.0474372	-0.548327	0.455976	0.852907	0.961765
126	SM(40:3) (b)	1.11417	-5.80238	8.53858	0.758858	0.881171	-6.81189	-13.8741	0.829367	0.0792383	0.235886	0.481637	-8.82185	10.7344	0.92266	0.968297	-0.210241	-0.673269	0.254947	0.374495	0.714046
127	SM(41:0)	0.198113	-6.62662	7.52167	0.956075	0.973687	-10.3208	-17.0882	-3.00095	0.00658825	0.0451319	-6.70636	-15.3081	2.76897	0.159232	0.444436	0.240349	-0.222725	0.705573	0.308981	0.66156
128	SM(41:1) (a)	6.76705	-1.69494	15.9574	0.119911	0.310052	-16.6718	-23.9841	-8.65624	0.000107229	0.00207488	-1.95258	-12.4489	9.80211	0.732446	0.889043	-0.0536132	-0.59386	0.489569	0.845988	0.958704
129	SM(43:1)	3.79021	-3.55448	11.6942	0.319897	0.561458	-13.8847	-20.6352	-6.56	0.000349726	0.00510732	-1.61647	-11.0358	8.80022	0.750572	0.89829	0.00209758	-0.478497	0.485013	0.99318	0.999552
130	SM(43:2) (b)	0.449425	-5.97219	7.3096	0.893994	0.949179	-8.52774	-15.0081	-1.55326	0.0175158	0.0808918	0.392021	-8.30265	9.91112	0.932429	0.9717	-0.0908729	-0.523174	0.343306	0.680659	0.888832
131	SM(43:2) (c)	0.908764	-6.38039	8.76544	0.81276	0.91702	-15.1345	-21.9246	-7.75373	0.000123572	0.00227725	-0.873683	-10.5586	9.85994	0.86693	0.958576	-0.000882687	-0.491807	0.492463	0.997191	0.999552
132	SM(44:1)	7.23696	0.341363	14.6064	0.0393884	0.142461	3.66197	-3.72474	11.6154	0.339708	0.588219	0.377682	-8.36592	9.95559	0.935281	0.9717	0.0683797	-0.367221	0.505884	0.75839	0.92643
133	SM(44:2)	5.44853	-0.975447	12.2892	0.097908	0.271616	2.86388	-4.08184	10.3125	0.427958	0.677381	1.08147	-7.26581	10.1801	0.806455	0.937232	0.0152063	-0.396578	0.428693	0.942322	0.993995
134	SM(44:3)	4.76998	-1.36969	11.2918	0.130191	0.319107	3.16013	-3.54133	10.3272	0.363337	0.619857	-0.298448	-8.22189	8.30904	0.943509	0.973201	-0.0690289	-0.464354	0.327866	0.732365	0.912802
135	SM(d16:1/19:0)	1.482	-5.18189	8.61423	0.670707	0.823062	-8.61724	-15.2665	-1.44621	0.0194756	0.0856486	-2.72571	-11.3764	6.76933	0.560276	0.801578	-0.0898386	-0.53427	0.356579	0.692287	0.895585
136	SM(d16:1/23:0)/SM(d17:1/22:0)	2.44041	-4.37728	9.74419	0.491988	0.703879	-8.95878	-15.6723	-1.71076	0.0164169	0.0794169	0.0390978	-8.97605	9.94712	0.993516	0.997601	-0.119864	-0.570361	0.332674	0.602513	0.857671
137	SM(d16:1/24:1)	3.44586	-4.22138	11.7269	0.387931	0.616987	-4.36066	-12.2115	4.19227	0.307041	0.553921	4.54174	-5.93475	16.185	0.409085	0.682546	0.0766965	-0.42789	0.58384	0.765894	0.929029
138	SM(d17:1/14:0)	1.88354	-4.31292	8.48126	0.559397	0.755625	-5.3961	-11.7735	1.44224	0.119052	0.303114	1.61185	-6.7654	10.7418	0.715249	0.886239	-0.0798914	-0.490578	0.332491	0.70325	0.899695
139	SM(d17:1/16:0)	2.6756	-3.62038	9.38286	0.412829	0.641625	-4.05951	-10.58	2.93642	0.247981	0.48469	0.0354346	-8.27888	9.10342	0.993605	0.997601	-0.109158	-0.523203	0.30661	0.605747	0.857671
140	SM(d17:1/24:1)	1.21046	-5.34321	8.21788	0.724223	0.863803	-11.8478	-18.1731	-5.03344	0.000935119	0.0114886	2.60207	-6.39713	12.4665	0.582806	0.812778	-0.0837313	-0.521814	0.356281	0.70824	0.900424
141	SM(d18:0/14:0)	4.27983	-2.58683	11.6305	0.227406	0.459563	0.910595	-6.45227	8.85297	0.814302	0.910795	0.439495	-8.51716	10.2731	0.926563	0.969134	0.275887	-0.171453	0.725231	0.226681	0.581416
142	SM(d18:0/16:0)	3.3877	-1.96344	9.03093	0.218742	0.445542	3.11557	-2.8031	9.39465	0.30845	0.553921	-2.88248	-9.70822	4.45925	0.430867	0.706549	0.201193	-0.14774	0.551344	0.258264	0.616425
143	SM(d18:0/22:0)	1.57663	-4.1113	7.60196	0.594123	0.783392	-0.534578	-6.70973	6.04933	0.869593	0.932223	-6.2259	-13.3506	1.48458	0.110642	0.367683	0.0993247	-0.27858	0.478662	0.606411	0.857671
144	SM(d18:1/14:0/SM(d16:1/16:0)	2.83486	-3.28639	9.34354	0.371362	0.603854	-4.20157	-10.5225	2.56593	0.217311	0.447337	1.74075	-6.47072	10.6732	0.687265	0.871516	0.0284701	-0.373659	0.432223	0.889665	0.965127
145	SM(d18:1/16:0)	3.16074	-3.90914	10.7508	0.389664	0.618033	0.455745	-7.17153	8.70972	0.909993	0.958278	0.139164	-9.14992	10.378	0.977627	0.987837	0.03593	-0.429149	0.503181	0.879708	0.965127
146	SM(d18:1/17:0)/SM(d17:1/18:0)	3.59923	-2.85472	10.482	0.280733	0.524848	-2.68843	-9.40719	4.52863	0.45468	0.699452	1.79607	-6.79791	11.1825	0.691963	0.873703	-0.287397	-0.707499	0.134481	0.181139	0.515824
147	SM(d18:1/18:0/SM(d16:1/20:0)	5.33554	-2.78809	14.138	0.203864	0.427239	5.48187	-3.52616	15.331	0.240793	0.474234	-3.35356	-13.4254	7.88997	0.542929	0.784006	-0.0854679	-0.610433	0.44227	0.750009	0.924374
148	SM(d18:1/20:0)/SM(d16:1/22:0)	3.17188	-3.71444	10.5507	0.375004	0.605956	-0.640813	-7.98893	7.29413	0.869526	0.932223	-0.275885	-9.28841	9.63207	0.95434	0.973201	-0.0216964	-0.473989	0.432652	0.925149	0.986356
149	SM(d18:1/22:0)/SM(d16:1/24:0)	2.99219	-2.92696	9.27227	0.328331	0.565976	-0.665827	-6.99478	6.09381	0.842098	0.925823	-0.682968	-8.42539	7.71406	0.868345	0.958772	-0.060806	-0.448328	0.328224	0.758587	0.92643
150	SM(d18:1/23:0)/SM(d17:1/24:0)	1.41652	-5.14048	8.42676	0.679529	0.826008	-7.67131	-14.2863	-0.545818	0.0354016	0.133663	-0.206383	-8.94607	9.37217	0.964703	0.978611	0.0424011	-0.395545	0.482272	0.849551	0.95993
151	SM(d18:1/24:0)	3.2385	-2.92402	9.79222	0.309557	0.553342	-1.78706	-8.28547	5.17179	0.605116	0.804741	-2.40048	-10.2996	6.1942	0.571996	0.808962	-0.0379505	-0.440974	0.366704	0.85366	0.961765
152	SM(d18:1/24:1)	2.27686	-4.6918	9.75505	0.531178	0.731551	1.29277	-6.35363	9.56351	0.748013	0.891371	3.15518	-6.3589	13.6359	0.528612	0.775875	0.10827	-0.354354	0.573042	0.646525	0.871795
153	SM(d18:2/14:0)	2.14706	-4.15269	8.86088	0.512455	0.721164	-2.12628	-8.81642	5.05472	0.551293	0.769368	1.61543	-6.87841	10.884	0.718553	0.886702	0.0475534	-0.36961	0.466463	0.823249	0.957607
154	SM(d18:2/16:0)	1.50276	-5.30326	8.79794	0.673125	0.823062	0.954936	-6.54534	9.05715	0.809024	0.910795	-2.92432	-11.7373	6.76859	0.540465	0.781907	-0.00444751	-0.458965	0.452145	0.984709	0.999552
155	SM(d18:2/17:0)	3.5022	-3.85684	11.4245	0.359707	0.596174	-3.04623	-10.6823	5.24262	0.459203	0.70086	0.000733022	-9.61825	10.6434	0.999886	0.999886	-0.122899	-0.605249	0.361793	0.61804	0.861158
156	SM(d18:2/18:0)	3.8376	-3.61594	11.8675	0.321154	0.561458	2.74412	-5.42507	11.619	0.521285	0.756988	-0.61404	-10.2641	10.0738	0.905763	0.968297	-0.015134	-0.502791	0.474913	0.951541	0.997988
157	SM(d18:2/18:1)	3.62904	-3.95138	11.8077	0.357086	0.595657	-1.69984	-9.66408	6.96655	0.690385	0.859099	2.482	-7.65574	13.7327	0.64406	0.851582	0.167167	-0.331034	0.667858	0.51085	0.792422
158	SM(d18:2/20:0)	2.77373	-4.69925	10.8327	0.476878	0.696231	1.68558	-6.50398	10.5925	0.695956	0.859099	-0.792469	-10.5485	10.0276	0.880066	0.963467	-0.0889923	-0.582845	0.407314	0.724304	0.910083
159	SM(d18:2/22:0)	0.976925	-6.79225	9.39369	0.811584	0.91702	-1.07823	-9.50626	8.13473	0.811111	0.910795	-1.38611	-11.6391	10.0566	0.8029	0.934503	-0.175022	-0.698236	0.350949	0.512924	0.792422
160	SM(d18:2/23:0)	1.78801	-5.61828	9.77548	0.645158	0.814927	-8.98687	-16.3218	-1.00898	0.0281209	0.112775	-0.322195	-10.131	10.5572	0.951233	0.973201	-0.00361826	-0.498239	0.493461	0.988571	0.999552
161	SM(d18:2/24:0)	1.6932	-4.879	8.71949	0.62179	0.798652	-2.28054	-9.2789	5.25768	0.542283	0.767434	-1.59343	-10.2082	7.84781	0.730706	0.889043	-0.230756	-0.667322	0.207728	0.301258	0.656394
162	SM(d19:1/24:1)	3.99363	-3.87465	12.506	0.328704	0.565976	-5.28966	-13.2254	3.37177	0.223052	0.456727	3.50787	-7.07775	15.2994	0.530475	0.775875	-0.0114222	-0.526454	0.506276	0.965364	0.998919
163	PA(34:1)	14.6868	-0.227929	31.831	0.0538597	0.179323	17.0652	0.260825	36.686	0.0462832	0.160309	17.7669	-2.71244	42.5572	0.0932368	0.342015	0.878518	-0.0397629	1.80523	0.0607951	0.32452
164	PA(36:1)	13.0106	-0.615456	28.5049	0.0620308	0.198357	19.0453	3.19239	37.3336	0.016892	0.079819	8.77466	-8.79642	29.7309	0.348839	0.641333	0.697672	-0.148	1.5505	0.105964	0.41323
165	PA(36:2)	10.9168	-2.97354	26.7958	0.128823	0.319107	19.638	3.09526	38.8351	0.0182897	0.0827849	20.2043	0.0554825	44.4106	0.0493136	0.25693	0.948669	0.0659948	1.83913	0.0351468	0.239467
166	PA(36:3)	12.2808	-3.99386	31.3144	0.14681	0.350713	24.2619	4.39916	47.9037	0.0145973	0.0745483	28.3682	3.56284	59.1149	0.0227144	0.181774	0.933723	-0.0984016	1.97651	0.0762686	0.345409
167	PA(36:4)	13.9694	-0.94833	31.1337	0.0676649	0.210691	27.2744	8.88683	48.7671	0.00250647	0.0228236	25.0599	3.17478	51.5873	0.0227804	0.181774	0.653149	-0.269441	1.58427	0.165496	0.506299
168	PA(40:6)	14.1463	3.54102	25.8379	0.00791347	0.0474808	9.47049	-1.78147	22.0115	0.101851	0.276605	13.0891	-1.06516	29.2683	0.0713177	0.31273	0.349831	-0.290421	0.994194	0.284355	0.641663
169	PC(14:0_16:0)	1.38919	-6.88604	10.3999	0.750413	0.879729	7.53169	-2.18428	18.2127	0.132608	0.324806	-0.649316	-11.5971	11.6542	0.912775	0.968297	0.168009	-0.390231	0.729377	0.555459	0.824867
170	PC(14:0_20:4)	2.0606	-4.69239	9.29207	0.558658	0.755625	-0.934959	-8.19795	6.90265	0.808634	0.910795	4.10181	-5.22571	14.3473	0.400655	0.681554	0.0748578	-0.373812	0.525548	0.743732	0.919566
171	PC(14:0_22:6)	3.66011	-3.44133	11.2838	0.320222	0.561458	-5.01388	-12.2232	2.78753	0.201082	0.424962	5.6858	-4.11417	16.4874	0.264835	0.56625	0.0584386	-0.406564	0.525613	0.805519	0.945344
172	PC(15-MHDA_18:1)	6.11905	-2.26035	15.2168	0.15669	0.363109	-14.6723	-22.1323	-6.49756	0.000703586	0.00938924	1.37353	-9.43918	13.4773	0.812318	0.938306	0.0960731	-0.442894	0.637958	0.726977	0.911961
173	PC(15-MHDA_18:2)	5.13596	-4.57601	15.8364	0.310585	0.553632	-8.99945	-18.2995	1.35918	0.0863128	0.245611	12.1855	-1.77633	28.1319	0.0898193	0.335846	0.250289	-0.385476	0.890112	0.4406	0.754479
174	PC(15-MHDA_20:4)	4.41723	-2.87421	12.256	0.241368	0.477798	-13.9461	-20.6031	-6.73102	0.000270948	0.00419428	1.13877	-8.4182	11.6931	0.822799	0.943041	-0.146485	-0.619806	0.32909	0.544786	0.821958
175	PC(15-MHDA_22:6)	7.1887	-1.80219	17.0028	0.120175	0.310052	-18.2617	-25.8506	-9.89599	5.47153e-05	0.00114459	0.685616	-10.7115	13.5375	0.911092	0.968297	-0.166335	-0.73877	0.409402	0.569859	0.834298
176	PC(15:0_20:3)	2.10485	-4.27103	8.90538	0.526019	0.728334	-7.99184	-14.3594	-1.15086	0.0229052	0.0948056	6.54429	-2.47154	16.3936	0.159629	0.444436	0.0868664	-0.335838	0.511364	0.687148	0.893869
177	PC(15:0_20:4)	2.98353	-4.16859	10.6694	0.422774	0.647975	-9.21988	-16.2043	-1.65328	0.0179658	0.0822811	3.94072	-5.82821	14.723	0.442144	0.717442	0.0105719	-0.460821	0.484197	0.964963	0.998919
178	PC(15:0_22:6)	6.00108	-2.12635	14.8034	0.151862	0.356988	-11.2334	-18.7701	-2.99746	0.00856906	0.0552704	5.09152	-5.79765	17.2394	0.372941	0.662055	0.156073	-0.366984	0.681877	0.558801	0.824867
179	PC(16:0_16:0)	0.245978	-8.01323	9.24676	0.955267	0.973687	7.32967	-2.4592	18.1009	0.146853	0.348662	4.39957	-7.21145	17.4635	0.473527	0.746457	0.125199	-0.43829	0.691878	0.663419	0.883756
180	PC(16:0_18:0)	1.73493	-4.6809	8.5826	0.604234	0.786054	2.03894	-5.09262	9.70638	0.584488	0.791618	-1.51253	-9.9283	7.68955	0.737661	0.889043	0.080237	-0.346765	0.509069	0.712699	0.902829
181	PC(16:0_18:1)	3.79655	-1.98436	9.91842	0.202078	0.426182	1.35518	-4.90349	8.02576	0.67846	0.852981	5.6153	-2.36623	14.2493	0.172622	0.460723	0.179491	-0.196622	0.557022	0.349475	0.69005
182	PC(16:0_18:2)	4.00788	-1.86728	10.2348	0.184916	0.408969	1.87664	-4.50352	8.68305	0.572549	0.785732	5.11139	-2.94395	13.8353	0.219958	0.510533	0.353456	-0.028824	0.737198	0.069932	0.345409
183	PC(16:0_18:3) (a)	10.3267	1.15922	20.325	0.0264638	0.11132	-2.27465	-11.2634	7.62467	0.639711	0.826605	15.1691	2.25255	29.7172	0.0200488	0.17242	0.711902	0.140061	1.28701	0.0147063	0.151769
184	PC(16:0_18:3) (b)	-1.62042	-9.46533	6.90425	0.699555	0.844704	5.44061	-3.86833	15.651	0.260747	0.49955	4.14682	-7.06957	16.717	0.484012	0.749863	-0.0765196	-0.620077	0.470011	0.782932	0.936614
185	PC(16:0_20:3) (a)	4.00659	-2.54036	10.9933	0.235826	0.470437	-1.05734	-7.95975	6.36269	0.772916	0.901194	4.73246	-4.20057	14.4985	0.308796	0.615292	0.163273	-0.263267	0.591638	0.453072	0.764447
186	PC(16:0_20:3) (b)	2.16874	-7.24545	12.5384	0.663063	0.821756	3.32428	-7.20882	15.053	0.550505	0.769368	3.85943	-9.03434	18.5808	0.574963	0.808962	-0.0813952	-0.713392	0.554625	0.801097	0.945344
187	PC(16:0_20:4)	0.964373	-2.27149	4.30738	0.563038	0.757311	-2.16465	-5.64589	1.44503	0.235985	0.469006	0.724946	-3.67516	5.32605	0.750896	0.89829	-0.0302194	-0.24374	0.183758	0.781397	0.936614
188	PC(16:0_20:5)	6.83403	-2.90281	17.5473	0.174795	0.392847	-4.80873	-14.4076	5.86665	0.362877	0.619857	7.48945	-5.71225	22.5396	0.279497	0.583786	-0.0722588	-0.697112	0.556527	0.821025	0.957607
189	PC(16:0_22:6)	4.44659	-1.17335	10.3861	0.122912	0.313045	-6.07977	-11.6834	-0.120622	0.0456854	0.160002	-0.480668	-7.74924	7.3606	0.900744	0.968297	0.0445409	-0.318	0.4084	0.809709	0.948131
190	PC(16:1_18:2)	4.42671	-3.70528	13.2454	0.294456	0.541575	4.05654	-4.91594	13.8757	0.386799	0.643351	9.95823	-1.61077	22.8876	0.0940508	0.34327	0.602505	0.0685761	1.13928	0.0270037	0.208701
191	PC(16:1_20:4)	2.03791	-4.59764	9.13499	0.555915	0.754874	-0.341571	-7.52308	7.39763	0.928436	0.971094	5.94339	-3.38817	16.1763	0.219267	0.510533	-0.0356431	-0.475874	0.406535	0.87401	0.965127
192	PC(16:1_22:6)	4.74742	-2.05036	12.017	0.175106	0.392847	-3.74727	-10.6692	3.711	0.315265	0.559668	6.36963	-2.9805	16.6209	0.187979	0.480688	0.0380114	-0.401612	0.479575	0.865482	0.965127
193	PC(17:0_18:1)	4.60064	-2.30322	11.9924	0.196253	0.416163	-9.37634	-16.004	-2.22573	0.0111476	0.0647977	2.57887	-6.58964	12.6473	0.593478	0.821738	-0.0168194	-0.463928	0.432298	0.941266	0.993995
194	PC(17:0_18:2)	6.47643	-2.49867	16.2777	0.162151	0.371317	-5.47802	-14.2969	4.24827	0.259056	0.49878	12.9205	0.0765736	27.4128	0.0485699	0.255736	0.0528042	-0.52383	0.632781	0.857702	0.964915
195	PC(17:0_20:4)	2.00756	-4.38341	8.82569	0.546499	0.746014	-11.2579	-17.4197	-4.63625	0.00118019	0.0132387	-1.52298	-9.8835	7.61319	0.734176	0.889043	-0.218559	-0.641417	0.206098	0.312021	0.661655
196	PC(17:0_22:6)	7.35627	-0.664949	16.0252	0.0731243	0.218238	-14.9566	-21.9937	-7.28467	0.00025089	0.00402701	0.558933	-9.59849	11.8576	0.918153	0.968297	-0.102016	-0.609913	0.408477	0.694252	0.895585
197	PC(17:1_18:2)	4.40883	-3.19945	12.6151	0.263204	0.506765	-5.33324	-12.9739	2.97829	0.201372	0.424962	5.79444	-4.63156	17.3602	0.286729	0.593391	0.324151	-0.172856	0.823631	0.20111	0.546171
198	PC(18:0_18:1)	4.31488	-1.89833	10.9216	0.177201	0.394749	-1.73345	-8.2213	5.21303	0.615287	0.810953	0.690541	-7.44117	9.53666	0.872539	0.959297	-0.0463854	-0.448472	0.357325	0.821231	0.957607
199	PC(18:0_18:2)	3.52105	-2.74893	10.1953	0.277134	0.520183	1.4	-5.4073	8.69718	0.694518	0.859099	4.13463	-4.41548	13.4496	0.353393	0.645733	0.334781	-0.0758523	0.747102	0.110001	0.414792
200	PC(18:0_20:3)	4.30305	-1.54182	10.4949	0.151869	0.356988	-3.49788	-9.49343	2.89485	0.276067	0.516126	-0.464408	-8.03229	7.72622	0.908	0.968297	0.0976236	-0.280559	0.47724	0.612853	0.857671
201	PC(18:0_20:4)	2.36749	-3.00683	8.0396	0.394472	0.622517	-4.75533	-10.3004	1.13251	0.111189	0.292721	-3.01026	-9.9238	4.43389	0.41725	0.690068	-0.0960906	-0.449105	0.258175	0.593957	0.852113
202	PC(18:0_22:4)	2.89563	-3.38333	9.58266	0.373619	0.605956	-6.28504	-12.6236	0.513297	0.0692027	0.214251	-0.947338	-9.14063	7.98478	0.828654	0.943041	-0.113482	-0.525447	0.30019	0.589684	0.849935
203	PC(18:0_22:5) (n3)	7.13258	-1.4121	16.4178	0.104068	0.284625	-13.793	-21.4055	-5.44318	0.00169823	0.0174517	4.12432	-7.09198	16.6947	0.486435	0.749863	-0.134562	-0.677923	0.411771	0.628047	0.864961
204	PC(18:0_22:5) (n6)	3.79872	-5.03608	13.4555	0.410754	0.641226	-0.401953	-9.78463	9.95655	0.936306	0.971449	1.13596	-10.478	14.2566	0.855748	0.95577	0.00834674	-0.573899	0.594002	0.977613	0.999552
205	PC(18:0_22:6)	5.46727	-1.7528	13.2179	0.140949	0.339858	-9.49505	-16.3593	-2.06743	0.0132616	0.0698263	-2.77507	-11.7841	7.15402	0.569967	0.807976	-0.051303	-0.515452	0.415011	0.828654	0.957607
206	PC(18:1_18:1)	5.76472	-1.05509	13.0546	0.0991779	0.274156	1.32326	-5.91678	9.12044	0.727772	0.881113	4.74821	-4.40113	14.7732	0.319256	0.623747	0.293277	-0.144553	0.733028	0.189149	0.524735
207	PC(18:1_18:2)	1.11047	-7.19696	10.1615	0.800369	0.911008	-0.65987	-9.69516	9.27943	0.891586	0.948559	5.57529	-6.13458	18.746	0.365109	0.653167	0.405844	-0.1576	0.972468	0.158025	0.505159
208	PC(18:1_20:3)	2.82976	-4.0367	10.1875	0.428086	0.654819	-1.46862	-8.75866	6.40388	0.705547	0.864072	6.32794	-3.28552	16.897	0.204003	0.498194	0.200311	-0.253189	0.655873	0.386622	0.717746
209	PC(18:1_22:6) (a)	3.0513	-2.63529	9.07001	0.298783	0.54542	-5.44352	-11.2288	0.718806	0.0821714	0.240647	4.27079	-3.53739	12.711	0.29174	0.597504	-0.0497885	-0.421494	0.323305	0.793016	0.945344
210	PC(18:1_22:6) (b)	7.33001	0.0192899	15.1751	0.0493789	0.170622	-8.94985	-15.821	-1.51788	0.0192636	0.0854702	3.94124	-5.64245	14.4983	0.432871	0.706841	0.0716139	-0.390695	0.536069	0.76151	0.927416
211	PC(18:2_18:2)	4.45907	-3.32472	12.8696	0.268989	0.512801	-0.310558	-8.53749	8.65637	0.943481	0.974972	9.07276	-1.91547	21.292	0.108748	0.365973	0.172764	-0.335111	0.683227	0.505049	0.792422
212	PC(18:2_20:5)	3.44272	-4.59915	12.1625	0.411743	0.641226	-2.74675	-11.1186	6.41367	0.543631	0.767434	8.03456	-3.31329	20.7143	0.17193	0.460723	-0.329694	-0.857755	0.201179	0.222592	0.578141
213	PC(20:0_20:4)	0.189291	-5.34771	6.05019	0.947932	0.973426	-5.31679	-11.1186	0.863676	0.0902442	0.253118	-3.06818	-10.3376	4.79064	0.432716	0.706841	-0.205341	-0.577044	0.167751	0.279762	0.64117
214	PC(28:0)	-0.902751	-8.00925	6.75274	0.810921	0.91702	1.51733	-6.54665	10.2771	0.72096	0.877092	-0.831606	-10.4515	9.82172	0.872358	0.959297	0.190951	-0.297229	0.68152	0.443344	0.755833
215	PC(31:0) (a)	1.39557	-7.05842	10.6185	0.75465	0.879729	-10.7568	-18.9931	-1.68305	0.0213296	0.0902136	-3.5688	-14.42	8.65825	0.550155	0.789023	-0.028431	-0.598077	0.54448	0.92218	0.986356
216	PC(31:0) (b)	0.923639	-7.22716	9.79055	0.830287	0.924706	1.2506	-7.80231	11.1924	0.794486	0.908211	4.50195	-6.8945	17.2934	0.454171	0.728441	-0.0398102	-0.59081	0.514243	0.887538	0.965127
217	PC(32:1)	0.780499	-7.20333	9.45122	0.853286	0.93283	5.33446	-3.90461	15.4618	0.266641	0.506851	8.31308	-3.27694	21.2919	0.166332	0.451723	0.10526	-0.435586	0.649044	0.703041	0.899695
218	PC(32:2)	1.1461	-6.91503	9.90532	0.787652	0.904514	2.37522	-6.6582	12.2829	0.617905	0.811596	6.8221	-4.67626	19.7074	0.255541	0.553227	0.364173	-0.181473	0.912802	0.190835	0.525646
219	PC(33:0) (a)	3.23765	-5.83742	13.1873	0.496685	0.707982	-17.6699	-25.6787	-8.79802	0.000208906	0.00359319	-2.39731	-13.9665	10.7277	0.705773	0.882501	0.0647259	-0.537789	0.67089	0.833414	0.957607
220	PC(33:0) (b)	3.32452	-4.53047	11.8258	0.41691	0.64617	-5.2536	-13.2301	3.45611	0.228608	0.463201	2.05558	-8.43062	13.7426	0.712568	0.886239	-0.0886803	-0.605865	0.431195	0.737185	0.915861
221	PC(33:1)	4.75211	-3.55412	13.7737	0.270174	0.513744	-4.80236	-13.1601	4.35975	0.293274	0.540552	5.89132	-5.45001	18.5931	0.321401	0.623747	0.135793	-0.405744	0.680275	0.623267	0.861445
222	PC(33:2)	4.36537	-3.88021	13.3183	0.308327	0.553342	-4.85541	-13.1784	4.2654	0.286024	0.531689	8.52452	-3.05737	21.4901	0.155081	0.440437	0.390927	-0.149945	0.934729	0.156585	0.505159
223	PC(34:5)	5.52132	-2.94317	14.724	0.207331	0.431382	-0.860387	-9.6649	8.80225	0.855269	0.925823	5.56771	-5.86834	18.3931	0.353735	0.645733	0.188868	-0.359508	0.740261	0.499806	0.792422
224	PC(35:5)	6.33931	-4.45782	18.3566	0.259995	0.50309	-11.7809	-21.6852	-0.624117	0.0391466	0.140928	12.4962	-2.86471	30.2863	0.115752	0.37175	-0.0626999	-0.762571	0.642107	0.860921	0.965127
225	PC(36:6) (a)	5.25144	-4.40005	15.8773	0.296386	0.543608	-4.14378	-13.8687	6.67921	0.437486	0.686844	9.47607	-4.05066	24.9098	0.178102	0.467291	-0.163236	-0.79153	0.469038	0.611475	0.857671
226	PC(38:2)	3.35477	-2.36921	9.41434	0.255805	0.496223	-0.810128	-6.9008	5.67901	0.801051	0.90911	1.81418	-5.83735	10.0875	0.65145	0.854615	0.0393295	-0.334091	0.414149	0.836466	0.957607
227	PC(38:4) (b)	2.62711	-2.94096	8.5146	0.361608	0.596768	-5.7797	-11.4479	0.251337	0.0599841	0.192646	2.00945	-5.50244	10.1185	0.609659	0.831225	0.00010462	-0.365375	0.366925	0.999552	0.999552
228	PC(38:5) (a)	3.56813	-1.57798	8.98331	0.177195	0.394749	-8.68251	-13.715	-3.35653	0.00173358	0.0174517	3.07483	-3.88265	10.5359	0.395056	0.674997	-0.0234976	-0.357387	0.311511	0.890311	0.965127
229	PC(38:5) (b)	4.96823	-1.10428	11.4136	0.110572	0.297161	-1.23331	-7.56747	5.53491	0.713216	0.870709	4.16777	-4.00576	13.0372	0.326794	0.627578	-0.0408693	-0.431097	0.350888	0.837447	0.957607
230	PC(38:6) (a)	2.64842	-3.9924	9.74859	0.443039	0.665517	-3.56782	-10.4811	3.87939	0.33787	0.586348	3.10679	-5.92867	13.0101	0.512601	0.770395	-0.035933	-0.47382	0.40388	0.872319	0.965127
231	PC(38:7)(c)	5.72841	-0.822342	12.7118	0.08771	0.246864	-5.88785	-12.3505	1.05128	0.0944087	0.261908	0.440779	-7.99319	9.64787	0.921579	0.968297	0.0224623	-0.396581	0.443269	0.916357	0.985084
232	PC(39:5)(a)	9.50992	0.885152	18.872	0.0300282	0.120424	-15.6057	-22.9651	-7.54329	0.000283162	0.00427743	-0.270552	-10.8808	11.6029	0.962288	0.97803	-0.14588	-0.682098	0.393233	0.594588	0.852113
233	PC(39:5)(b)	2.44406	-4.17022	9.51488	0.477647	0.696231	-16.1534	-22.1524	-9.69209	3.89476e-06	0.000137025	0.992817	-7.83983	10.672	0.832178	0.943041	-0.184693	-0.621022	0.253551	0.407577	0.733639
234	PC(40:10)	13.8216	-3.71286	34.5491	0.12909	0.319107	2.62844	-14.797	23.6176	0.784302	0.904695	7.81814	-14.2839	35.6192	0.519529	0.773678	0.966769	-0.135897	2.08161	0.0858157	0.371069
235	PC(40:7) (a)	0.600546	-6.57228	8.32406	0.873741	0.939272	1.76726	-6.27029	10.4941	0.675959	0.852981	-1.39567	-10.9066	9.1306	0.785603	0.922315	-0.237404	-0.720603	0.248147	0.336712	0.676922
236	PC(40:8)	0.313374	-6.31039	7.40544	0.928353	0.96763	-2.08195	-9.24618	5.64784	0.586757	0.791618	-3.02512	-11.6965	6.49774	0.519784	0.773678	-0.303732	-0.749758	0.144298	0.18324	0.515824
237	PC(44:12)	0.0624865	-7.42243	8.15256	0.987415	0.988693	-7.37534	-15.0486	0.990988	0.0823743	0.240647	-4.3763	-14.0462	6.38152	0.410057	0.682546	-0.544144	-1.0504	-0.0352977	0.0361653	0.242106
238	PC(O-16:0/16:0)	-1.12915	-8.82368	7.21474	0.7832	0.900739	3.49411	-5.42432	13.2535	0.454443	0.699452	-0.120456	-10.6226	11.6157	0.983008	0.991979	-0.178678	-0.708118	0.353584	0.509208	0.792422
239	PC(O-16:0/20:3)	-1.13908	-7.15305	5.26444	0.720099	0.863302	-2.49245	-9.06703	4.55747	0.477903	0.715468	1.70164	-6.68488	10.8419	0.700328	0.879161	-0.161905	-0.57235	0.250235	0.440126	0.754479
240	PC(O-16:0/20:4)	-0.287817	-7.40018	7.37082	0.939049	0.971557	-0.581154	-8.43639	7.94799	0.889436	0.948452	-1.52892	-11.0308	8.98775	0.765649	0.906153	-0.2404	-0.723786	0.245341	0.330851	0.672723
241	PC(O-16:0/22:6)	0.507679	-5.8796	7.32842	0.879655	0.943009	-3.42268	-10.2244	3.8943	0.349355	0.600891	-0.55218	-9.11469	8.81703	0.903902	0.968297	-0.310282	-0.738998	0.120286	0.157252	0.505159
242	PC(O-18:0/18:1)	1.20203	-5.10585	7.92921	0.71551	0.861283	1.4692	-5.54024	8.99877	0.689172	0.859099	-0.896203	-9.26718	8.24707	0.841274	0.945671	-0.128298	-0.549294	0.294481	0.550817	0.824627
243	PC(O-18:0/18:2)	2.09268	-6.58705	11.5789	0.647263	0.814927	-0.415427	-9.78625	9.92877	0.934093	0.971449	5.26461	-6.80994	18.9036	0.408531	0.682546	-0.130849	-0.711596	0.453296	0.659422	0.879988
244	PC(O-18:0/20:4)	-0.958425	-7.04919	5.53145	0.765803	0.887323	-3.12368	-9.72678	3.96241	0.37765	0.641011	-5.45611	-13.3365	3.14088	0.205971	0.498194	-0.165887	-0.580934	0.250893	0.434121	0.752333
245	PC(O-18:0/22:6)	-0.0598454	-5.76643	5.99232	0.984053	0.987422	-3.33903	-9.45795	3.19341	0.308181	0.553921	-3.36678	-10.8518	4.74667	0.404455	0.682546	-0.264925	-0.649083	0.120718	0.177527	0.515824
246	PC(O-18:1/18:1)	0.542758	-8.51381	10.4959	0.910369	0.95998	2.61774	-7.60997	13.9777	0.629004	0.818234	2.85697	-9.63102	17.0707	0.66923	0.862075	0.190265	-0.42859	0.812966	0.547052	0.822171
247	PC(O-18:1/18:2)	-0.761154	-6.82816	5.70091	0.812059	0.91702	-1.16001	-7.85747	6.02426	0.744089	0.891371	2.75991	-5.75554	12.0448	0.536728	0.781557	-0.0983966	-0.511208	0.316127	0.640717	0.87082
248	PC(O-32:1)	-3.19795	-9.72548	3.80157	0.360902	0.596768	-2.32725	-9.62455	5.55927	0.551678	0.769368	-4.88456	-13.5677	4.67095	0.304645	0.612455	-0.0893338	-0.546119	0.369549	0.701819	0.899695
249	PC(O-32:2)	-0.877359	-7.70535	6.45577	0.80848	0.91702	-2.43682	-9.88231	5.62382	0.541864	0.767434	-0.593289	-9.86109	9.6274	0.904987	0.968297	-0.00638331	-0.473731	0.463159	0.978659	0.999552
250	PC(O-34:1)	-0.751447	-8.08459	7.16675	0.847028	0.930567	5.21753	-3.39268	14.5951	0.242477	0.476338	2.84443	-7.43021	14.2595	0.600928	0.829087	-0.1546	-0.656388	0.349723	0.546664	0.822171
251	PC(O-34:2)	-1.72479	-8.13319	5.13064	0.612526	0.790159	0.330892	-6.91883	8.14527	0.931095	0.971449	0.703542	-8.19052	10.4592	0.881674	0.963864	-0.227977	-0.668606	0.214606	0.311593	0.661655
252	PC(O-34:4)	-3.98717	-11.6104	4.29352	0.334456	0.572674	-15.8354	-23.2341	-7.72359	0.00025494	0.00402701	-5.34615	-15.497	6.02402	0.341865	0.635433	-0.014862	-0.55632	0.529544	0.957146	0.997988
253	PC(O-35:4)	-1.45408	-7.65991	5.16884	0.658449	0.821756	-6.90651	-13.4036	0.078052	0.0525142	0.177493	-0.380318	-8.88082	8.91319	0.93316	0.9717	-0.318635	-0.743309	0.107856	0.142607	0.488854
254	PC(O-36:0)	-3.15161	-9.85367	4.04873	0.380828	0.614081	-0.971947	-8.56391	7.25037	0.810031	0.910795	-10.179	-18.5911	-0.897517	0.0324364	0.214579	0.141924	-0.328347	0.614414	0.554247	0.824867
255	PC(O-36:5)	-0.544106	-7.498	6.93255	0.882526	0.944652	-6.51058	-13.752	1.33878	0.101534	0.276605	2.85864	-6.87313	13.6074	0.577777	0.808962	-0.160561	-0.634443	0.315581	0.507377	0.792422
256	PC(O-38:5)	-0.645	-6.50054	5.57726	0.834348	0.924706	-4.29839	-10.5507	2.39089	0.202048	0.424962	0.264323	-7.74876	8.97343	0.95039	0.973201	-0.0944433	-0.491986	0.304688	0.641792	0.87082
257	PC(O-40:5)	-0.552183	-5.82742	5.01856	0.84192	0.930567	-5.5248	-11.082	0.379685	0.0660912	0.206268	-0.284645	-7.4655	7.45346	0.940314	0.9717	-0.135696	-0.492329	0.222214	0.456298	0.764447
258	PC(O-40:7) (a)	-0.0577164	-5.85595	6.09763	0.98487	0.987422	-4.37942	-10.5292	2.1931	0.186327	0.40172	1.69076	-6.31091	10.3758	0.68798	0.871516	-0.112825	-0.503915	0.279803	0.572178	0.834298
259	PC(O-40:7) (b)	0.615591	-5.87444	7.55312	0.856612	0.933828	-7.5132	-14.1241	-0.393374	0.0390403	0.140928	-1.09726	-9.73896	8.37181	0.812738	0.938306	-0.130035	-0.566173	0.308015	0.559503	0.824867
260	PC(P-15:0/20:4) (a)	-2.67759	-10.0696	5.32203	0.500066	0.708885	-6.02788	-13.9321	2.60218	0.165126	0.375905	-3.49198	-13.3994	7.54884	0.519519	0.773678	-0.0810482	-0.597788	0.438378	0.758858	0.92643
261	PC(P-15:0/20:4) (b)	-2.45885	-7.47786	2.83241	0.355037	0.595239	-4.28102	-9.74309	1.51161	0.144134	0.343262	-3.46145	-10.2072	3.79107	0.339902	0.634604	-0.235154	-0.580483	0.111375	0.18288	0.515824
262	PC(P-16:0/14:0)	-1.82984	-10.4905	7.66877	0.694664	0.840109	2.05436	-7.9087	13.0953	0.697569	0.859099	-2.93929	-14.4849	10.1652	0.643778	0.851582	-0.140964	-0.744498	0.466239	0.647831	0.872037
263	PC(P-16:0/16:0)	-0.609563	-8.94969	8.49451	0.891066	0.947369	2.8162	-6.73354	13.3438	0.576002	0.787677	-4.95789	-15.7204	7.17902	0.406311	0.682546	-0.350366	-0.921985	0.22455	0.231302	0.586977
264	PC(P-16:0/16:1)	-1.44567	-9.62653	7.47574	0.741487	0.873533	3.6006	-5.91883	14.0832	0.47133	0.711129	-3.95156	-14.7128	8.16745	0.505433	0.767069	-0.28869	-0.854243	0.280089	0.318569	0.670035
265	PC(P-16:0/18:0)	0.375904	-10.2312	12.2364	0.947416	0.973426	1.20449	-10.6179	14.5906	0.849926	0.925823	-2.80053	-16.6025	13.2856	0.715784	0.886239	-0.29149	-1.01976	0.442143	0.434487	0.752333
266	PC(P-16:0/18:1)	-0.817152	-8.15462	7.1065	0.833999	0.924706	-0.643217	-8.78397	8.22407	0.882194	0.943119	-5.34019	-14.8088	5.18083	0.306861	0.613722	-0.454106	-0.955039	0.04936	0.0769302	0.345409
267	PC(P-16:0/18:2)	-2.71857	-10.8078	6.10435	0.533175	0.732997	-0.664456	-9.80781	9.40582	0.892185	0.948559	-3.7978	-14.5947	8.36405	0.523219	0.775875	-0.474615	-1.04014	0.0941401	0.101603	0.411732
268	PC(P-16:0/18:3)	-3.45671	-9.84644	3.3859	0.313405	0.555878	-4.19298	-11.2191	3.38917	0.269809	0.508108	-1.35683	-10.1977	8.35442	0.775177	0.911834	-0.455051	-0.901474	-0.00661552	0.0467325	0.278238
269	PC(P-16:0/20:4)	0.226258	-7.84994	9.01027	0.957882	0.974245	-3.2142	-11.8485	6.26577	0.492565	0.727545	-4.0261	-14.4693	7.69216	0.483834	0.749863	-0.326384	-0.874514	0.224776	0.244756	0.603315
270	PC(P-16:0/20:5)	-0.538429	-8.23379	7.80225	0.895287	0.94925	-9.63642	-17.3781	-1.1693	0.0266687	0.10864	0.0275295	-10.4297	11.7057	0.996095	0.998676	-0.246953	-0.772826	0.281706	0.358608	0.693906
271	PC(P-16:0/22:6)	-0.397872	-7.50311	7.25316	0.91578	0.961756	-3.16705	-10.8188	5.14116	0.44288	0.692503	-5.78341	-14.8757	4.28001	0.249406	0.549973	-0.257087	-0.740444	0.228624	0.298425	0.655594
272	PC(P-17:0/20:4) (a)	-1.25499	-8.16864	6.17917	0.732689	0.868455	-8.3682	-15.4754	-0.663419	0.0339251	0.12999	-4.5019	-13.5495	5.49258	0.36376	0.653167	-0.386483	-0.859964	0.0892585	0.110974	0.414947
273	PC(P-17:0/20:4) (b)	-2.07974	-8.09326	4.32725	0.515126	0.721244	-4.79706	-11.2772	2.15638	0.171331	0.385433	-5.11325	-13.0115	3.50211	0.236055	0.540898	-0.429877	-0.84324	-0.0147918	0.0424157	0.264756
274	PC(P-18:0/18:2)	-0.746602	-8.20534	7.31819	0.850627	0.931238	-3.94292	-11.9371	4.77701	0.363585	0.619857	0.381373	-9.81594	11.7317	0.944386	0.973201	-0.269159	-0.779251	0.243555	0.302356	0.656394
275	PC(P-18:0/20:4)	-0.250467	-7.34442	7.38661	0.946793	0.973426	-3.56117	-11.1585	4.68583	0.38579	0.643351	-2.60801	-11.9783	7.75981	0.608104	0.831225	-0.283854	-0.765549	0.200178	0.249413	0.608976
276	PC(P-18:0/22:5)	-0.541407	-6.49216	5.78805	0.862855	0.934644	-6.65782	-12.8483	-0.0275986	0.0490885	0.168117	-0.803264	-8.85015	7.95402	0.851543	0.953827	-0.233184	-0.636387	0.171655	0.258003	0.616425
277	PC(P-18:0/22:6)	1.7597	-4.78157	8.75035	0.606293	0.786054	-6.01233	-12.7075	1.19637	0.0998999	0.274193	-2.74854	-11.2171	6.52782	0.5482	0.788674	-0.409816	-0.84319	0.0254524	0.0649023	0.337085
278	PC(P-18:1/18:1)	1.22058	-6.03368	9.03486	0.748775	0.879442	1.62244	-6.4449	10.3854	0.702488	0.863057	-2.10022	-11.5912	8.40968	0.682826	0.871516	-0.114179	-0.600559	0.37458	0.645923	0.871795
279	PC(P-18:1/22:6)	1.48769	-4.77435	8.16152	0.648994	0.815457	-7.94924	-14.2443	-1.19207	0.0219981	0.0920142	-0.486009	-8.80806	8.5955	0.912792	0.968297	-0.140157	-0.556739	0.27817	0.510193	0.792422
280	PC(P-20:0/20:4)	-0.169954	-6.0308	6.05643	0.955984	0.973687	-7.35734	-13.3865	-0.908502	0.0260995	0.106884	-2.34755	-10.1221	6.09954	0.574079	0.808962	-0.224193	-0.619644	0.172831	0.267453	0.627298
281	PC(P-35:2)(a)	-1.29526	-9.75584	7.95851	0.775188	0.895129	-7.67929	-16.4375	1.9969	0.115931	0.298108	1.27832	-10.4327	14.5206	0.839192	0.945465	-0.246055	-0.831099	0.34244	0.411083	0.734727
282	PC(P-35:2)(b)	-1.56667	-10.7818	8.60032	0.752486	0.879729	-3.42983	-13.4311	7.72688	0.530933	0.763832	4.39978	-8.76472	19.4638	0.530639	0.775875	-0.321476	-0.962524	0.323723	0.327407	0.672723
283	PC(P-36:3)	-2.6631	-8.99746	4.11219	0.431125	0.655581	-4.13856	-11.0514	3.31149	0.267834	0.506854	-3.09613	-11.6375	6.27089	0.503485	0.765614	-0.321675	-0.760971	0.119565	0.152484	0.505159
284	PC(P-38:5) (a)	-1.06634	-7.63519	5.96967	0.759355	0.881171	-5.6758	-12.6152	1.81462	0.133685	0.32641	-0.896234	-9.80639	8.89415	0.85119	0.953827	-0.142533	-0.591835	0.308801	0.53471	0.809913
285	PC(P-38:5) (b)	-2.12948	-9.02518	5.2889	0.563073	0.757311	-4.1186	-11.6022	3.9985	0.309826	0.555104	-5.20648	-14.2433	4.78258	0.294985	0.600838	-0.200342	-0.677807	0.27942	0.411815	0.734727
286	LPC(14:0) [sn1]	4.05668	-2.09728	10.5975	0.200651	0.424328	-4.30378	-10.5774	2.40994	0.203084	0.424962	-9.13353	-16.4205	-1.21123	0.0247974	0.186341	0.116786	-0.283023	0.518198	0.566944	0.832666
287	LPC(14:0) [sn2]	2.46275	-3.45728	8.7458	0.422366	0.647975	-4.28607	-10.4167	2.26407	0.194198	0.417526	-8.38477	-15.5643	-0.59473	0.0354914	0.220619	-0.114595	-0.504026	0.276359	0.564513	0.830671
288	LPC(15-MHDA) [sn1] [104_sn1]	7.25956	-0.586123	15.7244	0.070494	0.216594	-16.3309	-23.1095	-8.95474	3.90101e-05	0.000888054	-2.55452	-12.1937	8.14279	0.625779	0.838404	-0.212948	-0.709238	0.285823	0.401406	0.731032
289	LPC(15-MHDA) [sn1] / LPC(17:0) [sn2]	8.00983	1.20224	15.2754	0.0204361	0.0958641	-12.7404	-18.8355	-6.18758	0.000239061	0.00393688	-0.963007	-9.42087	8.28461	0.831482	0.943041	-0.304652	-0.729757	0.122274	0.161335	0.505559
290	LPC(15-MHDA) [sn2]	7.47034	-0.373126	15.9313	0.0623814	0.198357	-16.7651	-23.4935	-9.44509	2.22274e-05	0.000554969	-1.26435	-11.0095	9.54799	0.810039	0.938306	-0.254856	-0.749784	0.242541	0.314091	0.664225
291	LPC(15:0) [sn1]	5.36628	-0.710404	11.8149	0.0844617	0.240343	-6.77444	-12.7348	-0.406968	0.0374792	0.138799	-2.1037	-9.76165	6.20414	0.608389	0.831225	-0.133024	-0.521653	0.257123	0.502798	0.792422
292	LPC(15:0) [sn2]	3.84912	-2.50294	10.615	0.240369	0.477039	-9.81347	-15.9277	-3.25464	0.0039985	0.03158	-5.12994	-12.9955	3.44671	0.232555	0.535706	-0.198547	-0.611159	0.215778	0.346488	0.68846
293	LPC(16:0) [sn1]	9.02875	2.90535	15.5165	0.00344241	0.02618	-0.637739	-6.82479	5.96015	0.845112	0.925823	-0.885491	-8.43808	7.29008	0.82564	0.943041	0.0322747	-0.346532	0.412522	0.867392	0.965127
294	LPC(16:0) [sn2]	9.37735	2.90118	16.2611	0.00406683	0.029418	-1.58884	-8.0479	5.32393	0.643283	0.829835	3.00096	-5.26865	11.9925	0.48804	0.749863	0.100848	-0.299377	0.502679	0.621388	0.861445
295	LPC(16:1) [sn1]	0.647855	-5.80791	7.54609	0.848341	0.930567	-0.4276	-7.50528	7.19166	0.909164	0.958278	-6.06023	-14.2229	2.87921	0.177306	0.467291	-0.216591	-0.649834	0.218541	0.328145	0.672723
296	LPC(16:1) [sn2]	1.95966	-5.17524	9.63141	0.599507	0.786054	1.36965	-6.48862	9.8883	0.740679	0.890468	-6.50701	-15.36	3.27192	0.184569	0.479383	-0.0734163	-0.548121	0.403555	0.762063	0.927416
297	LPC(17:0) [sn1]	8.0909	1.99492	14.5512	0.00870339	0.0518186	-9.95133	-15.5817	-3.94545	0.00150628	0.0161486	1.26949	-6.47906	9.66004	0.755716	0.901269	-0.224651	-0.6041	0.156247	0.24682	0.606472
298	LPC(17:1) (a) [sn1] [104_sn1]	2.74646	-4.06438	10.0408	0.43815	0.661499	-12.5139	-18.9397	-5.57878	0.000618689	0.00855116	-5.91308	-14.3585	3.36519	0.203582	0.498194	-0.301514	-0.749343	0.148335	0.18823	0.524735
299	LPC(17:1) [sn1] (a) / LPC(17:1) [sn2] (b)	2.24719	-4.25146	9.18692	0.506533	0.715431	-10.2351	-16.5578	-3.43335	0.00382937	0.0308023	-6.02801	-14.1201	2.82652	0.175599	0.465478	-0.294574	-0.723414	0.136119	0.179401	0.515824
300	LPC(17:1) [sn1] (b)	3.25896	-4.0972	11.1794	0.394423	0.622517	-2.38118	-10.0846	5.98225	0.564964	0.78086	-1.87839	-11.3349	8.58672	0.713382	0.886239	-0.481849	-0.963444	0.00208693	0.0509905	0.288877
301	LPC(17:1) [sn2] (a)	2.18571	-4.4449	9.27642	0.527001	0.728391	-9.34307	-15.8617	-2.31945	0.010073	0.0605	-6.75877	-14.9538	2.22588	0.135709	0.407126	-0.436099	-0.873576	0.00330834	0.0517405	0.289503
302	LPC(18:0) [sn1]	9.28915	3.47392	15.4312	0.00149517	0.014113	-4.01559	-9.67898	2.0029	0.18616	0.40172	0.661332	-6.60986	8.49865	0.862973	0.957457	-0.0898844	-0.447814	0.269332	0.622831	0.861445
303	LPC(18:0) [sn2]	9.62859	3.57889	16.0316	0.00154696	0.0142541	-2.26472	-8.24467	4.10496	0.476384	0.714576	1.61752	-5.99218	9.84321	0.685723	0.871516	-0.157248	-0.528565	0.215455	0.40714	0.733639
304	LPC(18:1) [sn1]	0.0830346	-5.28084	5.75067	0.976401	0.986599	-0.26067	-6.18802	6.04119	0.933347	0.971449	-3.5553	-10.5718	4.01167	0.346949	0.639377	-0.222875	-0.582981	0.138535	0.225997	0.581416
305	LPC(18:1) [sn2]	1.60243	-4.67262	8.29054	0.624487	0.79893	2.68095	-4.3477	10.2261	0.463972	0.702767	-2.69745	-10.8422	6.19131	0.539214	0.781557	-0.167027	-0.583903	0.251598	0.433002	0.752333
306	LPC(18:2) [sn1]	-8.23217	-14.4014	-1.61834	0.0156315	0.0780566	-6.1885	-13.1761	1.36141	0.105574	0.280952	-14.8793	-22.6267	-6.35619	0.000970799	0.0357809	-0.280975	-0.735448	0.17558	0.226857	0.581416
307	LPC(18:2) [sn2]	-6.31182	-12.5251	0.342814	0.0625311	0.198357	-4.89876	-11.8872	2.64389	0.196691	0.420549	-13.1616	-20.9601	-4.59379	0.00335117	0.0665078	-0.205122	-0.653602	0.245383	0.370972	0.710724
308	LPC(18:3) (a) [sn1] [104_sn1]	-3.31067	-10.5359	4.49802	0.394905	0.622517	-10.078	-17.5197	-1.96483	0.0160317	0.0780412	-12.9043	-21.703	-3.11693	0.0110883	0.130769	-0.27592	-0.783002	0.233753	0.287544	0.643233
309	LPC(18:3) [sn1] (a)/LPC(18:3) [sn2] (b)	-6.91344	-13.4138	0.0748741	0.0524084	0.177732	-6.53505	-13.7654	1.30154	0.0997698	0.274193	-14.6615	-22.7255	-5.75585	0.00179252	0.0462469	-0.547986	-1.01941	-0.0743154	0.0234894	0.193359
310	LPC(18:3) [sn1] (b)	-8.23593	-15.5386	-0.301863	0.0422376	0.150654	-2.31169	-10.919	7.12723	0.618658	0.811596	-15.2203	-24.3328	-5.01033	0.00449979	0.0773964	-0.701804	-1.24083	-0.159835	0.0113034	0.124983
311	LPC(18:3) [sn2] (a)	-1.28284	-8.32925	6.30521	0.732158	0.868455	-11.6034	-18.5927	-4.01398	0.00340199	0.0289356	-11.1443	-19.7244	-1.64714	0.0226546	0.181774	-0.137691	-0.621933	0.348911	0.577936	0.840831
312	LPC(19:0) (a) [sn1] [104_sn1]	2.30371	-9.76247	15.9833	0.721649	0.863302	-33.8938	-42.5065	-23.9911	9.48013e-09	5.24116e-07	-10.8513	-24.9455	5.8896	0.190403	0.480688	-0.416137	-1.23311	0.40759	0.320527	0.672326
313	LPC(19:0) [sn1] (a) / LPC(19:0) [sn2] (b)	1.38985	-8.47326	12.3158	0.791192	0.906281	-29.8977	-37.44	-21.446	1.62339e-09	1.04709e-07	-7.86951	-19.9324	6.01081	0.251807	0.553043	-0.496104	-1.16229	0.17457	0.146462	0.495029
314	LPC(19:0) [sn1] (b)	1.79496	-6.10897	10.3643	0.665686	0.821756	-23.0028	-29.6228	-15.7602	1.7864e-08	9.21783e-07	-4.98322	-14.9515	6.15338	0.365402	0.653167	-0.442072	-0.968856	0.0875149	0.101505	0.411732
315	LPC(19:0) [sn2] (a)	4.00916	-7.64589	17.1351	0.516213	0.721244	-33.3381	-41.5926	-23.917	2.98009e-09	1.7743e-07	-7.62664	-21.5181	8.72359	0.33944	0.634604	-0.708892	-1.48045	0.0687123	0.0737955	0.345409
316	LPC(19:1) (a)	5.1458	-2.69891	13.623	0.204236	0.427239	-9.01996	-16.5374	-0.825375	0.0317444	0.124092	-3.84225	-13.5413	6.94481	0.469513	0.743156	-0.294464	-0.800623	0.214277	0.255583	0.616265
317	LPC(19:1) (b)	3.09273	-3.37137	9.98926	0.355957	0.595239	-11.5684	-17.7135	-4.96432	0.00085232	0.0108147	-1.33907	-9.7218	7.82203	0.765664	0.906153	-0.425374	-0.847702	-0.00124689	0.0493339	0.288877
318	LPC(19:1) (c)	2.28252	-5.79422	11.0517	0.590189	0.779533	-11.6357	-19.3615	-3.16977	0.0081346	0.0529091	-0.655694	-11.2523	11.2062	0.908843	0.968297	-0.490872	-1.0267	0.0478552	0.0739728	0.345409
319	LPC(20:0) [sn1]	3.10472	-2.26036	8.76428	0.261589	0.504912	-9.70649	-14.9169	-4.17704	0.000789861	0.0101892	-4.27183	-11.0356	3.00616	0.242417	0.541651	-0.153671	-0.503277	0.197163	0.389525	0.719017
320	LPC(20:0) [sn2]	5.85351	-0.561548	12.6824	0.0744368	0.218238	-14.704	-20.4336	-8.56189	8.49143e-06	0.000262895	-6.42233	-14.1102	1.95362	0.128862	0.395178	-0.316701	-0.724917	0.093194	0.129507	0.46193
321	LPC(20:1) [sn1]	3.33055	-2.23757	9.21579	0.245852	0.482968	-4.1934	-9.91797	1.89497	0.17259	0.385433	-0.654143	-7.92066	7.18581	0.865307	0.958151	-0.000151209	-0.36308	0.364099	0.999349	0.999552
322	LPC(20:1) [sn2]	4.4624	-1.44669	10.7258	0.141423	0.339942	-2.71803	-8.81893	3.79108	0.403698	0.64961	0.129072	-7.55506	8.45191	0.9747	0.987449	-0.165279	-0.546129	0.21703	0.395674	0.724
323	LPC(20:2) [sn1]	-0.703365	-6.47119	5.42016	0.816884	0.918995	-0.0295133	-6.46693	6.85096	0.993054	0.998212	-3.06567	-10.7023	5.22404	0.45643	0.728441	-0.276227	-0.667168	0.116254	0.16717	0.50741
324	LPC(20:2) [sn2]	-0.453962	-6.69561	6.20523	0.890285	0.947369	1.75948	-5.31176	9.3588	0.634515	0.823872	-2.57303	-10.8508	6.47339	0.564441	0.803084	-0.389921	-0.812395	0.034353	0.0715402	0.345409
325	LPC(20:3) [sn1]	-7.3345	-13.3866	-0.859468	0.0271422	0.111797	-5.00645	-11.8813	2.40477	0.179869	0.394386	-13.7884	-21.4144	-5.42237	0.00173761	0.0462469	-0.317636	-0.758587	0.125273	0.159249	0.505159
326	LPC(20:3) [sn2]	-5.98099	-12.135	0.604049	0.0740835	0.218238	-4.84652	-11.748	2.59467	0.19554	0.419246	-13.1073	-20.8102	-4.65505	0.00307403	0.0665078	-0.373599	-0.815301	0.070069	0.0985781	0.409443
327	LPC(20:4) [sn1]	-8.22164	-14.4006	-1.59666	0.0159283	0.0783986	-12.0965	-18.6536	-5.01091	0.00115258	0.0132387	-18.5323	-25.9579	-10.362	2.92879e-05	0.00226688	-0.345343	-0.800211	0.11161	0.138045	0.479134
328	LPC(20:4) [sn2]	-7.59261	-13.5146	-1.26509	0.0195372	0.092206	-10.8147	-17.1486	-3.9967	0.00238025	0.0225861	-16.4755	-23.7269	-8.53465	0.000110264	0.00571888	-0.396322	-0.828394	0.0376334	0.0733233	0.345409
329	LPC(20:5) [sn1]	-3.51894	-12.7652	6.70739	0.485215	0.701365	-13.1562	-22.3619	-2.8589	0.0137026	0.071169	-11.3403	-22.7798	1.79377	0.0875635	0.333721	-0.45353	-1.10963	0.206919	0.17751	0.515824
330	LPC(20:5) [sn2]	-0.871611	-10.437	9.71532	0.865509	0.934644	-11.2093	-20.6858	-0.600582	0.0389983	0.140928	-10.4376	-22.0715	2.93317	0.120259	0.381476	-0.40248	-1.06365	0.263108	0.234843	0.590157
331	LPC(22:0) [sn1]	1.66888	-2.98672	6.5479	0.488274	0.701365	-3.87619	-8.75924	1.26819	0.136954	0.332295	-4.86522	-10.7876	1.45033	0.128041	0.395178	-0.0459639	-0.35302	0.262038	0.769261	0.929029
332	LPC(22:0) [sn2]	1.40357	-3.81732	6.90785	0.604739	0.786054	-0.76965	-6.4355	5.2393	0.79642	0.908211	-2.04326	-8.89219	5.32052	0.576113	0.808962	-0.112207	-0.458176	0.234964	0.525337	0.800414
333	LPC(22:1) [sn1]	1.82021	-3.24106	7.14623	0.487423	0.701365	-6.8837	-12.0173	-1.45052	0.0137924	0.071169	-3.59948	-10.109	3.38145	0.303525	0.611792	-0.0286464	-0.362655	0.306482	0.866532	0.965127
334	LPC(22:1) [sn2]	5.06794	-0.649119	11.114	0.0831936	0.237608	-5.73267	-11.4201	0.319967	0.0629346	0.197212	-0.669897	-8.00551	7.25065	0.863443	0.957457	-0.172858	-0.538793	0.194425	0.355222	0.690382
335	LPC(22:4) [sn1]	-4.57619	-10.1979	1.3975	0.130281	0.319107	-5.31202	-11.4958	1.30378	0.11298	0.293444	-11.1444	-18.2431	-3.42935	0.00548961	0.0833129	-0.379065	-0.775323	0.0187759	0.0617732	0.327483
336	LPC(22:4) [sn2]	-1.32193	-7.2426	4.97665	0.67289	0.823062	-3.35834	-9.78563	3.52687	0.330032	0.575822	-8.26928	-15.7312	-0.146597	0.0461805	0.24822	-0.378413	-0.782196	0.0270124	0.0672488	0.343534
337	LPC(22:5) (n3) [sn1] [104_sn1]	-2.43884	-9.48218	5.15254	0.517786	0.721244	-17.2971	-23.9105	-10.1088	9.16324e-06	0.000272783	-11.3656	-20.0205	-1.77398	0.0214501	0.18046	-0.303644	-0.792793	0.187918	0.225108	0.581416
338	LPC(22:5) [sn1] (n3)/LPC(22:5) [sn2] (n6)	-2.33587	-8.67408	4.44223	0.489324	0.701365	-10.6521	-17.0776	-3.72876	0.00315944	0.0271712	-8.74461	-16.7663	0.050188	0.0512584	0.25997	-0.311676	-0.74977	0.128353	0.164445	0.506299
339	LPC(22:5) [sn1] (n6)	-3.60412	-11.8096	5.36487	0.418075	0.64617	-3.12676	-12.2536	6.94945	0.528609	0.763328	-10.1025	-20.4269	1.56142	0.0869505	0.333721	-0.442343	-1.02202	0.140733	0.136493	0.478036
340	LPC(22:5) [sn2] (n3)	0.239516	-6.89333	7.9188	0.94927	0.973426	-13.2397	-20.0784	-5.81585	0.000726458	0.00953015	-9.07174	-17.825	0.613977	0.0655054	0.30728	-0.394928	-0.876369	0.0888511	0.109249	0.414504
341	LPC(22:6) [sn1]	-0.562585	-7.40012	6.77983	0.876453	0.94088	-6.07521	-13.2304	1.67	0.120843	0.306664	-10.4253	-18.7619	-1.23328	0.0272465	0.198951	-0.384467	-0.849195	0.0824385	0.10622	0.41323
342	LPC(22:6) [sn2]	0.947858	-5.47689	7.8093	0.778229	0.896353	-4.2865	-11.0373	2.97655	0.239908	0.473696	-8.88935	-16.7455	-0.291874	0.0430442	0.239904	-0.354187	-0.783369	0.0768511	0.106964	0.41323
343	LPC(24:0) [sn1]	1.09341	-3.70436	6.13022	0.660628	0.821756	-4.01299	-9.06611	1.32092	0.137437	0.332425	-3.67023	-9.88334	2.97123	0.271129	0.574941	-0.0513922	-0.369867	0.2681	0.751853	0.924695
344	LPC(24:0) [sn2]	3.40789	-2.01916	9.13553	0.222627	0.452265	-2.16965	-7.86326	3.87579	0.472743	0.711488	-3.15512	-10.0559	4.27515	0.394686	0.674997	-0.188812	-0.541373	0.164998	0.294625	0.649685
345	LPC(26:0) [sn1]	4.25079	-2.72126	11.7225	0.238009	0.47357	-3.95749	-11.0743	3.72885	0.303397	0.55184	-5.2622	-13.8408	4.17049	0.263787	0.565571	-0.0586484	-0.511695	0.396461	0.799896	0.945344
346	LPC(26:0) [sn2]	6.75652	0.433046	13.4781	0.0358904	0.133554	1.89678	-4.79367	9.05739	0.587065	0.791618	-2.33874	-10.1827	6.19024	0.579024	0.808962	-0.434639	-0.832883	-0.0347945	0.0332112	0.229513
347	LPC(O-16:0)	6.56981	0.736177	12.7413	0.0268062	0.111797	1.73641	-4.43847	8.31029	0.589419	0.793409	-1.52583	-8.84148	6.37693	0.695792	0.87568	-0.272087	-0.639916	0.0971029	0.14811	0.496263
348	LPC(O-18:0)	7.11377	0.623553	14.0226	0.0312284	0.121623	3.54486	-3.40925	10.9996	0.325477	0.572543	-3.10195	-11.0611	5.56946	0.470546	0.74327	-0.219137	-0.627674	0.19108	0.294072	0.649685
349	LPC(O-18:1)	4.71496	-1.28682	11.0816	0.125804	0.316144	-1.81677	-8.05541	4.84518	0.583547	0.791618	0.865744	-6.97624	9.36881	0.83438	0.943041	-0.0487655	-0.435249	0.339218	0.804783	0.945344
350	LPC(O-20:0)	4.83769	-0.903265	10.9112	0.0999755	0.275377	-1.58733	-7.56269	4.77429	0.616073	0.810953	-2.32152	-9.58073	5.5205	0.550481	0.789023	-0.176078	-0.544401	0.193609	0.349482	0.69005
351	LPC(O-20:1)	4.84627	-1.22636	11.2923	0.119813	0.310052	-4.19806	-10.3493	2.37528	0.204851	0.427372	-3.76755	-11.3273	4.43668	0.356958	0.646772	-0.086481	-0.477006	0.305576	0.664529	0.883756
352	LPC(O-22:0)	3.21016	-1.7174	8.38476	0.20511	0.427912	-4.13515	-9.21197	1.22557	0.127965	0.319973	-2.45928	-8.78781	4.30835	0.466275	0.740176	-0.218916	-0.538804	0.102002	0.180619	0.515824
353	LPC(O-22:1)	4.25823	-1.53082	10.3876	0.152204	0.356988	-4.98178	-10.8314	1.25164	0.114752	0.296061	-0.829722	-8.30176	7.25118	0.834603	0.943041	-0.152889	-0.52659	0.222215	0.423224	0.744489
354	LPC(O-24:0)	3.75374	-1.88876	9.72075	0.196078	0.416163	-5.85177	-11.529	0.189767	0.0573799	0.188187	0.679833	-6.75149	8.70338	0.862285	0.957457	-0.025923	-0.392195	0.341695	0.889711	0.965127
355	LPC(O-24:1)	4.48821	-0.80221	10.0608	0.0975377	0.271562	-5.35186	-10.6667	0.279122	0.0620806	0.196124	0.97605	-5.96795	8.43284	0.788984	0.922467	-0.0368247	-0.377167	0.30468	0.832101	0.957607
356	LPC(O-24:2)	4.67087	-1.15192	10.8367	0.117782	0.308115	-1.52096	-7.59494	4.95227	0.63651	0.823872	0.733234	-6.87055	8.95784	0.855007	0.95577	-0.138742	-0.513211	0.237135	0.468247	0.779352
357	LPC(P-16:0)	2.73067	-2.68587	8.44869	0.329056	0.565976	-2.3218	-8.03286	3.74392	0.444096	0.693004	-3.56498	-10.4682	3.87048	0.337513	0.634072	-0.297535	-0.651389	0.0575788	0.100291	0.410717
358	LPC(P-17:0) (a)	4.43046	-2.07488	11.368	0.186097	0.408969	-7.01552	-13.4351	-0.119832	0.0462938	0.160309	-3.94841	-12.0569	4.90774	0.370038	0.659861	-0.473085	-0.892378	-0.0520181	0.0277655	0.208701
359	LPC(P-17:0) (b)	3.43262	-2.34424	9.55121	0.249231	0.487133	-4.89061	-10.7801	1.38763	0.123953	0.312507	-3.35994	-10.6835	4.56417	0.394705	0.674997	-0.605882	-0.980126	-0.230223	0.00163651	0.0406489
360	LPC(P-18:0)	2.47251	-3.06479	8.32611	0.388208	0.616987	-0.994068	-6.92627	5.31624	0.750933	0.891445	-1.22724	-8.4718	6.59073	0.750312	0.89829	-0.300403	-0.663279	0.0637979	0.105664	0.41323
361	LPC(P-18:1)	4.2233	-1.77213	10.5847	0.170812	0.386575	-3.83421	-9.96692	2.71624	0.244391	0.478884	-1.88953	-9.54486	6.41369	0.644847	0.851582	-0.136087	-0.523683	0.25302	0.491874	0.78822
362	LPC(P-20:0)	3.51729	-1.68775	8.99791	0.188685	0.411922	-2.18272	-7.63761	3.59434	0.450337	0.699409	-2.43904	-9.10227	4.71263	0.493272	0.754531	-0.222743	-0.560046	0.115705	0.196408	0.539078
363	PE(15-MHDA_18:1)	8.4956	-0.749528	18.6019	0.0726742	0.218238	-6.04562	-14.9067	3.73818	0.21681	0.447337	7.3067	-5.02968	21.2455	0.257216	0.554555	0.719616	0.132531	1.31014	0.0163044	0.161328
364	PE(15-MHDA_18:2)	11.5614	0.974476	23.2584	0.0315651	0.122157	-14.2842	-23.282	-4.23106	0.00653058	0.0451319	7.55477	-6.18948	23.3127	0.295902	0.601125	0.558481	-0.0974921	1.21876	0.0951951	0.402628
365	PE(15-MHDA_20:4)	10.4789	1.51019	20.24	0.0211384	0.0979206	-13.3797	-21.1645	-4.82629	0.00285367	0.0250994	5.35806	-6.19033	18.3281	0.377611	0.664508	0.28981	-0.265986	0.848704	0.306854	0.659737
366	PE(15-MHDA_22:6)	14.2545	3.33722	26.3251	0.00939337	0.0538553	-25.0833	-33.0013	-16.2294	5.13774e-07	2.20923e-05	5.40241	-8.15786	20.9648	0.453331	0.728441	0.138368	-0.519584	0.800671	0.68052	0.888832
367	PE(16:0_16:0)	18.4156	8.50019	29.237	0.00016214	0.00291851	7.80776	-2.18434	18.8206	0.12954	0.321358	17.7754	4.46654	32.7798	0.00757527	0.104701	0.785168	0.208321	1.36534	0.00765688	0.0952414
368	PE(16:0_16:1)	11.7182	1.01932	23.5501	0.031031	0.121623	4.27901	-6.76699	16.6337	0.462659	0.702154	23.6406	7.69891	41.9419	0.00264363	0.0620052	0.932447	0.267718	1.60158	0.00598404	0.0843069
369	PE(16:0_18:1)	16.7424	3.7599	31.3492	0.0101533	0.056537	5.91018	-7.10525	20.7492	0.390103	0.643351	23.6107	5.15987	45.2989	0.0102597	0.124606	1.15903	0.379266	1.94485	0.00357968	0.0583264
370	PE(16:0_18:2)	14.7353	4.33375	26.1738	0.00465616	0.0322721	1.02536	-9.10811	12.2886	0.849727	0.925823	21.6403	6.77838	38.5707	0.0032782	0.0665078	0.965791	0.337947	1.59756	0.00258431	0.0508704
371	PE(16:0_18:3) (a)	26.0044	8.04001	46.9557	0.00328921	0.02618	-1.06934	-16.6259	17.3899	0.901816	0.952259	37.931	11.7022	70.3186	0.00286454	0.0652104	1.72729	0.705399	2.75955	0.000918295	0.0284304
372	PE(16:0_18:3) (b)	9.2927	-0.871199	20.4987	0.0742998	0.218238	6.77241	-4.21247	19.017	0.236321	0.469006	18.2957	3.47613	35.2376	0.0139699	0.140425	0.591616	-0.0508085	1.23817	0.0710835	0.345409
373	PE(16:0_20:3)	13.832	4.38935	24.1287	0.00342968	0.02618	3.74403	-5.78214	14.2334	0.453853	0.699452	18.7367	5.44245	33.7072	0.00465967	0.078404	0.88737	0.315551	1.46245	0.002371	0.0482935
374	PE(16:0_20:4)	10.4948	3.16143	18.3495	0.00446723	0.0320152	3.99596	-3.65174	12.2507	0.314122	0.559081	11.136	1.14818	22.11	0.0280449	0.202867	0.478073	0.0261747	0.932013	0.0381392	0.250167
375	PE(16:0_20:5)	15.394	4.85579	26.9913	0.00345008	0.02618	0.0039177	-10.1005	11.244	0.999424	0.999536	17.5839	3.11386	34.0846	0.0157104	0.151999	0.220801	-0.407207	0.85277	0.49102	0.78822
376	PE(16:0_22:6)	11.2797	3.11416	20.0919	0.00606359	0.038787	-4.21152	-11.9965	4.2621	0.3192	0.564065	10.8912	-0.112277	23.1068	0.052506	0.261832	0.579311	0.0774365	1.0837	0.0236961	0.193359
377	PE(16:1_18:2)	13.5946	2.9762	25.3079	0.0109957	0.0599341	2.48258	-8.11497	14.3024	0.659206	0.837809	15.0163	0.53474	31.5839	0.0416129	0.238513	0.4841	-0.161101	1.13347	0.141441	0.488729
378	PE(16:1_20:4)	11.6396	3.11003	20.8748	0.00670489	0.041629	7.76079	-1.35651	17.7208	0.0973329	0.269056	16.7798	4.72152	30.2265	0.00535303	0.0830033	0.291384	-0.230464	0.815963	0.273799	0.630716
379	PE(17:0_18:1)	15.1292	4.63927	26.6708	0.00391666	0.0288714	-4.98973	-14.5677	5.66206	0.344512	0.59388	16.4976	2.19344	32.8039	0.0224158	0.181774	0.703176	0.0736569	1.33666	0.0285817	0.208701
380	PE(17:0_18:2)	13.4966	3.5811	24.3612	0.00672302	0.041629	-11.2642	-19.8434	-1.76692	0.0213258	0.0902136	17.1831	3.37692	32.833	0.0132562	0.139656	0.430059	-0.170769	1.0345	0.160671	0.505559
381	PE(17:0_20:4)	8.52489	1.19035	16.3911	0.0220194	0.0990875	-9.39288	-16.1775	-2.05909	0.0130849	0.0694117	7.02873	-2.76378	17.8074	0.16495	0.451723	0.256992	-0.202446	0.718544	0.272882	0.63048
382	PE(17:0_22:6)	17.0641	6.62828	28.5212	0.000976462	0.0099445	-12.6141	-21.2341	-3.05062	0.011028	0.0647977	12.2226	-1.26418	27.5516	0.0774368	0.325401	0.386505	-0.226867	1.00365	0.216885	0.572767
383	PE(18:0_18:1)	15.2783	3.47348	28.4299	0.00998467	0.056001	-2.36701	-13.4213	10.0987	0.695544	0.859099	14.7378	-1.06046	33.0586	0.0688622	0.308353	1.02844	0.314564	1.7474	0.00475665	0.0721892
384	PE(18:0_18:2)	14.8528	4.09861	26.718	0.00584508	0.0378269	-3.08582	-13.1244	8.11277	0.573668	0.785874	22.506	7.05573	40.186	0.00322819	0.0665078	0.931153	0.281932	1.58458	0.00495115	0.073696
385	PE(18:0_20:3) (a)	11.5469	3.42754	20.3035	0.00466987	0.0322721	-5.35987	-12.9899	2.93922	0.198548	0.42335	14.6248	3.34104	27.1406	0.00992449	0.124606	0.873297	0.374152	1.37493	0.000617076	0.0238809
386	PE(18:0_20:3) (b)	6.64183	-0.917845	14.7783	0.0863771	0.244893	1.6329	-6.3479	10.2938	0.697429	0.859099	4.51325	-5.51026	15.6	0.390189	0.674121	0.475182	-0.00856043	0.961264	0.0541908	0.297473
387	PE(18:0_20:4)	9.33948	2.46167	16.679	0.00715136	0.0439218	-4.03521	-10.7252	3.1561	0.263397	0.503381	8.14878	-1.06925	18.2257	0.0846903	0.332743	0.527236	0.0994556	0.956845	0.0157442	0.160342
388	PE(18:0_22:4)	7.94713	-2.76726	19.8422	0.151318	0.356988	-1.88317	-12.6529	10.2144	0.74822	0.891371	3.47848	-10.3402	19.427	0.639597	0.851582	0.711194	0.0225326	1.4046	0.0429598	0.265321
389	PE(18:0_22:5) (n3)	10.8502	0.233989	22.5907	0.0449297	0.158793	-10.3907	-19.8831	0.226509	0.0547965	0.182028	11.7966	-2.61853	28.3456	0.113164	0.369617	0.688633	0.0254802	1.35618	0.0418238	0.264756
390	PE(18:0_22:5) (n6)	10.6725	-0.431515	23.0149	0.060102	0.193025	-2.86363	-13.6407	9.25829	0.627692	0.817901	14.2349	-1.18242	32.0575	0.0719199	0.31273	0.765086	0.0682025	1.46682	0.0314138	0.219048
391	PE(18:0_22:6)	13.3848	3.85601	23.7879	0.00511094	0.0344145	-10.8172	-19.1132	-1.67048	0.0216343	0.0910051	11.8649	-0.821472	26.1741	0.0678431	0.308353	0.620974	0.0428736	1.20242	0.0352703	0.239467
392	PE(18:1_18:1)	13.1464	0.666311	27.1737	0.0383643	0.139408	-0.107532	-12.2841	13.7593	0.987036	0.998212	16.0854	-1.10408	36.2627	0.0680642	0.308353	0.919852	0.148632	1.69701	0.019397	0.174573
393	PE(18:1_18:2)	16.7916	4.69654	30.2838	0.00546631	0.0361617	3.45394	-8.39103	16.8305	0.583589	0.791618	23.389	6.21141	43.3447	0.00607839	0.0904745	0.80526	0.0844793	1.53123	0.0285448	0.208701
394	PE(18:1_22:6) (a)	13.4013	4.1096	23.5222	0.00400382	0.0292354	0.247825	-8.8451	10.2478	0.959243	0.982717	19.2982	6.10203	34.1356	0.00323767	0.0665078	0.506196	-0.056198	1.07175	0.0777043	0.345409
395	PE(18:1_22:6) (b)	15.6829	4.97363	27.4848	0.00335359	0.02618	-8.25933	-17.6551	2.20851	0.117668	0.300577	24.5209	8.99108	42.2636	0.00129179	0.0439839	0.501091	-0.137704	1.14397	0.124204	0.453461
396	PE(20:0_20:4)	-3.34978	-13.4931	7.98294	0.546384	0.746014	-7.24986	-18.0108	4.9234	0.231166	0.464734	-9.24822	-22.0481	5.65341	0.210488	0.499747	0.236351	-0.490487	0.968497	0.524319	0.800414
397	PE(36:0)	2.1379	0.00854983	4.31259	0.0490805	0.170351	0.748317	-1.5851	3.13706	0.532311	0.764395	1.80435	-1.09465	4.78833	0.224578	0.518876	0.0253765	-0.112851	0.163796	0.718709	0.905044
398	PE(38:5) (a)	11.0365	2.17404	20.6677	0.0137247	0.0716699	-1.30321	-10.0249	8.26389	0.780754	0.904255	15.7543	3.27628	29.7398	0.0120296	0.133013	0.636776	0.088806	1.18775	0.0227678	0.193359
399	PE(38:5) (b)	11.4237	1.22789	22.6465	0.0272274	0.111797	1.40343	-8.86263	12.8259	0.797703	0.908211	17.2539	2.79631	33.7449	0.0178388	0.162181	0.769386	0.136628	1.40614	0.0171756	0.166174
400	PE(O-16:0/18:2)	3.67664	-5.46881	13.7069	0.442852	0.665517	-7.47619	-16.5079	2.53248	0.137869	0.332431	4.46632	-7.95893	18.5689	0.498232	0.760614	0.105116	-0.499837	0.713748	0.733668	0.912957
401	PE(O-16:0/20:3)	5.90686	-6.02505	19.3538	0.346087	0.58515	-13.9235	-24.6393	-1.68399	0.02715	0.110021	3.25993	-12.3508	21.651	0.70083	0.879161	-0.00496162	-0.786442	0.782674	0.990094	0.999552
402	PE(O-16:0/20:4)	-1.00501	-9.37282	8.13541	0.822344	0.923794	-10.4075	-18.7896	-1.16013	0.0283868	0.113254	-2.73673	-13.8302	9.78485	0.652857	0.85501	-0.340072	-0.916116	0.239321	0.24891	0.608976
403	PE(O-16:0/22:4)	3.14749	-4.31889	11.1965	0.418257	0.64617	-7.21496	-14.6542	0.872707	0.0789603	0.235886	-1.63299	-11.2635	9.04265	0.753748	0.900311	-0.0785395	-0.57014	0.415492	0.754483	0.925467
404	PE(O-16:0/22:6)	3.87401	-3.38605	11.6796	0.303306	0.548502	-2.49944	-10.0487	5.68337	0.537561	0.767434	3.37471	-6.40226	14.1729	0.51202	0.770395	-0.446128	-0.91847	0.0284662	0.0653266	0.337085
405	PE(O-18:0/20:4)	2.64017	-6.99565	13.2743	0.603844	0.786054	-13.5487	-22.5268	-3.53005	0.00934609	0.057871	-1.61096	-14.0515	12.6303	0.813548	0.938306	0.0134318	-0.631651	0.662702	0.967497	0.999552
406	PE(O-18:0/22:5)	3.81435	-7.28648	16.2443	0.515876	0.721244	-23.9126	-32.9058	-13.7139	2.30783e-05	0.000558206	0.455386	-13.9748	17.3061	0.954132	0.973201	-0.111328	-0.850062	0.63291	0.768313	0.929029
407	PE(O-18:0/22:6)	4.97297	-2.37703	12.8763	0.189659	0.411922	-6.73635	-13.9704	1.10599	0.0903306	0.253118	2.57341	-7.14489	13.3088	0.61632	0.835432	-0.366651	-0.840246	0.109205	0.130535	0.463459
408	PE(O-18:1/18:2)	2.4699	-9.70986	16.2927	0.705056	0.850021	-3.88487	-16.5038	10.6412	0.580531	0.791618	13.8694	-4.26977	35.4456	0.142069	0.418106	-0.0334754	-0.860354	0.8003	0.936926	0.993398
409	PE(O-18:1/22:6)	3.86648	-3.43381	11.7187	0.307034	0.552661	-3.43401	-10.9527	4.71949	0.397527	0.646941	5.35151	-4.66759	16.4236	0.305987	0.613559	-0.131862	-0.608448	0.347009	0.588199	0.849935
410	PE(O-34:1)	8.86844	0.181121	18.3091	0.0452343	0.159143	-0.86892	-9.62686	8.73774	0.853051	0.925823	10.6628	-1.26352	24.0296	0.081507	0.327887	0.190345	-0.355057	0.738733	0.494105	0.789714
411	PE(O-36:5)	1.62861	-12.0913	17.4898	0.8269	0.924706	-20.5514	-32.3867	-6.64427	0.0052602	0.039148	0.586387	-17.5534	22.7172	0.953973	0.973201	-0.361793	-1.30578	0.591222	0.45488	0.764447
412	PE(O-38:5) (a)	0.827959	-6.58578	8.83009	0.832147	0.924706	-7.41236	-14.9525	0.796258	0.0754884	0.227346	6.30171	-4.2676	18.0379	0.252228	0.553043	-0.0213309	-0.521265	0.481116	0.933418	0.991037
413	PE(O-38:5) (b)	3.95606	-3.72638	12.2515	0.321351	0.561458	-0.982156	-9.08658	7.84474	0.820495	0.916352	7.87216	-2.90681	19.8478	0.157986	0.443047	-0.180277	-0.682036	0.324018	0.482187	0.782417
414	PE(P-15:0/20:4) (a)	3.7567	-6.9188	15.6566	0.50498	0.714542	-2.16623	-13.2956	10.3917	0.721844	0.877092	-4.8578	-18.019	10.4162	0.5115	0.770395	0.271449	-0.440626	0.988617	0.455335	0.764447
415	PE(P-15:0/20:4) (b)	4.60983	-10.2468	21.9256	0.563581	0.757311	8.95622	-8.11133	29.1939	0.323155	0.569755	-7.09224	-24.6933	14.6226	0.491807	0.753779	0.452094	-0.552799	1.46714	0.378597	0.717171
416	PE(P-15:0/22:6) (a)	8.88713	-1.02521	19.7922	0.0803019	0.232	-13.156	-21.903	-3.42942	0.00929589	0.057871	5.17925	-7.72385	19.8866	0.448906	0.723861	0.3662	-0.260626	0.996966	0.252301	0.612167
417	PE(P-15:0/22:6) (b)	4.71439	-4.18693	14.4427	0.308893	0.553342	0.105081	-9.31334	10.5017	0.983352	0.997529	0.298441	-11.2048	13.2919	0.961697	0.97803	-0.0611601	-0.642223	0.523301	0.836817	0.957607
418	PE(P-16:0/18:1)	7.58407	-0.612011	16.456	0.070519	0.216594	4.90431	-3.94588	14.5699	0.286453	0.531689	2.25279	-8.27552	13.9896	0.687335	0.871516	0.158536	-0.361065	0.680846	0.549965	0.824627
419	PE(P-16:0/18:2)	4.70432	-3.89287	14.0706	0.29241	0.540156	2.67936	-6.65369	12.9456	0.586	0.791618	3.01405	-8.40453	15.8561	0.619782	0.837182	-0.278488	-0.837719	0.283896	0.330486	0.672723
420	PE(P-16:0/18:3)	3.22087	-5.60103	12.8672	0.486147	0.701365	-2.24801	-11.4946	7.96463	0.653323	0.833068	-3.01751	-14.1997	9.62202	0.623464	0.837779	-0.322247	-0.905067	0.264001	0.280143	0.64117
421	PE(P-16:0/20:3) (a)	0.472748	-6.49461	7.95927	0.89749	0.949782	-2.1922	-9.70617	5.94706	0.586225	0.791618	-2.71115	-11.8415	7.36476	0.584052	0.813051	-0.161191	-0.631049	0.310889	0.502071	0.792422
422	PE(P-16:0/20:3) (b)	-0.0225073	-8.17816	8.85753	0.995857	0.995857	2.93737	-6.35854	13.1561	0.548241	0.769228	6.63765	-5.10689	19.8358	0.279825	0.583786	-0.0561705	-0.612851	0.503628	0.843453	0.958638
423	PE(P-16:0/20:4)	-0.639307	-8.09133	7.41693	0.871699	0.938379	-1.84346	-9.99632	7.04792	0.673595	0.8519	-5.69178	-15.2535	4.94873	0.282092	0.586933	-0.0292361	-0.539506	0.483652	0.910684	0.981712
424	PE(P-16:0/20:5)	3.45752	-7.40952	15.6	0.547697	0.746333	-1.34799	-12.8033	11.6123	0.829105	0.922022	9.35131	-6.08477	27.3245	0.249061	0.549973	-0.126948	-0.851802	0.603205	0.732096	0.912802
425	PE(P-16:0/22:4)	2.95323	-3.86815	10.2586	0.404722	0.636054	4.5065	-3.16588	12.7868	0.256684	0.496683	-3.89382	-12.5166	5.57882	0.406995	0.682546	-0.000708013	-0.449673	0.450282	0.997535	0.999552
426	PE(P-16:0/22:5) (n3)	3.63979	-4.44219	12.4053	0.387485	0.616987	-2.15045	-10.5994	7.09702	0.636532	0.823872	6.44959	-4.76565	18.9856	0.270653	0.574941	0.0145594	-0.517019	0.548978	0.95723	0.997988
427	PE(P-16:0/22:5) (n6)	0.355109	-6.81154	8.07291	0.925169	0.96763	5.10137	-3.21259	14.1295	0.236183	0.469006	0.57899	-9.13757	11.3346	0.911175	0.968297	-0.115328	-0.599911	0.371617	0.641374	0.87082
428	PE(P-16:0/22:6)	3.3969	-3.30738	10.566	0.328151	0.565976	0.0182503	-7.1682	7.76103	0.996166	0.998747	3.15817	-5.90185	13.0905	0.506748	0.767559	-0.224064	-0.66214	0.215944	0.317139	0.668844
429	PE(P-17:0/20:4) (a)	-0.277058	-7.25806	7.22943	0.940176	0.971557	-9.20992	-16.2507	-1.57723	0.0190617	0.0852819	-0.698543	-10.105	9.69217	0.890017	0.968297	-0.371787	-0.845258	0.103946	0.125156	0.454791
430	PE(P-17:0/20:4) (b)	-1.20231	-8.384	6.54234	0.753033	0.879729	-4.26556	-11.9735	4.11732	0.30817	0.553921	-2.43823	-12.0296	8.19887	0.639617	0.851582	-0.217969	-0.71103	0.27754	0.387313	0.717746
431	PE(P-17:0/22:6) (a)	3.28494	-3.93848	11.0515	0.381635	0.614081	-5.90974	-13.1995	1.9922	0.138455	0.332809	0.39259	-9.10821	10.8865	0.938329	0.9717	-0.440756	-0.91343	0.0341733	0.0688112	0.344457
432	PE(P-17:0/22:6) (b)	2.57734	-4.29272	9.94054	0.471231	0.692092	-3.3437	-10.5163	4.40381	0.386696	0.643351	1.64895	-7.56856	11.7857	0.735549	0.889043	-0.413804	-0.865916	0.0403694	0.0740011	0.345409
433	PE(P-18:0/18:1)	10.3367	-0.0162195	21.7616	0.0503771	0.172531	10.1956	-1.24247	22.9584	0.0823922	0.240647	7.80985	-5.81486	23.4055	0.274778	0.577992	0.442654	-0.204841	1.09435	0.180341	0.515824
434	PE(P-18:0/18:2)	7.9026	-3.0686	20.1156	0.164104	0.373579	1.43749	-9.96664	14.2861	0.814259	0.910795	9.7467	-5.25937	27.1296	0.214611	0.50489	0.0687183	-0.633105	0.775499	0.848048	0.959633
435	PE(P-18:0/18:3)	-4.40152	-14.508	6.89974	0.429135	0.65513	1.22975	-10.6005	14.6255	0.846902	0.925823	10.581	-5.12756	28.8905	0.19781	0.489589	-0.191399	-0.920726	0.543297	0.608116	0.857671
436	PE(P-18:0/20:3) (a)	1.85227	-6.1133	10.4937	0.658193	0.821756	-2.3873	-10.8401	6.86689	0.600527	0.801393	2.38991	-8.42836	14.4863	0.678003	0.870272	-0.0382473	-0.571143	0.497504	0.888267	0.965127
437	PE(P-18:0/20:3) (b)	2.44413	-6.30901	12.015	0.595626	0.784038	-5.4882	-14.4259	4.38298	0.264905	0.505016	0.065181	-11.4694	13.1025	0.991666	0.997601	0.159023	-0.426445	0.747934	0.594705	0.852113
438	PE(P-18:0/20:4)	0.376346	-7.54398	8.97517	0.928509	0.96763	1.29785	-7.55214	10.9951	0.781857	0.904255	-2.49067	-12.884	9.14258	0.66045	0.85624	0.0801717	-0.458313	0.621569	0.77059	0.929029
439	PE(P-18:0/20:5)	7.17963	-4.33404	20.079	0.231293	0.466199	-2.49222	-14.0702	10.6457	0.695093	0.859099	13.6052	-2.78777	32.7625	0.108445	0.365973	-0.24887	-0.990185	0.497996	0.512033	0.792422
440	PE(P-18:0/22:4)	5.64446	-4.20218	16.5032	0.270811	0.513744	9.87199	-1.45697	22.5034	0.0898252	0.253118	-1.18124	-13.588	13.0069	0.861962	0.957457	0.318181	-0.324001	0.964501	0.331686	0.672723
441	PE(P-18:0/22:5) (n3)	6.03214	-3.72283	16.7755	0.233763	0.469955	-0.958138	-11.0391	10.2651	0.860238	0.927522	9.19037	-4.34452	24.6404	0.192462	0.482089	0.0929473	-0.539121	0.729033	0.773423	0.930994
442	PE(P-18:0/22:5) (n6)	1.98237	-5.73511	10.3317	0.624367	0.79893	6.17273	-2.72496	15.8843	0.179449	0.394386	0.803262	-9.50757	12.2889	0.884271	0.964328	0.04126	-0.474138	0.559327	0.875413	0.965127
443	PE(P-18:0/22:6)	5.07857	-1.4396	12.0278	0.129228	0.319107	1.07874	-5.87044	8.54095	0.767445	0.898642	4.7755	-4.03271	14.3922	0.297209	0.601594	-0.159827	-0.578615	0.260726	0.455137	0.764447
444	PE(P-18:1/18:1)	8.24349	-0.775643	18.0824	0.0742547	0.218238	8.99428	-1.05846	20.0684	0.0809802	0.23943	9.98461	-2.38386	23.9202	0.1177	0.374897	0.325398	-0.245881	0.899949	0.264316	0.623142
445	PE(P-18:1/18:1) (a)	8.36164	-0.763892	18.3263	0.0735171	0.218238	9.51197	-0.695976	20.7692	0.0686865	0.213507	10.1041	-2.40804	24.2204	0.117617	0.374897	0.324239	-0.2534	0.905224	0.271332	0.628776
446	PE(P-18:1/18:1) (b)	7.36506	-2.0259	17.6561	0.127836	0.319107	4.6474	-5.48204	15.8624	0.3812	0.642809	8.57367	-4.2331	23.0931	0.198537	0.489589	0.315468	-0.28542	0.919978	0.303604	0.656394
447	PE(P-18:1/18:2) (a)	4.39103	-6.01697	15.9516	0.42196	0.647975	0.623755	-10.4705	13.0927	0.916775	0.964109	9.89685	-4.84363	26.9207	0.198619	0.489589	-0.0502246	-0.736907	0.641208	0.886245	0.965127
448	PE(P-18:1/18:2) (b)	12.138	-2.5063	28.982	0.10842	0.292394	-6.20779	-19.7273	9.58868	0.419037	0.667355	13.6044	-6.23166	37.6366	0.192244	0.482089	-0.0915479	-1.00507	0.830402	0.84481	0.958704
449	PE(P-18:1/18:3)	11.4985	-4.08129	29.6089	0.15606	0.362734	10.9151	-6.18181	31.1277	0.224712	0.457702	2.49518	-16.6182	25.9899	0.814653	0.938306	0.16779	-0.816924	1.16228	0.739036	0.916689
450	PE(P-18:1/20:3) (a)	3.58519	-4.08444	11.8681	0.368855	0.601039	-1.29716	-9.39114	7.51985	0.764511	0.898642	2.07232	-8.14628	13.4277	0.702673	0.880046	-0.166759	-0.669579	0.338606	0.516478	0.794998
451	PE(P-18:1/20:3) (b)	4.22857	-6.34695	15.9983	0.447394	0.669793	1.68548	-9.72281	14.5354	0.782753	0.904255	-0.224875	-13.8396	15.5412	0.975967	0.987449	0.189918	-0.511213	0.895989	0.595871	0.852113
452	PE(P-18:1/20:4) (a)	-0.388535	-7.21432	6.93939	0.914263	0.961467	-0.309102	-7.87736	7.88091	0.938642	0.972569	2.8662	-6.67466	13.3824	0.568767	0.807754	0.0104585	-0.454441	0.477529	0.964854	0.998919
453	PE(P-18:1/20:4) (b)	0.973248	-7.78275	10.5606	0.833969	0.924706	-1.54291	-10.9917	8.90893	0.76223	0.89797	4.04693	-8.12224	17.8279	0.531284	0.775875	0.14276	-0.451716	0.740785	0.638116	0.87082
454	PE(P-18:1/20:5) (a)	10.2375	-3.06657	25.3675	0.137184	0.332815	-2.83914	-15.7897	12.103	0.692662	0.859099	15.2666	-3.36998	37.4976	0.114132	0.369617	-0.190793	-1.02983	0.655356	0.656988	0.879988
455	PE(P-18:1/20:5) (b)	9.50103	-10.4007	33.8233	0.37453	0.605956	-12.2595	-29.8048	9.6713	0.250066	0.486309	13.2386	-13.9916	49.0899	0.375037	0.662736	-0.874747	-2.1713	0.438986	0.190504	0.525646
456	PE(P-18:1/22:4)	3.48853	-3.56719	11.0605	0.340612	0.579415	7.12126	-0.970273	15.8739	0.0859231	0.245611	4.10077	-5.50659	14.6849	0.415308	0.688326	0.170093	-0.293123	0.635461	0.471734	0.780803
457	PE(P-18:1/22:5) (a)	6.95297	-2.10629	16.8506	0.136336	0.332314	-3.18842	-12.2647	6.82684	0.518223	0.755888	13.4927	0.521749	28.1373	0.040982	0.238496	0.0761905	-0.503513	0.659272	0.796899	0.945344
458	PE(P-18:1/22:5) (b)	1.93072	-5.96987	10.4951	0.641724	0.814259	4.09268	-4.84123	13.8654	0.380351	0.642776	2.81526	-7.95251	14.8427	0.622275	0.837636	0.041299	-0.487079	0.572483	0.878343	0.965127
459	PE(P-18:1/22:6) (a)	4.07396	-1.95319	10.4716	0.189151	0.411922	-0.00196573	-6.42187	6.85837	0.999536	0.999536	5.60856	-2.68671	14.6109	0.19066	0.480688	-0.153353	-0.543567	0.238391	0.441756	0.754789
460	PE(P-18:1/22:6) (b)	6.59933	-1.56405	15.4397	0.115702	0.305643	-2.5803	-10.8417	6.44659	0.562549	0.778913	8.81259	-2.44867	21.3738	0.129471	0.395178	-0.220974	-0.741406	0.302187	0.406416	0.733639
461	PE(P-19:0/20:4) (a)	-3.75847	-11.4308	4.57847	0.365485	0.599334	-16.6337	-23.9917	-8.56325	0.000122575	0.00227725	-7.02226	-17.0331	4.19647	0.209875	0.499747	-0.156928	-0.699894	0.389006	0.571848	0.834298
462	PE(P-19:0/20:4) (b)	-6.88602	-14.0742	0.903447	0.0816573	0.234955	-16.5858	-23.7162	-8.78884	7.56763e-05	0.00154141	-7.28604	-16.9574	3.51166	0.177954	0.467291	-0.499846	-1.02317	0.0262429	0.0624996	0.32908
463	PE(P-20:0/18:1)	2.7432	-3.6071	9.51187	0.405135	0.636054	-0.96067	-7.74516	6.32276	0.789434	0.90799	-0.50295	-8.8376	8.5937	0.909915	0.968297	0.378643	-0.0408392	0.799885	0.0768399	0.345409
464	PE(P-20:0/18:2)	2.12214	-7.52824	12.7797	0.677944	0.826008	-9.99706	-19.4053	0.509489	0.0614804	0.195024	6.2636	-7.25954	21.7587	0.381072	0.66882	0.179516	-0.471101	0.834387	0.588971	0.849935
465	PE(P-20:0/20:4)	-7.90304	-15.3877	0.243695	0.0569286	0.186707	-7.24637	-15.5914	1.92368	0.117637	0.300577	-13.9869	-23.4251	-3.38552	0.0111508	0.130769	0.0412115	-0.513839	0.599359	0.884406	0.965127
466	PE(P-20:0/22:6)	-1.40433	-7.54008	5.1386	0.665677	0.821756	-12.2018	-18.2573	-5.69765	0.000377278	0.00540765	-3.90508	-12.0093	4.94554	0.374926	0.662736	-0.17797	-0.598074	0.24391	0.407143	0.733639
467	PE(P-20:1/20:4)	-3.85843	-11.0096	3.86736	0.317799	0.561458	-13.49	-20.6165	-5.7237	0.000988255	0.0119517	-3.45056	-13.1599	7.3444	0.515493	0.772349	0.10689	-0.399705	0.616063	0.679338	0.888832
468	PE(P-20:1/22:6)	4.04125	-3.08584	11.6925	0.273316	0.515967	-10.6169	-17.4005	-3.27624	0.00539374	0.0397595	1.67775	-7.74996	12.0689	0.737123	0.889043	0.0290021	-0.435833	0.496007	0.902726	0.977216
469	LPE(16:0) [sn1]	6.20113	0.723778	11.9763	0.026025	0.110654	1.9601	-3.87164	8.14564	0.517691	0.755888	7.49905	-0.0299233	15.595	0.0509487	0.25997	0.324576	-0.0235221	0.673885	0.0675949	0.343534
470	LPE(16:0) [sn2]	8.59927	2.92663	14.5845	0.00263713	0.0217142	3.22214	-2.75703	9.56896	0.297002	0.544647	8.36989	0.683878	16.6426	0.0322844	0.214579	0.182081	-0.170079	0.535483	0.310711	0.661655
471	LPE(17:0) [sn1]	5.55251	-1.2443	12.8171	0.111352	0.298224	7.63504	-0.0455132	15.9058	0.0514209	0.17456	8.33382	-1.11591	18.6866	0.0855003	0.333563	-0.273322	-0.708064	0.163324	0.219043	0.572767
472	LPE(17:0) [sn2]	5.69973	0.512059	11.1552	0.0309175	0.121623	-0.10581	-5.54368	5.64512	0.970381	0.990864	4.20883	-2.73982	11.6539	0.241131	0.541651	-0.223842	-0.552883	0.106287	0.183248	0.515824
473	LPE(18:0) [sn1]	6.51124	0.75382	12.5977	0.0261624	0.110654	-0.10941	-6.09658	6.25949	0.972263	0.991478	5.77174	-1.98868	14.1466	0.148633	0.428699	0.346407	-0.0189458	0.713095	0.0631039	0.330016
474	LPE(18:0) [sn2]	5.18142	-0.610091	11.3104	0.0803306	0.232	0.903464	-5.25678	7.46425	0.779258	0.904255	6.44369	-1.51007	15.0398	0.114826	0.370313	0.278021	-0.0940714	0.6515	0.14297	0.488854
475	LPE(18:1) [sn1]	0.829775	-5.26565	7.3174	0.794748	0.908618	-4.84147	-11.2177	1.99272	0.160469	0.367464	0.415969	-7.81341	9.37997	0.924072	0.968297	0.258413	-0.151109	0.669614	0.216071	0.572767
476	LPE(18:1) [sn2]	0.0666814	-5.94331	6.4607	0.983144	0.987422	-5.94617	-12.2076	0.761827	0.0810474	0.23943	0.950223	-7.26981	9.89892	0.826965	0.943041	0.221616	-0.185017	0.629906	0.28533	0.641992
477	LPE(18:2) [sn1]	-2.71831	-10.563	5.81441	0.519966	0.721244	-1.21869	-10.0374	8.46446	0.796864	0.908211	-7.47648	-17.5514	3.82961	0.186087	0.480104	0.124092	-0.426933	0.678166	0.659119	0.879988
478	LPE(18:2) [sn2]	-3.39221	-11.3462	5.27537	0.430508	0.655581	-2.44954	-11.3404	7.33289	0.610464	0.80769	-8.39231	-18.5737	3.06217	0.144494	0.42203	0.119494	-0.443558	0.68573	0.677644	0.888832
479	LPE(20:4) [sn1]	-2.28947	-9.86091	5.91795	0.572983	0.7636	-0.136376	-8.70502	9.23649	0.976175	0.993096	-9.14469	-18.6574	1.48045	0.0890901	0.334737	-0.1028	-0.630269	0.427468	0.702922	0.899695
480	LPE(20:4) [sn2]	-2.79451	-10.2828	5.31879	0.48771	0.701365	-1.3957	-9.80706	7.80011	0.756979	0.894506	-9.97857	-19.3497	0.481407	0.0608483	0.288936	-0.126861	-0.651002	0.400045	0.63581	0.870418
481	LPE(22:6) [sn1]	0.338507	-7.77197	9.16222	0.937262	0.971557	-2.88529	-11.5758	6.65935	0.539875	0.767434	-9.45309	-19.336	1.64067	0.0920441	0.339248	-0.108593	-0.659703	0.445575	0.699846	0.899695
482	LPE(22:6) [sn2]	-0.826614	-8.95037	8.02197	0.848789	0.930567	-4.00196	-12.7071	5.57134	0.399102	0.647599	-10.6711	-20.5496	0.435781	0.0590977	0.28411	-0.0992115	-0.658065	0.462786	0.728329	0.912179
483	LPE(P-16:0)	0.726794	-7.30423	9.45362	0.864146	0.934644	5.15696	-4.12573	15.3384	0.28568	0.531689	-6.61114	-16.6676	4.65896	0.238858	0.540898	0.156986	-0.387768	0.704719	0.572367	0.834298
484	LPE(P-18:0)	3.0602	-4.41745	11.1228	0.432205	0.655935	2.75499	-5.50294	11.7346	0.524301	0.759942	-4.29099	-13.683	6.12296	0.404639	0.682546	0.0831891	-0.41041	0.579235	0.741272	0.917991
485	LPE(P-18:1)	2.80374	-6.51261	13.0485	0.56775	0.760275	3.24736	-7.10512	14.7535	0.552721	0.769435	-0.429227	-12.5902	13.4236	0.948311	0.973201	0.356429	-0.267381	0.98414	0.26288	0.623142
486	LPE(P-20:0)	-2.39537	-8.00076	3.55156	0.421084	0.647975	-0.0816191	-6.44313	6.71245	0.98056	0.996002	-6.84426	-14.1011	1.02563	0.0865244	0.333721	0.319259	-0.0694426	0.709472	0.107374	0.41323
487	PI (38:5) (b)	6.86292	1.17759	12.8677	0.0174143	0.0842419	-3.81703	-9.49133	2.21301	0.209247	0.434202	4.97045	-2.61095	13.142	0.204275	0.498194	-0.0407087	-0.398763	0.318632	0.823729	0.957607
488	PI(15-MHDA_20:4)\PI(17:0_20:4)	5.96337	0.641608	11.5665	0.027645	0.112459	-14.2569	-19.0329	-9.19925	1.9079e-07	8.68654e-06	-0.340447	-7.13906	6.95591	0.924511	0.968297	-0.108372	-0.445654	0.230054	0.529173	0.804675
489	PI(16:0_16:1)	8.49449	0.673915	16.9226	0.0327387	0.126069	-12.367	-19.3639	-4.763	0.00192351	0.0190872	9.32458	-1.33453	21.1352	0.0883887	0.333721	0.372842	-0.11884	0.866944	0.137176	0.478263
490	PI(16:0_20:3) (a)	4.74963	-1.09391	10.9384	0.1129	0.300404	-4.23608	-10.1591	2.07748	0.183544	0.399054	4.79699	-3.13553	13.3791	0.242833	0.541651	0.137919	-0.238671	0.51593	0.472783	0.780803
491	PI(16:0_20:3) (b)	3.38009	-5.45126	13.0363	0.464989	0.688889	0.0298806	-9.42776	10.4751	0.995288	0.998747	5.15385	-6.96488	18.8512	0.420535	0.694017	-0.00231064	-0.586714	0.585529	0.993825	0.999552
492	PI(16:0_20:4)	4.98937	-0.462931	10.7403	0.0734672	0.218238	-6.18925	-11.5919	-0.456472	0.0348076	0.132064	2.17231	-5.03259	9.92381	0.564038	0.803084	0.12564	-0.224231	0.476737	0.481405	0.782417
493	PI(16:0/16:0)	9.02772	-0.574422	19.5572	0.0660836	0.20877	-15.958	-24.1487	-6.88276	0.000923378	0.0114886	9.31242	-3.66886	24.043	0.167097	0.452214	0.332005	-0.27331	0.940995	0.282479	0.64117
494	PI(17:0_18:1)	7.48217	-1.54058	17.3318	0.106579	0.289447	-22.1357	-29.3708	-14.1595	6.24367e-07	2.54347e-05	10.2459	-2.24324	24.3306	0.111609	0.368931	0.145509	-0.429195	0.72353	0.619941	0.861445
495	PI(17:0_18:2)	5.97762	-2.60505	15.3166	0.177484	0.394749	-17.864	-25.2281	-9.77461	4.43194e-05	0.000980091	6.11312	-5.49058	19.1415	0.314687	0.621346	0.297069	-0.25738	0.854601	0.293716	0.649685
496	PI(18:0_18:1)	11.5411	0.690788	23.5606	0.0364982	0.133933	-10.7586	-20.3598	0.000215537	0.0500043	0.170499	17.5077	2.12247	35.2107	0.0243146	0.186341	0.286304	-0.385097	0.962231	0.403554	0.733217
497	PI(18:0_20:2)	9.84843	0.609785	19.9354	0.0361618	0.13392	1.61755	-7.84222	12.0483	0.747175	0.891371	9.89234	-2.57967	23.9611	0.124608	0.388897	-0.212409	-0.786176	0.364676	0.469222	0.779352
498	PI(18:0_20:3) (a)	4.84575	-2.36034	12.5837	0.192344	0.411922	-6.05624	-13.2096	1.68667	0.121864	0.308244	2.32773	-7.19137	12.8232	0.643646	0.851582	0.0585211	-0.40805	0.527278	0.805893	0.945344
499	PI(18:0_20:3) (b)	7.22487	-2.58348	18.0208	0.153781	0.359598	3.77757	-6.72535	15.4632	0.495186	0.727545	3.6623	-9.11526	18.2363	0.591462	0.821738	-0.0688968	-0.696172	0.562341	0.829869	0.957607
500	PI(18:0_20:4)	8.26973	3.67041	13.0731	0.000351741	0.00472351	-4.28619	-8.79764	0.448433	0.075265	0.227346	3.06367	-2.89208	9.38469	0.319812	0.623747	0.193932	-0.0911432	0.479822	0.182238	0.515824
501	PI(18:0_22:4)	9.66592	3.66617	16.0129	0.00134852	0.0128859	-0.943223	-6.9521	5.4537	0.766242	0.898642	4.67893	-3.09336	13.0746	0.244859	0.544601	0.0181893	-0.350498	0.38824	0.922978	0.986356
502	PI(18:0_22:5) (n3)	11.8565	3.78996	20.55	0.00340986	0.02618	-9.78731	-16.9934	-1.95564	0.0153992	0.0764039	9.25618	-1.40097	21.0652	0.0907908	0.336746	0.187939	-0.303065	0.681362	0.453186	0.764447
503	PI(18:0_22:5) (n6)	8.08915	-0.541126	17.4683	0.0668711	0.209548	6.07987	-3.29753	16.3666	0.210899	0.436459	2.05305	-8.95182	14.3881	0.726613	0.889043	-0.375175	-0.917835	0.170457	0.177024	0.515824
504	PI(18:0_22:6)	10.3021	4.12865	16.8415	0.000879613	0.00907761	-6.55113	-12.3499	-0.368783	0.0382094	0.140776	2.51143	-5.2732	10.9358	0.537587	0.781557	-0.175546	-0.552219	0.202553	0.36173	0.698201
505	PI(18:1_18:2)	6.63104	-0.211435	13.9427	0.0577478	0.187016	-6.28718	-12.9512	0.887009	0.0843548	0.243607	10.4064	0.808823	20.9177	0.03293	0.215036	0.545227	0.108484	0.983876	0.0144492	0.151371
506	PI(20:0_20:4)	4.91872	-1.0423	11.2388	0.107455	0.290804	-12.2412	-17.769	-6.34176	9.05919e-05	0.0017979	-1.77465	-9.3455	6.42845	0.661223	0.85624	-0.080379	-0.463278	0.303993	0.680978	0.888832
507	PI(34:0)	13.7043	3.25478	25.2112	0.00911071	0.0534219	-12.7875	-21.6548	-2.91655	0.0124734	0.0684931	9.63899	-3.93704	25.1337	0.172075	0.460723	0.220306	-0.411849	0.856475	0.494846	0.789714
508	PI(34:1)	10.5181	2.67197	18.9638	0.00785752	0.0474808	-12.8614	-19.7141	-5.42367	0.00102133	0.0121617	13.9439	2.99987	26.0507	0.0113769	0.130789	0.289452	-0.19414	0.775387	0.240707	0.59757
509	PI(36:2)	11.7755	3.07039	21.2159	0.00720681	0.0439218	-8.45772	-16.3519	0.181472	0.0547715	0.182028	13.6811	1.71925	27.0497	0.0238677	0.186341	0.494909	-0.0385044	1.03117	0.0689804	0.344457
510	PI(37:6)	0.521446	-6.59585	8.18107	0.889421	0.947369	-4.22723	-11.7389	3.92375	0.299434	0.546608	-2.68065	-12.0032	7.62955	0.596332	0.824216	-0.565606	-1.04374	-0.0851564	0.0211707	0.188346
511	PI(38:5) (a)	4.02234	-2.19164	10.6311	0.209101	0.432738	-2.76687	-9.20527	4.1281	0.421511	0.669917	2.52343	-5.78034	11.559	0.562479	0.803084	0.122554	-0.28143	0.528174	0.552093	0.824867
512	PI(38:6)	6.04516	-0.106041	12.5751	0.0541949	0.179323	-8.50324	-14.3868	-2.21536	0.00886431	0.0562375	1.36833	-6.60656	10.0242	0.744729	0.895062	0.0279753	-0.363594	0.421084	0.88866	0.965127
513	PI(39:6)	6.73042	-0.255573	14.2057	0.0592812	0.191182	-14.8751	-21.0492	-8.21821	3.07122e-05	0.000720341	1.61437	-7.39355	11.4985	0.734852	0.889043	-0.364164	-0.805904	0.079543	0.107376	0.41323
514	PIP1(38:4)	1.79476	-5.46877	9.61641	0.637147	0.81146	-4.21765	-11.7883	4.00273	0.304439	0.55184	2.13323	-7.72555	13.0453	0.683135	0.871516	-0.061444	-0.545879	0.425351	0.803891	0.945344
515	LPI(18:0) [sn1]	10.9813	2.95186	19.6369	0.00662549	0.041629	7.12813	-1.45679	16.461	0.105992	0.280952	6.9812	-3.48745	18.5854	0.198596	0.489589	0.129793	-0.362577	0.624596	0.605498	0.857671
516	LPI(18:0) [sn2]	9.5888	-0.83169	21.1043	0.072398	0.218238	7.03957	-4.2189	19.6214	0.229756	0.463717	1.608	-11.4017	16.5281	0.819205	0.942146	0.240005	-0.415256	0.899578	0.473122	0.780803
517	LPI(18:1) [sn1]	0.284524	-6.75313	7.85333	0.938895	0.971557	-10.7981	-17.7327	-3.27893	0.00572885	0.0413212	-5.81203	-14.7558	4.07014	0.239001	0.540898	0.235516	-0.242059	0.715377	0.333754	0.672723
518	LPI(18:1) [sn2]	3.90516	-6.26635	15.1804	0.465489	0.688889	-13.5645	-22.9224	-3.07043	0.0127429	0.0684931	-18.211	-28.9861	-5.80096	0.00536197	0.0830033	-0.00666808	-0.680558	0.671794	0.984555	0.999552
519	LPI(18:2) [sn1]	2.5074	-4.17897	9.66033	0.471153	0.692092	-16.6959	-22.7171	-10.2056	2.1963e-06	8.49967e-05	-11.1939	-19.0395	-2.58798	0.0119732	0.133013	-0.0110093	-0.452732	0.432673	0.961064	0.998475
520	LPI(18:2) [sn2]	0.654735	-6.23424	8.04984	0.856597	0.933828	-15.7813	-22.1673	-8.87135	2.20318e-05	0.000554969	-10.6864	-18.9604	-1.56764	0.0227735	0.181774	0.0161994	-0.448148	0.482713	0.94552	0.99569
521	LPI(20:4) [sn1]	3.00738	-2.49932	8.8251	0.289938	0.537435	-9.64575	-15.0019	-3.9521	0.00117861	0.0132387	-12.211	-18.5818	-5.34168	0.000732216	0.0298282	-0.225973	-0.585137	0.134488	0.218418	0.572767
522	LPI(20:4) [sn2]	2.19771	-3.58449	8.32668	0.463807	0.688889	-8.47451	-14.2156	-2.34919	0.00746351	0.0502327	-13.0931	-19.7639	-5.86768	0.000598476	0.0257345	-0.0192952	-0.400785	0.363656	0.921063	0.986356
523	PS(36:1)	1.20625	-11.9539	16.3335	0.865814	0.934644	-6.01276	-19.5029	9.73812	0.432149	0.682619	-11.8458	-27.174	6.70856	0.195352	0.487749	0.665122	-0.25111	1.58977	0.154992	0.505159
524	PS(36:2)	2.81933	-11.785	19.8415	0.721639	0.863302	5.47063	-11.0532	25.0642	0.53951	0.767434	3.20915	-16.3461	27.3357	0.767854	0.907357	0.660522	-0.34661	1.67783	0.199001	0.544264
525	PS(38:3)	-0.389125	-15.211	17.0237	0.962107	0.975977	8.51717	-9.28543	29.8135	0.37068	0.630563	4.11881	-16.519	29.8586	0.719846	0.886702	0.72002	-0.339452	1.79076	0.183218	0.515824
526	PS(38:4)	0.956647	-12.7716	16.8455	0.898244	0.949782	11.7792	-4.99246	31.5117	0.17905	0.394386	-2.95201	-20.5774	18.5848	0.769143	0.907495	0.652939	-0.308092	1.62323	0.183271	0.515824
527	PS(38:5)	5.84308	-4.20636	16.9468	0.264033	0.507101	14.8315	2.77126	28.3071	0.0146625	0.0745483	5.32748	-8.13891	20.768	0.456452	0.728441	0.369466	-0.285625	1.02886	0.269134	0.627752
528	PS(40:5)	9.09558	-7.92406	29.2612	0.313848	0.555878	8.68336	-10.002	31.2481	0.386355	0.643351	13.7525	-9.85244	43.5383	0.276988	0.580999	0.751965	-0.363486	1.8799	0.186815	0.523893
529	PS(40:6)	12.5457	-4.2753	32.3224	0.152132	0.356988	17.0732	-2.21768	40.1698	0.0860708	0.245611	13.9247	-8.75417	42.2402	0.249196	0.549973	0.842984	-0.222874	1.92023	0.121296	0.444945
530	PG(34:1)	21.4911	7.37348	37.4649	0.00206081	0.0175282	3.22396	-10.0273	18.4269	0.650298	0.832003	40.1245	18.2907	65.9883	0.000102371	0.00571888	0.844121	0.0297641	1.66511	0.0421888	0.264756
531	PG(36:1)	24.012	10.9084	38.6639	0.000169573	0.00293662	-1.1045	-12.6561	11.9749	0.860658	0.927522	29.5024	11.1151	50.9323	0.000970197	0.0357809	1.01935	0.281568	1.76255	0.00677422	0.0890661
532	PG(36:2)	18.0741	6.92739	30.3827	0.00105954	0.0106504	4.67233	-6.25851	16.8778	0.41646	0.665107	35.648	18.4023	55.4056	1.26363e-05	0.00165743	0.730961	0.0774466	1.38874	0.0283663	0.208701
533	CE(14:0)	-3.45336	-8.81274	2.22101	0.227311	0.459563	5.27365	-1.2056	12.1778	0.1126	0.293443	-7.70469	-14.6568	-0.186211	0.0448079	0.244733	-0.494013	-0.866331	-0.120296	0.00970513	0.113815
534	CE(15:0)	-5.29708	-11.6039	1.45974	0.121436	0.31123	-5.07339	-12.078	2.48926	0.182712	0.398365	-7.57666	-15.9109	1.58357	0.102066	0.357147	-0.623757	-1.07228	-0.173198	0.00678928	0.0890661
535	CE(16:0)	-0.45055	-4.89103	4.19724	0.845962	0.930567	1.386	-3.63131	6.66453	0.594473	0.797438	-0.0250266	-6.0889	6.43039	0.993734	0.997601	-0.0555136	-0.354416	0.244285	0.7159	0.905044
536	CE(16:1)	-2.29399	-9.50597	5.49276	0.552467	0.75151	2.74216	-5.65716	11.8893	0.533548	0.764753	-1.61168	-11.4315	9.29687	0.761618	0.90413	-0.304634	-0.805151	0.198409	0.234311	0.590157
537	CE(16:2)	-11.3959	-19.1489	-2.89945	0.00969268	0.0551628	8.80939	-1.72698	20.4754	0.104045	0.2805	-10.6453	-21.1891	1.30911	0.0788313	0.325878	-0.911416	-1.5052	-0.314057	0.00288913	0.0527379
538	CE(17:0)	0.216197	-8.27787	9.49687	0.961819	0.975977	-11.936	-20.1975	-2.81929	0.0115296	0.0656169	-4.24378	-15.1945	8.12101	0.4834	0.749863	-0.489815	-1.06662	0.0903575	0.0976739	0.409443
539	CE(17:1)	-3.77174	-11.3767	4.4858	0.35942	0.596174	-4.01444	-12.4134	5.18997	0.37988	0.642776	-5.18195	-15.304	6.14983	0.354974	0.64647	-0.454966	-0.991447	0.0844214	0.0979896	0.409443
540	CE(18:0)	2.5607	-6.04471	11.9543	0.571165	0.763527	4.14072	-5.53122	14.8029	0.41397	0.66338	-2.44922	-13.4949	10.0069	0.685424	0.871516	-0.216656	-0.788991	0.35898	0.459272	0.767769
541	CE(18:1)	2.23686	-3.70512	8.54551	0.468361	0.691816	1.26019	-5.26397	8.23364	0.712031	0.870635	1.81459	-6.21102	10.527	0.667233	0.862075	0.0285014	-0.363864	0.422412	0.886808	0.965127
542	CE(18:2)	1.48824	-4.69991	8.0782	0.644841	0.814927	-0.105316	-6.85644	7.13514	0.976416	0.993096	3.33007	-5.2103	12.6399	0.456093	0.728441	0.159387	-0.253364	0.573847	0.44908	0.763929
543	CE(18:3)	-6.43236	-14.1488	1.97765	0.129771	0.319107	6.66697	-3.07083	17.3831	0.185977	0.40172	-5.51254	-16.0312	6.32373	0.345761	0.638708	-0.464477	-1.02521	0.0994349	0.106092	0.41323
544	CE(20:0)	1.48941	-6.92221	10.6612	0.737287	0.869909	1.44944	-7.85816	11.6972	0.769094	0.899213	-1.0591	-12.1277	11.4037	0.860146	0.957457	-0.407613	-0.971593	0.159578	0.158313	0.505159
545	CE(20:1)	-2.62677	-11.4552	7.08188	0.582483	0.770968	2.25949	-7.99878	13.6616	0.678209	0.852981	-1.07016	-13.1585	12.7009	0.87125	0.959297	-0.209717	-0.830316	0.414765	0.508916	0.792422
546	CE(20:2)	-0.925372	-7.90381	6.58185	0.802685	0.912303	4.12285	-4.00153	12.9348	0.329107	0.575822	-1.20464	-10.6201	9.2027	0.812227	0.938306	-0.124511	-0.60219	0.355465	0.609971	0.857671
547	CE(20:3)	-2.67283	-8.2061	3.19399	0.363697	0.598939	1.11266	-5.26038	7.91442	0.738641	0.890468	-4.47242	-11.84	3.51091	0.26333	0.565571	-0.171641	-0.554444	0.212635	0.380205	0.717171
548	CE(20:4)	-13.405	-19.9435	-6.33234	0.000344457	0.00472351	2.82972	-5.76887	12.2129	0.530512	0.763832	-15.9233	-24.5045	-6.36672	0.00163582	0.0462469	-1.00242	-1.51128	-0.490941	0.000136568	0.013213
549	CE(20:5)	-13.8603	-24.5739	-1.62493	0.0277514	0.112459	1.0497	-12.8278	17.1365	0.889633	0.948452	-13.8214	-28.1704	3.39388	0.109232	0.365997	-1.18432	-2.04205	-0.31909	0.0074794	0.0949025
550	CE(22:0)	0.83332	-8.23418	10.7968	0.862736	0.934644	3.06779	-7.18763	14.4564	0.571447	0.785613	4.66803	-8.0189	19.1049	0.488283	0.749863	-0.310159	-0.924843	0.308339	0.324337	0.672723
551	CE(22:1)	-2.08037	-11.3977	8.21682	0.679802	0.826008	5.82562	-5.31286	18.2744	0.317755	0.562797	2.52962	-10.6071	17.5968	0.720589	0.886702	-0.358985	-1.01081	0.297127	0.282287	0.64117
552	CE(22:4)	-3.7347	-10.9744	4.0937	0.339393	0.578613	3.1829	-5.41084	12.5574	0.479437	0.71638	-2.47859	-12.3928	8.55754	0.645838	0.851582	-0.300217	-0.810551	0.212743	0.250329	0.609292
553	CE(22:5) (n3)	-2.63286	-9.55042	4.81376	0.477329	0.696231	-3.49799	-11.0927	4.74545	0.39393	0.644613	-7.40901	-16.3086	2.43691	0.135171	0.407126	-0.534461	-1.01445	-0.0521499	0.0299679	0.212815
554	CE(22:5) (n6)	-1.54998	-8.43332	5.8508	0.672245	0.823062	3.23304	-4.76279	11.9002	0.438555	0.687129	-3.44937	-12.584	6.63984	0.488174	0.749863	-0.235559	-0.70907	0.240209	0.330669	0.672723
555	CE(22:6)	-3.86108	-10.7378	3.54546	0.297833	0.544972	-3.53966	-11.1825	4.76082	0.391554	0.643446	-8.65228	-17.4912	1.13356	0.0812506	0.327887	-0.352232	-0.836482	0.134383	0.155387	0.505159
556	CE(24:0)	-0.587728	-8.14455	7.59079	0.883628	0.944652	2.22567	-6.3796	11.6219	0.623151	0.814734	-0.844504	-11.0317	10.5092	0.877943	0.962504	-0.22975	-0.746151	0.289338	0.384365	0.717746
557	CE(24:1)	-1.59781	-10.0353	7.63095	0.7243	0.863803	3.86437	-5.99225	14.7544	0.455457	0.699452	1.59015	-10.1608	14.8781	0.80108	0.934503	-0.259186	-0.844355	0.329437	0.386719	0.717746
558	CE(24:4)	-0.366208	-11.5215	12.1955	0.951633	0.973687	5.08687	-7.91463	19.924	0.460902	0.70086	-5.59596	-19.781	11.0974	0.487569	0.749863	-0.231478	-1.00605	0.549157	0.55946	0.824867
559	CE(24:5)	1.43961	-11.0619	15.6984	0.831057	0.924706	0.10166	-13.5213	15.8706	0.989121	0.998212	-12.0506	-26.5642	5.33144	0.162531	0.447684	-0.405591	-1.26169	0.457929	0.355556	0.690382
560	CE(24:6)	-6.06401	-14.9629	3.76608	0.21752	0.444222	3.46343	-7.37861	15.5746	0.546023	0.768404	-10.7346	-22.1223	2.31815	0.102751	0.357147	-0.716951	-1.36342	-0.0662402	0.0309266	0.217611
561	COH	1.68246	-3.01833	6.61111	0.489019	0.701365	1.64318	-3.56955	7.13769	0.543412	0.767434	3.33303	-3.16076	10.2623	0.321544	0.623747	0.0658379	-0.24457	0.377212	0.677519	0.888832
562	DE(16:0)	-2.10869	-7.38619	3.46955	0.45038	0.672962	2.76328	-3.37986	9.29701	0.385479	0.643351	-6.80811	-13.6277	0.549917	0.0689213	0.308353	-0.438454	-0.799967	-0.0756233	0.0179909	0.169817
563	DE(18:1)	-0.237824	-5.43207	5.24173	0.930337	0.96763	-2.58072	-8.20564	3.38889	0.388254	0.643351	-2.99762	-9.85547	4.38195	0.41527	0.688326	-0.190388	-0.54008	0.160533	0.286679	0.643159
564	DE(18:2)	-3.93984	-10.2471	2.81071	0.245545	0.482968	2.95682	-4.53394	11.0353	0.448979	0.699214	-9.81285	-17.8325	-1.01042	0.0297891	0.209607	-0.309274	-0.752689	0.136123	0.172871	0.515824
565	DE(20:4)	-13.3094	-20.5033	-5.46458	0.00127135	0.012496	2.83632	-6.61002	13.2381	0.568839	0.783419	-20.4684	-29.3764	-10.4369	0.000168528	0.00815252	-1.08874	-1.64958	-0.524706	0.000172089	0.0147997
566	DE(20:5)	-0.563145	-9.45	9.1959	0.905734	0.956396	-2.69639	-12.319	7.9822	0.606363	0.805017	-3.43739	-15.071	9.78984	0.592761	0.821738	-0.640127	-1.24883	-0.0276682	0.0405683	0.259503
567	DE(22:6)	-3.55808	-9.96577	3.30565	0.301114	0.547316	-6.11158	-13.0235	1.34961	0.105834	0.280952	-11.2582	-19.242	-2.48511	0.0131124	0.139656	-0.408916	-0.85733	0.041526	0.0750505	0.345409
568	FA(14:0)	-1.01092	-5.16461	3.3247	0.641729	0.814259	-17.2554	-21.108	-13.2147	2.78973e-14	2.15925e-12	-11.048	-16.1259	-5.66255	0.000102358	0.00571888	-0.199987	-0.480402	0.0812177	0.162842	0.506299
569	FA(15:0)	1.54046	-0.670863	3.80102	0.173218	0.390876	-0.217229	-2.63125	2.25664	0.861613	0.927522	0.967784	-2.03513	4.06275	0.531223	0.775875	-0.0717169	-0.216035	0.0728096	0.329994	0.672723
570	FA(16:0)	0.756401	-3.90283	5.64153	0.754703	0.879729	-20.3023	-24.3907	-15.9929	2.07012e-16	2.00284e-14	-10.09	-15.7417	-4.05917	0.00136384	0.0439839	-0.0498758	-0.36001	0.261223	0.752659	0.924695
571	FA(16:1)	7.40124	-1.7833	17.4447	0.11726	0.308115	-34.86	-41.0253	-28.0501	2.02174e-16	2.00284e-14	-11.9595	-22.1165	-0.477866	0.0417214	0.238513	-0.00614142	-0.591166	0.582326	0.983606	0.999552
572	FA(16:2)	2.14315	-0.194448	4.5355	0.0725487	0.218238	2.38318	-0.219577	5.05382	0.0729522	0.223182	0.253397	-2.87928	3.48712	0.875639	0.96134	-0.0419493	-0.193733	0.110065	0.587833	0.849935
573	FA(17:0)	1.26753	-0.989657	3.57618	0.272898	0.515967	-1.92409	-4.35248	0.565958	0.128568	0.319973	-2.04279	-5.02432	1.03234	0.190226	0.480688	-0.150995	-0.298622	-0.00314948	0.0453338	0.274128
574	FA(17:1)	0.367078	-2.68232	3.51203	0.815658	0.918951	-6.43464	-9.59107	-3.16801	0.000155768	0.00274009	-4.3732	-8.33456	-0.240656	0.038341	0.233669	-0.00742412	-0.209722	0.195284	0.942625	0.993995
575	FA(18:0)	0.386806	-1.32491	2.12821	0.659467	0.821756	2.59115	0.647352	4.5725	0.00885121	0.0562375	0.0993097	-2.23371	2.488	0.934146	0.9717	-0.00489483	-0.117712	0.10805	0.932161	0.991037
576	FA(18:1)	0.769989	-7.95181	10.3182	0.867892	0.935583	-43.1595	-48.6041	-37.1381	8.48533e-26	3.28382e-23	-21.8303	-30.9558	-11.4986	0.000108763	0.00571888	0.140364	-0.452921	0.737184	0.643101	0.87082
577	FA(18:2)	-11.9069	-20.1401	-2.82484	0.0114195	0.0618089	-47.9284	-53.3122	-41.9239	9.38988e-29	7.26777e-26	-33.8952	-42.217	-24.375	2.69896e-09	1.0445e-06	-0.257443	-0.897769	0.38702	0.432139	0.752333
578	FA(18:3)	-5.68417	-10.7169	-0.367786	0.0365113	0.133933	-27.4759	-31.7671	-22.9148	3.72385e-23	9.60755e-21	-16.8718	-22.8933	-10.3801	1.77365e-06	0.000343202	-0.180057	-0.538702	0.179881	0.325832	0.672723
579	FA(20:2)	1.05956	-1.63312	3.82596	0.443678	0.665517	-3.99602	-6.83687	-1.06855	0.00787699	0.0520166	-5.24947	-8.69406	-1.67492	0.00438902	0.0773964	-0.0141113	-0.191192	0.163284	0.875804	0.965127
580	FA(20:3)	-3.74161	-9.03012	1.85434	0.185551	0.408969	-18.6524	-23.6079	-13.3756	2.32328e-10	1.63474e-08	-15.6193	-21.9106	-8.82098	1.95908e-05	0.00189541	-0.155116	-0.524762	0.215904	0.411411	0.734727
581	FA(20:4)	-2.61037	-9.82589	5.18252	0.500031	0.708885	-18.6684	-25.3422	-11.3981	2.68359e-06	9.89096e-05	-18.8742	-27.001	-9.84278	0.000110831	0.00571888	-0.208284	-0.711229	0.297207	0.418005	0.740357
582	FA(20:5)	-1.20229	-5.13298	2.89126	0.55867	0.755625	-7.05304	-11.1568	-2.75975	0.00154392	0.0161486	-5.08116	-10.2209	0.352826	0.0663088	0.308353	-0.20659	-0.472166	0.0596957	0.128004	0.459731
583	FA(22:4)	1.28287	-3.46213	6.26109	0.60203	0.786054	-21.5915	-25.6663	-17.2933	4.57782e-18	7.08647e-16	-13.7055	-19.2005	-7.83688	1.28483e-05	0.00165743	-0.0150635	-0.329467	0.300332	0.925186	0.986356
584	FA(22:5)	-3.48247	-8.17981	1.45519	0.163451	0.373189	-20.7505	-25.0285	-16.2284	1.20149e-15	1.03328e-13	-19.4094	-24.7386	-13.7029	1.09775e-09	8.49662e-07	-0.200492	-0.526788	0.126875	0.22923	0.583632
585	FA(22:6)	-6.92936	-13.569	0.220349	0.0571897	0.186771	-31.1355	-36.5775	-25.2267	6.90631e-18	8.90914e-16	-24.3001	-31.6058	-16.214	1.03517e-07	2.67074e-05	-0.276189	-0.75948	0.209455	0.263975	0.623142
586	AC(12:0)	23.613	12.542	35.7731	1.08815e-05	0.00163669	-18.3607	-26.4513	-9.38019	0.000149027	0.00268249	2.26242	-10.0837	16.3037	0.732845	0.889043	0.534284	-0.0829854	1.15537	0.0897988	0.384002
587	AC(13:0)	6.31671	-4.24729	18.0462	0.250815	0.488994	-8.01152	-18.1194	3.34419	0.159369	0.367118	6.95785	-7.34067	23.4628	0.357647	0.646772	0.0700846	-0.614972	0.759863	0.841308	0.957607
588	AC(14:0)	23.0019	11.1163	36.1587	7.10761e-05	0.00187034	-17.8836	-26.6599	-8.05718	0.000660854	0.00897371	-0.685808	-13.6041	14.164	0.922765	0.968297	0.60907	-0.0597896	1.28241	0.0743055	0.345409
589	AC(14:1)	25.0359	13.4372	37.8205	7.91541e-06	0.00163669	-20.2297	-28.4161	-11.1072	4.72117e-05	0.00101505	7.78326	-5.68595	23.176	0.270593	0.574941	0.676559	0.0352865	1.32194	0.0386594	0.251448
590	AC(14:2)	11.5658	3.22432	20.5813	0.00585236	0.0378269	-14.8333	-21.8854	-7.14455	0.000287372	0.00427743	-3.36408	-13.1318	7.50199	0.528476	0.775875	0.369193	-0.141462	0.88246	0.156449	0.505159
591	AC(15:0) (a)	8.97763	0.652772	17.991	0.0340185	0.129706	-11.0486	-18.5733	-2.82859	0.00951273	0.0579752	1.23396	-9.21742	12.8886	0.825133	0.943041	-0.11766	-0.637292	0.40469	0.65772	0.879988
592	AC(15:0) (b)	16.6014	8.2906	25.5499	5.13467e-05	0.00175565	-14.3664	-21.1273	-7.02588	0.000232521	0.00391241	6.62873	-3.65265	18.0072	0.214277	0.50489	0.0617558	-0.422715	0.548584	0.802811	0.945344
593	AC(16:0)	15.9678	7.75164	24.8105	8.43353e-05	0.00203245	-1.86196	-9.56402	6.49606	0.651696	0.832364	6.96173	-3.29092	18.3013	0.190108	0.480688	0.323665	-0.159067	0.808731	0.188757	0.524735
594	AC(16:1)	29.2423	15.0238	45.2183	1.81034e-05	0.00163669	-25.4417	-34.5066	-15.122	1.03661e-05	0.000297163	6.7477	-9.01899	25.2467	0.422616	0.695968	0.94382	0.174533	1.71901	0.0161841	0.161328
595	AC(17:0) (a)	12.6263	5.1779	20.6021	0.000686479	0.0075905	-9.03145	-15.6975	-1.83825	0.0148661	0.0747169	4.19732	-5.13418	14.4467	0.38976	0.674121	0.176847	-0.27205	0.627764	0.44002	0.754479
596	AC(17:0) (b)	8.4794	2.29401	15.0388	0.0066661	0.041629	-1.99667	-8.19179	4.61649	0.544343	0.767434	4.4198	-3.65698	13.1737	0.291804	0.597504	0.300864	-0.0849101	0.688127	0.126289	0.456766
597	AC(18:0)	15.2805	6.70096	24.55	0.000330915	0.00472351	5.17503	-3.49397	14.6228	0.24979	0.486309	5.40521	-5.20067	17.1976	0.330006	0.627578	0.461734	-0.0469566	0.973013	0.0752173	0.345409
598	AC(18:1)	22.2755	9.45655	36.5958	0.000391397	0.00504903	-12.2789	-22.4455	-0.779468	0.0371577	0.138455	8.84813	-6.48803	26.6994	0.27332	0.577992	1.0808	0.348663	1.81828	0.00381826	0.0593896
599	AC(18:2)	7.44505	-4.5781	20.9831	0.235139	0.470437	-14.5384	-25.106	-2.47969	0.0197411	0.0863257	-9.03442	-22.6954	7.0406	0.253573	0.553227	0.778128	-0.00382518	1.5662	0.051132	0.288877
600	DG(14:0_16:0)	9.91246	3.76124	16.4284	0.00133813	0.0128859	-9.44667	-15.0654	-3.45628	0.00245121	0.0225861	6.16201	-1.89934	14.8858	0.137523	0.410721	0.126521	-0.251267	0.505739	0.511492	0.792422
601	DG(14:0_18:2)	19.979	9.13817	31.8966	0.000174528	0.00293662	-14.0374	-22.6315	-4.48869	0.0049594	0.0372677	12.3866	-1.29992	27.971	0.0778953	0.325401	0.666395	0.0425849	1.29409	0.0362846	0.242106
602	DG(16:0_16:0)	13.2262	6.15313	20.7707	0.000171425	0.00293662	-8.04038	-14.4071	-1.20014	0.0221119	0.0920142	11.2518	1.83398	21.5406	0.0182297	0.162181	0.362643	-0.0613975	0.788484	0.0936599	0.398312
603	DG(16:0_16:1)	18.7589	9.34175	28.987	4.97559e-05	0.00175565	-12.7113	-20.3749	-4.31019	0.00380255	0.0308023	10.9095	-0.969625	24.2135	0.0731532	0.316316	0.340454	-0.202204	0.886063	0.218839	0.572767
604	DG(16:0_18:1)	22.4677	11.6561	34.3261	1.93993e-05	0.00163669	-9.40218	-18.2528	0.406697	0.0597251	0.192613	22.4496	7.87409	38.9945	0.00178265	0.0462469	0.855643	0.245651	1.46935	0.0059908	0.0843069
605	DG(16:0_18:2)	22.7468	10.2936	36.606	0.0001849	0.00301813	-12.3393	-22.1731	-1.2629	0.0301191	0.11894	18.0021	1.90187	36.6461	0.0270564	0.198951	0.849176	0.143508	1.55982	0.0183484	0.171104
606	DG(16:0_20:4)	13.8619	1.93958	27.1786	0.0215074	0.098339	-10.3138	-20.6955	1.42701	0.0827696	0.240841	16.5639	0.160377	35.654	0.0476357	0.254276	0.0211147	-0.70241	0.749911	0.954474	0.997988
607	DG(16:0_22:5)	25.8135	10.9997	42.6044	0.000344944	0.00472351	-15.8979	-26.8366	-3.3237	0.0149628	0.0747173	21.7548	2.53758	44.5736	0.0247849	0.186341	0.432427	-0.390018	1.26166	0.30314	0.656394
608	DG(16:0_22:6)	17.625	3.56087	33.5992	0.0125619	0.066142	-5.98337	-18.3996	8.32209	0.392601	0.6438	7.0586	-10.0945	27.4843	0.4433	0.717812	-0.000319673	-0.832689	0.839036	0.999401	0.999552
609	DG(16:1_18:1)	19.0619	9.45473	29.5122	5.27857e-05	0.00175565	-11.661	-19.5525	-2.99535	0.00949391	0.0579752	20.0611	6.97932	34.7426	0.00194485	0.0485586	0.734965	0.180208	1.29279	0.00943788	0.112383
610	DG(18:0_18:1)	17.9595	8.77988	27.9137	7.02074e-05	0.00187034	-7.47666	-15.4493	1.24774	0.0908454	0.253118	16.3021	4.07382	29.9672	0.00779611	0.105863	0.801134	0.266527	1.33859	0.00333516	0.0573647
611	DG(18:0_18:2)	16.8428	6.31306	28.4154	0.00127543	0.012496	-8.75085	-17.8497	1.35573	0.0873823	0.247743	16.7179	2.54058	32.8554	0.0193846	0.170496	0.747636	0.125036	1.37411	0.0186051	0.171433
612	DG(18:0_20:4)	9.05048	-4.2859	24.2451	0.192581	0.411922	-2.27361	-15.472	12.9856	0.755666	0.89432	12.8958	-5.59502	35.0085	0.183435	0.478241	0.696918	-0.161592	1.56281	0.111687	0.415605
613	DG(18:0_22:6)	1.0329	-2.84511	5.06569	0.606297	0.786054	-1.65686	-5.84622	2.71891	0.4513	0.699409	3.86248	-1.56486	9.58906	0.166019	0.451723	-0.0799504	-0.336322	0.177081	0.541137	0.818047
614	DG(18:1_18:1)	19.7642	9.90516	30.5077	4.27337e-05	0.00175565	-8.21343	-16.5778	0.989556	0.0786552	0.235886	24.6766	10.8218	40.2635	0.000257453	0.0117217	0.88035	0.313104	1.4508	0.00236923	0.0482935
615	DG(18:1_18:2)	18.1242	7.66461	29.5999	0.000450735	0.0055376	-10.1047	-18.913	-0.339521	0.0429309	0.153127	20.6892	6.28068	37.0511	0.00381054	0.0737339	1.05634	0.443212	1.67322	0.000742571	0.0246873
616	DG(18:1_18:3)	13.8211	4.78622	23.6349	0.0022083	0.0185786	-10.6368	-18.4905	-2.02635	0.0166562	0.079819	14.7074	2.40914	28.4826	0.0178078	0.162181	0.49539	-0.0486861	1.04243	0.0743192	0.345409
617	DG(18:1_20:3)	11.8287	2.8	21.6505	0.00933134	0.0538553	-1.95545	-10.719	7.66834	0.678858	0.852981	20.3242	7.20618	35.0473	0.00172781	0.0462469	0.275506	-0.277055	0.831129	0.32853	0.672723
618	DG(18:1_20:4)	11.001	1.1801	21.7751	0.0272992	0.111797	-8.66267	-17.6051	1.25031	0.0846644	0.243607	15.8613	2.04011	31.5545	0.0231892	0.183147	0.00127145	-0.604946	0.611187	0.996725	0.999552
619	DG(18:1_20:5)	15.399	3.20294	29.0364	0.0120549	0.0643483	-9.76788	-20.3097	2.16848	0.104727	0.2805	18.452	1.63036	38.058	0.0303018	0.209779	-0.176356	-0.90556	0.558214	0.636507	0.870418
620	DG(18:1_22:5)	12.2408	2.96101	22.357	0.00881019	0.0520541	-1.7057	-10.7017	8.1966	0.724943	0.879477	13.6923	1.00424	27.9742	0.0335985	0.215778	0.148015	-0.417657	0.7169	0.608261	0.857671
621	DG(18:1_22:6)	14.322	1.99224	28.1423	0.021599	0.098339	0.0852944	-11.8457	13.631	0.989479	0.998212	11.1932	-4.91415	30.0291	0.183511	0.478241	0.0243585	-0.722107	0.776437	0.949105	0.997988
622	DG(18:2_18:2)	9.59327	-0.902767	21.201	0.0744378	0.218238	-13.2289	-22.4209	-2.94772	0.0130932	0.0694117	11.2559	-3.08988	27.7253	0.129684	0.395178	0.775036	0.111297	1.44317	0.0221069	0.192256
623	DG(18:2_20:4)	6.79802	-4.4797	19.4072	0.247562	0.485096	-9.84445	-20.3686	2.07064	0.101597	0.276605	7.7843	-7.50997	25.6076	0.336414	0.634072	-0.134732	-0.863602	0.599496	0.717872	0.905044
624	DG(18:2_22:6)	11.1521	-2.64945	26.9103	0.117832	0.308115	-2.44208	-15.8179	13.0591	0.742057	0.890468	5.73618	-11.8406	26.8173	0.547031	0.788458	-0.110587	-0.976094	0.762486	0.802894	0.945344
625	TG(48:0) [NL-16:0]	15.9005	4.60687	28.4133	0.00486134	0.033298	-7.61809	-17.5741	3.54049	0.17285	0.385433	7.54374	-6.56046	23.7769	0.310031	0.615292	0.808415	0.13231	1.48909	0.019108	0.173995
626	TG(48:0) [NL-18:0]	14.4194	5.05137	24.6227	0.00204778	0.0175282	-7.0451	-15.4702	2.21969	0.131535	0.3232	5.06332	-6.5496	18.1194	0.407897	0.682546	0.464153	-0.0975627	1.02903	0.105319	0.41323
627	TG(48:1) [NL-16:1]	24.7909	12.4573	38.477	3.36221e-05	0.00175565	-12.7487	-22.2852	-2.04189	0.0210082	0.0902136	12.4959	-2.46432	29.7507	0.105643	0.363411	0.35445	-0.328704	1.04229	0.309412	0.66156
628	TG(48:1) [NL-18:1]	18.7426	7.71326	30.9014	0.000577311	0.00677029	-14.9244	-23.6666	-5.18105	0.00354751	0.0293071	8.2956	-5.25509	23.7843	0.242118	0.541651	0.950246	0.306346	1.59828	0.00383654	0.0593896
629	TG(48:2) [NL-14:0]	28.0062	13.8688	43.8989	3.92155e-05	0.00175565	-16.7776	-26.9352	-5.20785	0.00576574	0.0413212	14.3202	-2.62937	34.2203	0.101976	0.357147	1.28001	0.504974	2.06101	0.00121229	0.0345461
630	TG(48:2) [NL-14:1]	25.9682	10.9104	43.0702	0.000398523	0.00505667	-15.6191	-26.7599	-2.78369	0.0188208	0.0846936	16.9197	-1.80855	39.2199	0.0791538	0.325878	1.29157	0.448682	2.14153	0.00267012	0.0508704
631	TG(48:2) [NL-16:1]	22.955	11.4284	35.6739	4.27683e-05	0.00175565	-8.48124	-17.9722	2.1079	0.112414	0.293443	18.5508	3.58187	35.6829	0.0135643	0.139694	0.751524	0.102648	1.40461	0.0232128	0.193359
632	TG(48:2) [NL-18:2]	18.8585	6.76159	32.3262	0.00165209	0.0146979	-15.2736	-24.8082	-4.53001	0.00658902	0.0451319	6.61067	-7.98052	23.5155	0.393347	0.674997	0.900116	0.191736	1.6135	0.012762	0.139124
633	TG(48:3) [NL-14:0]	30.7879	13.9251	50.1466	0.000148253	0.00279873	-21.1785	-32.3969	-8.09854	0.00243609	0.0225861	16.128	-3.8977	40.3267	0.121325	0.382391	1.18445	0.271816	2.1054	0.0109496	0.123902
634	TG(48:3) [NL-16:1]	24.3196	12.0343	37.952	4.53974e-05	0.00175565	-11.0262	-20.7497	-0.109628	0.0478747	0.164689	18.9063	3.09568	37.1416	0.0174572	0.162181	0.831865	0.145557	1.52288	0.0175229	0.167441
635	TG(48:3) [NL-18:3]	23.0221	8.94201	38.922	0.000866347	0.00906152	-19.6868	-29.8426	-8.06077	0.00152456	0.0161486	10.1463	-6.76373	30.1232	0.255267	0.553227	0.71968	-0.0806915	1.52646	0.0780343	0.345409
636	TG(49:1) [NL-16:1]	9.78723	1.42898	18.8342	0.0209055	0.0974749	-10.1293	-17.7061	-1.85495	0.0175579	0.0808918	0.52746	-9.81629	12.0576	0.924224	0.968297	0.369103	-0.151223	0.89214	0.164403	0.506299
637	TG(49:1) [NL-17:1]	17.4763	7.58101	28.2817	0.000351578	0.00472351	-11.2253	-19.5021	-2.09752	0.0171898	0.080636	9.02267	-3.36922	23.0037	0.160213	0.444462	0.563752	-0.0153981	1.14626	0.0564079	0.307463
638	TG(50:0) [NL-18:0]	29.7073	14.2192	47.2955	6.64732e-05	0.00187034	-6.05652	-18.4466	8.21594	0.385984	0.643351	16.7797	-1.90646	39.0254	0.0811252	0.327887	0.973123	0.133846	1.81944	0.0230401	0.193359
639	TG(50:1) [NL-14:0]	20.5024	9.48805	32.6248	0.000146895	0.00279873	-9.75471	-18.881	0.398383	0.0591472	0.191548	5.09446	-7.84975	19.8569	0.458096	0.72956	0.820029	0.187688	1.45636	0.0110455	0.123902
640	TG(50:1) [NL-16:0]	19.9367	10.3523	30.3535	2.1166e-05	0.00163669	-8.42576	-16.5277	0.462598	0.0625173	0.196701	12.1009	0.00245284	25.6631	0.049951	0.257747	0.877249	0.327282	1.43023	0.00178687	0.0406776
641	TG(50:1) [NL-18:1]	16.2287	7.97329	25.1153	6.88255e-05	0.00187034	-6.43099	-13.7929	1.55959	0.111674	0.293003	10.4772	-0.138714	22.2217	0.0532214	0.262378	0.767085	0.280954	1.25557	0.0020048	0.0443346
642	TG(50:2) [NL-14:0]	22.5856	10.9989	35.3817	6.36005e-05	0.00187034	-13.1972	-22.2729	-3.06172	0.0121	0.0673771	15.8705	1.12158	32.7705	0.0340115	0.215778	1.30442	0.646341	1.96679	0.000104925	0.013213
643	TG(50:2) [NL-16:1]	18.2607	8.27552	29.1666	0.000206601	0.00326346	-11.5024	-19.7729	-2.37921	0.0147363	0.0745483	10.7953	-1.82768	25.0413	0.0965445	0.347344	0.934804	0.352069	1.52092	0.00168057	0.0406489
644	TG(50:2) [NL-18:1]	16.3553	7.67702	25.7329	0.000137386	0.00272658	-9.99518	-17.4297	-1.89125	0.0167514	0.079819	13.4661	2.02483	26.1903	0.0199094	0.17242	0.910095	0.397991	1.42481	0.000505472	0.0226134
645	TG(50:2) [NL-18:2]	15.3121	5.36478	26.1985	0.00201638	0.0175282	-10.3985	-18.9529	-0.941211	0.0320336	0.124593	6.61076	-5.79443	20.6495	0.309893	0.615292	0.68019	0.0857728	1.27814	0.0249222	0.200935
646	TG(50:3) [NL-14:0]	25.4898	10.4648	42.5585	0.00050642	0.0061119	-19.4747	-30.1236	-7.20301	0.00282231	0.0250994	11.0946	-6.72884	32.3239	0.237822	0.540898	1.49706	0.651006	2.35023	0.000525893	0.0226134
647	TG(50:3) [NL-14:1]	25.274	11.3625	40.9234	0.000187171	0.00301813	-14.4023	-24.9067	-2.42847	0.0199955	0.0869467	10.9748	-5.56699	30.4143	0.205638	0.498194	1.37056	0.590335	2.15683	0.000578953	0.0235847
648	TG(50:3) [NL-16:1]	22.1524	10.6006	34.9107	8.5542e-05	0.00203245	-13.1307	-22.2181	-2.98166	0.0126183	0.0684931	15.1904	0.52063	32.0011	0.0419093	0.238513	1.18919	0.531507	1.85118	0.000399895	0.0200137
649	TG(50:3) [NL-18:2]	20.6368	8.89431	33.6455	0.000347464	0.00472351	-13.636	-22.9335	-3.21685	0.0117387	0.0663193	12.7227	-2.04515	29.7169	0.0944657	0.34327	1.16778	0.490031	1.8501	0.000739637	0.0246873
650	TG(50:3) [NL-18:3]	19.0325	6.85543	32.5973	0.00159985	0.01454	-14.4241	-24.1036	-3.51009	0.0110671	0.0647977	9.75573	-5.34174	27.2612	0.217165	0.508561	0.628634	-0.0816706	1.34399	0.0828266	0.362191
651	TG(50:4) [NL-14:0]	24.1368	7.34032	43.5615	0.00362363	0.027147	-23.2438	-34.7038	-9.77256	0.00138512	0.0153154	8.92707	-10.7601	32.9574	0.399888	0.681554	1.29888	0.336838	2.27015	0.00811924	0.0981921
652	TG(50:4) [NL-18:3]	25.471	10.4428	42.5441	0.000513273	0.0061119	-20.3342	-30.8733	-8.18843	0.00173615	0.0174517	15.7625	-2.81636	37.8932	0.10086	0.356463	0.932001	0.09033	1.78075	0.02997	0.212815
653	TG(50:4) [NL-20:4]	15.2396	0.222292	32.5071	0.0464776	0.162044	-24.1547	-35.0642	-11.4124	0.000506923	0.00713379	0.653584	-16.8848	21.8927	0.946741	0.973201	0.34852	-0.566937	1.27241	0.456214	0.764447
654	TG(51:0) [NL-16:0]	14.0669	4.04327	25.0561	0.00511326	0.0344145	-13.2436	-21.6802	-3.89828	0.00657472	0.0451319	2.29635	-9.82519	16.0473	0.723807	0.889043	0.678002	0.0720102	1.28766	0.0283252	0.208701
655	TG(51:1) [NL-17:0]	23.8638	11.9174	37.0855	3.90954e-05	0.00175565	-16.0434	-24.9996	-6.0176	0.00243463	0.0225861	14.2437	-0.58926	31.2899	0.0605279	0.288936	1.07164	0.401022	1.74674	0.00174624	0.0406776
656	TG(51:2) [NL-15:0]	23.051	9.86164	37.8239	0.000353958	0.00472351	-17.9265	-27.6504	-6.89569	0.00218973	0.0214538	17.2323	0.352611	36.9513	0.0450498	0.244733	1.40194	0.650114	2.15938	0.000260412	0.0183236
657	TG(51:2) [NL-17:0]	22.4677	10.7314	35.4479	8.71528e-05	0.00203245	-13.3845	-22.5656	-3.11468	0.0120453	0.0673771	16.2139	1.21973	33.4292	0.0330611	0.215036	1.2043	0.537302	1.87572	0.000407428	0.0200137
658	TG(51:2) [NL-17:1]	22.5873	10.7601	35.6774	9.04061e-05	0.00203245	-13.5566	-22.7812	-3.23015	0.0114875	0.0656169	16.2568	1.15763	33.6097	0.0338781	0.215778	1.21151	0.539732	1.88777	0.000413719	0.0200137
659	TG(52:1) [NL-18:0]	30.2853	16.454	45.7593	4.51008e-06	0.00163669	-8.30262	-19.0635	3.88894	0.173173	0.385433	18.3955	1.50786	38.0926	0.0315668	0.214322	1.11566	0.373514	1.86329	0.00322113	0.0566626
660	TG(52:1) [NL-18:1]	30.7502	15.6535	47.8175	2.07048e-05	0.00163669	-9.49578	-21.0406	3.73704	0.151543	0.355438	17.8054	-0.43635	39.3894	0.0562392	0.275501	1.33441	0.521618	2.15376	0.00129436	0.0345461
661	TG(52:2) [NL-16:0]	21.6052	11.5808	32.5301	9.57519e-06	0.00163669	-11.8177	-19.8645	-2.96282	0.0100833	0.0605	13.4844	0.856385	27.6936	0.0356297	0.220619	0.977335	0.408733	1.54916	0.000765499	0.0246873
662	TG(52:2) [NL-18:2]	20.1498	7.96102	33.7148	0.000799744	0.00850095	-10.7705	-20.7796	0.503151	0.0604443	0.193322	5.91403	-8.53587	22.6468	0.442002	0.717442	0.926306	0.220153	1.63744	0.0101464	0.117214
663	TG(52:3) [NL-16:1]	21.6262	10.4691	33.9101	7.24938e-05	0.00187034	-11.8252	-20.774	-1.86548	0.021256	0.0902136	12.1503	-1.71182	27.9674	0.088354	0.333721	1.19335	0.556274	1.83446	0.000245911	0.0183236
664	TG(52:3) [NL-18:2]	16.8178	6.12836	28.5839	0.0015435	0.0142541	-10.9373	-19.954	-0.904941	0.0334806	0.128925	12.1275	-1.69798	27.8975	0.0880884	0.333721	1.25537	0.61956	1.8952	0.000111786	0.013213
665	TG(52:4) [NL-16:1]	29.9816	14.5163	47.5354	5.44388e-05	0.00175565	-13.8217	-25.1473	-0.782552	0.0385588	0.140776	15.1154	-3.2401	36.953	0.112014	0.368931	1.53422	0.693485	2.38198	0.000349765	0.0200137
666	TG(52:4) [NL-18:2]	18.7126	6.0599	32.8748	0.00291319	0.0237348	-11.6475	-22.0567	0.151858	0.0528292	0.177782	12.7261	-3.41529	31.5652	0.12845	0.395178	1.22949	0.483398	1.98111	0.00124417	0.0345461
667	TG(52:4) [NL-18:3]	23.4961	9.3039	39.5309	0.000731891	0.00797864	-16.8626	-27.4183	-4.77181	0.00776656	0.0518217	10.6034	-6.44465	30.7579	0.237519	0.540898	1.20291	0.395213	2.0171	0.00351248	0.0583264
668	TG(52:5) [NL-18:3]	27.252	10.8006	46.1462	0.000671913	0.00753711	-17.2615	-29.069	-3.48837	0.0159568	0.0780412	14.0046	-5.70698	37.8367	0.175607	0.465478	0.884484	-0.0280842	1.80538	0.0574898	0.310848
669	TG(52:5) [NL-20:4]	16.3248	2.28867	32.287	0.0212541	0.0979206	-18.9414	-29.7437	-6.4782	0.00407381	0.0318498	8.5449	-9.00179	29.475	0.361461	0.65063	0.590717	-0.254724	1.44332	0.171047	0.515138
670	TG(52:5) [NL-20:5]	20.6481	3.91971	40.0693	0.0137969	0.0716699	-17.7847	-30.3609	-2.93745	0.0208616	0.0902061	4.72459	-14.6583	28.5097	0.657939	0.85624	0.567705	-0.412761	1.55782	0.256903	0.616425
671	TG(53:2) [NL-17:1]	20.5071	9.68149	32.4011	0.000110717	0.00225514	-12.0853	-20.824	-2.38205	0.0159839	0.0780412	14.0985	0.282415	29.818	0.0452155	0.244733	1.13486	0.511937	1.76165	0.000362049	0.0200137
672	TG(53:2) [NL-18:1]	22.9625	11.7985	35.2414	2.32604e-05	0.00163669	-14.594	-23.1735	-5.05642	0.00355926	0.0293071	19.107	4.53326	35.7127	0.00873268	0.113981	1.28857	0.657729	1.92336	6.44562e-05	0.0124723
673	TG(54:0) [NL-18:0]	14.4626	4.2694	25.6523	0.00460492	0.0322721	0.300331	-9.58335	11.2644	0.954745	0.982677	6.13696	-6.60531	20.6177	0.360764	0.65063	0.693103	0.0785313	1.31145	0.0270846	0.208701
674	TG(54:1) [NL-18:1]	26.7931	12.5995	42.7759	9.61515e-05	0.00206726	-6.26604	-17.8609	6.96559	0.336212	0.584782	14.2665	-2.90007	34.468	0.108163	0.365973	1.10702	0.322201	1.89798	0.00569978	0.0832383
675	TG(54:2) [NL-18:0]	28.4224	14.967	43.4526	1.07957e-05	0.00163669	-10.6173	-20.9703	1.0921	0.073853	0.225048	22.0046	4.82476	42	0.0103033	0.124606	1.43873	0.704465	2.17835	0.000125044	0.013213
676	TG(54:2) [NL-20:1]	26.3267	13.2542	40.9081	3.05942e-05	0.00175565	-8.20383	-18.7061	3.65517	0.166976	0.377893	26.2191	8.66064	46.6148	0.00236754	0.0572648	1.56771	0.842065	2.29858	2.37089e-05	0.00891881
677	TG(54:3) [NL-18:1]	15.2262	7.09306	23.977	0.000158084	0.00291327	-2.93017	-10.52	5.3035	0.473406	0.711488	15.872	4.80623	28.1062	0.00408895	0.0771914	1.28219	0.79673	1.76999	2.64516e-07	0.000204735
678	TG(54:3) [NL-18:2]	22.3645	10.6476	35.3221	9.19068e-05	0.00203245	-10.3134	-19.8124	0.310906	0.0566777	0.186675	13.9999	-0.696892	30.8717	0.0627505	0.296152	1.07869	0.413086	1.7487	0.0015012	0.0387309
679	TG(54:4) [NL-18:2]	13.2684	2.42637	25.258	0.0153142	0.0769688	-10.8733	-20.3097	-0.31957	0.0438176	0.154862	10.4786	-3.75921	26.8228	0.156558	0.442246	1.41321	0.745656	2.08519	3.4569e-05	0.00891881
680	TG(54:4) [NL-20:3]	17.2712	5.04997	30.9142	0.0046214	0.0322721	-14.4284	-24.2873	-3.28571	0.0126889	0.0684931	7.83566	-7.26933	25.4011	0.326607	0.627578	0.91087	0.184545	1.64246	0.0139747	0.150228
681	TG(54:5) [NL-18:3]	22.393	9.83819	36.3829	0.000267796	0.00406419	-11.0883	-21.1723	0.285558	0.0556607	0.184108	14.867	-0.975501	33.2441	0.0671181	0.308353	1.09593	0.380292	1.81667	0.00269468	0.0508704
682	TG(54:5) [NL-20:4]	12.2129	-0.149144	26.1055	0.0529926	0.178332	-17.4489	-27.4994	-6.00505	0.00386024	0.0308023	2.06181	-13.0332	19.7769	0.80234	0.934503	0.342083	-0.423737	1.11379	0.381692	0.717171
683	TG(54:6) [NL-18:3]	23.2195	9.39204	38.7949	0.000611324	0.0069583	-11.8789	-22.8061	0.595059	0.0611515	0.194779	13.2993	-3.76288	33.3865	0.13351	0.405242	0.906032	0.120733	1.69749	0.0237327	0.193359
684	TG(54:6) [NL-20:4]	10.639	-2.05638	24.9798	0.10381	0.284625	-17.2715	-27.7595	-5.26097	0.00619882	0.0440173	2.8821	-12.9523	21.5968	0.738571	0.889043	0.387791	-0.412112	1.19412	0.342409	0.686592
685	TG(54:6) [NL-20:5]	19.7943	4.06761	37.8976	0.0119852	0.0643483	-19.2841	-30.9796	-5.60676	0.00739244	0.0501908	11.8267	-7.79918	35.6303	0.255747	0.553227	0.780346	-0.14634	1.71563	0.0989367	0.409443
686	TG(54:6) [NL-22:6]	13.997	-0.146691	30.144	0.0525849	0.177732	-7.9944	-20.5992	6.61137	0.267177	0.506851	-3.16189	-19.2472	16.1275	0.728423	0.889043	0.133176	-0.73372	1.00764	0.763818	0.928093
687	TG(54:7) [NL-20:5]	22.2419	3.95956	43.7393	0.015197	0.0768789	-19.362	-32.6579	-3.44086	0.0193247	0.0854702	7.46369	-13.9428	34.1949	0.52475	0.775875	0.76684	-0.298978	1.84405	0.158785	0.505159
688	TG(54:7) [NL-22:6]	19.364	3.07979	38.2207	0.0181013	0.0870209	-11.1438	-24.5191	4.60161	0.155442	0.362983	3.78668	-15.1222	26.9081	0.716778	0.886239	0.541475	-0.42184	1.51411	0.271073	0.628776
689	TG(56:6) [NL-20:4]	8.97097	-2.307	21.5509	0.123024	0.313045	-16.5893	-26.1335	-5.81207	0.00350124	0.0293071	3.54341	-10.8625	20.2775	0.6482	0.851794	0.431644	-0.285987	1.15444	0.238624	0.595791
690	TG(56:6) [NL-22:5](a)	12.0891	1.0383	24.3486	0.031218	0.121623	-7.61203	-17.6853	3.69389	0.178525	0.394386	3.77762	-9.98981	19.6508	0.609069	0.831225	0.478542	-0.203684	1.16543	0.169273	0.511786
691	TG(56:6) [NL-22:5](b)	12.1635	1.12455	24.4075	0.0299531	0.120424	-7.62582	-17.6802	3.65655	0.176918	0.392362	3.811	-9.93744	19.6582	0.605309	0.831225	0.487397	-0.193646	1.17309	0.160786	0.505559
692	TG(56:7) [NL-20:4]	10.8415	-2.93546	26.574	0.128264	0.319107	-19.3629	-30.4299	-6.53524	0.0043438	0.033621	1.35477	-15.5104	21.5865	0.88459	0.964328	0.39934	-0.471531	1.27783	0.369299	0.709274
693	TG(56:7) [NL-20:5]	18.904	4.18792	35.6988	0.0103006	0.0569475	-19.9956	-30.9294	-7.33099	0.00298653	0.0259727	10.2461	-8.0223	32.143	0.290735	0.597504	0.642792	-0.226229	1.51938	0.14729	0.495664
694	TG(56:7) [NL-22:5](a)	12.7551	1.53911	25.2101	0.0247977	0.107409	-9.19092	-19.1801	2.03292	0.104735	0.2805	2.26674	-11.4193	18.0674	0.759403	0.902884	0.485624	-0.203069	1.17907	0.167039	0.50741
695	TG(56:7) [NL-22:5](b)	12.7244	1.53246	25.1501	0.0248401	0.107409	-9.21399	-19.1821	1.98355	0.103145	0.27914	2.27858	-11.384	18.0476	0.757736	0.902288	0.486759	-0.200588	1.17884	0.165219	0.506299
696	TG(56:7) [NL-22:6]	15.4415	1.8609	30.8327	0.024605	0.107409	-7.47694	-19.5004	6.34233	0.273345	0.513517	3.02503	-13.222	22.3139	0.733186	0.889043	0.387217	-0.43409	1.2153	0.355892	0.690382
697	TG(56:8) [NL-20:4]	6.96021	-6.73475	22.6661	0.33517	0.572674	-19.405	-30.7968	-6.13797	0.00560322	0.0409141	-4.68302	-21.0089	15.0171	0.616282	0.835432	-0.190447	-1.08402	0.711197	0.677332	0.888832
698	TG(56:8) [NL-20:5]	14.4366	-1.52756	32.9889	0.0784566	0.228291	-20.2827	-32.5507	-5.78326	0.00793018	0.0520166	4.56643	-14.9022	28.4891	0.670503	0.862075	0.607475	-0.379823	1.60456	0.228248	0.58305
699	TG(56:8) [NL-22:6]	14.3805	-0.27082	31.1844	0.0546926	0.180136	-8.9048	-21.7863	6.09823	0.230061	0.463717	1.23917	-16.1083	22.1739	0.89765	0.968297	0.507857	-0.392381	1.41623	0.269268	0.627752
700	TG(56:9) [NL-22:6]	18.6784	2.15181	37.8788	0.0252788	0.108699	-12.5737	-26.0045	3.29491	0.114124	0.295424	0.847118	-17.8967	23.8701	0.935812	0.9717	0.329407	-0.65329	1.32183	0.511954	0.792422
701	TG(58:10) [NL-22:6]	10.2407	-4.86301	27.7422	0.194273	0.414236	-11.1585	-24.5881	4.66277	0.156759	0.362983	-1.08339	-19.1798	21.065	0.915711	0.968297	-0.0254526	-0.987719	0.946165	0.958791	0.997988
702	TG(58:8) [NL-22:6]	13.3457	-0.10992	28.6138	0.0520208	0.177375	-7.51758	-19.6445	6.43949	0.275278	0.515896	3.51236	-12.9568	23.0976	0.69575	0.87568	0.637945	-0.19338	1.47619	0.132684	0.468937
703	TG(58:9) [NL-22:6]	16.8948	1.04688	35.2283	0.0357674	0.133554	-11.716	-24.923	3.81426	0.131501	0.3232	2.32674	-16.2032	24.9541	0.821185	0.943022	0.551839	-0.405142	1.51801	0.258835	0.616425
704	TG(O-50:1) [NL-15:0]	4.68638	-4.03892	14.205	0.301755	0.547316	-5.69051	-14.3914	3.89467	0.23501	0.469006	4.79749	-6.99104	18.0802	0.440887	0.717442	0.474608	-0.0976947	1.05019	0.104072	0.41323
705	TG(O-50:1) [NL-16:0]	1.84913	-4.60431	8.73915	0.582708	0.770968	-3.14638	-9.94747	4.16836	0.388828	0.643351	6.24985	-2.87168	16.228	0.185199	0.479412	-0.00571544	-0.434434	0.424849	0.979166	0.999552
706	TG(O-50:1) [NL-17:1]	2.89639	-2.35951	8.4352	0.285259	0.532026	1.92491	-3.84895	8.0455	0.521042	0.756988	3.77052	-3.42814	11.5058	0.312393	0.618394	-0.172915	-0.515874	0.171226	0.323721	0.672723
707	TG(O-50:1) [NL-18:1]	3.4454	-2.82855	10.1244	0.288076	0.535988	-4.11709	-10.5628	2.79311	0.235891	0.469006	12.1606	2.93906	22.2082	0.00883571	0.113981	0.0048511	-0.405007	0.416396	0.981499	0.999552
708	TG(O-50:2) [NL-16:1]	3.12356	-3.56946	10.2811	0.368378	0.601039	-5.62009	-12.408	1.69379	0.128537	0.319973	10.1129	0.432871	20.726	0.0402042	0.237542	0.194088	-0.246264	0.636383	0.38762	0.717746
709	TG(O-50:2) [NL-18:1]	-0.204567	-5.74333	5.65967	0.943872	0.973426	-7.41995	-13.117	-1.34937	0.0174359	0.0808918	0.440566	-7.12382	8.62104	0.912236	0.968297	-0.179486	-0.552915	0.195344	0.346899	0.68846
710	TG(O-50:2) [NL-18:2]	11.3298	1.53017	22.0753	0.0225094	0.100128	2.04527	-7.89474	13.058	0.698157	0.859099	11.5086	-1.72649	26.5262	0.0909302	0.336746	0.146187	-0.457669	0.753705	0.635408	0.870418
711	TG(O-50:3) [NL-18:2]	2.98069	-14.6027	24.1845	0.758111	0.881171	-16.8119	-32.4506	2.44729	0.0830919	0.240873	-6.17359	-27.4183	21.2894	0.626095	0.838404	-1.2157	-2.42226	0.00577621	0.051083	0.288877
712	TG(O-52:0) [NL-16:0]	1.63789	-5.01204	8.75337	0.637426	0.81146	-7.79965	-14.4842	-0.592633	0.0344991	0.131538	0.356207	-8.53657	10.1136	0.94003	0.9717	-0.194286	-0.636591	0.249988	0.390164	0.719017
713	TG(O-52:1) [NL-16:0]	2.25833	-4.44262	9.42918	0.517793	0.721244	-10.9709	-17.4355	-4.00008	0.00257316	0.0231585	2.13726	-6.92726	12.0846	0.655109	0.85624	0.0459062	-0.398177	0.491969	0.839501	0.957607
714	TG(O-52:1) [NL-18:1]	4.80172	-1.64873	11.6752	0.147587	0.351485	-6.92895	-13.278	-0.115046	0.0463942	0.160309	6.68359	-2.21612	16.3933	0.145176	0.42243	0.0187373	-0.397439	0.436653	0.929709	0.989814
715	TG(O-52:2) [NL-16:0]	2.7799	-5.27581	11.5207	0.509647	0.718518	-1.30714	-9.87212	8.07178	0.776011	0.902552	10.8372	-0.898811	23.9631	0.071497	0.31273	0.342502	-0.19364	0.881524	0.210542	0.567804
716	TG(O-52:2) [NL-17:1]	6.06303	0.420879	12.0222	0.0348579	0.132255	-3.07462	-8.79209	3.00126	0.313495	0.559081	6.49595	-1.19479	14.7853	0.0996688	0.35387	0.179339	-0.179463	0.53943	0.327103	0.672723
717	TG(O-52:2) [NL-18:1]	4.15771	-1.52619	10.1697	0.154477	0.360135	-2.98236	-8.85262	3.26597	0.341116	0.589339	8.78051	0.724012	17.4814	0.0321108	0.214579	0.154091	-0.214133	0.523673	0.411979	0.734727
718	TG(O-54:2) [NL-17:1]	-4.84047	-14.3679	5.74696	0.356022	0.595239	-3.52235	-14.2038	8.48895	0.548597	0.769228	2.97047	-10.8978	18.9972	0.6912	0.873703	-0.286614	-0.974693	0.406247	0.41592	0.738354
719	TG(O-54:2) [NL-18:1]	5.23948	-0.450333	11.2545	0.0716613	0.218238	-6.79712	-12.3846	-0.853356	0.0257082	0.105841	7.82201	-0.0904032	16.361	0.0527722	0.261832	0.228148	-0.136849	0.594479	0.22039	0.574349
720	TG(O-54:3) [NL-17:1]	15.6282	-12.7273	53.1966	0.31115	0.553632	-4.03001	-29.8167	31.2312	0.796364	0.908211	27.9318	-13.0173	88.1585	0.210331	0.499747	0.551019	-1.2888	2.42513	0.559165	0.824867
721	TG(O-54:3) [NL-18:1]	9.17154	2.06428	16.7737	0.010712	0.0588018	-5.08827	-11.9352	2.29102	0.17126	0.385433	12.8823	2.92874	23.7984	0.0101741	0.124606	0.3033	-0.138926	0.747483	0.178797	0.515824
722	TG(O-54:4) [NL-17:1]	29.0799	4.41139	59.5768	0.0184151	0.0879832	4.10404	-17.7726	31.801	0.737853	0.890468	27.8023	-4.4496	70.9405	0.0981276	0.350004	0.631895	-0.759344	2.04264	0.374551	0.714046
723	TG(O-54:4) [NL-18:2]	19.6953	2.58501	39.6594	0.0224361	0.100128	4.36868	-12.0863	23.9036	0.624694	0.815368	27.439	3.14269	57.4585	0.024734	0.186341	0.603041	-0.41045	1.62684	0.244001	0.603315
724	Ubiquinone	3.85519	-2.87854	11.0558	0.268197	0.512555	0.747862	-6.49073	8.5468	0.844472	0.925823	3.34562	-5.73051	13.2956	0.482251	0.749863	0.174272	-0.265535	0.616019	0.437354	0.753925
725	CE(18:2) [+OH]	-2.59921	-17.0027	14.3038	0.746642	0.878269	-3.47435	-19.2128	15.3301	0.696536	0.859099	5.86778	-14.991	31.8447	0.609994	0.831225	-0.253583	-1.29582	0.79966	0.63514	0.870418
726	CE(20:4) [+OH]	-0.785341	-8.52254	7.60627	0.848812	0.930567	-0.919209	-9.47484	8.44502	0.840898	0.925823	1.5393	-9.15901	13.4975	0.787662	0.922315	-0.110272	-0.641208	0.423501	0.684449	0.891858
727	CE(22:6) [+OH]	1.38422	-5.29579	8.53541	0.692153	0.838383	0.721677	-6.63182	8.65432	0.85228	0.925823	4.00215	-5.27773	14.1912	0.409926	0.682546	-0.193878	-0.639399	0.25364	0.394591	0.723729
728	LPC(18:2) [+OH]	-7.47721	-17.0034	3.14241	0.160626	0.369179	-3.09037	-14.1222	9.35855	0.61014	0.80769	-11.311	-23.5877	2.93824	0.114125	0.369617	-0.00801428	-0.718619	0.707677	0.982399	0.999552
729	LPC(20:4) [+OH]	-13.8389	-27.3478	2.18182	0.0867925	0.245173	-12.9985	-28.0302	5.17276	0.149893	0.353712	-25.5833	-41.1003	-5.97836	0.0133521	0.139656	0.240282	-0.875517	1.36864	0.673846	0.888832
730	LPC(22:6) [+OH]	-5.64004	-18.9952	9.91696	0.455288	0.678984	-6.23811	-20.8758	11.1075	0.456396	0.699506	-15.9743	-31.8399	3.58423	0.102899	0.357147	-0.00724712	-1.00387	0.999412	0.988667	0.999552
731	PC(34:2) [+OH]	-0.323081	-9.84171	10.2005	0.94953	0.973426	-0.869213	-11.3403	10.8385	0.877985	0.939917	7.1198	-6.65334	22.9251	0.326756	0.627578	-0.347495	-1.00184	0.311179	0.299809	0.655594
732	PC(36:4) [+OH]	-1.25902	-7.85448	5.80853	0.719009	0.863302	3.10041	-4.53003	11.3407	0.435767	0.685535	-4.50217	-13.1391	4.99353	0.340259	0.634604	-0.162906	-0.614907	0.29115	0.480672	0.782417
733	PC(38:6) [+OH]	3.15055	-3.55428	10.3215	0.365065	0.599334	-15.355	-21.4518	-8.78492	1.40643e-05	0.00037537	1.75695	-7.20181	11.5806	0.710646	0.885732	-0.176465	-0.615868	0.264881	0.431999	0.752333

## Sheet: 1F
1F: Effect of mode of delivery and duration of labour on newborn cord serum lipid classes
		Assisted vaginal delivery					Scheduled Caesarean					Unscheduled caesarean					Duration of labour
Lipid #	Lipid class	Percent difference 1	95% Lower CL2	95% Upper CL2	p-value	p-value (BH)3	Percent difference 4	95% Lower CL2	95% Upper CL2	p-value	p-value (BH)3	Percent difference 5	95% Lower CL2	95% Upper CL2	p-value	p-value (BH)3	Percent difference 6	95% Lower CL2	95% Upper CL2	p-value	p-value (BH)3
1	Sph	14.9798	1.30209	30.5043	0.0308181	0.121623	-27.1882	-36.7553	-16.1739	1.15579e-05	0.000319493	-12.0211	-26.047	4.66487	0.148041	0.428699	0.0895607	-0.739043	0.925082	0.832573	0.957607
2	S1P	6.08968	-1.87936	14.7059	0.137598	0.332815	-1.98561	-10.1392	6.90784	0.650338	0.832003	-7.67872	-17.0533	2.75533	0.143331	0.42022	-0.220956	-0.731066	0.291776	0.397006	0.724723
3	dhCer	9.78179	2.84163	17.1903	0.00517107	0.0345035	4.17107	-3.12717	12.0192	0.269637	0.508108	7.87508	-1.36503	17.9808	0.0969333	0.347344	0.584843	0.154611	1.01692	0.00775221	0.0952414
4	Cer	8.14382	1.90929	14.7598	0.00984767	0.0556357	3.62048	-3.00201	10.6951	0.290668	0.538222	11.6632	2.93158	21.1355	0.0080044	0.106817	0.390858	0.000341415	0.782899	0.0498003	0.288877
5	C1P	-2.34487	-10.1959	6.19255	0.578401	0.767894	-12.5809	-20.3618	-4.03974	0.00477261	0.0362157	-4.94991	-15.2693	6.62629	0.38599	0.671363	-0.195124	-0.742671	0.355444	0.485897	0.783509
6	HexCer	-3.39238	-9.52698	3.15818	0.301943	0.547316	-0.962586	-7.93204	6.53445	0.794697	0.908211	-7.17779	-15.1636	1.55976	0.104461	0.360951	-0.016261	-0.445893	0.415225	0.940901	0.993995
7	Hex2Cer	2.88999	-4.27356	10.5896	0.438435	0.661499	5.91579	-2.25351	14.7679	0.160163	0.367464	0.320103	-9.13186	10.7553	0.949446	0.973201	0.556512	0.0813162	1.03396	0.0217392	0.191206
8	Hex3Cer	-1.03193	-6.63204	4.90408	0.726655	0.863949	0.675418	-5.64034	7.41391	0.838377	0.925823	-2.63631	-10.1106	5.45948	0.511476	0.770395	-0.270108	-0.650686	0.111928	0.165245	0.506299
9	GM3	1.00297	-4.48947	6.81125	0.726055	0.863949	-4.22517	-9.99999	1.92019	0.173296	0.385433	-2.72917	-9.90826	5.022	0.478714	0.749863	-0.0740914	-0.440155	0.293318	0.691777	0.895585
10	GM1	-0.609274	-5.162	4.162	0.798052	0.909709	-0.133602	-5.20838	5.21286	0.959863	0.982717	-4.03223	-10.0084	2.34076	0.209171	0.499747	-0.0583596	-0.365477	0.249705	0.709636	0.900424
11	SHexCer	-0.486744	-5.89012	5.22687	0.863769	0.934644	-1.00492	-6.96506	5.33704	0.749494	0.891371	-3.67227	-10.7713	3.99155	0.337516	0.634072	-0.0704611	-0.435979	0.296398	0.705732	0.900424
12	SM	2.92866	-3.19928	9.44452	0.356067	0.595239	-0.433321	-7.00411	6.60174	0.900625	0.952259	-0.559746	-8.58697	8.17238	0.895837	0.968297	0.000383881	-0.401707	0.404098	0.998508	0.999552
13	PA	13.2869	-0.997709	29.6326	0.0695894	0.215449	21.4304	4.5254	41.0694	0.0112182	0.0647977	21.3581	0.879705	45.9936	0.0401189	0.237542	0.819421	-0.0685757	1.71531	0.0705403	0.345409
14	PC	2.87309	-1.41538	7.34812	0.19189	0.411922	-2.00793	-6.54074	2.74473	0.400612	0.64763	2.02576	-3.76081	8.16026	0.500201	0.762117	0.0915915	-0.187769	0.371734	0.520269	0.797402
15	PC(O)	-0.581898	-6.35652	5.54882	0.848165	0.930567	-1.65229	-7.98493	5.11617	0.623156	0.814734	-0.194404	-8.05689	8.34044	0.962866	0.97803	-0.181158	-0.572454	0.211679	0.364955	0.702674
16	PC(P)	-0.753265	-7.58392	6.58225	0.835103	0.924706	-2.71755	-10.1353	5.31244	0.495347	0.727545	-3.45058	-12.4444	6.46703	0.48089	0.749863	-0.293793	-0.759382	0.173981	0.217474	0.572767
17	LPC	3.98522	-1.08467	9.31496	0.125202	0.316144	-2.90763	-8.15825	2.64316	0.297656	0.544647	-4.19171	-10.5385	2.60534	0.220307	0.510533	-0.10467	-0.431881	0.223616	0.530969	0.805823
18	LPC(O)	5.94584	0.467881	11.7225	0.0330353	0.126581	0.246726	-5.50143	6.34454	0.934706	0.971449	-0.996083	-7.94739	6.48014	0.787197	0.922315	-0.202516	-0.549679	0.14586	0.253696	0.613626
19	LPC(P)	2.84215	-2.41457	8.38205	0.294578	0.541575	-2.4826	-8.01055	3.37755	0.397861	0.646941	-3.22738	-9.94514	3.99149	0.370852	0.659861	-0.303417	-0.646168	0.040516	0.083621	0.363611
20	PE	11.6003	4.25898	19.4586	0.00161555	0.01454	-2.81098	-9.89524	4.83027	0.459661	0.70086	12.4618	2.44293	23.4604	0.0137167	0.139694	0.613362	0.164981	1.06375	0.00737276	0.0949025
21	PE(O)	2.62297	-4.6388	10.4377	0.488652	0.701365	-8.31315	-15.5001	-0.514935	0.0372075	0.138455	2.26973	-7.52129	13.0974	0.661539	0.85624	-0.228019	-0.707486	0.253763	0.352385	0.690382
22	PE(P)	2.37032	-3.97366	9.13342	0.472306	0.692357	0.229328	-6.65476	7.62111	0.949608	0.979996	0.943671	-7.53423	10.1989	0.83352	0.943041	-0.0597691	-0.478556	0.36078	0.779859	0.936614
23	LPE	2.64044	-2.59459	8.15683	0.328599	0.565976	-0.78867	-6.40049	5.1596	0.789506	0.90799	-1.65742	-8.46949	5.66164	0.647651	0.851794	0.0726528	-0.270626	0.417113	0.678215	0.888832
24	LPE(P)	1.56563	-5.8963	9.61925	0.68942	0.836382	3.72871	-4.7119	12.917	0.397264	0.646941	-4.99279	-14.4316	5.48715	0.336776	0.634072	0.172292	-0.328189	0.675287	0.499937	0.792422
25	PI	7.65224	3.5009	11.9701	0.000252224	0.00390443	-5.42545	-9.47301	-1.19692	0.0125257	0.0684931	4.14669	-1.32069	9.91699	0.139464	0.413583	0.157074	-0.101126	0.415942	0.232888	0.589069
26	PIP1	1.79476	-5.46877	9.61641	0.637147	0.81146	-4.21765	-11.7883	4.00273	0.304439	0.55184	2.13323	-7.72555	13.0453	0.683135	0.871516	-0.061444	-0.545879	0.425351	0.803891	0.945344
27	LPI	3.74134	-0.997048	8.70652	0.123358	0.313045	-8.08757	-12.7448	-3.18175	0.00152268	0.0161486	-8.79716	-14.4604	-2.75895	0.00494707	0.0814688	-0.0534485	-0.359681	0.253725	0.732344	0.912802
28	PS	2.14733	-11.4676	17.856	0.770617	0.891566	8.50224	-7.45772	27.2147	0.314212	0.559081	-1.07294	-18.6931	20.3657	0.914024	0.968297	0.683704	-0.257231	1.63352	0.154614	0.505159
29	PG	20.3158	8.56191	33.3423	0.000442288	0.00552146	3.12315	-8.01877	15.6147	0.597521	0.800039	35.3738	17.5751	55.8669	2.83136e-05	0.00226688	0.829801	0.151733	1.51246	0.0164663	0.161328
30	CE	-1.77143	-6.74796	3.47069	0.499835	0.708885	0.977891	-4.6958	6.98935	0.741133	0.890468	-1.99524	-8.739	5.24685	0.578956	0.808962	-0.152432	-0.492594	0.188893	0.380339	0.717171
31	DE	-6.33592	-11.3323	-1.05802	0.0193544	0.0919035	0.565121	-5.38342	6.88765	0.856022	0.925823	-11.5869	-17.9893	-4.68474	0.00136371	0.0439839	-0.56198	-0.919138	-0.203534	0.00219489	0.0471901
32	FFA	-0.792207	-5.27222	3.89969	0.735448	0.869064	-21.6053	-25.5327	-17.4707	2.69776e-19	5.22016e-17	-12.9991	-18.3408	-7.30796	1.86256e-05	0.00189541	-0.0426718	-0.345394	0.26097	0.782362	0.936614
33	AC	18.3932	8.73774	28.9061	0.000108198	0.00225514	-9.58441	-17.7475	-0.611187	0.0369338	0.138455	5.30533	-6.28963	18.3349	0.384482	0.671363	0.635674	0.0752854	1.1992	0.0262111	0.208701
34	DG	17.7951	8.98084	27.3222	4.05313e-05	0.00175565	-8.73077	-16.2942	-0.483962	0.0384998	0.140776	18.6609	6.65744	32.0152	0.00171014	0.0462469	0.639535	0.12708	1.15461	0.0144721	0.151371
35	TG	18.2562	9.08553	28.1978	5.12828e-05	0.00175565	-10.6905	-18.3595	-2.30108	0.0136705	0.071169	11.6179	-0.0776839	24.6823	0.051625	0.25997	0.920418	0.387114	1.45656	0.000729436	0.0246873
36	TG(O)	3.32953	-2.22122	9.19539	0.244484	0.482732	-4.27342	-9.97549	1.78982	0.163034	0.372237	6.89375	-0.900797	15.3014	0.0842834	0.332743	0.0409339	-0.320986	0.404167	0.824565	0.957607
37	Lipid(ox)	-2.97415	-11.8011	6.73626	0.534389	0.733363	-4.53846	-14.1474	6.1459	0.390226	0.643351	0.689963	-11.6548	14.7596	0.9178	0.968297	-0.173863	-0.796905	0.453092	0.585356	0.849935

## Sheet: 1G
1G: Effect of mode of delivery and duration of labour on maternal serum lipid species
		Forceps delivery					Vaccum delivery					Scheduled caesarean					Unscheduled caesarean					Duration of labour
Lipid #	Lipid species	β coeffecient 1	95% Lower CL2	95% Upper CL2	p-value	p-value (BH)3	β coeffecient 4	95% Lower CL2	95% Upper CL2	p-value	p-value (BH)3	β coeffecient 5	95% Lower CL2	95% Upper CL2	p-value	p-value (BH)3	β coeffecient 6	95% Lower CL2	95% Upper CL2	p-value	p-value (BH)3	β coeffecient 7	95% Lower CL2	95% Upper CL2	p-value	p-value (BH)3
1	Sph(d16:1)	0.555361	-0.24709	1.35781	0.17453	0.725448	0.171016	-0.49496	0.836993	0.614127	0.993025	-3.10817	-8.66544	2.44911	0.272366	0.990282	0.465249	-0.254352	1.18485	0.204588	0.992818	-0.0103184	-0.0492769	0.0286401	0.603047	0.877957
2	Sph(d18:1)	0.220219	-0.0742221	0.514661	0.142342	0.714758	0.131509	-0.112857	0.375874	0.290876	0.993025	0.0640883	-1.97503	2.10321	0.950788	0.992558	0.288299	0.0242578	0.552341	0.0324153	0.992818	-0.00331665	-0.0176116	0.0109783	0.648707	0.888671
3	Sph(d18:2)	0.123284	-0.182452	0.42902	0.428602	0.81565	0.019378	-0.234361	0.273117	0.880793	0.993025	-0.0745928	-2.19193	2.04274	0.944847	0.992558	0.0407441	-0.233426	0.314914	0.770432	0.992818	-0.00529828	-0.0201416	0.00954503	0.483451	0.846586
4	S1P(d16:1)	0.193237	-0.113587	0.500061	0.216537	0.725448	0.122528	-0.132114	0.377171	0.344931	0.993025	-0.570986	-2.69586	1.55389	0.597777	0.990282	0.111238	-0.163908	0.386384	0.427402	0.992818	0.000514186	-0.014382	0.0154103	0.945959	0.988418
5	S1P(d18:0)	0.462319	0.148573	0.776066	0.00395502	0.55448	0.180614	-0.0797732	0.441001	0.173565	0.993025	-0.822969	-2.99578	1.34984	0.457144	0.990282	0.348478	0.0671247	0.629831	0.0153033	0.992818	-0.0111773	-0.0264095	0.00405492	0.150019	0.600159
6	S1P(d18:1)	0.388622	0.084166	0.693079	0.0124607	0.55448	0.235573	-0.0171044	0.48825	0.0675885	0.993025	0.980555	-1.12792	3.08903	0.361325	0.990282	0.298071	0.025049	0.571094	0.032435	0.992818	-0.00419681	-0.018978	0.0105844	0.577212	0.873572
7	S1P(d18:2)	0.216415	-0.0719426	0.504772	0.14097	0.714758	0.210133	-0.0291829	0.449449	0.0851227	0.993025	0.547827	-1.44916	2.54481	0.590152	0.990282	0.167914	-0.0906717	0.426499	0.202625	0.992818	-0.00329649	-0.0172961	0.0107031	0.643837	0.885133
8	Cer(d18:0/16:0)	0.177215	-0.0876673	0.442098	0.189299	0.725448	0.0987508	-0.121083	0.318584	0.377905	0.993025	-0.191185	-2.0256	1.64323	0.837842	0.990282	0.00779522	-0.229739	0.24533	0.948618	0.999302	0.00484673	-0.00801318	0.0177066	0.459369	0.839187
9	Cer(d18:0/18:0)	0.048067	-0.201447	0.297581	0.705235	0.94331	0.0558881	-0.15119	0.262967	0.59618	0.993025	1.43045	-0.297524	3.15843	0.10449	0.990282	0.0778207	-0.145932	0.301573	0.494727	0.992818	-0.00116344	-0.0132772	0.0109503	0.85041	0.951182
10	Cer(d18:0/20:0)	0.0429433	-0.22998	0.315866	0.75735	0.951044	-0.163497	-0.390004	0.0630094	0.156768	0.993025	0.0247907	-1.86531	1.91489	0.979452	0.99449	-0.0445871	-0.289332	0.200158	0.720555	0.992818	0.00388892	-0.00936135	0.0171392	0.564452	0.872027
11	Cer(d18:0/22:0)	0.00711833	-0.255866	0.270103	0.957611	0.992966	0.0958176	-0.12244	0.314076	0.388818	0.993025	0.816614	-1.00465	2.63788	0.378786	0.990282	0.114016	-0.121816	0.349848	0.342649	0.992818	0.00458963	-0.00817811	0.0173574	0.480366	0.846586
12	Cer(d18:0/24:0)	0.165252	-0.100695	0.431199	0.222737	0.732624	0.125591	-0.0951261	0.346308	0.264133	0.993025	0.226572	-1.61521	2.06836	0.80912	0.990282	0.145308	-0.093181	0.383797	0.231852	0.992818	0.000609272	-0.0123023	0.0135208	0.926172	0.984469
13	Cer(d18:0/24:1)	0.2266	-0.0279649	0.481165	0.0809256	0.650738	0.0947014	-0.116569	0.305972	0.378925	0.993025	1.48622	-0.276734	3.24918	0.098288	0.990282	0.263915	0.0356327	0.492197	0.0235461	0.992818	0.000369029	-0.01199	0.012728	0.953244	0.988418
14	Cer(d16:1/16:0)	0.0754065	-0.205193	0.356006	0.597752	0.893581	-0.069241	-0.302119	0.163637	0.559382	0.993025	-1.51048	-3.45373	0.432782	0.127358	0.990282	-0.159145	-0.410774	0.0924834	0.214602	0.992818	0.00702229	-0.00660067	0.0206452	0.311673	0.778197
15	Cer(d16:1/18:0)	0.00627342	-0.269466	0.282012	0.964365	0.992966	0.0172578	-0.211586	0.246101	0.882275	0.993025	-0.135455	-2.04505	1.77414	0.889221	0.990282	-0.111288	-0.358558	0.135982	0.376996	0.992818	0.00384282	-0.00954416	0.0172298	0.573026	0.873572
16	Cer(d16:1/20:0)	-0.00965589	-0.292267	0.272955	0.946508	0.990936	-0.0455119	-0.280059	0.189035	0.703196	0.993025	-1.16047	-3.11766	0.796716	0.244608	0.990282	-0.204165	-0.457598	0.0492672	0.114108	0.992818	0.00344914	-0.0102715	0.0171697	0.621603	0.877957
17	Cer(d16:1/22:0)	-0.140829	-0.416429	0.134771	0.315896	0.774582	-0.096782	-0.32551	0.131946	0.406192	0.993025	-1.75961	-3.66824	0.149025	0.070693	0.990282	-0.107775	-0.35492	0.139371	0.391992	0.992818	0.00212852	-0.0112517	0.0155088	0.754761	0.920433
18	Cer(d16:1/23:0)	-0.0494469	-0.322198	0.223304	0.721861	0.946118	-0.0119998	-0.238364	0.214364	0.917093	0.993025	-1.48798	-3.37688	0.40093	0.122332	0.990282	-0.084633	-0.329224	0.159958	0.496937	0.992818	-0.00483532	-0.0180772	0.0084066	0.473458	0.844371
19	Cer(d16:1/24:0)	-0.112066	-0.387841	0.163709	0.42503	0.81565	-0.0725548	-0.301428	0.156319	0.533688	0.993025	-1.76217	-3.67201	0.147679	0.0704637	0.990282	-0.029976	-0.277278	0.217326	0.811869	0.992818	-0.000464391	-0.0138531	0.0129243	0.945697	0.988418
20	Cer(d16:1/24:1)	0.055619	-0.21998	0.331218	0.691911	0.937896	-0.0228711	-0.251598	0.205856	0.844336	0.993025	-1.07757	-2.9862	0.831056	0.267869	0.990282	-0.00673635	-0.253881	0.240408	0.957315	0.999302	0.000358891	-0.0130213	0.0137391	0.957994	0.988431
21	Cer(d17:1/16:0)	0.176738	-0.132258	0.485734	0.261658	0.750087	0.0771596	-0.179285	0.333604	0.554698	0.993025	-0.308512	-2.44843	1.8314	0.777105	0.990282	0.0631437	-0.21395	0.340237	0.654559	0.992818	-0.00851951	-0.0235211	0.00648209	0.265062	0.74611
22	Cer(d17:1/18:0)	0.187188	-0.0993688	0.473745	0.199947	0.725448	0.062835	-0.174987	0.300657	0.60393	0.993025	-0.162373	-2.14689	1.82214	0.872356	0.990282	-0.22171	-0.478681	0.0352609	0.0906763	0.992818	0.00364883	-0.0102633	0.017561	0.606581	0.877957
23	Cer(d17:1/20:0)	-0.0433959	-0.32444	0.237649	0.761739	0.952321	0.0275083	-0.205739	0.260755	0.816861	0.993025	-0.720305	-2.66664	1.22603	0.467511	0.990282	-0.255909	-0.507936	-0.00388089	0.0465879	0.992818	-0.00158815	-0.0152327	0.0120564	0.819214	0.938009
24	Cer(d17:1/22:0)	-0.242795	-0.52726	0.0416699	0.094186	0.650738	-0.0691955	-0.305281	0.16689	0.564986	0.993025	-1.13575	-3.10578	0.834279	0.257896	0.990282	-0.2502	-0.505295	0.00489557	0.0545444	0.992818	-0.00372828	-0.0175389	0.0100823	0.596085	0.874128
25	Cer(d17:1/23:0)	-0.041393	-0.318523	0.235737	0.769301	0.952321	0.00327007	-0.226728	0.233268	0.977727	0.993025	-0.211421	-2.13065	1.70781	0.828744	0.990282	-0.0703068	-0.318824	0.178211	0.578586	0.992818	-0.00803465	-0.0214892	0.00541987	0.241253	0.723758
26	Cer(d17:1/24:0)	-0.115782	-0.39309	0.161526	0.412438	0.814354	-0.0213891	-0.251535	0.208757	0.855193	0.993025	-0.860094	-2.78056	1.06037	0.379338	0.990282	-0.0662441	-0.314921	0.182433	0.600955	0.992818	-0.00539319	-0.0188563	0.00806996	0.431639	0.838294
27	Cer(d17:1/24:1)	-0.151209	-0.42001	0.117592	0.269605	0.750626	0.0960983	-0.126987	0.319184	0.397778	0.993025	-0.760995	-2.62254	1.10055	0.422268	0.990282	-0.107031	-0.348079	0.134017	0.38343	0.992818	-0.00588322	-0.0189334	0.00716692	0.3762	0.818359
28	Cer(d18:1/14:0)	0.258611	-0.0280351	0.545256	0.0769116	0.650738	-0.0432586	-0.281154	0.194637	0.721053	0.993025	-1.84621	-3.83134	0.138921	0.0682625	0.990282	-0.112893	-0.369944	0.144158	0.388629	0.992818	0.0060042	-0.00791229	0.0199207	0.397038	0.823881
29	Cer(d18:1/16:0)	0.178476	-0.0881259	0.445077	0.189027	0.725448	0.018852	-0.202408	0.240112	0.867127	0.993025	-0.200196	-2.04651	1.64612	0.831391	0.990282	-0.081172	-0.320248	0.157904	0.505045	0.992818	0.00330394	-0.00963941	0.0162473	0.616237	0.877957
30	Cer(d18:1/17:0)	0.326597	0.00653955	0.646654	0.045516	0.598317	0.00356275	-0.262062	0.269187	0.978987	0.993025	0.637276	-1.57924	2.85379	0.572417	0.990282	-0.152158	-0.43917	0.134855	0.298118	0.992818	0.00314942	-0.0123892	0.018688	0.690649	0.892424
31	Cer(d18:1/18:0)	-0.0339209	-0.287826	0.219985	0.793065	0.952321	0.0393052	-0.171418	0.250029	0.714177	0.993025	0.180376	-1.57802	1.93877	0.840361	0.990282	-0.202688	-0.430379	0.0250024	0.0809103	0.992818	0.00193061	-0.0103964	0.0142576	0.758439	0.920433
32	Cer(d18:1/19:0)	-0.125665	-0.413537	0.162206	0.391498	0.805145	-0.00451385	-0.243426	0.234399	0.970405	0.993025	-0.753177	-2.74679	1.24044	0.458288	0.990282	-0.153485	-0.411635	0.104664	0.243314	0.992818	-0.00354093	-0.0175169	0.0104351	0.618868	0.877957
33	Cer(d18:1/20:0)	-0.153798	-0.405714	0.098118	0.230915	0.735677	-0.00665318	-0.215725	0.202419	0.950173	0.993025	-0.746817	-2.49143	0.997796	0.400739	0.990282	-0.229762	-0.455668	-0.00385519	0.0462306	0.992818	0.0014398	-0.0107906	0.0136702	0.817187	0.938009
34	Cer(d18:1/21:0)	-0.125171	-0.390152	0.139809	0.353817	0.793781	-0.0723105	-0.292225	0.147604	0.518572	0.993025	0.555023	-1.28007	2.39011	0.552637	0.990282	-0.142319	-0.379942	0.095303	0.239871	0.992818	-0.00446037	-0.017325	0.00840429	0.496072	0.853244
35	Cer(d18:1/22:0)	-0.26629	-0.531431	-0.00114893	0.0490192	0.621981	-0.0482372	-0.268285	0.171811	0.666887	0.993025	-1.20844	-3.04464	0.627766	0.196609	0.990282	-0.2403	-0.478066	-0.00253408	0.0476168	0.992818	0.00399396	-0.00887849	0.0168664	0.542415	0.867655
36	Cer(d18:1/23:0)	-0.108892	-0.364462	0.146678	0.402937	0.805145	0.0771561	-0.134949	0.289261	0.475142	0.993025	-0.502522	-2.27244	1.2674	0.577219	0.990282	-0.0451582	-0.274342	0.184025	0.698834	0.992818	-0.00676099	-0.0191688	0.00564681	0.284887	0.756463
37	Cer(d18:1/24:0)	-0.131639	-0.395685	0.132406	0.327813	0.774582	0.0438073	-0.175332	0.262946	0.694671	0.993025	-0.830606	-2.65922	0.998009	0.372603	0.990282	0.083724	-0.15306	0.320508	0.487575	0.992818	-0.00166101	-0.0144803	0.0111582	0.799163	0.931555
38	Cer(d18:1/24:1)	-0.176577	-0.414787	0.0616329	0.14592	0.714758	-0.0347593	-0.232457	0.162938	0.729917	0.993025	-0.617157	-2.26685	1.03254	0.462689	0.990282	-0.0231003	-0.236716	0.190515	0.831836	0.992818	0.00409257	-0.00747239	0.0156575	0.48722	0.848349
39	Cer(d18:1/26:0)	0.116216	-0.176344	0.408776	0.435498	0.81565	0.128292	-0.114512	0.371096	0.299728	0.993025	0.643153	-1.38294	2.66924	0.533137	0.990282	-0.139709	-0.402063	0.122645	0.295958	0.992818	-0.00915819	-0.0233618	0.00504543	0.20582	0.675021
40	Cer(d18:2/14:0)	0.118186	-0.153025	0.389397	0.392326	0.805145	0.170218	-0.0548675	0.395304	0.137968	0.993025	0.0960315	-1.78221	1.97427	0.920027	0.990282	0.0640438	-0.179166	0.307253	0.605139	0.992818	0.000460257	-0.0127069	0.0136274	0.945276	0.988418
41	Cer(d18:2/16:0)	0.217654	-0.0761265	0.511434	0.146134	0.714758	0.0711314	-0.172685	0.314948	0.566783	0.993025	-0.435244	-2.46978	1.5993	0.674449	0.990282	-0.0460149	-0.309463	0.217434	0.731625	0.992818	0.0121325	-0.00213035	0.0263954	0.095298	0.53822
42	Cer(d18:2/17:0)	0.0443624	-0.262492	0.351217	0.776501	0.952321	0.191041	-0.0636262	0.445709	0.141155	0.993025	2.30267	0.177589	4.42776	0.0337492	0.990282	0.00551236	-0.269661	0.280686	0.968622	0.999302	0.0114485	-0.00344911	0.0263461	0.131718	0.572753
43	Cer(d18:2/18:0)	0.00533548	-0.261393	0.272064	0.968667	0.992966	0.00780928	-0.213556	0.229175	0.944771	0.993025	0.152228	-1.69497	1.99942	0.871443	0.990282	-0.175949	-0.415139	0.0632405	0.149017	0.992818	0.0041715	-0.00877802	0.017121	0.527094	0.860213
44	Cer(d18:2/20:0)	-0.206925	-0.481378	0.0675278	0.139158	0.714758	-0.0161442	-0.24392	0.211632	0.889308	0.993025	-0.47902	-2.37971	1.42167	0.620715	0.990282	-0.311852	-0.557969	-0.0657356	0.0131155	0.992818	0.010072	-0.00325254	0.0233965	0.138144	0.586566
45	Cer(d18:2/21:0)	-0.158244	-0.429264	0.112776	0.251869	0.735677	-0.13381	-0.358737	0.0911177	0.243043	0.993025	0.131881	-1.74503	2.0088	0.890259	0.990282	-0.242033	-0.485071	0.0010054	0.0509517	0.992818	-0.00823015	-0.021388	0.00492772	0.219688	0.685671
46	Cer(d18:2/22:0)	-0.239806	-0.522799	0.0431876	0.0965649	0.650738	-0.0431236	-0.277988	0.191741	0.71845	0.993025	-0.647847	-2.60768	1.31199	0.516348	0.990282	-0.205334	-0.45911	0.0484408	0.112539	0.992818	0.0026447	-0.0110945	0.0163839	0.705453	0.903164
47	Cer(d18:2/23:0)	-0.180494	-0.458643	0.0976543	0.202932	0.725448	-0.0955126	-0.326356	0.135331	0.416666	0.993025	-0.646875	-2.57316	1.27941	0.509708	0.990282	-0.138885	-0.388316	0.110546	0.274503	0.992818	-0.00507679	-0.0185808	0.00842718	0.460487	0.839187
48	Cer(d18:2/24:0)	-0.157599	-0.446103	0.130906	0.283685	0.757436	-0.0135314	-0.25297	0.225907	0.911637	0.993025	-0.789257	-2.78726	1.20875	0.438061	0.990282	-0.0621346	-0.320852	0.196583	0.637245	0.992818	0.00233787	-0.0116689	0.0163446	0.743106	0.920433
49	Cer(d18:2/24:1)	-0.0970516	-0.358766	0.164663	0.466611	0.81565	0.0210167	-0.196188	0.238221	0.849307	0.993025	-0.213508	-2.02598	1.59896	0.81707	0.990282	-0.0576808	-0.292374	0.177013	0.629407	0.992818	0.00321256	-0.00949352	0.0159187	0.61959	0.877957
50	Cer(d18:2/26:0)	0.0314077	-0.250522	0.313337	0.826841	0.962501	0.0689224	-0.165059	0.302904	0.563038	0.993025	-1.3548	-3.30727	0.597664	0.173406	0.990282	-0.0688673	-0.321688	0.183954	0.592772	0.992818	-0.0106773	-0.0243648	0.00301021	0.126003	0.557872
51	Cer(d19:1/16:0)	0.0831471	-0.195426	0.36172	0.557867	0.868791	0.12546	-0.105735	0.356656	0.286869	0.993025	0.997835	-0.931387	2.92706	0.310037	0.990282	0.0197559	-0.230055	0.269567	0.876591	0.993897	-0.00592315	-0.0194477	0.00760141	0.389959	0.819077
52	Cer(d19:1/18:0)	-0.0125693	-0.281896	0.256758	0.926981	0.98691	0.0993616	-0.124161	0.322884	0.382891	0.993025	0.492397	-1.37279	2.35759	0.604228	0.990282	-0.122821	-0.364341	0.118699	0.318228	0.992818	-0.00326414	-0.0163398	0.00981154	0.624031	0.879781
53	Cer(d19:1/20:0)	-0.12777	-0.40448	0.14894	0.364747	0.797422	0.155018	-0.0746312	0.384668	0.185376	0.993025	0.296141	-1.62018	2.21246	0.761549	0.990282	-0.144527	-0.392667	0.103614	0.253043	0.992818	0.00223098	-0.0112031	0.0156651	0.744357	0.920433
54	Cer(d19:1/22:0)	0.000593921	-0.283408	0.284596	0.996723	0.996723	0.141334	-0.0943675	0.377035	0.239323	0.993025	-0.103009	-2.06983	1.86381	0.918087	0.990282	-0.0748961	-0.329576	0.179784	0.56368	0.992818	-0.00780397	-0.0215921	0.00598416	0.266675	0.746417
55	Cer(d19:1/23:0)	-0.0112486	-0.295835	0.273338	0.938133	0.990474	0.145511	-0.0906752	0.381698	0.226691	0.993025	-0.238409	-2.20928	1.73246	0.812243	0.990282	-0.0068385	-0.262043	0.248366	0.958035	0.999302	-0.00828894	-0.0221055	0.00552757	0.239089	0.723758
56	Cer(d19:1/24:0)	0.0632662	-0.219569	0.346102	0.660512	0.92373	0.181392	-0.0533417	0.416125	0.129588	0.993025	-0.0590363	-2.01778	1.89971	0.952805	0.992558	0.10321	-0.150424	0.356844	0.424394	0.992818	-0.00692942	-0.0206609	0.00680209	0.321945	0.778706
57	Cer(d19:1/24:1)	0.0608378	-0.210774	0.33245	0.660082	0.92373	0.1845	-0.0409183	0.409919	0.108452	0.993025	0.714613	-1.1664	2.59563	0.455779	0.990282	0.0860185	-0.157551	0.329588	0.488104	0.992818	-0.00730967	-0.0204963	0.00587695	0.276646	0.748397
58	Cer(d19:1/26:0)	0.26358	-0.0461626	0.573322	0.0951707	0.650738	0.12825	-0.128814	0.385314	0.327468	0.993025	1.02136	-1.12372	3.16644	0.350001	0.990282	-0.110969	-0.388732	0.166794	0.43288	0.992818	-0.0168612	-0.031899	-0.00182338	0.0280528	0.52089
59	Cer(d20:1/22:0)	-0.24342	-0.532712	0.0458718	0.0989241	0.654421	0.0246068	-0.215485	0.264698	0.840501	0.993025	-3.0099	-5.01336	-1.00644	0.00330767	0.990282	-0.347544	-0.606968	-0.0881203	0.00874703	0.992818	0.00495168	-0.00909328	0.0189966	0.488842	0.848349
60	Cer(d20:1/23:0)	-0.112125	-0.397104	0.172854	0.439886	0.81565	0.0831501	-0.153362	0.319662	0.490064	0.993025	-0.561946	-2.53553	1.41164	0.576134	0.990282	-0.104636	-0.360192	0.15092	0.421532	0.992818	0.00196555	-0.01187	0.0158011	0.780275	0.924594
61	Cer(d20:1/24:0)	-0.0536898	-0.339489	0.232109	0.712224	0.946118	0.231242	-0.00595074	0.468434	0.0560083	0.993025	-0.235058	-2.21432	1.74421	0.815605	0.990282	-0.0402651	-0.296556	0.216026	0.757706	0.992818	-0.00970504	-0.0235804	0.00417033	0.169998	0.629457
62	Cer(d20:1/24:1)	0.0186813	-0.246719	0.284082	0.890066	0.981783	0.272632	0.052368	0.492895	0.0153712	0.993025	-0.354931	-2.19293	1.48307	0.704558	0.990282	0.00906634	-0.228933	0.247066	0.94037	0.999302	-0.00057939	-0.0134645	0.0123057	0.929639	0.984469
63	Cer(d20:1/26:0)	0.231399	-0.0846535	0.547451	0.15093	0.714758	-0.104777	-0.367078	0.157523	0.432943	0.993025	0.246872	-1.94191	2.43565	0.82472	0.990282	0.103927	-0.179494	0.387348	0.471601	0.992818	-0.00762987	-0.022974	0.00771428	0.329073	0.78226
64	Cer(m18:0/20:0)	0.153218	-0.0984649	0.404901	0.232244	0.735677	0.077281	-0.131598	0.28616	0.467633	0.993025	-0.401335	-2.14433	1.34166	0.651194	0.990282	0.000100546	-0.225597	0.225798	0.999302	0.999302	0.0128282	0.000609189	0.0250473	0.0396591	0.52117
65	Cer(m18:0/22:0)	0.205235	-0.0535731	0.464044	0.119864	0.686817	0.135254	-0.0795387	0.350046	0.21661	0.993025	-0.731862	-2.52421	1.06048	0.422802	0.990282	0.022565	-0.209522	0.254653	0.848589	0.992818	0.0113821	-0.00118292	0.0239471	0.075725	0.53822
66	Cer(m18:0/23:0)	0.218672	-0.0392368	0.47658	0.0963785	0.650738	0.12687	-0.0871758	0.340915	0.244771	0.993025	-0.287092	-2.0732	1.49902	0.752292	0.990282	0.0790689	-0.152211	0.310349	0.502103	0.992818	0.00638652	-0.00613478	0.0189078	0.316785	0.778197
67	Cer(m18:0/24:0)	0.219959	-0.0376231	0.477541	0.0940236	0.650738	0.0971094	-0.116665	0.310884	0.372567	0.993025	-0.607392	-2.39125	1.17646	0.503829	0.990282	0.116089	-0.114898	0.347077	0.323922	0.992818	0.0102583	-0.00224717	0.0227638	0.107668	0.53822
68	Cer(m18:0/24:1)	0.246279	-0.00545466	0.498012	0.0551554	0.650738	0.117039	-0.0918816	0.32596	0.271586	0.993025	-0.303389	-2.04674	1.43996	0.732566	0.990282	0.103869	-0.121874	0.329612	0.366438	0.992818	0.00997697	-0.00224455	0.0221985	0.109373	0.53822
69	Cer(m18:1/18:0)	0.302745	0.0610937	0.544396	0.0141734	0.55448	0.114913	-0.0856404	0.315466	0.260823	0.993025	-0.454143	-2.12767	1.21938	0.594166	0.990282	0.105608	-0.111093	0.32231	0.33879	0.992818	0.0100518	-0.00168021	0.0217839	0.0929356	0.53822
70	Cer(m18:1/20:0)	0.224568	-0.0190416	0.468178	0.0707188	0.650738	0.133595	-0.0685841	0.335773	0.194811	0.993025	-0.20082	-1.88791	1.48627	0.815189	0.990282	0.00232212	-0.216136	0.22078	0.983347	0.999302	0.0147028	0.00287568	0.0265299	0.0149327	0.52089
71	Cer(m18:1/22:0)	0.202793	-0.064689	0.470275	0.136974	0.714758	0.0746366	-0.147354	0.296627	0.509204	0.993025	-1.03884	-2.89125	0.813574	0.271078	0.990282	0.0616722	-0.178193	0.301538	0.613683	0.992818	0.0125002	-0.000485922	0.0254863	0.0591756	0.52117
72	Cer(m18:1/23:0)	0.298164	0.0305508	0.565777	0.0290566	0.55448	0.10422	-0.11788	0.32632	0.357013	0.993025	-0.109824	-1.96315	1.7435	0.907365	0.990282	0.0513974	-0.188586	0.29138	0.6741	0.992818	0.00442107	-0.0085714	0.0174135	0.504099	0.853739
73	Cer(m18:1/24:0)	0.255438	-0.0230658	0.533943	0.0721486	0.650738	0.105789	-0.12535	0.336928	0.368975	0.993025	-0.811851	-2.7406	1.1169	0.408646	0.990282	0.107392	-0.142358	0.357142	0.398622	0.992818	0.00889071	-0.00463052	0.0224119	0.197004	0.66009
74	Cer(m18:1/24:1)	0.359738	0.104225	0.615251	0.00588101	0.55448	0.147157	-0.0648998	0.359214	0.17337	0.993025	0.235933	-1.53359	2.00545	0.793466	0.990282	0.114574	-0.114557	0.343706	0.326371	0.992818	0.00769062	-0.00471437	0.0200956	0.223787	0.692844
75	Cer1P(d18:1/16:0)	0.181762	-0.0710952	0.434618	0.158488	0.725448	0.0433648	-0.166488	0.253218	0.684926	0.993025	-1.50627	-3.2574	0.244858	0.0916543	0.990282	0.0339667	-0.192784	0.260717	0.768649	0.992818	-0.00352107	-0.0157971	0.00875498	0.573336	0.873572
76	HexCer(d16:1/18:0)	-0.0513758	-0.360828	0.258076	0.744426	0.946118	-0.0987917	-0.355615	0.158031	0.450156	0.993025	-0.815193	-2.95826	1.32788	0.455213	0.990282	-0.143941	-0.421444	0.133561	0.308654	0.992818	-0.00579325	-0.020817	0.00923047	0.449052	0.839187
77	HexCer(d16:1/20:0)	-0.0949413	-0.403081	0.213199	0.54523	0.863002	-0.0903621	-0.346096	0.165372	0.487876	0.993025	-1.92892	-4.06291	0.205064	0.0763554	0.990282	-0.101859	-0.378185	0.174467	0.469272	0.992818	-0.00112111	-0.0160811	0.0138389	0.883007	0.96396
78	HexCer(d16:1/22:0)	0.0264262	-0.262996	0.315848	0.857706	0.96925	-0.169886	-0.410085	0.0703139	0.165279	0.993025	-1.88775	-3.89211	0.116605	0.0648435	0.990282	-0.140932	-0.400472	0.118609	0.286562	0.992818	-0.00132333	-0.0153746	0.0127279	0.853281	0.953015
79	HexCer(d16:1/24:0)	0.189545	-0.089462	0.468552	0.182574	0.725448	-0.0570344	-0.28859	0.174521	0.628656	0.993025	-2.20233	-4.13456	-0.270106	0.0255697	0.990282	0.0236298	-0.226571	0.27383	0.852873	0.992818	-0.00202421	-0.0155698	0.0115214	0.769191	0.920433
80	HexCer(d18:1/16:0)	0.134765	-0.148587	0.418118	0.350538	0.79101	-0.0929425	-0.328105	0.14222	0.437825	0.993025	-1.12965	-3.09197	0.832675	0.258594	0.990282	-0.120928	-0.375026	0.133169	0.350231	0.992818	-0.00462886	-0.0183855	0.00912775	0.508867	0.854208
81	HexCer(d18:1/18:0)	0.0704658	-0.214109	0.35504	0.626834	0.90397	0.0540982	-0.182078	0.290275	0.652888	0.993025	-0.489416	-2.4602	1.48137	0.625836	0.990282	-0.151087	-0.40628	0.104106	0.245307	0.992818	-0.0012774	-0.0150933	0.0125385	0.85593	0.953223
82	HexCer(d18:1/20:0)	-0.0950823	-0.37013	0.179965	0.497341	0.837914	-0.11235	-0.340619	0.11592	0.334025	0.993025	-1.22811	-3.13292	0.676699	0.205846	0.990282	-0.276769	-0.523419	-0.0301192	0.0279331	0.992818	0.00656684	-0.00678657	0.0199202	0.334423	0.784209
83	HexCer(d18:1/22:0)	0.123329	-0.161901	0.40856	0.396013	0.805145	0.0264668	-0.210254	0.263188	0.826224	0.993025	-1.00314	-2.97847	0.972185	0.31889	0.990282	-0.117723	-0.373504	0.138059	0.366305	0.992818	0.00296121	-0.0108866	0.016809	0.674574	0.890413
84	HexCer(d18:1/24:0)	0.169681	-0.115691	0.455052	0.243285	0.735677	0.0397851	-0.197053	0.276623	0.741512	0.993025	-1.33512	-3.31143	0.641182	0.185023	0.990282	-0.0682632	-0.324171	0.187644	0.600459	0.992818	-0.00919815	-0.0230528	0.00465646	0.192708	0.656797
85	HexCer(d18:1/24:1)	0.106012	-0.169061	0.381084	0.4493	0.81565	-0.0148711	-0.243161	0.213419	0.898215	0.993025	-1.71626	-3.62124	0.188719	0.0773243	0.990282	0.0211893	-0.225483	0.267861	0.866049	0.993391	-0.00346412	-0.0168187	0.00989048	0.610538	0.877957
86	HexCer(d18:2/18:0)	0.109122	-0.169902	0.388146	0.442639	0.81565	0.0343636	-0.197206	0.265933	0.770755	0.993025	0.200889	-1.73145	2.13323	0.838241	0.990282	0.0250442	-0.225171	0.27526	0.844185	0.992818	-0.0032781	-0.0168245	0.0102683	0.634688	0.881954
87	HexCer(d18:2/20:0)	0.0167212	-0.252844	0.286287	0.903052	0.981783	-0.0344191	-0.258139	0.189301	0.762578	0.993025	-0.392363	-2.25921	1.47448	0.679839	0.990282	-0.252865	-0.494599	-0.0111312	0.040379	0.992818	0.00319332	-0.00989393	0.0162806	0.631875	0.88121
88	HexCer(d18:2/22:0)	-0.0174774	-0.296838	0.261883	0.902225	0.981783	-0.114913	-0.346763	0.116936	0.330642	0.993025	-1.30556	-3.24024	0.629117	0.185507	0.990282	-0.184658	-0.435176	0.0658598	0.148191	0.992818	0.00515104	-0.00841177	0.0187138	0.455917	0.839187
89	HexCer(d18:2/24:0)	0.084251	-0.192547	0.361049	0.55011	0.863662	-0.00576674	-0.23549	0.223956	0.960685	0.993025	-1.07888	-2.99581	0.838058	0.269367	0.990282	-0.035048	-0.283268	0.213172	0.781583	0.992818	0.000557826	-0.0128806	0.0139962	0.935035	0.987545
90	Hex2Cer(d16:1/16:0)	0.0663606	-0.217852	0.350573	0.646628	0.917735	-0.129862	-0.365738	0.106015	0.279926	0.993025	-1.66727	-3.63555	0.301009	0.0966904	0.990282	-0.0489268	-0.303796	0.205942	0.706219	0.992818	-0.00295318	-0.0167516	0.0108452	0.674311	0.890413
91	Hex2Cer(d16:1/24:1)	0.0161229	-0.266322	0.298568	0.91075	0.981783	-0.139395	-0.373804	0.0950144	0.243231	0.993025	-0.412507	-2.36855	1.54353	0.678812	0.990282	0.0326125	-0.220671	0.285896	0.800397	0.992818	-0.00323875	-0.0169513	0.0104738	0.642826	0.885133
92	Hex2Cer(d18:1/16:0)	0.013762	-0.256001	0.283525	0.920204	0.986479	-0.122418	-0.346301	0.101466	0.283219	0.993025	-1.22084	-3.08905	0.647367	0.199775	0.990282	0.0470751	-0.194836	0.288986	0.702387	0.992818	-0.00278832	-0.0158851	0.0103085	0.675923	0.890413
93	Hex2Cer(d18:1/18:0)	-0.0627554	-0.345083	0.219572	0.662514	0.92373	-0.150732	-0.385044	0.0835797	0.206862	0.993025	-0.524278	-2.4795	1.43095	0.598559	0.990282	0.0638383	-0.18934	0.317017	0.620545	0.992818	-0.00368911	-0.017396	0.0100177	0.597193	0.874128
94	Hex2Cer(d18:1/20:0)	-0.0815613	-0.359742	0.19662	0.564853	0.872599	-0.105233	-0.336104	0.125637	0.370938	0.993025	-1.01773	-2.94423	0.908784	0.299822	0.990282	-0.0503853	-0.299845	0.199075	0.69167	0.992818	0.00223532	-0.0112702	0.0157409	0.745184	0.920433
95	Hex2Cer(d18:1/22:0)	-0.13242	-0.398024	0.133184	0.327799	0.774582	-0.0474496	-0.267882	0.172983	0.672543	0.993025	-1.04208	-2.88149	0.797322	0.266218	0.990282	0.0375686	-0.200613	0.27575	0.756774	0.992818	0.00285542	-0.0100395	0.0157503	0.663713	0.890413
96	Hex2Cer(d18:1/24:0)	0.0212934	-0.248684	0.291271	0.876919	0.981783	-0.0652633	-0.289325	0.158799	0.567405	0.993025	-0.916809	-2.78651	0.952886	0.33582	0.990282	0.0919493	-0.150154	0.334053	0.455915	0.992818	0.00035055	-0.0127567	0.0134578	0.958116	0.988431
97	Hex2Cer(d18:1/24:1)	-0.130642	-0.409852	0.148567	0.358396	0.797422	-0.179009	-0.410733	0.0527155	0.129711	0.993025	-1.10793	-3.04156	0.825707	0.260825	0.990282	0.148341	-0.102041	0.398724	0.24498	0.992818	0.00532714	-0.00822833	0.0188826	0.440423	0.839187
98	Hex2Cer(d18:2/16:0)	-0.0768746	-0.344459	0.19071	0.572714	0.872599	-0.134274	-0.35635	0.0878024	0.235434	0.993025	-0.516485	-2.36961	1.33664	0.584229	0.990282	0.0531125	-0.186845	0.29307	0.66385	0.992818	0.00271957	-0.0102715	0.0157107	0.681039	0.890413
99	Hex2Cer(d18:2/24:1)	-0.135153	-0.407616	0.13731	0.330248	0.774582	-0.121484	-0.347609	0.104641	0.2917	0.993025	-0.203835	-2.09074	1.68307	0.83201	0.990282	0.080256	-0.164076	0.324588	0.519005	0.992818	0.00214009	-0.0110878	0.015368	0.750728	0.920433
100	Hex3Cer(d18:1/16:0)	0.305002	0.056992	0.553013	0.016039	0.55448	-0.00159051	-0.207421	0.20424	0.987893	0.993025	-1.12233	-2.8399	0.595237	0.199803	0.990282	0.0515747	-0.17083	0.273979	0.648876	0.992818	-0.00186457	-0.0139053	0.0101762	0.761073	0.920433
101	Hex3Cer(d18:1/18:0)	0.0288433	-0.239606	0.297293	0.832902	0.963063	-0.111089	-0.333883	0.111705	0.327744	0.993025	-1.85424	-3.71335	0.00487088	0.050601	0.990282	-0.0553663	-0.296099	0.185367	0.651569	0.992818	-0.00235538	-0.0153884	0.0106777	0.722693	0.911016
102	Hex3Cer(d18:1/20:0)	0.18129	-0.0897414	0.452322	0.189394	0.725448	-0.201022	-0.425959	0.0239151	0.0797308	0.993025	-0.857825	-2.73482	1.01917	0.369672	0.990282	0.0819555	-0.161093	0.325004	0.507967	0.992818	-0.00292942	-0.0160879	0.010229	0.662019	0.890413
103	Hex3Cer(d18:1/22:0)	0.0837843	-0.169689	0.337258	0.51637	0.843345	-0.123572	-0.333937	0.0867924	0.249013	0.993025	-0.362873	-2.11827	1.39253	0.684819	0.990282	-0.0312382	-0.258541	0.196065	0.787269	0.992818	0.00134749	-0.0109585	0.0136535	0.829755	0.938933
104	Hex3Cer(d18:1/24:0)	0.11647	-0.154929	0.38787	0.399555	0.805145	-0.140866	-0.366108	0.0843766	0.219759	0.993025	-0.965977	-2.84552	0.913567	0.313112	0.990282	0.0310715	-0.212307	0.27445	0.802053	0.992818	-0.00396292	-0.0171392	0.00921337	0.554856	0.868173
105	Hex3Cer(d18:1/24:1)	0.00790894	-0.253448	0.269266	0.952615	0.992966	-0.128709	-0.345616	0.0881989	0.244249	0.993025	-0.186603	-1.9966	1.62339	0.83957	0.990282	-0.0062848	-0.240657	0.228088	0.958005	0.999302	0.00666219	-0.00602653	0.0193509	0.30278	0.774931
106	GM3(d18:1/16:0)	0.141493	-0.112518	0.395505	0.274308	0.755646	-0.102916	-0.313727	0.107895	0.337953	0.993025	-0.578518	-2.33764	1.18061	0.518501	0.990282	0.0169666	-0.210819	0.244752	0.883714	0.993897	-0.00147809	-0.0138102	0.010854	0.813934	0.938009
107	GM3(d18:1/18:0)	0.185914	-0.0818785	0.453706	0.173187	0.725448	-0.153015	-0.375264	0.0692331	0.176774	0.993025	-0.396123	-2.25069	1.45844	0.674927	0.990282	-0.0988181	-0.338962	0.141326	0.419212	0.992818	-0.000870428	-0.0138716	0.0121307	0.895405	0.972905
108	GM3(d18:1/20:0)	-0.384147	-0.695748	-0.0725458	0.0157825	0.55448	0.00425467	-0.254352	0.262861	0.974227	0.993025	-1.31947	-3.47742	0.838488	0.230206	0.990282	-0.090011	-0.36944	0.189418	0.527108	0.992818	0.0132484	-0.00187963	0.0283765	0.0859427	0.53822
109	GM3(d18:1/22:0)	-0.232554	-0.530238	0.0651305	0.125455	0.693589	-0.0618146	-0.308871	0.185242	0.623239	0.993025	-1.04774	-3.10932	1.01383	0.318521	0.990282	-0.0950814	-0.362031	0.171868	0.484394	0.992818	0.0106639	-0.00378852	0.0251163	0.147776	0.600159
110	GM3(d18:1/24:0)	-0.171599	-0.451187	0.107989	0.228449	0.735677	0.0802866	-0.151751	0.312325	0.496952	0.993025	-1.24358	-3.17983	0.692676	0.207595	0.990282	0.0876807	-0.163041	0.338402	0.492355	0.992818	0.00379486	-0.00977897	0.0173687	0.583068	0.873572
111	GM3(d18:1/24:1)	-0.171868	-0.464252	0.120517	0.248695	0.735677	0.00526689	-0.237391	0.247925	0.966003	0.993025	-2.69785	-4.72273	-0.672981	0.00911912	0.990282	0.12109	-0.141107	0.383287	0.364662	0.992818	0.00671906	-0.00747605	0.0209142	0.352844	0.807991
112	GM1(d18:1/16:0)	0.0358031	-0.241267	0.312873	0.799697	0.952321	-0.156306	-0.386255	0.0736423	0.182324	0.993025	-2.04733	-3.96615	-0.128514	0.0365562	0.990282	0.0791028	-0.169361	0.327567	0.531936	0.992818	0.000889933	-0.0125617	0.0143415	0.896636	0.972905
113	Sulfatide (d18:1:/16:0(OH))	0.0492362	-0.213939	0.312411	0.713356	0.946118	0.0594982	-0.158918	0.277915	0.592756	0.993025	-0.693619	-2.5162	1.12897	0.454997	0.990282	0.0382271	-0.197776	0.27423	0.750442	0.992818	-0.00353289	-0.0163099	0.00924411	0.587207	0.873572
114	Sulfatide (d18:1:/16:0)	0.184688	-0.0886132	0.457988	0.184892	0.725448	-0.0253186	-0.252139	0.201502	0.826502	0.993025	-1.24726	-3.13997	0.645448	0.196023	0.990282	-0.0236029	-0.268686	0.221481	0.850006	0.992818	-0.00240558	-0.0156742	0.010863	0.721847	0.911016
115	Sulfatide (d18:1:/24:0(OH))	0.241651	-0.0598675	0.543169	0.115981	0.686817	0.0544763	-0.195762	0.304715	0.669051	0.993025	-0.766692	-2.85482	1.32143	0.471023	0.990282	0.0941841	-0.176203	0.364572	0.494068	0.992818	-0.00308943	-0.017728	0.0115491	0.678584	0.890413
116	Sulfatide (d18:1:/24:0)	0.189951	-0.0817557	0.461658	0.170205	0.725448	0.0617795	-0.163718	0.287277	0.590636	0.993025	0.557251	-1.32442	2.43892	0.560943	0.990282	0.0464738	-0.19718	0.290128	0.708017	0.992818	-0.00363044	-0.0168217	0.00956079	0.588949	0.873572
117	Sulfatide (d18:1:/24:1(OH))	0.0355611	-0.258691	0.329814	0.812417	0.955259	-0.0633007	-0.307509	0.180908	0.610796	0.993025	-0.995596	-3.03341	1.04221	0.337586	0.990282	0.0185923	-0.24528	0.282464	0.889957	0.996854	-0.00801293	-0.0222987	0.00627286	0.270994	0.746439
118	Sulfatide (d18:1:/24:1)	0.147138	-0.119489	0.413765	0.278795	0.755646	0.0107376	-0.210544	0.232019	0.924087	0.993025	-1.6586	-3.5051	0.187888	0.0782091	0.990282	0.00109562	-0.238003	0.240194	0.992821	0.999302	-0.00327583	-0.0162204	0.00966876	0.619273	0.877957
119	SM(34:3)	0.112883	-0.135065	0.360831	0.371507	0.797422	0.0710219	-0.134757	0.276801	0.498034	0.993025	-0.142589	-1.85972	1.57454	0.87047	0.990282	0.000512574	-0.221836	0.222861	0.996388	0.999302	-0.00267648	-0.0147142	0.00936124	0.662425	0.890413
120	SM(35:2) (b)	0.342385	0.0979528	0.586817	0.00613613	0.55448	0.0600642	-0.142797	0.262926	0.561024	0.993025	-0.535917	-2.2287	1.15687	0.53423	0.990282	-0.0859531	-0.305149	0.133242	0.441422	0.992818	-0.00522968	-0.0170967	0.00663737	0.387008	0.819077
121	SM(37:1)	0.0419287	-0.225229	0.309086	0.75795	0.951044	-0.0210513	-0.242773	0.20067	0.852101	0.993025	0.516392	-1.33378	2.36656	0.583696	0.990282	-0.113566	-0.353141	0.126009	0.352137	0.992818	-0.00327993	-0.0162503	0.00969042	0.619531	0.877957
122	SM(37:2)	0.138167	-0.128408	0.404741	0.309027	0.774582	0.0171765	-0.204061	0.238414	0.878828	0.993025	0.457617	-1.38851	2.30375	0.626471	0.990282	-0.146954	-0.386006	0.0920979	0.227709	0.992818	-0.000383645	-0.0133257	0.0125584	0.953581	0.988418
123	SM(38:3) (a)	0.0260841	-0.259781	0.311949	0.857799	0.96925	-0.0269189	-0.264166	0.210328	0.82369	0.993025	0.697414	-1.28231	2.67713	0.489188	0.990282	0.0976249	-0.158725	0.353975	0.454691	0.992818	0.00819227	-0.0056863	0.0220708	0.246717	0.731643
124	SM(38:3) (b)	0.0593517	-0.221477	0.34018	0.678156	0.927509	-0.0107525	-0.24382	0.222315	0.927816	0.993025	1.8171	-0.127738	3.76195	0.0670001	0.990282	-0.0824169	-0.334251	0.169417	0.520537	0.992818	0.000110717	-0.0135233	0.0137448	0.987277	0.993708
125	SM(40:3) (a)	0.161115	-0.10627	0.428499	0.237039	0.735677	-0.0896189	-0.311529	0.132291	0.427898	0.993025	1.10161	-0.750128	2.95335	0.24304	0.990282	0.101562	-0.138216	0.34134	0.405709	0.992818	0.000438945	-0.0125424	0.0134203	0.94706	0.988418
126	SM(40:3) (b)	0.247316	-0.0141314	0.508764	0.0636825	0.650738	0.0746906	-0.142292	0.291674	0.499171	0.993025	0.276234	-1.53439	2.08686	0.764503	0.990282	-0.0199932	-0.254447	0.214461	0.867015	0.993391	-0.0105046	-0.0231977	0.00218855	0.104591	0.53822
127	SM(41:0)	0.248614	-0.0268391	0.524068	0.0767916	0.650738	0.0923945	-0.136212	0.321001	0.427543	0.993025	0.273437	-1.63418	2.18106	0.778356	0.990282	0.045813	-0.201201	0.292827	0.715727	0.992818	0.00313039	-0.0102427	0.0165035	0.645794	0.886249
128	SM(41:1) (a)	0.318735	0.0435284	0.593941	0.0232986	0.55448	0.206226	-0.022175	0.434628	0.0766782	0.993025	0.623696	-1.28221	2.5296	0.520566	0.990282	0.0220187	-0.224773	0.268811	0.860925	0.993391	-0.00491737	-0.0182785	0.00844373	0.469974	0.840898
129	SM(43:1)	0.277769	0.024441	0.531098	0.0316948	0.584089	0.249313	0.0390689	0.459558	0.0202117	0.993025	0.829836	-0.924559	2.58423	0.353181	0.990282	0.0968735	-0.1303	0.324047	0.402545	0.992818	-0.00626731	-0.0185663	0.00603164	0.317232	0.778197
130	SM(43:2) (b)	0.269089	0.0199453	0.518232	0.0343275	0.598317	0.13026	-0.0765112	0.337031	0.216409	0.993025	0.167098	-1.55831	1.89251	0.849176	0.990282	0.050536	-0.172884	0.273956	0.65695	0.992818	-0.0102349	-0.0223306	0.00186091	0.0970514	0.53822
131	SM(43:2) (c)	0.171777	-0.0710767	0.414631	0.165244	0.725448	0.0949314	-0.10662	0.296483	0.355219	0.993025	0.371432	-1.31042	2.05329	0.664555	0.990282	-0.0123916	-0.230172	0.205389	0.911036	0.999302	-0.00732281	-0.0191132	0.00446761	0.222952	0.692844
132	SM(44:1)	0.303482	0.0617956	0.545169	0.013955	0.55448	0.24963	0.0490478	0.450213	0.0148219	0.993025	0.364	-1.30977	2.03777	0.669372	0.990282	0.0272205	-0.189513	0.243954	0.805202	0.992818	0.000190371	-0.0115434	0.0119241	0.974584	0.993486
133	SM(44:2)	0.300874	0.0439229	0.557824	0.0218256	0.55448	0.135217	-0.0780336	0.348468	0.213436	0.993025	-0.361341	-2.14082	1.41814	0.690104	0.990282	0.0102794	-0.220142	0.240701	0.930193	0.999302	-0.00173959	-0.0142144	0.0107352	0.784221	0.924647
134	SM(44:3)	0.236549	-0.0266942	0.499793	0.0780937	0.650738	0.0248256	-0.193648	0.243299	0.823432	0.993025	-0.277126	-2.10019	1.54594	0.76533	0.990282	0.145188	-0.0908767	0.381253	0.227483	0.992818	0.00257166	-0.0102087	0.015352	0.692767	0.893669
135	SM(d16:1/19:0)	0.214777	-0.0558444	0.485398	0.119565	0.686817	0.164271	-0.0603255	0.388867	0.151347	0.993025	0.659497	-1.21466	2.53365	0.489666	0.990282	-0.0232978	-0.265978	0.219383	0.850474	0.992818	-0.00355669	-0.0166952	0.00958181	0.595066	0.874128
136	SM(d16:1/23:0)/SM(d17:1/22:0)	0.0537614	-0.194522	0.302044	0.670717	0.925084	-0.0811214	-0.287179	0.124936	0.439615	0.993025	-0.823502	-2.54296	0.895951	0.347185	0.990282	-0.117942	-0.34059	0.104707	0.298502	0.992818	-0.00175804	-0.013812	0.010296	0.774582	0.922349
137	SM(d16:1/24:1)	0.23268	-0.0296389	0.494999	0.0819972	0.650738	-0.0472349	-0.264941	0.170471	0.670096	0.993025	-0.355808	-2.17247	1.46085	0.700551	0.990282	0.082933	-0.152302	0.318169	0.48885	0.992818	-0.00010333	-0.0128388	0.0126321	0.987288	0.993708
138	SM(d17:1/14:0)	0.207896	-0.0443032	0.460095	0.105956	0.656077	0.0439666	-0.16534	0.253274	0.680007	0.993025	-0.842783	-2.58936	0.903789	0.343573	0.990282	0.00810751	-0.218053	0.234268	0.943879	0.999302	-0.00899652	-0.0212406	0.00324759	0.149482	0.600159
139	SM(d17:1/16:0)	0.208113	-0.0405647	0.45679	0.10076	0.655369	0.0231874	-0.183197	0.229572	0.825392	0.993025	-0.416864	-2.13905	1.30532	0.634597	0.990282	-0.0165562	-0.239559	0.206446	0.88409	0.993897	-0.00467927	-0.0167524	0.00739389	0.44674	0.839187
140	SM(d17:1/24:1)	0.174772	-0.0745414	0.424085	0.169043	0.725448	0.0239376	-0.182974	0.23085	0.820289	0.993025	-0.434896	-2.16148	1.29169	0.620913	0.990282	0.0283582	-0.195214	0.251931	0.803308	0.992818	-0.00687353	-0.0189775	0.00523048	0.265091	0.74611
141	SM(d18:0/14:0)	0.259254	0.0138344	0.504674	0.0384529	0.598317	0.0312727	-0.172408	0.234954	0.763044	0.993025	-0.903366	-2.60299	0.796259	0.296876	0.990282	0.200374	-0.0197069	0.420455	0.074255	0.992818	-0.00648576	-0.0184008	0.00542924	0.285384	0.756463
142	SM(d18:0/16:0)	0.11581	-0.149581	0.3812	0.39167	0.805145	0.167173	-0.0530819	0.387428	0.136539	0.993025	-0.67187	-2.5098	1.16606	0.472968	0.990282	0.0499733	-0.188017	0.287963	0.680118	0.992818	0.00571544	-0.00716911	0.0186	0.383895	0.819077
143	SM(d18:0/22:0)	0.271714	-0.00483881	0.548267	0.0541297	0.650738	0.10173	-0.127789	0.331249	0.384279	0.993025	0.304199	-1.61103	2.21943	0.755131	0.990282	0.0394578	-0.208542	0.287457	0.754725	0.992818	0.00366519	-0.00976129	0.0170917	0.591976	0.874128
144	SM(d18:1/14:0/SM(d16:1/16:0)	0.181358	-0.0651784	0.427894	0.149007	0.714758	-0.00553104	-0.210138	0.199076	0.957666	0.993025	-1.82781	-3.53517	-0.120456	0.035935	0.990282	0.0139106	-0.207172	0.234993	0.901667	0.999302	-0.00417876	-0.0161479	0.00779044	0.493082	0.850738
145	SM(d18:1/16:0)	0.190247	-0.0578958	0.438391	0.132621	0.714758	0.0879957	-0.117945	0.293937	0.401602	0.993025	-1.7477	-3.46619	-0.0292149	0.0462445	0.990282	0.0315005	-0.191023	0.254024	0.781036	0.992818	-0.00298627	-0.0150335	0.00906094	0.626469	0.880012
146	SM(d18:1/17:0)/SM(d17:1/18:0)	0.127383	-0.15007	0.404837	0.367483	0.797422	0.154637	-0.0756292	0.384904	0.187638	0.993025	-0.236652	-2.15812	1.68482	0.8089	0.990282	-0.134911	-0.383718	0.113897	0.28725	0.992818	-0.00622186	-0.0196921	0.00724836	0.36459	0.811526
147	SM(d18:1/18:0/SM(d16:1/20:0)	0.0658939	-0.18287	0.314658	0.603006	0.895829	-0.0261651	-0.232621	0.180291	0.80347	0.993025	-0.38269	-2.10547	1.34009	0.662719	0.990282	-0.16749	-0.39057	0.0555894	0.140812	0.992818	-0.000919551	-0.0129969	0.0111578	0.881151	0.963338
148	SM(d18:1/20:0)/SM(d16:1/22:0)	0.00379877	-0.244332	0.251929	0.976017	0.992966	-0.0532503	-0.259181	0.15268	0.611655	0.993025	-0.840095	-2.55849	0.878302	0.337269	0.990282	-0.137886	-0.360398	0.0846255	0.223996	0.992818	0.0066245	-0.0054221	0.0186711	0.280489	0.751205
149	SM(d18:1/22:0)/SM(d16:1/24:0)	-0.0111355	-0.260535	0.238264	0.930134	0.988906	0.00205627	-0.204928	0.20904	0.984436	0.993025	-0.76643	-2.49362	0.960758	0.383728	0.990282	-0.0780087	-0.301659	0.145642	0.493489	0.992818	0.00416392	-0.0079443	0.0162721	0.499585	0.853739
150	SM(d18:1/23:0)/SM(d17:1/24:0)	0.105668	-0.128004	0.33934	0.37473	0.797759	0.0573455	-0.136585	0.251276	0.561532	0.993025	-0.314431	-1.9327	1.30383	0.702818	0.990282	-0.0489075	-0.258454	0.160639	0.646757	0.992818	-0.000721303	-0.0120659	0.0106233	0.900641	0.972905
151	SM(d18:1/24:0)	0.0874029	-0.167988	0.342794	0.501656	0.840436	0.0726093	-0.139347	0.284565	0.501237	0.993025	-1.32128	-3.08996	0.447393	0.142809	0.990282	0.0255505	-0.203472	0.254573	0.826595	0.992818	0.00593977	-0.0064593	0.0183388	0.347068	0.801882
152	SM(d18:1/24:1)	0.11045	-0.129985	0.350885	0.367212	0.797422	-0.0474385	-0.246982	0.152105	0.640653	0.993025	0.0824241	-1.58268	1.74753	0.922565	0.990381	0.0935499	-0.122061	0.309161	0.394378	0.992818	0.00648027	-0.00519272	0.0181533	0.275932	0.748397
153	SM(d18:2/14:0)	0.0273296	-0.220684	0.275343	0.82869	0.962501	-0.0621523	-0.267985	0.143681	0.553287	0.993025	-1.02661	-2.7442	0.690973	0.240832	0.990282	0.0945192	-0.127887	0.316926	0.404141	0.992818	-9.90048e-05	-0.0121399	0.0119419	0.987118	0.993708
154	SM(d18:2/16:0)	0.152637	-0.0841633	0.389437	0.205959	0.725448	-0.0694134	-0.265941	0.127114	0.488053	0.993025	-0.639121	-2.27905	1.00081	0.444227	0.990282	0.0143747	-0.197977	0.226726	0.894251	0.998774	0.000475759	-0.0110208	0.0119723	0.935233	0.987545
155	SM(d18:2/17:0)	0.100703	-0.154562	0.355969	0.438663	0.81565	-0.00960291	-0.221455	0.202249	0.929074	0.993025	0.425454	-1.34236	2.19326	0.63654	0.990282	-0.0435188	-0.272429	0.185392	0.708928	0.992818	-0.00304964	-0.0154426	0.00934336	0.62898	0.880497
156	SM(d18:2/18:0)	-0.08646	-0.348611	0.175691	0.517303	0.843345	0.0669833	-0.150583	0.28455	0.545538	0.993025	-0.166634	-1.98213	1.64886	0.85697	0.990282	-0.0980005	-0.333086	0.137085	0.413166	0.992818	-0.000571174	-0.0132985	0.0121561	0.929777	0.984469
157	SM(d18:2/18:1)	0.00243037	-0.245642	0.250503	0.984651	0.992966	-0.00258072	-0.208463	0.203301	0.980362	0.993025	1.08047	-0.637525	2.79846	0.217181	0.990282	0.0212497	-0.20121	0.243709	0.851213	0.992818	-0.000847571	-0.0128913	0.0111962	0.890089	0.970322
158	SM(d18:2/20:0)	-0.0718724	-0.347876	0.204131	0.609151	0.901199	-0.00206588	-0.231129	0.226997	0.98587	0.993025	0.0859947	-1.82543	1.99742	0.929602	0.992558	-0.162187	-0.409694	0.0853207	0.198543	0.992818	0.00593544	-0.00746438	0.0193353	0.38458	0.819077
159	SM(d18:2/22:0)	-0.122526	-0.381247	0.136195	0.352593	0.793335	-0.0993112	-0.314031	0.115409	0.36395	0.993025	-1.25622	-3.04796	0.535519	0.16898	0.990282	-0.0533959	-0.285405	0.178613	0.65135	0.992818	0.00588228	-0.00667849	0.018443	0.35798	0.811014
160	SM(d18:2/23:0)	0.0628195	-0.188037	0.313676	0.62294	0.90397	-0.0463315	-0.254525	0.161862	0.662141	0.993025	-0.0759632	-1.81324	1.66131	0.931576	0.992558	-0.0630583	-0.288015	0.161898	0.58207	0.992818	-0.00230784	-0.0144868	0.00987111	0.709833	0.903164
161	SM(d18:2/24:0)	0.129588	-0.12318	0.382357	0.314304	0.774582	0.0235013	-0.186278	0.233281	0.825884	0.993025	-0.408676	-2.15919	1.34184	0.646669	0.990282	0.0141679	-0.212503	0.240839	0.902315	0.999302	0.000720097	-0.0115517	0.0129919	0.908265	0.975031
162	SM(d19:1/24:1)	0.293674	0.0191919	0.568155	0.0360439	0.598317	0.194109	-0.0336909	0.421909	0.09473	0.993025	1.16164	-0.739253	3.06253	0.230466	0.990282	0.13676	-0.109383	0.382902	0.275534	0.992818	-0.00218939	-0.0155153	0.0111365	0.746992	0.920433
163	PA(34:1)	0.0258152	-0.229223	0.280854	0.842449	0.965731	-0.101622	-0.313286	0.110042	0.346001	0.993025	-0.109964	-1.8762	1.65627	0.902696	0.990282	-0.0274951	-0.256202	0.201212	0.81338	0.992818	-0.00340585	-0.0157878	0.00897612	0.589153	0.873572
164	PA(36:1)	-0.0110568	-0.27867	0.256557	0.935337	0.990474	-0.0538424	-0.275943	0.168258	0.634081	0.993025	-1.17207	-3.02539	0.681257	0.214636	0.990282	-0.0610659	-0.301049	0.178918	0.617346	0.992818	-0.000118929	-0.0131114	0.0128736	0.985659	0.993708
165	PA(36:2)	-0.12556	-0.398627	0.147507	0.366756	0.797422	0.01975	-0.206876	0.246376	0.864122	0.993025	-1.08118	-2.97227	0.80991	0.261868	0.990282	0.0343034	-0.21057	0.279177	0.783259	0.992818	0.00218108	-0.0110762	0.0154383	0.746658	0.920433
166	PA(36:3)	-0.195911	-0.473836	0.0820137	0.166693	0.725448	0.0752465	-0.155411	0.305904	0.521864	0.993025	-0.936443	-2.86118	0.988291	0.339596	0.990282	-0.0315053	-0.280735	0.217725	0.803962	0.992818	0.00405805	-0.00943503	0.0175511	0.55487	0.868173
167	PA(36:4)	0.0592588	-0.211323	0.329841	0.667183	0.92373	0.0196119	-0.204952	0.244176	0.863836	0.993025	-0.909762	-2.78365	0.964122	0.340624	0.990282	-0.0592793	-0.301925	0.183366	0.631454	0.992818	-0.0121394	-0.0252761	0.000997164	0.0700343	0.526455
168	PA(40:6)	-0.0481912	-0.334206	0.237824	0.74076	0.946118	0.131384	-0.105988	0.368756	0.277366	0.993025	-0.644227	-2.62499	1.33653	0.523119	0.990282	0.0911643	-0.16532	0.347649	0.485302	0.992818	-0.010354	-0.0242399	0.00353182	0.143554	0.594175
169	PC(14:0_16:0)	0.164789	-0.087178	0.416755	0.199413	0.725448	-0.0608453	-0.26996	0.148269	0.567813	0.993025	-0.985779	-2.73074	0.759185	0.267573	0.990282	0.0865893	-0.139363	0.312541	0.451863	0.992818	-0.0116057	-0.0238386	0.000627105	0.0629082	0.52117
170	PC(14:0_20:4)	0.173541	-0.0810847	0.428167	0.181165	0.725448	-0.0645762	-0.275898	0.146745	0.548532	0.993025	0.312247	-1.45114	2.07563	0.72807	0.990282	-0.0494725	-0.277809	0.178864	0.670528	0.992818	-0.0112893	-0.0236513	0.00107263	0.0733795	0.535809
171	PC(14:0_22:6)	0.221763	-0.0325216	0.476047	0.0872529	0.650738	-0.103847	-0.314884	0.107191	0.334126	0.993025	-0.252229	-2.01324	1.50879	0.778521	0.990282	0.0393893	-0.188641	0.26742	0.734473	0.992818	-0.0118868	-0.0242322	0.000458561	0.0591035	0.52117
172	PC(15-MHDA_18:1)	0.255362	-0.0249226	0.535646	0.0740571	0.650738	0.0699118	-0.162704	0.302528	0.555139	0.993025	0.912261	-1.02881	2.85334	0.356268	0.990282	-0.0249881	-0.276334	0.226358	0.845221	0.992818	-0.0125192	-0.0261269	0.00108843	0.0712757	0.526455
173	PC(15-MHDA_18:2)	0.226773	-0.0771899	0.530736	0.143339	0.714758	0.00737257	-0.244895	0.25964	0.954235	0.993025	1.64082	-0.464235	3.74588	0.126299	0.990282	0.0516943	-0.220886	0.324274	0.709607	0.992818	-0.00967877	-0.024436	0.00507846	0.198142	0.660981
174	PC(15-MHDA_20:4)	0.148871	-0.122728	0.420471	0.282045	0.757436	0.0540636	-0.171344	0.279472	0.637688	0.993025	1.9643	0.08337	3.84522	0.0407085	0.990282	-0.139444	-0.383002	0.104114	0.261196	0.992818	-0.0134262	-0.0266122	-0.000240224	0.0459849	0.52117
175	PC(15-MHDA_22:6)	0.213093	-0.0717587	0.497944	0.142256	0.714758	-0.0224504	-0.258857	0.213956	0.85207	0.993025	0.744529	-1.22818	2.71723	0.458739	0.990282	-0.0383213	-0.293763	0.21712	0.768316	0.992818	-0.0134804	-0.0273098	0.00034899	0.0560453	0.52117
176	PC(15:0_20:3)	-0.0831454	-0.372058	0.205767	0.57205	0.872599	0.0138216	-0.225955	0.253598	0.909877	0.993025	0.0208907	-1.97994	2.02172	0.983642	0.99449	-0.101725	-0.360808	0.157358	0.440835	0.992818	-0.00927852	-0.023305	0.00474801	0.194324	0.656797
177	PC(15:0_20:4)	0.196516	-0.0660861	0.459118	0.142119	0.714758	0.023094	-0.194847	0.241035	0.835169	0.993025	1.79042	-0.0281939	3.60904	0.0536451	0.990282	-0.168322	-0.403811	0.0671673	0.160846	0.992818	-0.021987	-0.0347361	-0.00923778	0.000758268	0.500157
178	PC(15:0_22:6)	0.180183	-0.0760837	0.436449	0.167776	0.725448	-0.0774882	-0.290171	0.135195	0.474447	0.993025	0.370419	-1.40432	2.14516	0.681938	0.990282	-0.0209681	-0.250776	0.20884	0.857806	0.993391	-0.0158139	-0.0282555	-0.00337232	0.0128347	0.52089
179	PC(16:0_16:0)	0.118634	-0.124553	0.361822	0.338308	0.786338	-0.0937926	-0.295621	0.108036	0.361675	0.993025	-1.22579	-2.90995	0.458379	0.153352	0.990282	0.0435712	-0.174508	0.261651	0.694833	0.992818	-0.00966476	-0.0214714	0.00214187	0.108405	0.53822
180	PC(16:0_18:0)	-0.05056	-0.281816	0.180696	0.667715	0.92373	-0.0427281	-0.234654	0.149198	0.662017	0.993025	-1.08602	-2.68756	0.515515	0.183375	0.990282	-0.188549	-0.395928	0.0188309	0.0746554	0.992818	-0.00345179	-0.0146791	0.00777556	0.546099	0.867655
181	PC(16:0_18:1)	-0.0200573	-0.281826	0.241712	0.880402	0.981783	-0.128212	-0.345461	0.0890376	0.246815	0.993025	-0.164307	-1.97715	1.64854	0.858743	0.990282	0.018055	-0.216687	0.252797	0.879949	0.993897	-0.00103323	-0.013742	0.0116755	0.873159	0.962858
182	PC(16:0_18:2)	0.00505104	-0.293478	0.30358	0.973495	0.992966	0.0613236	-0.186434	0.309081	0.626978	0.993025	-0.602992	-2.67042	1.46443	0.566887	0.990282	-0.00633795	-0.274045	0.261369	0.96292	0.999302	-0.00913354	-0.023627	0.00535987	0.216253	0.683183
183	PC(16:0_18:3) (a)	0.0588942	-0.209854	0.327642	0.666986	0.92373	-0.0241393	-0.247181	0.198902	0.831701	0.993025	-1.07253	-2.93371	0.788652	0.258104	0.990282	0.0107165	-0.230284	0.251717	0.930418	0.999302	-0.0128936	-0.0259412	0.000153946	0.0527546	0.52117
184	PC(16:0_18:3) (b)	0.107522	-0.162402	0.377447	0.434225	0.81565	0.0626937	-0.161324	0.286712	0.582679	0.993025	-0.309818	-2.17915	1.55951	0.744849	0.990282	-0.0546124	-0.296668	0.187444	0.657764	0.992818	-0.0051604	-0.0182651	0.00794429	0.4395	0.839187
185	PC(16:0_20:3) (a)	-0.148621	-0.398126	0.100883	0.24244	0.735677	-0.0635037	-0.270575	0.143567	0.547102	0.993025	0.246281	-1.48163	1.97419	0.779574	0.990282	0.0381343	-0.18561	0.261878	0.737877	0.992818	0.000729899	-0.0113834	0.0128432	0.905812	0.973748
186	PC(16:0_20:3) (b)	-0.0156329	-0.287509	0.256243	0.910101	0.981783	-0.0226485	-0.248286	0.202989	0.843747	0.993025	0.0619489	-1.8209	1.94479	0.948486	0.992558	-0.107617	-0.351423	0.136189	0.386237	0.992818	-0.00384547	-0.0170449	0.00935397	0.567322	0.873572
187	PC(16:0_20:4)	-0.00162599	-0.288568	0.285316	0.991122	0.99627	0.00713259	-0.231009	0.245274	0.9531	0.993025	1.43448	-0.552699	3.42167	0.156741	0.990282	-0.14576	-0.403076	0.111557	0.266279	0.992818	-0.0119479	-0.0258788	0.00198302	0.0926055	0.53822
188	PC(16:0_20:5)	0.107021	-0.172584	0.386626	0.452407	0.81565	-0.0574747	-0.289527	0.174577	0.626748	0.993025	-0.59719	-2.53356	1.33918	0.544843	0.990282	-0.0379327	-0.288669	0.212804	0.766418	0.992818	-0.0103127	-0.0238874	0.00326196	0.136176	0.582323
189	PC(16:0_22:6)	0.089286	-0.185666	0.364238	0.523769	0.843345	-0.0883382	-0.316529	0.139852	0.447269	0.993025	-0.172401	-2.07655	1.73174	0.858889	0.990282	0.0242786	-0.222285	0.270843	0.84668	0.992818	-0.00891564	-0.0222644	0.00443311	0.190048	0.656162
190	PC(16:1_18:2)	0.25229	-0.0106786	0.51526	0.0600186	0.650738	-0.0594938	-0.277739	0.158752	0.592494	0.993025	-0.445376	-2.26654	1.37578	0.631102	0.990282	0.0766696	-0.159149	0.312488	0.523274	0.992818	0.00138466	-0.0113823	0.0141517	0.831352	0.939367
191	PC(16:1_20:4)	0.190825	-0.0718482	0.453497	0.154118	0.722955	-0.0872269	-0.305227	0.130773	0.432173	0.993025	0.179191	-1.63992	1.9983	0.846623	0.990282	-0.0841903	-0.319743	0.151363	0.482878	0.992818	-0.0111867	-0.0239393	0.0015659	0.0854236	0.53822
192	PC(16:1_22:6)	0.210637	-0.054373	0.475647	0.119016	0.686817	-0.150453	-0.370393	0.0694863	0.179564	0.993025	-0.167922	-2.00322	1.66737	0.857414	0.990282	-0.033432	-0.271081	0.204217	0.782366	0.992818	-0.0114619	-0.024328	0.00140424	0.080684	0.53822
193	PC(17:0_18:1)	0.0537228	-0.20876	0.316205	0.687773	0.935565	0.00443643	-0.213405	0.222278	0.9681	0.993025	0.238132	-1.57966	2.05592	0.796997	0.990282	-0.125872	-0.361254	0.109511	0.293939	0.992818	-0.00841365	-0.021157	0.00432974	0.195174	0.656804
194	PC(17:0_18:2)	0.111904	-0.185263	0.40907	0.459747	0.81565	-0.0577392	-0.304366	0.188888	0.645745	0.993025	0.828199	-1.22979	2.88619	0.429525	0.990282	0.0930257	-0.173459	0.359511	0.493134	0.992818	-0.00519502	-0.0196223	0.00923225	0.479619	0.846586
195	PC(17:0_20:4)	0.0998968	-0.176715	0.376508	0.478325	0.825018	0.0630018	-0.166566	0.29257	0.590004	0.993025	2.41452	0.498881	4.33016	0.0136005	0.990282	-0.103762	-0.351814	0.144291	0.411562	0.992818	-0.0130202	-0.0264495	0.000409172	0.0573725	0.52117
196	PC(17:0_22:6)	0.183893	-0.0935274	0.461313	0.193404	0.725448	-0.0380597	-0.268299	0.192179	0.745491	0.993025	0.753563	-1.16768	2.6748	0.441308	0.990282	0.0323708	-0.216407	0.281148	0.798333	0.992818	-0.00952736	-0.0229959	0.00394123	0.165215	0.618579
197	PC(17:1_18:2)	0.0594339	-0.22372	0.342588	0.680236	0.927509	0.0822353	-0.152762	0.317233	0.492074	0.993025	1.06237	-0.898577	3.02332	0.287663	0.990282	-0.100222	-0.354142	0.153697	0.438434	0.992818	-0.00288308	-0.01663	0.0108639	0.680487	0.890413
198	PC(18:0_18:1)	-0.06124	-0.334104	0.211624	0.659448	0.92373	-0.105783	-0.33224	0.120675	0.359198	0.993025	-1.0857	-2.97539	0.803983	0.259527	0.990282	-0.122956	-0.367648	0.121736	0.324003	0.992818	0.00404741	-0.00919998	0.0172948	0.548607	0.867655
199	PC(18:0_18:2)	-0.138841	-0.413484	0.135801	0.321086	0.774582	0.102218	-0.125716	0.330152	0.378704	0.993025	-1.17387	-3.07587	0.728136	0.225873	0.990282	-0.0331855	-0.279472	0.213101	0.79133	0.992818	0.00349551	-0.00983823	0.0168293	0.606746	0.877957
200	PC(18:0_20:3)	-0.223042	-0.483854	0.0377696	0.0935458	0.650738	-0.130381	-0.346836	0.0860744	0.237205	0.993025	0.0971167	-1.7091	1.90334	0.915913	0.990282	-0.0230834	-0.256967	0.2108	0.846329	0.992818	0.00895233	-0.00370992	0.0216146	0.165434	0.618579
201	PC(18:0_20:4)	0.0175628	-0.262983	0.298109	0.902163	0.981783	0.0360739	-0.196759	0.268907	0.760953	0.993025	1.19735	-0.74554	3.14024	0.226551	0.990282	-0.122141	-0.373722	0.12944	0.340625	0.992818	-0.00348324	-0.0171036	0.0101371	0.615579	0.877957
202	PC(18:0_22:4)	0.0227454	-0.25772	0.303211	0.873472	0.980029	-0.131928	-0.364694	0.100839	0.266009	0.993025	-0.50596	-2.44829	1.43637	0.609031	0.990282	-0.109151	-0.36066	0.142357	0.394266	0.992818	0.0041764	-0.00944005	0.0177928	0.547049	0.867655
203	PC(18:0_22:5) (n3)	0.0508789	-0.234006	0.335764	0.725827	0.946118	-0.101322	-0.337756	0.135113	0.400223	0.993025	-1.08218	-3.05511	0.890763	0.281711	0.990282	-0.0769164	-0.332388	0.178556	0.554443	0.992818	-0.00708967	-0.0209207	0.00674135	0.314384	0.778197
204	PC(18:0_22:5) (n6)	-0.00688617	-0.295569	0.281797	0.96264	0.992966	-0.134462	-0.374048	0.105125	0.270719	0.993025	-0.473149	-2.47239	1.52609	0.642157	0.990282	-0.0457527	-0.30463	0.213125	0.728568	0.992818	0.00308964	-0.0109258	0.017105	0.665127	0.890413
205	PC(18:0_22:6)	0.0746334	-0.22563	0.374897	0.625524	0.90397	0.00589836	-0.243299	0.255095	0.962928	0.993025	-0.628258	-2.70769	1.45118	0.553058	0.990282	0.0742213	-0.195041	0.343484	0.588366	0.992818	-0.00538784	-0.0199655	0.00918977	0.468094	0.840898
206	PC(18:1_18:1)	-0.0265387	-0.31636	0.263283	0.857302	0.96925	-0.140576	-0.381107	0.0999555	0.251419	0.993025	-0.279148	-2.28627	1.72798	0.784779	0.990282	-0.070738	-0.330637	0.189161	0.593071	0.992818	0.00450649	-0.00956419	0.0185772	0.529482	0.860213
207	PC(18:1_18:2)	-0.105835	-0.398648	0.186979	0.477965	0.825018	0.00588574	-0.237129	0.2489	0.962067	0.993025	0.809105	-1.21874	2.83695	0.433469	0.990282	0.0524876	-0.210094	0.315069	0.694694	0.992818	0.00975422	-0.00446172	0.0239701	0.178247	0.638719
208	PC(18:1_20:3)	-0.17093	-0.443429	0.101569	0.218384	0.725448	-0.125925	-0.352079	0.10023	0.274504	0.993025	0.464587	-1.42257	2.35175	0.628832	0.990282	-0.0159643	-0.260329	0.2284	0.897922	0.999302	0.0117637	-0.00146598	0.0249934	0.0812514	0.53822
209	PC(18:1_22:6) (a)	-0.0159102	-0.299294	0.267473	0.912213	0.981993	-0.165373	-0.400561	0.0698151	0.167749	0.993025	-0.494462	-2.457	1.46807	0.620818	0.990282	0.0369738	-0.217151	0.291099	0.775113	0.992818	0.00222582	-0.0115323	0.0159839	0.750733	0.920433
210	PC(18:1_22:6) (b)	0.0974813	-0.195719	0.390681	0.513926	0.843345	-0.0835619	-0.326897	0.159773	0.500195	0.993025	0.520391	-1.51013	2.55091	0.614824	0.990282	0.0217633	-0.241165	0.284692	0.870882	0.993897	-0.0119595	-0.0261942	0.00227516	0.0994316	0.53822
211	PC(18:2_18:2)	-0.060755	-0.316899	0.195389	0.641416	0.915971	0.0428876	-0.169693	0.255468	0.692004	0.993025	-0.568744	-2.34264	1.20515	0.529039	0.990282	0.0136977	-0.216	0.243395	0.90678	0.999302	0.0036156	-0.00882002	0.0160512	0.568107	0.873572
212	PC(18:2_20:5)	0.0283004	-0.237538	0.294139	0.834414	0.963063	-0.0860586	-0.306685	0.134568	0.44383	0.993025	-0.758159	-2.59919	1.08287	0.418855	0.990282	-0.053963	-0.292355	0.184429	0.656708	0.992818	-0.00167245	-0.0145788	0.0112339	0.799145	0.931555
213	PC(20:0_20:4)	0.00085401	-0.28169	0.283398	0.995264	0.996723	-0.033328	-0.267819	0.201163	0.780179	0.993025	0.537792	-1.41893	2.49452	0.589453	0.990282	-0.124883	-0.378255	0.12849	0.333335	0.992818	0.00353416	-0.0101832	0.0172515	0.612953	0.877957
214	PC(28:0)	0.173487	-0.0984251	0.4454	0.210601	0.725448	-0.0341422	-0.25981	0.191526	0.766405	0.993025	-0.537368	-2.42047	1.34573	0.57529	0.990282	0.0505147	-0.193324	0.294353	0.684175	0.992818	-0.010899	-0.0241002	0.00230224	0.10542	0.53822
215	PC(31:0) (a)	0.119544	-0.168875	0.407962	0.41585	0.81565	-0.0639873	-0.303354	0.175379	0.599681	0.993025	0.130436	-1.86697	2.12784	0.897965	0.990282	-0.0621758	-0.320816	0.196464	0.636921	0.992818	-0.0118866	-0.0258892	0.00211591	0.0959775	0.53822
216	PC(31:0) (b)	0.177852	-0.104568	0.460272	0.216576	0.725448	0.0191249	-0.215264	0.253513	0.872704	0.993025	-0.614339	-2.5702	1.34153	0.537446	0.990282	0.00676453	-0.246497	0.260026	0.958171	0.999302	-0.0193928	-0.0331041	-0.00568143	0.0056597	0.52089
217	PC(32:1)	0.23062	-0.0449527	0.506193	0.100761	0.655369	-0.107353	-0.336058	0.121353	0.356866	0.993025	-0.623711	-2.53216	1.28473	0.521111	0.990282	0.0701607	-0.17696	0.317281	0.577234	0.992818	-0.00672586	-0.0201048	0.00665303	0.323783	0.780711
218	PC(32:2)	0.154752	-0.0989392	0.408442	0.231306	0.735677	-0.0546586	-0.265204	0.155887	0.61025	0.993025	-0.163518	-1.92042	1.59339	0.854986	0.990282	0.0921318	-0.135366	0.31963	0.426612	0.992818	-0.00505092	-0.0173675	0.00726563	0.4208	0.836058
219	PC(33:0) (a)	0.248409	-0.0169834	0.513801	0.0665103	0.650738	0.0702372	-0.150019	0.290494	0.531266	0.993025	2.08234	0.244398	3.92028	0.0264596	0.990282	-0.0462823	-0.284274	0.191709	0.702572	0.992818	-0.014163	-0.0270477	-0.00127835	0.0312736	0.52089
220	PC(33:0) (b)	0.169982	-0.0938589	0.433822	0.206185	0.725448	0.126375	-0.0925934	0.345344	0.257381	0.993025	-0.00891949	-1.83611	1.81828	0.992352	0.994923	-0.0127455	-0.249345	0.223854	0.915756	0.999302	-0.020252	-0.0330613	-0.0074427	0.00200127	0.500157
221	PC(33:1)	0.148887	-0.115309	0.413084	0.268743	0.750626	-0.0558579	-0.275122	0.163407	0.616941	0.993025	-0.0618124	-1.89147	1.76785	0.947107	0.992558	-0.11545	-0.35237	0.121469	0.338837	0.992818	-0.0139161	-0.0267427	-0.00108949	0.0335257	0.52089
222	PC(33:2)	0.082317	-0.18657	0.351203	0.547803	0.863268	0.176497	-0.0466595	0.399654	0.12084	0.993025	0.583556	-1.27858	2.4457	0.538381	0.990282	-0.0107072	-0.251832	0.230418	0.930514	0.999302	-0.0143703	-0.0274246	-0.00131604	0.0310298	0.52089
223	PC(34:5)	0.101785	-0.166856	0.370427	0.456988	0.81565	-0.0681874	-0.291141	0.154766	0.548199	0.993025	-0.692759	-2.5532	1.16768	0.464773	0.990282	-0.0409384	-0.281844	0.199967	0.73862	0.992818	-0.0108272	-0.0238696	0.00221516	0.103517	0.53822
224	PC(35:5)	0.0738066	-0.202695	0.350309	0.600213	0.893581	-0.114975	-0.344452	0.114502	0.325411	0.993025	-0.492606	-2.40749	1.42228	0.613491	0.990282	-0.0810875	-0.329042	0.166867	0.520844	0.992818	-0.0135743	-0.0269984	-0.000150324	0.0474985	0.52117
225	PC(36:6) (a)	0.0833046	-0.200257	0.366867	0.564078	0.872599	-0.105816	-0.341153	0.12952	0.377447	0.993025	-0.766318	-2.73009	1.19746	0.44364	0.990282	-0.0397571	-0.294042	0.214528	0.75884	0.992818	-0.00725774	-0.0210245	0.00650904	0.300812	0.774931
226	PC(38:2)	0.0215102	-0.232181	0.275201	0.867766	0.977295	-0.0917392	-0.302285	0.118806	0.392379	0.993025	-0.0908602	-1.84777	1.66605	0.919111	0.990282	0.142831	-0.084667	0.37033	0.217969	0.992818	0.0115933	-0.000723286	0.0239098	0.0649992	0.52117
227	PC(38:4) (b)	0.0300068	-0.239582	0.299595	0.826989	0.962501	-0.070664	-0.294403	0.153075	0.535207	0.993025	-0.000815673	-1.86782	1.86619	0.999315	0.999315	-0.0453281	-0.287083	0.196426	0.712754	0.992818	-0.00040473	-0.0134931	0.0126836	0.95158	0.988418
228	PC(38:5) (a)	0.0925917	-0.193507	0.37869	0.525172	0.843345	-0.150174	-0.387616	0.0872669	0.214596	0.993025	0.350145	-1.63119	2.33148	0.728588	0.990282	-0.1749	-0.43146	0.08166	0.181064	0.992818	-0.00963605	-0.023526	0.00425386	0.173498	0.630456
229	PC(38:5) (b)	-0.0709451	-0.344122	0.202232	0.610114	0.901199	-0.164072	-0.39079	0.0626451	0.155701	0.993025	-0.342587	-2.23444	1.54927	0.722161	0.990282	-0.102573	-0.347546	0.1424	0.411109	0.992818	-0.00262099	-0.0158836	0.0106416	0.697987	0.897411
230	PC(38:6) (a)	-0.00278604	-0.248203	0.242631	0.982215	0.992966	-0.00486007	-0.208539	0.198819	0.962628	0.993025	-0.270458	-1.97007	1.42915	0.754687	0.990282	-0.134117	-0.354196	0.0859617	0.231761	0.992818	-0.00456737	-0.0164822	0.00734751	0.451729	0.839187
231	PC(38:7)(c)	0.163474	-0.092818	0.419766	0.210732	0.725448	-0.161022	-0.373726	0.0516815	0.137559	0.993025	0.229944	-1.54497	2.00486	0.799194	0.990282	-0.0387878	-0.268618	0.191043	0.740352	0.992818	-0.0108916	-0.0233345	0.00155118	0.0860915	0.53822
232	PC(39:5)(a)	0.179424	-0.0908146	0.449662	0.192681	0.725448	-0.0299719	-0.254251	0.194307	0.793004	0.993025	0.730969	-1.14053	2.60247	0.44323	0.990282	-0.0827343	-0.325072	0.159603	0.502694	0.992818	-0.0108937	-0.0240136	0.00222622	0.103451	0.53822
233	PC(39:5)(b)	0.151145	-0.123543	0.425833	0.280194	0.755646	-0.0501081	-0.278079	0.177863	0.666048	0.993025	0.746727	-1.15559	2.64904	0.44095	0.990282	-0.0963255	-0.342653	0.150002	0.442684	0.992818	-0.0116272	-0.0249632	0.0017087	0.0873372	0.53822
234	PC(40:10)	0.131185	-0.189671	0.452041	0.422196	0.81565	-5.65405e-05	-0.266344	0.266231	0.999667	0.999667	-1.92891	-4.15096	0.293134	0.0887182	0.990282	-0.101445	-0.389174	0.186283	0.488825	0.992818	0.00430888	-0.0112685	0.0198862	0.587062	0.873572
235	PC(40:7) (a)	-0.0570378	-0.316363	0.202287	0.665838	0.92373	0.0322449	-0.182976	0.247466	0.768612	0.993025	0.456507	-1.33942	2.25243	0.617717	0.990282	-0.0117407	-0.244291	0.22081	0.921027	0.999302	-0.00660241	-0.0191925	0.00598767	0.303364	0.774931
236	PC(40:8)	0.153622	-0.0884791	0.395724	0.213103	0.725448	-0.0445833	-0.24551	0.156344	0.663071	0.993025	-0.420042	-2.09669	1.2566	0.622794	0.990282	-0.131616	-0.348721	0.0854894	0.234198	0.992818	-0.00536115	-0.017115	0.00639273	0.370618	0.817259
237	PC(44:12)	0.233079	-0.0377401	0.503899	0.0914764	0.650738	0.0367273	-0.188033	0.261488	0.748315	0.993025	-1.04038	-2.91591	0.835144	0.276309	0.990282	0.0041382	-0.23872	0.246996	0.973308	0.999302	-0.00200612	-0.0151543	0.011142	0.76448	0.920433
238	PC(O-16:0/16:0)	0.251641	-0.0167046	0.519988	0.0660071	0.650738	0.102974	-0.119734	0.325682	0.364097	0.993025	-0.733597	-2.592	1.1248	0.438381	0.990282	0.0463337	-0.194307	0.286974	0.70538	0.992818	-0.0039401	-0.0169681	0.00908795	0.552661	0.868173
239	PC(O-16:0/20:3)	0.0373422	-0.25688	0.331564	0.80319	0.952321	0.0823515	-0.161832	0.326535	0.507897	0.993025	0.428591	-1.60901	2.46619	0.679599	0.990282	-0.0290151	-0.29286	0.234829	0.829033	0.992818	-0.00512144	-0.0194057	0.00916286	0.481507	0.846586
240	PC(O-16:0/20:4)	0.253757	-0.00772515	0.515239	0.057136	0.650738	-0.00126005	-0.218272	0.215751	0.990903	0.994758	-0.0108238	-1.82169	1.80004	0.990635	0.99449	-0.0571757	-0.291661	0.177309	0.632108	0.992818	-0.00926854	-0.0219633	0.00342627	0.152074	0.600537
241	PC(O-16:0/22:6)	0.221337	-0.0534901	0.496163	0.114212	0.686817	-0.0175277	-0.245614	0.210559	0.880054	0.993025	-0.632234	-2.53551	1.27104	0.514296	0.990282	-0.0678341	-0.314286	0.178618	0.588913	0.992818	-0.0123234	-0.025666	0.00101932	0.0701819	0.526455
242	PC(O-18:0/18:1)	0.109661	-0.167486	0.386807	0.437303	0.81565	0.0168075	-0.213204	0.246819	0.885904	0.993025	-0.869648	-2.78899	1.0497	0.373793	0.990282	-0.118782	-0.367314	0.12975	0.348191	0.992818	0.00375051	-0.0097048	0.0172058	0.584191	0.873572
243	PC(O-18:0/18:2)	0.200611	-0.0892696	0.490492	0.17455	0.725448	0.183735	-0.0568459	0.424315	0.134125	0.993025	-0.062657	-2.07019	1.94488	0.95113	0.992558	-0.149551	-0.409503	0.110401	0.258898	0.992818	0.00594634	-0.00812722	0.0200199	0.406871	0.830919
244	PC(O-18:0/20:4)	0.104882	-0.178059	0.387823	0.466787	0.81565	0.0449485	-0.189873	0.27977	0.707025	0.993025	-0.185063	-2.14454	1.77441	0.85287	0.990282	-0.212598	-0.466327	0.0411306	0.100348	0.992818	-0.0104772	-0.0242139	0.00325941	0.13463	0.582143
245	PC(O-18:0/22:6)	0.154311	-0.123161	0.431784	0.275085	0.755646	-0.0553725	-0.285655	0.17491	0.636837	0.993025	-0.647035	-2.56864	1.27457	0.508572	0.990282	-0.187928	-0.436752	0.060897	0.138476	0.992818	-0.00660725	-0.0200784	0.00686388	0.335699	0.784209
246	PC(O-18:1/18:1)	0.0305568	-0.241119	0.302233	0.825201	0.962501	0.0433919	-0.18208	0.268864	0.705517	0.993025	-0.251576	-2.13304	1.62989	0.792889	0.990282	-0.0820182	-0.325645	0.161609	0.508649	0.992818	0.00652006	-0.00666967	0.0197098	0.33192	0.783925
247	PC(O-18:1/18:2)	0.0929499	-0.200531	0.386431	0.534067	0.850089	0.0399786	-0.20359	0.283547	0.747228	0.993025	-0.356729	-2.3892	1.67574	0.730367	0.990282	-0.0249523	-0.288133	0.238228	0.852308	0.992818	0.00665812	-0.00759022	0.0209065	0.359021	0.811014
248	PC(O-32:1)	0.334072	0.0439655	0.624179	0.0240953	0.55448	0.14349	-0.0972776	0.384258	0.2422	0.993025	-0.67343	-2.68253	1.33567	0.510495	0.990282	-0.0388848	-0.299039	0.221269	0.769143	0.992818	-0.00983745	-0.023922	0.00424706	0.170599	0.629457
249	PC(O-32:2)	0.167913	-0.0988056	0.434631	0.216716	0.725448	0.0150954	-0.206262	0.236452	0.893472	0.993025	-0.37245	-2.21957	1.47467	0.692162	0.990282	-0.147636	-0.386817	0.0915444	0.22581	0.992818	0.00399567	-0.00895335	0.0169447	0.544632	0.867655
250	PC(O-34:1)	0.0995375	-0.194748	0.393823	0.506664	0.843345	-0.151808	-0.396044	0.0924283	0.222595	0.993025	-0.900523	-2.93856	1.13752	0.385752	0.990282	0.107913	-0.155989	0.371815	0.422136	0.992818	0.00200682	-0.0122806	0.0162942	0.782693	0.924647
251	PC(O-34:2)	0.173007	-0.105879	0.451894	0.223497	0.732624	0.122682	-0.108775	0.354138	0.298209	0.993025	0.119788	-1.81161	2.05119	0.903066	0.990282	-0.0571128	-0.307206	0.19298	0.653868	0.992818	-0.000398317	-0.0139381	0.0131415	0.953933	0.988418
252	PC(O-34:4)	0.126313	-0.149332	0.401958	0.368391	0.797422	-0.0499758	-0.278741	0.17879	0.667963	0.993025	0.154075	-1.75487	2.06302	0.87407	0.990282	-0.27057	-0.517756	-0.0233846	0.0319864	0.992818	0.00694083	-0.00644158	0.0203232	0.308701	0.778197
253	PC(O-35:4)	0.234542	-0.0559068	0.524991	0.113252	0.686817	0.0792148	-0.161837	0.320267	0.518813	0.993025	1.42563	-0.585837	3.4371	0.164396	0.990282	-0.106273	-0.366734	0.154189	0.423153	0.992818	-0.00785874	-0.0219599	0.00624238	0.274068	0.748397
254	PC(O-36:0)	0.155645	-0.122108	0.433398	0.271446	0.753044	0.0492378	-0.181277	0.279753	0.67492	0.993025	-1.19669	-3.12024	0.726856	0.222175	0.990282	-0.0425217	-0.291598	0.206555	0.737461	0.992818	3.5781e-05	-0.013449	0.0135205	0.995843	0.997131
255	PC(O-36:5)	0.14718	-0.131896	0.426256	0.300636	0.760859	0.0281447	-0.203468	0.259758	0.811406	0.993025	-0.758405	-2.69111	1.1743	0.441101	0.990282	-0.0484459	-0.298708	0.201816	0.703868	0.992818	-0.00460466	-0.0181536	0.00894432	0.504633	0.853739
256	PC(O-38:5)	0.0934102	-0.188379	0.375199	0.515172	0.843345	0.0895139	-0.144351	0.323379	0.452407	0.993025	-0.62252	-2.57402	1.32898	0.531127	0.990282	-0.113234	-0.36593	0.139462	0.379076	0.992818	-0.0107012	-0.0243819	0.00297954	0.124974	0.557872
257	PC(O-40:5)	0.098015	-0.180883	0.376913	0.490225	0.832093	-0.0874081	-0.318873	0.144057	0.458484	0.993025	-1.35862	-3.29009	0.572854	0.167593	0.990282	-0.116884	-0.366986	0.133219	0.358967	0.992818	-0.00454523	-0.0180855	0.0089951	0.509876	0.854208
258	PC(O-40:7) (a)	0.090499	-0.185812	0.36681	0.520207	0.843345	-0.0686961	-0.298015	0.160622	0.556429	0.993025	-0.978848	-2.89241	0.934711	0.315384	0.990282	-0.0519497	-0.299733	0.195833	0.680583	0.992818	-0.00763108	-0.0210458	0.00578367	0.264264	0.74611
259	PC(O-40:7) (b)	0.0301732	-0.289692	0.350038	0.853046	0.968205	0.00796335	-0.257502	0.273428	0.953027	0.993025	-0.174093	-2.38928	2.04109	0.877353	0.990282	-0.103414	-0.390254	0.183426	0.479077	0.992818	-0.0153566	-0.0308859	0.000172667	0.0525924	0.52117
260	PC(P-15:0/20:4) (a)	0.120221	-0.171362	0.411803	0.4183	0.81565	-0.00233223	-0.244325	0.23966	0.984901	0.993025	1.14454	-0.874783	3.16386	0.265999	0.990282	-0.178519	-0.439997	0.0829583	0.180413	0.992818	-0.00463766	-0.0187938	0.00951851	0.520104	0.859294
261	PC(P-15:0/20:4) (b)	0.120432	-0.177438	0.418302	0.427374	0.81565	0.0273991	-0.219811	0.27461	0.827713	0.993025	0.511909	-1.55095	2.57477	0.626087	0.990282	-0.105488	-0.372604	0.161628	0.438187	0.992818	-0.0120318	-0.0264932	0.0024296	0.102758	0.53822
262	PC(P-16:0/14:0)	0.24232	-0.0239797	0.508619	0.0744149	0.650738	0.0524556	-0.168554	0.273465	0.6412	0.993025	-1.46322	-3.30744	0.381006	0.119675	0.990282	0.0996088	-0.139196	0.338414	0.412895	0.992818	-0.0187672	-0.0316959	-0.00583857	0.00452338	0.500157
263	PC(P-16:0/16:0)	0.343062	0.0762099	0.609914	0.0118491	0.55448	0.053886	-0.167582	0.275354	0.632838	0.993025	-0.886293	-2.73434	0.961758	0.346532	0.990282	-0.120668	-0.359968	0.118633	0.322313	0.992818	-0.0119552	-0.0249107	0.0010003	0.0704289	0.526455
264	PC(P-16:0/16:1)	0.360908	0.0931501	0.628667	0.00834589	0.55448	-0.024004	-0.246224	0.198216	0.832021	0.993025	-1.30441	-3.15873	0.549921	0.167576	0.990282	-0.0238463	-0.26396	0.216267	0.845381	0.992818	-0.00747588	-0.0204754	0.00552364	0.259073	0.74611
265	PC(P-16:0/18:0)	0.245443	-0.00745884	0.498345	0.0571231	0.650738	0.118683	-0.0912071	0.328574	0.267129	0.993025	-0.396882	-2.14832	1.35456	0.656368	0.990282	-0.0965201	-0.323311	0.130271	0.403471	0.992818	-0.0041674	-0.0164456	0.00811084	0.505184	0.853739
266	PC(P-16:0/18:1)	0.180511	-0.0663501	0.427371	0.151447	0.714758	-0.0216613	-0.226538	0.183215	0.835531	0.993025	-0.872012	-2.58162	0.837592	0.316771	0.990282	-0.159242	-0.380615	0.0621312	0.158196	0.992818	0.000947285	-0.0110377	0.0129322	0.876658	0.963338
267	PC(P-16:0/18:2)	0.271351	0.0210552	0.521648	0.0336589	0.598317	0.0951093	-0.112619	0.302837	0.368799	0.993025	0.026682	-1.70671	1.76008	0.975886	0.99449	-0.0800656	-0.30452	0.144389	0.483739	0.992818	-0.00550375	-0.0176555	0.00664799	0.37398	0.818359
268	PC(P-16:0/18:3)	0.0299074	-0.244045	0.303859	0.830258	0.962501	0.0260769	-0.201284	0.253438	0.82181	0.993025	-0.916289	-2.81351	0.980932	0.343146	0.990282	-0.0924761	-0.338144	0.153191	0.459915	0.992818	-0.00542652	-0.0187267	0.0078737	0.42317	0.836058
269	PC(P-16:0/20:4)	0.322716	0.0646761	0.580755	0.0143409	0.55448	-0.0223088	-0.236463	0.191846	0.837919	0.993025	0.62344	-1.16358	2.41046	0.493398	0.990282	-0.0019124	-0.23331	0.229485	0.987052	0.999302	-0.00748388	-0.0200115	0.00504379	0.241082	0.723758
270	PC(P-16:0/20:5)	0.193874	-0.0915643	0.479312	0.182664	0.725448	-0.0551547	-0.292048	0.181739	0.647565	0.993025	-0.441114	-2.41788	1.53565	0.661275	0.990282	-0.0105528	-0.266521	0.245415	0.935477	0.999302	-0.00945008	-0.023308	0.00440779	0.180925	0.642368
271	PC(P-16:0/22:6)	0.275374	0.00766444	0.543083	0.0438151	0.598317	-0.0643548	-0.286534	0.157825	0.569563	0.993025	-0.644121	-2.49811	1.20987	0.495191	0.990282	-0.0986844	-0.338754	0.141385	0.419698	0.992818	-0.0146314	-0.0276285	-0.00163428	0.0274331	0.52089
272	PC(P-17:0/20:4) (a)	0.238724	-0.0339473	0.511395	0.0860323	0.650738	0.0403375	-0.18596	0.266635	0.726335	0.993025	0.947636	-0.940716	2.83599	0.324639	0.990282	-0.0708228	-0.315342	0.173696	0.569578	0.992818	-0.0143524	-0.0275905	-0.00111438	0.0336492	0.52089
273	PC(P-17:0/20:4) (b)	0.261942	-0.0196542	0.543538	0.0682078	0.650738	0.0695187	-0.164186	0.303223	0.559202	0.993025	1.32683	-0.623333	3.27698	0.181924	0.990282	-0.0821569	-0.334679	0.170365	0.522988	0.992818	-0.0144491	-0.0281204	-0.000777737	0.0383584	0.52117
274	PC(P-18:0/18:2)	0.250001	-0.0138874	0.51389	0.0632857	0.650738	0.0724963	-0.146513	0.291505	0.515767	0.993025	0.204646	-1.62288	2.03218	0.825959	0.990282	-0.138248	-0.374891	0.0983957	0.251611	0.992818	-0.000401305	-0.013213	0.0124104	0.950954	0.988418
275	PC(P-18:0/20:4)	0.197767	-0.0709522	0.466485	0.148821	0.714758	-0.00723393	-0.230251	0.215783	0.949213	0.993025	0.774504	-1.08647	2.63548	0.41394	0.990282	-0.239895	-0.48087	0.00107944	0.0510312	0.992818	-0.00907339	-0.0221195	0.00397276	0.172424	0.630456
276	PC(P-18:0/22:5)	0.142636	-0.127917	0.413189	0.300805	0.760859	0.0297619	-0.194778	0.254302	0.794655	0.993025	-1.42739	-3.30108	0.44629	0.135095	0.990282	-0.222032	-0.464652	0.0205875	0.0727809	0.992818	-0.0140094	-0.0271446	-0.00087419	0.0366302	0.52117
277	PC(P-18:0/22:6)	0.165955	-0.110327	0.442237	0.238508	0.735677	-0.0128547	-0.242149	0.21644	0.91234	0.993025	0.0350543	-1.8783	1.94841	0.971301	0.99449	-0.208431	-0.456188	0.0393264	0.0989896	0.992818	-0.00801765	-0.021431	0.00539569	0.240807	0.723758
278	PC(P-18:1/18:1)	0.174673	-0.0932458	0.442591	0.200822	0.725448	-0.0273558	-0.249709	0.194997	0.809104	0.993025	-0.525984	-2.38142	1.32945	0.57781	0.990282	-0.062872	-0.303129	0.177385	0.60739	0.992818	0.00552674	-0.00748055	0.018534	0.404239	0.829151
279	PC(P-18:1/22:6)	0.144276	-0.136518	0.425069	0.313232	0.774582	-0.0376149	-0.270653	0.195423	0.751286	0.993025	-0.033533	-1.97813	1.91107	0.972987	0.99449	-0.0898226	-0.341625	0.16198	0.483731	0.992818	-0.00702066	-0.020653	0.0066117	0.312118	0.778197
280	PC(P-20:0/20:4)	0.07619	-0.20934	0.36172	0.600339	0.893581	-0.0687587	-0.305728	0.168211	0.568888	0.993025	-0.744534	-2.72194	1.23287	0.459803	0.990282	-0.202857	-0.458907	0.053193	0.120211	0.992818	-0.0110928	-0.0249551	0.00276953	0.116542	0.53822
281	PC(P-35:2)(a)	0.270905	-0.00996454	0.551774	0.0586673	0.650738	0.0761001	-0.157001	0.309201	0.521555	0.993025	1.17405	-0.771079	3.11917	0.236243	0.990282	-0.0647194	-0.31659	0.187151	0.613899	0.992818	-0.00025003	-0.0138861	0.013386	0.971278	0.991779
282	PC(P-35:2)(b)	0.25941	-0.0221887	0.541009	0.0709113	0.650738	0.120432	-0.113275	0.354139	0.311824	0.993025	0.840113	-1.11007	2.79029	0.397758	0.990282	-0.0619799	-0.314505	0.190545	0.629868	0.992818	-0.00280604	-0.0164775	0.0108654	0.686941	0.892424
283	PC(P-36:3)	0.110782	-0.176209	0.397772	0.448577	0.81565	0.0913282	-0.146853	0.32951	0.451604	0.993025	-0.194178	-2.1817	1.79334	0.847862	0.990282	-0.0255862	-0.282946	0.231774	0.845219	0.992818	-0.00489478	-0.018828	0.00903845	0.490392	0.849135
284	PC(P-38:5) (a)	0.210845	-0.0447872	0.466477	0.105759	0.656077	-0.0574535	-0.26961	0.154703	0.59493	0.993025	-0.454286	-2.22463	1.31606	0.614378	0.990282	-0.15791	-0.387149	0.0713292	0.17655	0.992818	-0.00929708	-0.0217079	0.00311372	0.14171	0.589696
285	PC(P-38:5) (b)	0.180146	-0.0878344	0.448127	0.187193	0.725448	0.00569406	-0.216711	0.228099	0.959904	0.993025	-0.0461276	-1.902	1.80974	0.961073	0.99449	-0.104834	-0.345147	0.135478	0.391814	0.992818	-0.00842386	-0.0214342	0.00458646	0.203933	0.6725
286	LPC(14:0) [sn1]	0.0280954	-0.265681	0.321872	0.851038	0.968205	-0.158209	-0.402022	0.0856051	0.202947	0.993025	-0.422031	-2.45655	1.61248	0.683784	0.990282	-0.183228	-0.446673	0.0802175	0.17241	0.992818	0.00917659	-0.0050861	0.0234393	0.206791	0.675343
287	LPC(14:0) [sn2]	0.0375146	-0.255156	0.330185	0.801275	0.952321	-0.138637	-0.381532	0.104259	0.262666	0.993025	-0.163936	-2.19079	1.86292	0.873807	0.990282	-0.179544	-0.441997	0.0829094	0.179544	0.992818	0.00878715	-0.00542184	0.0229961	0.224938	0.693632
288	LPC(15-MHDA) [sn1] [104_sn1]	0.0527397	-0.248108	0.353588	0.73068	0.946118	-0.00588426	-0.255567	0.243798	0.963089	0.993025	1.17626	-0.907228	3.25974	0.267883	0.990282	-0.141616	-0.411403	0.128171	0.302899	0.992818	0.00326906	-0.0113369	0.0178751	0.660326	0.890413
289	LPC(15-MHDA) [sn1] / LPC(17:0) [sn2]	0.0762875	-0.22157	0.374145	0.61505	0.90397	-0.0176723	-0.264873	0.229528	0.888358	0.993025	0.929113	-1.13366	2.99189	0.37662	0.990282	-0.181019	-0.448124	0.0860858	0.183636	0.992818	0.00564369	-0.00881712	0.0201045	0.443584	0.839187
290	LPC(15-MHDA) [sn2]	0.124201	-0.171928	0.42033	0.410323	0.81225	0.0392448	-0.206521	0.285011	0.753861	0.993025	1.3538	-0.697003	3.40461	0.195245	0.990282	-0.171732	-0.437287	0.0938223	0.204479	0.992818	0.00237683	-0.0120001	0.0167537	0.745465	0.920433
291	LPC(15:0) [sn1]	0.0484144	-0.246616	0.343445	0.747283	0.948192	-0.100286	-0.34514	0.144568	0.421388	0.993025	0.49747	-1.54573	2.54067	0.63261	0.990282	-0.264849	-0.529418	-0.000279301	0.0497595	0.992818	0.00627398	-0.00804958	0.0205975	0.38989	0.819077
292	LPC(15:0) [sn2]	0.0620516	-0.231851	0.355955	0.678467	0.927509	-0.106824	-0.350743	0.137094	0.389963	0.993025	0.820477	-1.21491	2.85587	0.428752	0.990282	-0.283287	-0.546846	-0.0197283	0.0351995	0.992818	0.00594951	-0.00831931	0.0202183	0.413069	0.831544
293	LPC(16:0) [sn1]	0.0112993	-0.284239	0.306838	0.940153	0.990474	-0.067994	-0.31327	0.177282	0.586247	0.993025	0.66103	-1.38569	2.70774	0.526024	0.990282	-0.109519	-0.374544	0.155506	0.417245	0.992818	0.0120665	-0.00228175	0.0264147	0.0991084	0.53822
294	LPC(16:0) [sn2]	-0.0120548	-0.310656	0.286547	0.936814	0.990474	-0.160629	-0.408447	0.0871888	0.203446	0.993025	-0.205038	-2.27297	1.86289	0.845629	0.990282	-0.138957	-0.406729	0.128815	0.308437	0.992818	0.0141901	-0.000306825	0.028687	0.0550307	0.52117
295	LPC(16:1) [sn1]	0.0537501	-0.23174	0.33924	0.711618	0.946118	-0.181464	-0.4184	0.0554728	0.133029	0.993025	-0.220733	-2.19786	1.75639	0.826473	0.990282	-0.245723	-0.501738	0.0102911	0.0599096	0.992818	0.0180756	0.00421523	0.031936	0.0106906	0.52089
296	LPC(16:1) [sn2]	0.108699	-0.171792	0.38919	0.446792	0.81565	-0.17865	-0.411438	0.0541368	0.13224	0.993025	-0.0467878	-1.98929	1.89572	0.962276	0.99449	-0.222593	-0.474124	0.028938	0.0827077	0.992818	0.0162765	0.00265883	0.0298942	0.0192451	0.52089
297	LPC(17:0) [sn1]	0.0504398	-0.250046	0.350926	0.741696	0.946118	-0.0571557	-0.306538	0.192226	0.652702	0.993025	1.10895	-0.972025	3.18993	0.295615	0.990282	-0.185082	-0.454544	0.0843803	0.177799	0.992818	0.00478739	-0.00980104	0.0193758	0.519395	0.859294
298	LPC(17:1) (a) [sn1] [104_sn1]	0.0849563	-0.210755	0.380668	0.572708	0.872599	-0.0866828	-0.332102	0.158737	0.48805	0.993025	0.513742	-1.53417	2.56166	0.622328	0.990282	-0.244956	-0.510136	0.0202244	0.0701429	0.992818	0.0124176	-0.00193901	0.0267742	0.0898746	0.53822
299	LPC(17:1) [sn1] (a) / LPC(17:1) [sn2] (b)	0.117133	-0.177501	0.411766	0.435135	0.81565	-0.0727726	-0.317298	0.171752	0.559012	0.993025	0.249278	-1.79117	2.28973	0.810414	0.990282	-0.211221	-0.475435	0.0529928	0.116898	0.992818	0.0104519	-0.0038524	0.0247562	0.151751	0.600537
300	LPC(17:1) [sn1] (b)	0.0655112	-0.220743	0.351765	0.653173	0.919234	-0.0395139	-0.277084	0.198057	0.743976	0.993025	0.470122	-1.5123	2.45254	0.64148	0.990282	-0.203489	-0.460188	0.0532106	0.119998	0.992818	-0.00126259	-0.0151601	0.0126349	0.85841	0.954501
301	LPC(17:1) [sn2] (a)	0.279241	-0.013366	0.571849	0.0613797	0.650738	-0.0237148	-0.266558	0.219128	0.84793	0.993025	0.15597	-1.87045	2.18239	0.879866	0.990282	-0.223607	-0.486004	0.0387893	0.0947031	0.992818	0.0111356	-0.0030703	0.0253415	0.124175	0.557872
302	LPC(18:0) [sn1]	-0.075851	-0.373804	0.222103	0.617188	0.90397	-0.0751404	-0.322421	0.17214	0.550777	0.993025	0.0391608	-2.02428	2.1026	0.970272	0.99449	-0.185853	-0.453044	0.0813378	0.172364	0.992818	0.00972447	-0.004741	0.0241899	0.187182	0.655346
303	LPC(18:0) [sn2]	-0.00464969	-0.302472	0.293173	0.975543	0.992966	-0.0982815	-0.345453	0.14889	0.435052	0.993025	-0.591801	-2.65433	1.47073	0.573196	0.990282	-0.197881	-0.464955	0.0691919	0.146105	0.992818	0.0142635	-0.000195648	0.0287226	0.0531695	0.52117
304	LPC(18:1) [sn1]	-0.0293793	-0.321519	0.26276	0.843455	0.965731	-0.103927	-0.346382	0.138528	0.400107	0.993025	0.110863	-1.91231	2.13404	0.914311	0.990282	-0.210993	-0.47297	0.0509839	0.114203	0.992818	0.0158613	0.00167807	0.0300445	0.028465	0.52089
305	LPC(18:1) [sn2]	-0.0286952	-0.321105	0.263714	0.847194	0.968205	-0.144487	-0.387166	0.0981918	0.242662	0.993025	-0.396874	-2.42192	1.62817	0.700371	0.990282	-0.195527	-0.457747	0.0666919	0.143549	0.992818	0.0185333	0.00433697	0.0327296	0.0106086	0.52089
306	LPC(18:2) [sn1]	0.0519561	-0.229551	0.333463	0.717051	0.946118	0.0742363	-0.159394	0.307867	0.53273	0.993025	0.463465	-1.48607	2.413	0.640659	0.990282	-0.1328	-0.385242	0.119642	0.30185	0.992818	0.0201541	0.00648713	0.0338211	0.00392802	0.500157
307	LPC(18:2) [sn2]	0.0543232	-0.228088	0.336734	0.705654	0.94331	0.0535349	-0.180846	0.287916	0.653807	0.993025	-0.123987	-2.07979	1.83181	0.900931	0.990282	-0.136124	-0.389377	0.117129	0.291469	0.992818	0.0214771	0.00776625	0.035188	0.00220043	0.500157
308	LPC(18:3) (a) [sn1] [104_sn1]	0.00675622	-0.299878	0.31339	0.965489	0.992966	-0.0140549	-0.268539	0.240429	0.913637	0.993025	-0.360918	-2.48447	1.76264	0.738585	0.990282	-0.156265	-0.43124	0.11871	0.264742	0.992818	0.0130996	-0.00178735	0.0279865	0.0844584	0.53822
309	LPC(18:3) [sn1] (a)/LPC(18:3) [sn2] (b)	0.0380565	-0.267941	0.344054	0.807065	0.953476	-0.0356253	-0.289581	0.218331	0.782964	0.993025	-0.792645	-2.91179	1.3265	0.462765	0.990282	-0.172821	-0.447225	0.101583	0.21653	0.992818	0.0134077	-0.00144833	0.0282637	0.0768097	0.53822
310	LPC(18:3) [sn1] (b)	0.0735949	-0.224934	0.372124	0.628356	0.90397	-0.00669229	-0.25445	0.241065	0.957699	0.993025	-0.503451	-2.57088	1.56398	0.632555	0.990282	-0.205949	-0.473656	0.0617581	0.131304	0.992818	0.0167305	0.00223708	0.0312239	0.0237551	0.52089
311	LPC(18:3) [sn2] (a)	0.0430361	-0.260933	0.347006	0.781006	0.952321	-0.0514503	-0.303723	0.200823	0.688821	0.993025	-0.742868	-2.84797	1.36224	0.488436	0.990282	-0.0923286	-0.364914	0.180257	0.506062	0.992818	0.00756079	-0.00719676	0.0223183	0.314627	0.778197
312	LPC(19:0) (a) [sn1] [104_sn1]	0.133547	-0.166722	0.433816	0.382643	0.797759	0.123552	-0.12565	0.372753	0.330493	0.993025	2.45095	0.371474	4.53042	0.0209774	0.990282	0.017058	-0.252209	0.286325	0.901	0.999302	0.00482469	-0.00975318	0.0194026	0.515844	0.856788
313	LPC(19:0) [sn1] (a) / LPC(19:0) [sn2] (b)	0.149315	-0.150849	0.44948	0.328883	0.774582	0.0547249	-0.19439	0.30384	0.666223	0.993025	1.58272	-0.496027	3.66147	0.135314	0.990282	0.0216692	-0.247504	0.290843	0.874394	0.993897	0.00607289	-0.00849992	0.0206457	0.413328	0.831544
314	LPC(19:0) [sn1] (b)	0.0645664	-0.231337	0.36047	0.668332	0.92373	-0.0883585	-0.333937	0.15722	0.479968	0.993025	0.832403	-1.21684	2.88165	0.425219	0.990282	-0.0602005	-0.325553	0.205152	0.655989	0.992818	0.00575018	-0.00861577	0.0201161	0.432011	0.838294
315	LPC(19:0) [sn2] (a)	0.15021	-0.147207	0.447628	0.321551	0.774582	0.124021	-0.122814	0.370856	0.324051	0.993025	1.82081	-0.23892	3.88053	0.0830365	0.990282	0.00524619	-0.261464	0.271956	0.969189	0.999302	0.0034537	-0.0109857	0.0178931	0.638617	0.884085
316	LPC(19:1) (a)	0.130436	-0.162257	0.423129	0.381701	0.797759	-0.0594322	-0.302347	0.183482	0.630952	0.993025	-0.664728	-2.69174	1.36228	0.519686	0.990282	-0.130747	-0.393221	0.131726	0.328214	0.992818	0.00982854	-0.00438154	0.0240386	0.174791	0.631503
317	LPC(19:1) (b)	-0.021076	-0.314557	0.272405	0.887856	0.981783	-0.101205	-0.344773	0.142363	0.414693	0.993025	0.489473	-1.54299	2.52194	0.636316	0.990282	-0.16387	-0.42705	0.09931	0.221785	0.992818	0.00674834	-0.0075	0.0209967	0.352552	0.807991
318	LPC(19:1) (c)	0.0494266	-0.239064	0.337917	0.736557	0.946118	-0.0912481	-0.330674	0.148178	0.454354	0.993025	-0.314054	-2.31196	1.68385	0.757579	0.990282	-0.22628	-0.484985	0.0324244	0.0863311	0.992818	-0.00267388	-0.0166799	0.0113322	0.707765	0.903164
319	LPC(20:0) [sn1]	-0.060866	-0.347023	0.225291	0.676209	0.927509	-0.11891	-0.3564	0.11858	0.325735	0.993025	-0.532796	-2.51454	1.44895	0.597591	0.990282	-0.262735	-0.519348	-0.00612257	0.0447982	0.992818	0.0112949	-0.0025979	0.0251876	0.110828	0.53822
320	LPC(20:0) [sn2]	0.00530006	-0.284275	0.294875	0.971329	0.992966	-0.116422	-0.356749	0.123904	0.34168	0.993025	-0.472559	-2.47798	1.53286	0.643597	0.990282	-0.181657	-0.441335	0.0780205	0.169934	0.992818	0.0119507	-0.002108	0.0260094	0.0955229	0.53822
321	LPC(20:1) [sn1]	-0.0475862	-0.349213	0.254041	0.756723	0.951044	-0.130515	-0.380843	0.119814	0.306174	0.993025	0.342217	-1.74666	2.4311	0.747687	0.990282	-0.0270956	-0.297581	0.243389	0.844057	0.992818	0.013285	-0.00135885	0.0279288	0.075291	0.53822
322	LPC(20:1) [sn2]	0.0421483	-0.255338	0.339635	0.780854	0.952321	-0.134143	-0.381036	0.11275	0.286279	0.993025	0.409632	-1.65058	2.46984	0.696232	0.990282	0.0267703	-0.240002	0.293543	0.843788	0.992818	0.0165759	0.00213313	0.0310187	0.0245703	0.52089
323	LPC(20:2) [sn1]	0.106867	-0.194588	0.408322	0.48645	0.829322	-0.083891	-0.334077	0.166295	0.510338	0.993025	0.215638	-1.87205	2.30333	0.839271	0.990282	0.0038597	-0.266471	0.274191	0.977633	0.999302	0.0171287	0.00249321	0.0317641	0.0218912	0.52089
324	LPC(20:2) [sn2]	0.188433	-0.109643	0.48651	0.214816	0.725448	-0.0374052	-0.284787	0.209977	0.76654	0.993025	-0.204784	-2.26908	1.85951	0.845549	0.990282	0.106231	-0.16107	0.373532	0.435289	0.992818	0.0172829	0.00281148	0.0317544	0.0193428	0.52089
325	LPC(20:3) [sn1]	0.0201894	-0.272748	0.313127	0.892345	0.981783	-0.0410706	-0.284188	0.202046	0.740105	0.993025	0.421126	-1.60758	2.44983	0.68357	0.990282	-0.0804758	-0.343168	0.182217	0.547529	0.992818	0.0168244	0.00260244	0.0310463	0.0205111	0.52089
326	LPC(20:3) [sn2]	0.0426888	-0.243556	0.328934	0.769645	0.952321	-0.0619959	-0.299559	0.175567	0.608379	0.993025	-0.133684	-2.11604	1.84867	0.894649	0.990282	-0.072772	-0.329463	0.183919	0.577787	0.992818	0.0162902	0.00239311	0.0301872	0.0216843	0.52089
327	LPC(20:4) [sn1]	0.123617	-0.162768	0.410002	0.396817	0.805145	-0.0547468	-0.292426	0.182932	0.651075	0.993025	0.751291	-1.23203	2.73461	0.457089	0.990282	-0.207565	-0.464382	0.0492516	0.112937	0.992818	0.010568	-0.00333585	0.0244718	0.135984	0.582323
328	LPC(20:4) [sn2]	0.126877	-0.156955	0.41071	0.380236	0.797759	-0.0749806	-0.310541	0.16058	0.532014	0.993025	0.805424	-1.16022	2.77107	0.421187	0.990282	-0.176398	-0.430926	0.0781301	0.173935	0.992818	0.0122471	-0.00153279	0.026027	0.0813959	0.53822
329	LPC(20:5) [sn1]	0.107702	-0.181119	0.396524	0.464127	0.81565	-0.0118058	-0.251507	0.227895	0.922952	0.993025	-0.303669	-2.30387	1.69653	0.765617	0.990282	-0.100768	-0.35977	0.158234	0.445001	0.992818	0.00419462	-0.0098275	0.0182167	0.556987	0.868173
330	LPC(20:5) [sn2]	0.0597921	-0.225463	0.345047	0.680653	0.927509	-0.0159919	-0.252733	0.220749	0.894473	0.993025	-0.363426	-2.33892	1.61207	0.717927	0.990282	-0.0881223	-0.343926	0.167681	0.498836	0.992818	0.000684136	-0.0131648	0.0145331	0.922722	0.983729
331	LPC(22:0) [sn1]	-0.104427	-0.375741	0.166886	0.449889	0.81565	-0.161939	-0.38711	0.0632323	0.158286	0.993025	-0.312153	-2.1911	1.5668	0.744264	0.990282	-0.181135	-0.424437	0.0621664	0.144179	0.992818	0.00872596	-0.00444617	0.0218981	0.193679	0.656797
332	LPC(22:0) [sn2]	-0.0355781	-0.306307	0.235151	0.796367	0.952321	-0.165021	-0.389707	0.0596652	0.149654	0.993025	-1.26102	-3.13592	0.61388	0.186968	0.990282	-0.149554	-0.392332	0.0932232	0.226745	0.992818	0.00935998	-0.00378377	0.0225037	0.162401	0.617418
333	LPC(22:1) [sn1]	0.0638532	-0.231976	0.359683	0.671702	0.925084	-0.141694	-0.387212	0.103823	0.257392	0.993025	0.173037	-1.87569	2.22177	0.868274	0.990282	-0.073561	-0.338847	0.191725	0.586146	0.992818	0.00214989	-0.0122125	0.0165122	0.768811	0.920433
334	LPC(22:1) [sn2]	0.0957042	-0.198499	0.389907	0.523045	0.843345	-0.132259	-0.376427	0.111908	0.287744	0.993025	-0.727496	-2.76496	1.30997	0.483315	0.990282	-0.0541564	-0.317984	0.209671	0.686906	0.992818	0.0115838	-0.00269964	0.0258671	0.111711	0.53822
335	LPC(22:4) [sn1]	0.127035	-0.170125	0.424194	0.40137	0.805145	-0.0822721	-0.328893	0.164349	0.512506	0.993025	-0.615926	-2.67387	1.44202	0.556791	0.990282	-0.126757	-0.393236	0.139722	0.350473	0.992818	0.0115878	-0.0028391	0.0260148	0.115183	0.53822
336	LPC(22:4) [sn2]	0.161407	-0.13838	0.461194	0.290658	0.757473	-0.126199	-0.375	0.122603	0.319471	0.993025	-0.353476	-2.42961	1.72266	0.738144	0.990282	-0.0782233	-0.347058	0.190612	0.567807	0.992818	0.00920428	-0.0053502	0.0237588	0.214644	0.68088
337	LPC(22:5) (n3) [sn1] [104_sn1]	0.0497358	-0.245602	0.345074	0.740891	0.946118	-0.0551687	-0.300278	0.189941	0.658533	0.993025	-0.286181	-2.33151	1.75914	0.78351	0.990282	-0.108862	-0.373707	0.155983	0.419727	0.992818	0.00627257	-0.00806592	0.020611	0.39049	0.819077
338	LPC(22:5) [sn1] (n3)/LPC(22:5) [sn2] (n6)	0.129814	-0.160763	0.420392	0.380522	0.797759	-0.0850274	-0.326186	0.156131	0.488818	0.993025	-0.701645	-2.714	1.31071	0.49365	0.990282	-0.131412	-0.391989	0.129164	0.322255	0.992818	0.00912913	-0.00497824	0.0232365	0.204183	0.6725
339	LPC(22:5) [sn1] (n6)	0.111399	-0.191303	0.4141	0.47	0.81565	-0.157468	-0.408689	0.0937521	0.218717	0.993025	0.329533	-1.76679	2.42585	0.757573	0.990282	-0.109096	-0.380545	0.162353	0.43013	0.992818	0.0108342	-0.00386179	0.0255302	0.148128	0.600159
340	LPC(22:5) [sn2] (n3)	0.121047	-0.170569	0.412663	0.415164	0.81565	-0.0924354	-0.334456	0.149585	0.453384	0.993025	-1.32812	-3.34768	0.691429	0.196938	0.990282	-0.125639	-0.387148	0.135869	0.345669	0.992818	0.00499346	-0.00916435	0.0191513	0.488669	0.848349
341	LPC(22:6) [sn1]	0.194173	-0.106339	0.494685	0.204866	0.725448	-0.0722012	-0.321605	0.177202	0.569772	0.993025	-0.0138172	-2.09498	2.06734	0.989598	0.99449	-0.0305598	-0.300045	0.238926	0.823786	0.992818	0.0100764	-0.00451326	0.0246661	0.175418	0.631503
342	LPC(22:6) [sn2]	0.240534	-0.0588162	0.539883	0.115043	0.686817	-0.0884702	-0.336909	0.159969	0.484484	0.993025	-0.874455	-2.94756	1.19865	0.40766	0.990282	-0.0411237	-0.309567	0.227319	0.763559	0.992818	0.00519784	-0.00933542	0.0197311	0.482589	0.846586
343	LPC(24:0) [sn1]	-0.0370544	-0.29375	0.219641	0.776832	0.952321	-0.0708676	-0.283907	0.142171	0.513702	0.993025	-0.208999	-1.98671	1.56872	0.817426	0.990282	-0.00560153	-0.235794	0.224591	0.961888	0.999302	0.00425132	-0.00821112	0.0167137	0.503033	0.853739
344	LPC(24:0) [sn2]	0.0979046	-0.156071	0.35188	0.449192	0.81565	-0.0716728	-0.282455	0.139109	0.504407	0.993025	-0.508928	-2.26781	1.24995	0.569968	0.990282	-0.0155922	-0.243346	0.212162	0.893059	0.998774	0.00644922	-0.00588117	0.0187796	0.304636	0.775621
345	LPC(26:0) [sn1]	0.077665	-0.181323	0.336653	0.556017	0.867657	-0.0256633	-0.240605	0.189278	0.814634	0.993025	-0.593249	-2.38684	1.20034	0.516095	0.990282	0.0732702	-0.158978	0.305518	0.535659	0.992818	-0.00472382	-0.0172975	0.00784989	0.460794	0.839187
346	LPC(26:0) [sn2]	0.290543	0.0318598	0.549226	0.0277878	0.55448	-0.0296417	-0.24433	0.185047	0.786304	0.993025	0.477997	-1.31348	2.26948	0.600367	0.990282	0.191159	-0.0408163	0.423134	0.106075	0.992818	-0.00417076	-0.0167297	0.00838817	0.514405	0.856788
347	LPC(O-16:0)	0.161084	-0.137626	0.459794	0.28989	0.757473	-0.047355	-0.295263	0.200553	0.707605	0.993025	0.110211	-1.95847	2.17889	0.91668	0.990282	-0.138734	-0.406603	0.129135	0.309388	0.992818	0.0073757	-0.00712651	0.0218779	0.318172	0.778197
348	LPC(O-18:0)	0.12575	-0.166943	0.418444	0.399024	0.805145	-0.0183834	-0.261298	0.224531	0.881864	0.993025	-0.333032	-2.36004	1.69398	0.74699	0.990282	-0.262415	-0.524889	5.8614e-05	0.050051	0.992818	0.00747565	-0.00673445	0.0216857	0.301832	0.774931
349	LPC(O-18:1)	0.0453172	-0.254019	0.344654	0.766258	0.952321	-0.0528195	-0.301248	0.195609	0.676332	0.993025	-0.186555	-2.25957	1.88646	0.859734	0.990282	-0.109732	-0.378164	0.158699	0.422275	0.992818	0.012212	-0.00232066	0.0267446	0.0993729	0.53822
350	LPC(O-20:0)	0.0348192	-0.25762	0.327258	0.815141	0.955938	-0.0926991	-0.335403	0.150005	0.45337	0.993025	-0.484593	-2.50985	1.54066	0.638491	0.990282	-0.231698	-0.493944	0.0305483	0.0832073	0.992818	0.00664979	-0.00754798	0.0208476	0.357915	0.811014
351	LPC(O-20:1)	0.0243623	-0.276516	0.32524	0.87367	0.980029	-0.132133	-0.38184	0.117574	0.299021	0.993025	-0.634867	-2.71856	1.44883	0.549709	0.990282	-0.144609	-0.414423	0.125204	0.292853	0.992818	0.00846307	-0.00614439	0.0230705	0.255552	0.74611
352	LPC(O-22:0)	0.152621	-0.132094	0.437336	0.292773	0.757882	-0.109056	-0.34535	0.127237	0.364972	0.993025	-0.441378	-2.41314	1.53038	0.660279	0.990282	-0.182933	-0.438253	0.0723861	0.159847	0.992818	0.000876023	-0.0129467	0.0146988	0.90096	0.972905
353	LPC(O-22:1)	-0.0154021	-0.310733	0.279929	0.918432	0.985945	-0.160058	-0.405161	0.0850454	0.200091	0.993025	-1.16089	-3.20616	0.884391	0.265325	0.990282	-0.156914	-0.421753	0.107925	0.244958	0.992818	0.0102335	-0.00410462	0.0245717	0.16146	0.617418
354	LPC(O-24:0)	0.170796	-0.11119	0.452783	0.234615	0.735677	-0.109465	-0.343493	0.124564	0.35856	0.993025	-0.0322347	-1.9851	1.92063	0.974142	0.99449	0.00698434	-0.245888	0.259857	0.956746	0.999302	-0.00136501	-0.0150553	0.0123253	0.844776	0.948994
355	LPC(O-24:1)	0.109114	-0.186362	0.40459	0.468472	0.81565	-0.152047	-0.397271	0.0931764	0.223732	0.993025	-0.986088	-3.03237	1.06019	0.344216	0.990282	0.0259853	-0.238984	0.290954	0.847293	0.992818	0.00283941	-0.0115058	0.0171846	0.697534	0.897411
356	LPC(O-24:2)	0.170095	-0.124123	0.464312	0.25657	0.740989	-0.158924	-0.403104	0.0852555	0.20159	0.993025	-0.723632	-2.7612	1.31394	0.485662	0.990282	0.0318308	-0.23201	0.295671	0.812734	0.992818	0.00354876	-0.0107353	0.0178329	0.625689	0.880012
357	LPC(P-16:0)	0.13929	-0.152958	0.431538	0.34952	0.79101	-0.0522706	-0.294816	0.190274	0.672183	0.993025	-0.205959	-2.22989	1.81797	0.841618	0.990282	-0.148357	-0.410432	0.113717	0.266593	0.992818	0.00392272	-0.0102658	0.0181112	0.58725	0.873572
358	LPC(P-17:0) (a)	0.0528343	-0.239381	0.34505	0.722571	0.946118	-0.0869664	-0.329484	0.155551	0.481432	0.993025	0.787864	-1.23584	2.81157	0.444701	0.990282	-0.194377	-0.456422	0.0676683	0.145647	0.992818	0.0015872	-0.0125997	0.0157741	0.826115	0.938009
359	LPC(P-17:0) (b)	0.158068	-0.140495	0.456631	0.298768	0.760859	-0.000363098	-0.248149	0.247423	0.997704	0.998995	0.491443	-1.57622	2.5591	0.640729	0.990282	-0.140852	-0.408589	0.126886	0.301831	0.992818	-0.000399619	-0.0148947	0.0140954	0.956826	0.988431
360	LPC(P-18:0)	0.131136	-0.155346	0.417618	0.368914	0.797422	-0.0577784	-0.295538	0.179981	0.633259	0.993025	0.0713702	-1.91262	2.05537	0.943685	0.992558	-0.297156	-0.55406	-0.0402523	0.0234753	0.992818	0.00390545	-0.0100031	0.017814	0.581421	0.873572
361	LPC(P-18:1)	0.123279	-0.166474	0.413031	0.403613	0.805145	-0.0871312	-0.327605	0.153342	0.476881	0.993025	-0.439184	-2.44583	1.56746	0.667382	0.990282	-0.154993	-0.414829	0.104844	0.24178	0.992818	0.0112959	-0.0027714	0.0253632	0.115282	0.53822
362	LPC(P-20:0)	-0.0362778	-0.319316	0.246761	0.801286	0.952321	-0.0729623	-0.307864	0.161939	0.541978	0.993025	-0.534657	-2.4948	1.42549	0.592272	0.990282	-0.321335	-0.575151	-0.0675196	0.0131926	0.992818	0.000291828	-0.0134495	0.0140332	0.966735	0.989753
363	PE(15-MHDA_18:1)	0.192267	-0.082536	0.467071	0.169869	0.725448	0.0319112	-0.196156	0.259978	0.783509	0.993025	0.72942	-1.1737	2.63254	0.451796	0.990282	-0.0811545	-0.327586	0.165276	0.517925	0.992818	-0.0117014	-0.025043	0.00164014	0.0854747	0.53822
364	PE(15-MHDA_18:2)	0.354659	0.0701713	0.639146	0.0146527	0.55448	0.193346	-0.0427587	0.42945	0.108271	0.993025	0.892155	-1.07803	2.86234	0.374075	0.990282	0.0947657	-0.16035	0.349881	0.465853	0.992818	-0.00792942	-0.0217411	0.00588229	0.259885	0.74611
365	PE(15-MHDA_20:4)	0.275366	-0.00280635	0.553539	0.0523476	0.643127	0.0117667	-0.219097	0.24263	0.920277	0.993025	0.941651	-0.984798	2.8681	0.337349	0.990282	-0.0481202	-0.297572	0.201332	0.704855	0.992818	-0.0126653	-0.0261704	0.000839793	0.0659879	0.52117
366	PE(15-MHDA_22:6)	0.34065	0.0544026	0.626898	0.0197728	0.55448	0.0821342	-0.155431	0.319699	0.497292	0.993025	0.686225	-1.29615	2.6686	0.496757	0.990282	-0.0751222	-0.331816	0.181572	0.565572	0.992818	-0.0125464	-0.0264436	0.00135075	0.0767134	0.53822
367	PE(16:0_16:0)	0.287784	0.0368761	0.538693	0.0246604	0.55448	-0.0154021	-0.223638	0.192834	0.88452	0.993025	-0.153544	-1.89118	1.58409	0.862245	0.990282	0.0546717	-0.170331	0.279675	0.6333	0.992818	-0.00610798	-0.0182894	0.00607348	0.325041	0.781309
368	PE(16:0_16:1)	0.291521	0.0317965	0.551246	0.02789	0.55448	-0.145829	-0.361382	0.0697243	0.184395	0.993025	-0.727393	-2.52608	1.0713	0.427271	0.990282	0.0281752	-0.204734	0.261084	0.812236	0.992818	-0.00862482	-0.0212343	0.00398466	0.17961	0.640636
369	PE(16:0_18:1)	0.120181	-0.112047	0.352409	0.309765	0.774582	-0.10231	-0.295043	0.0904223	0.297483	0.993025	-0.63141	-2.23968	0.976857	0.440872	0.990282	0.0158025	-0.192449	0.224054	0.881549	0.993897	-0.00555088	-0.0168254	0.00572366	0.333868	0.784209
370	PE(16:0_18:2)	0.131437	-0.109719	0.372593	0.284772	0.757436	-0.0128905	-0.213033	0.187252	0.899357	0.993025	-0.975762	-2.64586	0.694334	0.251568	0.990282	0.0571535	-0.159104	0.273411	0.603829	0.992818	-0.000950881	-0.0126589	0.0107571	0.873289	0.962858
371	PE(16:0_18:3) (a)	0.109958	-0.152082	0.371999	0.410092	0.81225	0.0171132	-0.200362	0.234588	0.877198	0.993025	-1.13185	-2.94658	0.682878	0.221009	0.990282	-0.0136824	-0.248668	0.221304	0.90897	0.999302	-0.00984024	-0.0225622	0.00288169	0.129226	0.568303
372	PE(16:0_18:3) (b)	0.0924011	-0.166814	0.351617	0.484043	0.827668	-0.00448461	-0.219615	0.210646	0.967348	0.993025	-0.816464	-2.61163	0.978702	0.371987	0.990282	-0.0435027	-0.275955	0.18895	0.713267	0.992818	-0.00490578	-0.0174906	0.00767899	0.444116	0.839187
373	PE(16:0_20:3)	-0.00909049	-0.256544	0.238364	0.942492	0.990936	0.0127539	-0.192615	0.218123	0.90294	0.993025	-0.579133	-2.29285	1.13458	0.507033	0.990282	0.0785997	-0.143306	0.300505	0.486818	0.992818	-0.000386819	-0.0124006	0.0116269	0.949586	0.988418
374	PE(16:0_20:4)	0.0674951	-0.173223	0.308213	0.581965	0.878052	-0.173893	-0.373671	0.0258855	0.0878608	0.993025	-0.585974	-2.25303	1.08109	0.490147	0.990282	-0.0677679	-0.283632	0.148097	0.537658	0.992818	-0.00591462	-0.0176013	0.00577209	0.320548	0.778706
375	PE(16:0_20:5)	0.103852	-0.166986	0.37469	0.451594	0.81565	-0.142187	-0.366963	0.0825894	0.214523	0.993025	-1.17714	-3.0528	0.698513	0.218149	0.990282	-0.0476823	-0.290557	0.195193	0.699873	0.992818	-0.00870183	-0.0218509	0.0044472	0.19413	0.656797
376	PE(16:0_22:6)	0.106632	-0.172039	0.385302	0.452543	0.81565	-0.217828	-0.449105	0.0134491	0.0648366	0.993025	-1.38708	-3.31698	0.54282	0.158546	0.990282	-0.00167518	-0.251574	0.248224	0.989497	0.999302	-0.011626	-0.0251553	0.00190331	0.0919751	0.53822
377	PE(16:1_18:2)	0.227574	-0.0279248	0.483073	0.0807359	0.650738	-0.0407328	-0.252779	0.171313	0.706035	0.993025	-0.804649	-2.57408	0.964779	0.372052	0.990282	0.0898561	-0.139264	0.318976	0.441364	0.992818	-0.0009946	-0.0133989	0.0114097	0.874891	0.963251
378	PE(16:1_20:4)	0.229045	-0.0287619	0.486853	0.0815089	0.650738	-0.0644016	-0.278363	0.14956	0.554547	0.993025	0.0124528	-1.77296	1.79787	0.989072	0.99449	-0.0442964	-0.275486	0.186893	0.706754	0.992818	-0.00452998	-0.0170464	0.00798642	0.477377	0.846586
379	PE(17:0_18:1)	0.128402	-0.128347	0.385151	0.326303	0.774582	0.00929741	-0.203786	0.222381	0.93172	0.993025	-0.102467	-1.88055	1.67562	0.909902	0.990282	-0.0811965	-0.311437	0.149044	0.488719	0.992818	-0.0112022	-0.0236672	0.00126283	0.0780622	0.53822
380	PE(17:0_18:2)	0.129516	-0.127875	0.386907	0.323336	0.774582	0.076381	-0.137235	0.289997	0.482699	0.993025	0.278629	-1.5039	2.06116	0.758896	0.990282	0.0427442	-0.188072	0.273561	0.716138	0.992818	-0.00702465	-0.0195208	0.00547155	0.269936	0.746417
381	PE(17:0_20:4)	0.226565	-0.0473837	0.500513	0.104819	0.656077	0.00277365	-0.224584	0.230131	0.980888	0.993025	1.05466	-0.842541	2.95185	0.275283	0.990282	-0.104272	-0.349936	0.141393	0.404733	0.992818	-0.0105018	-0.0238019	0.00279821	0.121452	0.552963
382	PE(17:0_22:6)	0.237457	-0.04287	0.517784	0.0966898	0.650738	-0.0646098	-0.297261	0.168042	0.585577	0.993025	-0.261476	-2.20285	1.67989	0.791416	0.990282	-0.000331218	-0.251716	0.251053	0.997936	0.999302	-0.0154594	-0.0290691	-0.00184969	0.0260732	0.52089
383	PE(18:0_18:1)	-0.031606	-0.273274	0.210062	0.797327	0.952321	-0.110139	-0.310706	0.0904282	0.281161	0.993025	-1.36855	-3.04219	0.305089	0.108783	0.990282	-0.0840003	-0.300717	0.132716	0.446707	0.992818	-0.00270995	-0.0144428	0.00902288	0.650182	0.889118
384	PE(18:0_18:2)	0.0294212	-0.204189	0.263031	0.804674	0.952321	0.0229673	-0.170912	0.216847	0.81606	0.993025	-0.921839	-2.53968	0.695998	0.263476	0.990282	0.0616578	-0.147833	0.271148	0.563357	0.992818	0.00241363	-0.008928	0.0137553	0.67605	0.890413
385	PE(18:0_20:3) (a)	-0.0890392	-0.314545	0.136466	0.438271	0.81565	-0.0876283	-0.274782	0.0995253	0.358072	0.993025	-0.585863	-2.14758	0.975848	0.461449	0.990282	0.0345324	-0.167691	0.236755	0.737393	0.992818	0.00695163	-0.00399654	0.0178998	0.2128	0.677808
386	PE(18:0_20:3) (b)	0.0830571	-0.179374	0.345488	0.534356	0.850089	-0.0498997	-0.267699	0.1679	0.652817	0.993025	-0.0878251	-1.90526	1.72961	0.924401	0.990978	-0.0772481	-0.312584	0.158088	0.519291	0.992818	-0.00227848	-0.0150194	0.0104624	0.725477	0.911557
387	PE(18:0_20:4)	-0.005694	-0.243857	0.232469	0.962555	0.992966	-0.105717	-0.303375	0.0919416	0.293857	0.993025	0.0591519	-1.59022	1.70852	0.943856	0.992558	-0.0501972	-0.263771	0.163377	0.644451	0.992818	-0.00324885	-0.0148115	0.00831384	0.581176	0.873572
388	PE(18:0_22:4)	0.127022	-0.121921	0.375965	0.316603	0.774582	-0.0675344	-0.274139	0.13907	0.521033	0.993025	-0.469353	-2.19338	1.25467	0.592979	0.990282	-0.0719536	-0.295194	0.151287	0.526865	0.992818	-0.00256362	-0.0146497	0.00952242	0.677051	0.890413
389	PE(18:0_22:5) (n3)	0.0882791	-0.133569	0.310128	0.434706	0.81565	-0.149553	-0.333671	0.0345656	0.111153	0.993025	-1.23345	-2.76983	0.302934	0.115356	0.990282	-0.0723445	-0.271288	0.126599	0.475288	0.992818	-0.00639123	-0.0171619	0.00437938	0.244237	0.729881
390	PE(18:0_22:5) (n6)	0.0181195	-0.242338	0.278577	0.89134	0.981783	-0.0728571	-0.289018	0.143304	0.508153	0.993025	-0.145934	-1.9497	1.65783	0.873771	0.990282	-0.0902432	-0.32381	0.143323	0.448154	0.992818	-0.00190858	-0.0145537	0.0107365	0.766944	0.920433
391	PE(18:0_22:6)	0.178676	-0.0702903	0.427642	0.15916	0.725448	-0.137785	-0.344409	0.0688393	0.190753	0.993025	-0.996493	-2.72068	0.727691	0.256714	0.990282	0.0572602	-0.166001	0.280521	0.614566	0.992818	-0.00932603	-0.0214132	0.00276113	0.130178	0.569254
392	PE(18:1_18:1)	-0.0675976	-0.354619	0.219424	0.643776	0.917647	-0.0689623	-0.30717	0.169245	0.569759	0.993025	-0.148912	-2.13665	1.83882	0.883046	0.990282	-0.0238583	-0.281246	0.23353	0.855568	0.992818	0.00822837	-0.00570637	0.0221631	0.246548	0.731643
393	PE(18:1_18:2)	-0.0449262	-0.31224	0.222387	0.741392	0.946118	0.000695529	-0.221156	0.222547	0.995088	0.997666	-0.375282	-2.22653	1.47597	0.690597	0.990282	0.0870738	-0.152641	0.326788	0.475778	0.992818	0.00756699	-0.00541094	0.0205449	0.252533	0.743196
394	PE(18:1_22:6) (a)	0.133018	-0.13295	0.398986	0.326283	0.774582	-0.140286	-0.36102	0.0804488	0.212381	0.993025	-1.00073	-2.84266	0.841202	0.286298	0.990282	0.0684057	-0.170102	0.306914	0.57336	0.992818	-0.00428248	-0.0171951	0.00863012	0.514967	0.856788
395	PE(18:1_22:6) (b)	0.164246	-0.118192	0.446684	0.253785	0.738456	-0.0682559	-0.302659	0.166147	0.567516	0.993025	-0.120092	-2.07608	1.8359	0.904037	0.990282	0.0673334	-0.185944	0.320611	0.601689	0.992818	-0.015908	-0.0296202	-0.00219579	0.0230663	0.52089
396	PE(20:0_20:4)	0.177539	-0.0685197	0.423597	0.156934	0.725448	0.0314612	-0.17275	0.235672	0.762258	0.993025	-0.947218	-2.65127	0.756829	0.275317	0.990282	-0.0998573	-0.320511	0.120796	0.374367	0.992818	0.000909227	-0.0110368	0.0128552	0.881193	0.963338
397	PE(36:0)	0.100256	-0.2047	0.405213	0.518641	0.843345	-0.00522253	-0.258315	0.24787	0.967678	0.993025	0.377417	-1.73452	2.48936	0.725662	0.990282	-0.188773	-0.462244	0.0846982	0.175649	0.992818	0.00113536	-0.0136701	0.0159408	0.880304	0.963338
398	PE(38:5) (a)	0.0143358	-0.226209	0.254881	0.906837	0.981783	-0.167338	-0.366973	0.0322964	0.100215	0.993025	-0.0252266	-1.69109	1.64064	0.976277	0.99449	-0.0547518	-0.270461	0.160958	0.618226	0.992818	-0.00557828	-0.0172566	0.00610004	0.348466	0.802716
399	PE(38:5) (b)	0.107538	-0.134647	0.349724	0.383419	0.797759	-0.0965769	-0.297574	0.10442	0.345621	0.993025	-0.304921	-1.98215	1.37231	0.721109	0.990282	-0.0637486	-0.28093	0.153432	0.564411	0.992818	-0.00175539	-0.0135134	0.0100026	0.769405	0.920433
400	PE(O-16:0/18:2)	0.204282	-0.0743677	0.482931	0.150396	0.714758	0.0289793	-0.20228	0.260238	0.805632	0.993025	0.56774	-1.36201	2.49749	0.563515	0.990282	0.0621394	-0.18774	0.312019	0.625361	0.992818	-0.00154787	-0.0150761	0.0119804	0.822233	0.938009
401	PE(O-16:0/20:3)	0.116602	-0.167611	0.400816	0.420607	0.81565	-0.00904445	-0.244921	0.226832	0.93998	0.993025	0.679953	-1.28833	2.64824	0.497639	0.990282	-0.00909612	-0.263966	0.245773	0.944128	0.999302	0.000739762	-0.0130586	0.0145382	0.916156	0.978076
[truncated: 332 more rows]

## Sheet: 1H
1H: Effect of mode of delivery and duration of labour on maternal serum lipid classes
[truncated: 39 more rows]

[truncated: 9 more sheets: 1I, 1J, 1K, 1L, 1M, 1N, 1O, 1P, 1Q]
