# Supplementary figures and images for: Ontogeny of circulating lipid metabolism in pregnancy and early childhood – a longitudinal population study
Source: eLife journal article supplement (doi:10.7554/elife.72779), 2022-02-28

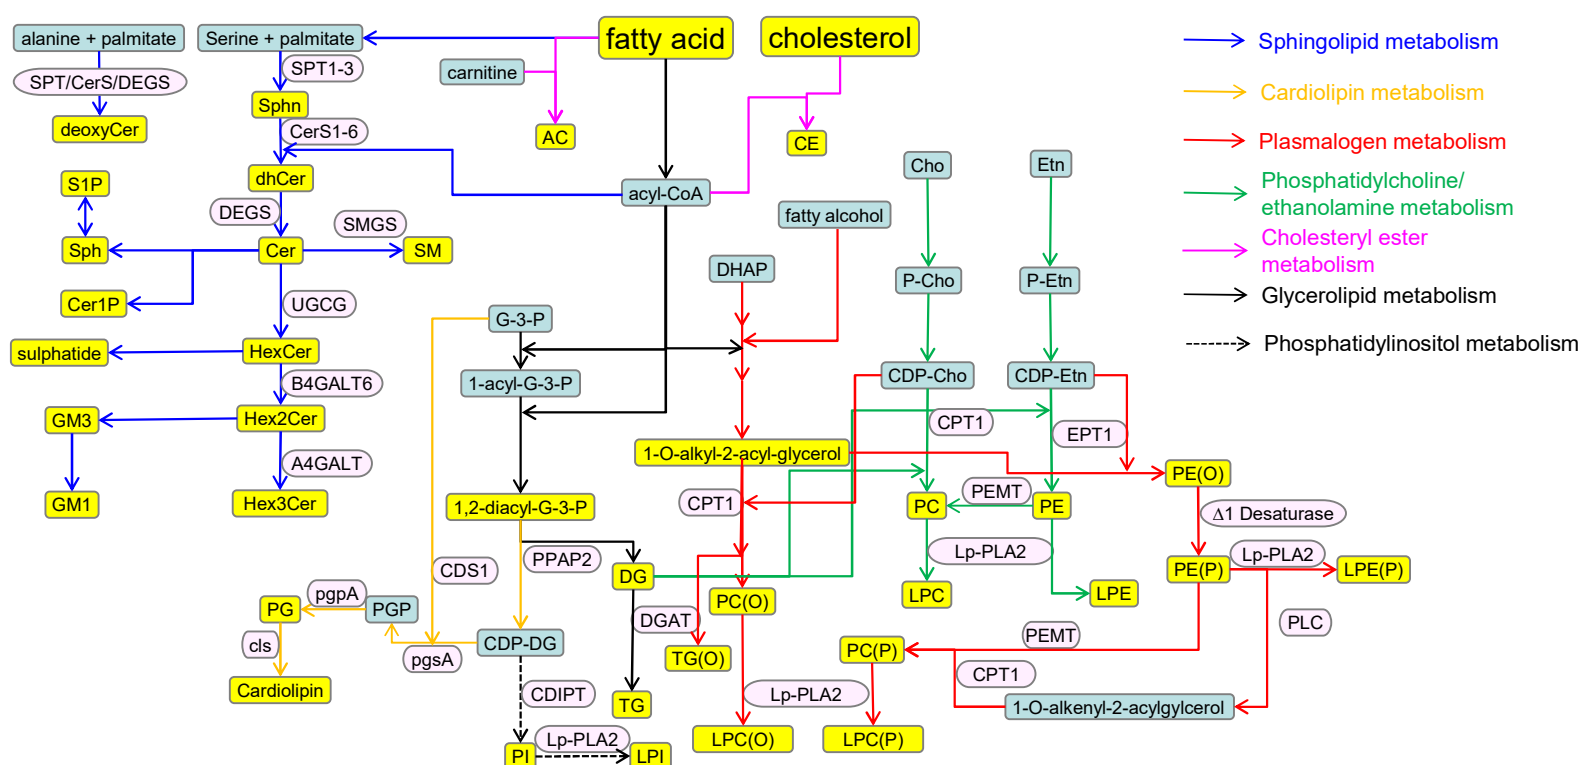

Supplement: supp [file elife-72779-supp-v1.zip]
